# Supplementary material for: Molecular Mechanism of TMEM126A Modulating PANoptosis and Proliferation via TRAF6/NF-κB Signalling Pathway in Non-Small Cell Lung Cancer
Source: Research Square preprint supplement (doi:10.21203/rs.3.rs-7527532/v1), 2025-09-19
Supplement: Supplementary file 1 [file 0e225f7cadd0add157d2029b.docx]

***Immunohistochemical staining***

All NSCLC tissue specimens were fixed in 4% formalin, embedded in paraffin, and processed into approximately 4-μm-thick sections. The expression of TMEM126A in lung cancer tissues was detected using SP immunohistochemical staining. Briefly, tissue specimens were incubated overnight with a TMEM126A rabbit polyclonal antibody (DF13916, 1:200, Affinity, USA) at 4°C. Following a PBS wash, a biotinylated secondary antibody (Maixin, Fuzhou, China) was incubated at 37°C for 30 min, followed by DAB staining (Maixin).

***Immunofluorescence***

Approximately 500 cells/well were seeded into a 24-well culture plate, fixed with 4% paraformaldehyde for 10 min, and incubated with 0.1% Triton X-100 for 10 min. After blocking with 3% bovine serum albumin (BSA) for 1 h, the cells were incubated overnight with a primary antibody at 4°C. The next day, following a PBS buffer wash, the cells were incubated with a secondary antibody at 37°C for 1 h, and the cell nuclei were stained with DAPI for 5 min. A fluorescence confocal microscope (Carl Zeiss, Thornwood, NY, USA) was used for observation and analysis.

***Plasmids and short-hairpin RNA (shRNA)***

Myc-pCMV6-TMEM126A plasmid was purchased from OriGene Technologies (#RC203188, Rockville, MD, USA). Myc-pCMV6-TMEM126A mutants were constructed by Taihe Biotechnology Company (Beijing, China). Flag-pcDNA3.0-TRAF6 and shRNA-TRAF6 were obtained from MiaoLing Plasmid (Hubei, China). The shTMEM126A plasmid was constructed by GenePharma Corporation (Shanghai, China). The shRNA-TRAF6 target gene sequence was 3’-GCAACTTTGGAATGCATTTGA-5’; the shTMEM126A-1 target gene sequence was 3’-GGGAACATCTAAGTTACT-5’; and the shTMEM126A-2 target gene sequence was 3’-CAGCATACCTTGGGTCTGA-5’.

***Protein extraction and western blotting***

Cells were lysed using NP40 lysis buffer (Beyotime Biotechnology) with 1% PMSF for 30 min on ice and centrifuged at 12000 rpm for 20 min at 4°C to collect the supernatant. Protein concentration was determined using a BCA protein assay kit (Beyotime Biotechnology). Proteins were separated by SDS-PAGE and transferred onto a PVDF membrane. Subsequently, the membrane was sealed with 5% skimmed milk for 2 h at 25°C and incubated with different primary antibodies overnight at 4°C. The membranes were incubated with horseradish peroxidase (HRP)-labelled goat anti-rabbit or goat anti-mouse secondary antibodies (Cell Signalling Technology, Danvers, MA, USA) for 2 h at room temperature. Finally, the target proteins were visualised using an enhanced chemiluminescence assay kit (Thermo Fisher Scientific).

***Nuclear and cytoplasmic protein separation experiment***

Cells transfected with the indicated plasmids were resuspended in ice-cold lysis buffer supplemented with protease inhibitors (210 mM mannitol, 70 mM sucrose, 5 mM Tris, pH 7.5, and 1 mM EDTA). After incubation on ice for 15 min, the cells were homogenised and centrifuged to separate the nuclei (at 12000 rpm for 10 min at 4°C), which were pelleted and washed with PBS, and then subsequently resuspended on ice for 5 min in RIPA buffer (#P0027-2, Beyotime Biotechnology). After centrifugation and precipitation, the supernatant (nuclear fraction) was collected and transferred to a fresh 1.5-ml test tube. The lysate was quantified using the BCA method, and western blotting was performed on equal amounts of total protein.

***Antibodies information***

TMEM126A (#DF13916, IB/1:500) was purchased from Affinity Biosciences (California, USA).Myc-tag (#2276, IB/1:1000), Flag-tag (#14793, IB/1:1000), β-Tublin (#2128, IB/1:1000), CDK4 (#12790, IB/1:1000), CDK6 (#13331, IB/1:1000), CyclinD1 (#2292, IB/1:500), Caspase-3 (#9662, IB/1:1000), Cleaved Caspase-3 (#9661, IB/1:500), BAX (#2772, IB/1:1000), Bcl-2 (#4223, IB/1:1000), TAK (#4505, IB/1:1000), p-TAK (#4508, IB/1:1000), p-IKK (#2697, IB/1:1000), p-RIPK-3 (#91702, IB/1:1000), p-IKK (#2697, IB/1:1000) and p-IκBα (#4812, IB/1:1000) were purchased Cell Signalling Technology (Danvers, MA, USA).GAPDH (#60004-1-Ig, IB/1:1000), RIPK-3 (#29080-1-AP, IB/1:500), MLKL (#66675-1-Ig, IB/1:500), p-MLKL (#82090-2-RR, IB/1:500), GSDMD (#20770-1-AP, IB/1:500), IKK (#15649-1-AP, IB/1:500), IκBα (#10268-1-AP, IB/1:500), P65 (#66535-1-Ig, IB/1:500), LaminB1 (#12987-1-AP, IB/1:1000), P62 (#18420-1-AP, IB/1:500) and LC3 (#14600-1-AP, IB/1:500) were purchased from ProteinTech company (Wuhan, China). TRAF6 antibody for immunoprecipitation (#sc-8409, IB/1:500) was purchased from Santa Cruz Biotechnology (Santa Cruz, CA, USA). TRAF6 antibody for immunoblotting, IHC, and immunofluorescence (#TA336330, IB/1:500, IHC:1:50, IF/1:50) was purchased from Origene company (Rockwell, Maryland, USA).

***Quantitative real-time polymerase chain reaction (qRT-PCR)***

Total RNA was extracted from the cells according to the manufacturer's instructions using an RNA extraction kit (Vazyme, Nanjing, China) and reverse-transcribed using a cDNA synthesis kit (Vazyme). RT-qPCR was performed using SYBR Green PCR Master Mix and a total reaction system of 20 μl. Each experimental group consisted of three replicates. The reaction conditions, according to the manufacturer's instructions, were as follows: 42°C for 5 min, 95°C for 30 s, 95°C for 5 s, and 60°C for 30 s. This process was repeated for 40 cycles. The difference in gene expression was represented by 2-ΔΔCt, with GAPDH mRNA levels serving as an internal reference. Each experiment was performed in triplicate.

***5-Ethynyl-2′-deoxyuridine (EdU) staining***

Cells were inoculated at an appropriate density in a 24-well cell culture plate for 24 h, and then the EdU substrate (#C0075S, Beyotime Biotechnology) was added and incubated for 2 h. The cells were washed thrice with PBS containing 3% bovine serum albumin (BSA) for 5 min each. Cells were fixed with 4% paraformaldehyde for 10 min, crosslinked with 2 mg/ml glycine for 10 min, and permeabilised with 0.3% Triton for 10 min. Subsequently, 200 μl of Click solution was added and incubated in the dark at room temperature for 30 min. Cell nuclei were stained with 200 μl of 1× Hoechst 33342 solution and observed and analysed using confocal laser microscopy (Carl Zeiss).

***Oxazole yellow/ Propidium iodide (YO- PRO-1/PI) staining***

Cells were inoculated according to the experimental design in a 24-well cell culture plate for 24 h. The cells were washed twice with PBS. According to the manufacturer's instructions (C1075S, Beyotime Biotechnology), a YO-PRO-1/PI working solution was prepared, and 250 μl of it was used to incubate in the dark at 37°C for 20 min. Using a confocal laser microscope to capture images, YO-PRO-1-stained positive cells exhibited green fluorescence at excitation/emission (Ex/Im)=491/509 nm, whereas PI-positive cells exhibited red fluorescence at Ex/Im=535/617 nm.

***Subcutaneous xenograft tumour experiment***

A total of 21 female BALB/c nude mice, aged 4–6 weeks and weighing approximately 16–20 g, were purchased from Charles River Company (Beijing, China). Both feed and drinking water were sterilised within a semi-barrier system, maintaining constant temperature and humidity. The cell concentration of each group (0.2 ml) was adjusted to 5 × 106 cells/ml and subcutaneously injected into the backs of nude mice. Following a continuous 5-week observation period post-injection, in the 3rd week, JSH23 (3 mg/kg) was injected into the mice in each treatment group. After continuous monitoring for 21 days from the date of injection, all experimental groups were euthanised, and the weight and size of the tumours were recorded.
