# Supplementary material for: Molecular Mechanism of TMEM126A Modulating PANoptosis and Proliferation via TRAF6/NF-κB Signalling Pathway in Non-Small Cell Lung Cancer
Source: Research Square preprint supplement (doi:10.21203/rs.3.rs-7527532/v1), 2025-09-19
Supplement: Supplementary file 2 [file 4f7c418cad66cf4307ecd9fe.docx]

**Supplementary Figure S1. TMEM126A modulates the proliferation and PANoptosis processes of NSCLC through NF-κB signalling pathway.**

**A,B:** H1299 cells and A549 cells were transfected with shRNA-control or shRNA-TMEM126A, and 36 h later, the culture medium was replaced with the media containing DMSO or JSH23 (10 μM) for 12 h. The proliferative activity was assessed by EdU staining assay. Magnification, 400×; Scale bar, 50 μm.

**C:** Immunoblotting indicatedNF-κB signalling pathway inhibitor JSH-23 could eliminate the promoting effect mediated by TMEM126A knockdown on proliferation-associated proteins. GAPDH was used as a loading control.

**D-F:** YO-PRO-1/PI staining and immunoblotting detection showed that JSH-23 abrogated the biological effect of TMEM126A knockdown on PANoptosis inhibition, meanwhile its regulatory effects on the expression levels of cleaved caspase-3, Bax, Bcl-2, p-RIPK3, p-MLKL, and GSDMD-N proteins. Magnification, 200×; Scale bar, 100 μm.

Data was presented in a statistical bar chart (mean ± standard deviation, n = 3). NS: not significant; **: *P* < 0.01; ***: *P* < 0.001.

**Supplementary Figure S2. TMEM126A promotes the PANoptosis of lung cancer cells and suppressed their proliferation *in* *vitro*.**

**A-E:** EdU proliferation assay and immunoblotting demonstrated that overexpression of TMEM126A in H460 and H1299 cells inhibited cell proliferation (A-D) and decreased the expression of cell proliferation-related proteins CDK4, CDK6, and CyclinD1, with GAPDH serving as the loading control. TMEM126A mutant plasmid didn’t exert this biological effect (E). Magnification, 400×; Scale bar, 50 μm.

**F-J:** YO-PRO-1/PI fluorescence double-staining and immunoblotting revealed that TMEM126A overexpression promoted PANoptosis in tumour cells (F-I) and promotes the upregulation of apoptosis-related (C-caspase-3, BAX), necroptosis-related (p-RIP3 and p-MLKL), and pyroptosis-related (GSDMD-N) proteins while downregulating the expression of anti-apoptotic proteins (BCL-2). While TMEM126A mutant plasmid didn’t exert this biological effect (J). GAPDH served as the loading control. Magnification, 200×; Scale bar, 100 μm.

The experimental results are presented as a statistical bar chart (mean ± standard deviation, n = 3). NS: not significant; ***: *P* < 0.001.

**Supplementary Figure S3. TMEM126A enhances autophagy process in NSCLC.**

**A,B:** TMEM126A plasmid was transfected into H460 and H1299 cell lines, respectively, transmission electron microscopy was performed to reveal that TMEM126A overexpression increased the number of autophagosomes in cancer cells. Scale Bar: 500 nm.

**C-F:** Immunofluorescence analysis revealed that TMEM126A ectopic expression increased the number of autophagic spots (LC3 staining) (C, D), Magnification, 400×; Scale bar, 25 μm. Data was presented as mean ± standard deviation (E, F). **: *P* < 0.01; ***: *P* < 0.001.
