# Supplementary material for: Molecular Mechanism of TMEM126A Modulating PANoptosis and Proliferation via TRAF6/NF-κB Signalling Pathway in Non-Small Cell Lung Cancer
Source: Research Square preprint supplement (doi:10.21203/rs.3.rs-7527532/v1), 2025-09-19
Supplement: Supplementary file 3 [file 890c14fa5c7306b0b668acf9.xlsx]

## Sheet: Sheet1
gene_id	gene_name	EntrezID	transcript_id	GO	KEGG	KO_ENTRY	EC	Description	trans_type	DO	Reactome	FPKM.A5_Si1	FPKM.A5_Si2	FPKM.A5_Si3	FPKM.A5_SNC1	FPKM.A5_SNC2	FPKM.A5_SNC3	fc	log2(fc)	pval	qval	regulation	significant
ENSG00000215182	MUC5AC	36564	ENST00000621226	GO:0002223(stimulatory C-type lectin receptor signaling pathway);GO:0005201(extracellular matrix structural constituent);GO:0005515(protein binding);GO:0005576(extracellular region);GO:0005615(extracellular space);GO:0005737(cytoplasm);GO:0005796(Golgi lumen);GO:0005886(plasma membrane);GO:0016266(O-glycan processing);GO:0048015(phosphatidylinositol-mediated signaling);GO:0070062(extracellular ex…	04657(IL-17 signaling pathway)	K21125	NA	mucin 5AC, oligomeric mucus/gel-forming [Source:HGNC Symbol;Acc:HGNC:7515]	protein_coding	DOID:2841(asthma);DOID:18(urinary_system_disease);DOID:1176(bronchial_disease);DOID:0080001(bone_disease);DOID:2392(glandular_cystitis);DOID:2871(endometrial_carcinoma);DOID:0002116(pterygium);DOID:10021(duodenum_cancer);DOID:0050624(gastrointestinal_system_benign_neoplasm);DOID:1612(breast_cancer);DOID:3437(laryngitis);DOID:17(musculoskeletal_system_disease);DOID:5679(retinal_disease);DOID:3111(…	R_HSA_977068(Termination_of_O_glycan_biosynthesis);R_HSA_3781865(Diseases_of_glycosylation);R_HSA_5621481(C_type_lectin_receptors_(CLRs));R_HSA_597592(Post_translational_protein_modification);R_HSA_5083636(Defective_GALNT12_causes_colorectal_cancer_1_(CRCS1));R_HSA_5083625(Defective_GALNT3_causes_familial_hyperphosphatemic_tumoral_calcinosis_(HFTC));R_HSA_5173105(O_linked_glycosylation);R_HSA_168…	1.27042	1.27339	1.23773	12.9462	14.2804	11.1427	0.0985564	-3.34291	3.73054e-129	1.30401e-124	down	yes
ENSG00000123358	NR4A1	54602;54600;54593;54607;54604;54609;54594;54595;54612;54605;54603;54611;54596;54598;54592;54597;54599	ENST00000394825;ENST00000243050;ENST00000546842;ENST00000550557;ENST00000548232;ENST00000550339;ENST00000553200;ENST00000545748;ENST00000565848;ENST00000562373;ENST00000394824;ENST00000550582;ENST00000550082;ENST00000478250;ENST00000360284;ENST00000549102;ENST00000547206	GO:0000790(nuclear chromatin);GO:0000977(RNA polymerase II regulatory region sequence-specific DNA binding);GO:0000978(RNA polymerase II cis-regulatory region sequence-specific DNA binding);GO:0000981(DNA-binding transcription factor activity, RNA polymerase II-specific);GO:0001228(DNA-binding transcription activator activity, RNA polymerase II-specific);GO:0001938(positive regulation of endothel…	04010(MAPK signaling pathway);04151(PI3K-Akt signaling pathway);04925(Aldosterone synthesis and secretion);04927(Cortisol synthesis and secretion);04934(Cushing syndrome);04934(Cushing syndrome)	K04465	NA	nuclear receptor subfamily 4 group A member 1 [Source:HGNC Symbol;Acc:HGNC:7980]	protein_coding;retained_intron;processed_transcript	DOID:684(hepatocellular_carcinoma);DOID:1240(leukemia);DOID:934(viral_infectious_disease);DOID:2531(hematologic_cancer);DOID:0050687(cell_type_cancer);DOID:3571(liver_cancer);DOID:0050117(disease_by_infectious_agent);DOID:4(disease);DOID:409(liver_disease);DOID:77(gastrointestinal_system_disease);DOID:643(progressive_multifocal_leukoencephalopathy);DOID:162(cancer);DOID:1909(melanoma);DOID:3119(g…	R_HSA_212436(Generic_Transcription_Pathway);R_HSA_9006925(Intracellular_signaling_by_second_messengers);R_HSA_198693(AKT_phosphorylates_targets_in_the_nucleus);R_HSA_74160(Gene_expression_(Transcription));R_HSA_383280(Nuclear_Receptor_transcription_pathway);R_HSA_73857(RNA_Polymerase_II_Transcription);R_HSA_162582(Signal_Transduction);R_HSA_2219528(PI3K/AKT_Signaling_in_Cancer);R_HSA_1257604(PIP3…	1.0463	1.39061	1.10926	17.7264	14.8643	13.3239	0.077234	-3.69462	6.52345e-97	1.14014e-92	down	yes
ENSG00000275395	FCGBP	120657	ENST00000616721	GO:0005515(protein binding)	NA	NA	NA	Fc fragment of IgG binding protein [Source:HGNC Symbol;Acc:HGNC:13572]	protein_coding	NA	NA	0.370454	0.29974	0.333769	3.10386	3.57353	3.00423	0.103698	-3.26954	1.01525e-81	1.18294e-77	down	yes
ENSG00000115414	FN1	140135;140140;140136;140138;140137;140147;140144;140142;140141;140152;140149;140146;140155;140161;140139;140159;140143;140145;140148;140150;140156;140153;140154;140158;140160;140151	ENST00000421182;ENST00000359671;ENST00000354785;ENST00000336916;ENST00000323926;ENST00000456923;ENST00000432072;ENST00000446046;ENST00000492816;ENST00000461974;ENST00000469569;ENST00000356005;ENST00000438981;ENST00000496542;ENST00000357867;ENST00000471193;ENST00000443816;ENST00000498719;ENST00000494446;ENST00000473614;ENST00000474036;ENST00000485567;ENST00000460217;ENST00000480737;ENST00000426059…	GO:0001525(angiogenesis);GO:0001932(regulation of protein phosphorylation);GO:0002020(protease binding);GO:0002576(platelet degranulation);GO:0005102(signaling receptor binding);GO:0005178(integrin binding);GO:0005201(extracellular matrix structural constituent);GO:0005515(protein binding);GO:0005518(collagen binding);GO:0005576(extracellular region);GO:0005577(fibrinogen complex);GO:0005604(base…	04151(PI3K-Akt signaling pathway);04510(Focal adhesion);04512(ECM-receptor interaction);04810(Regulation of actin cytoskeleton);04933(AGE-RAGE signaling pathway in diabetic complications);05100(Bacterial invasion of epithelial cells);05146(Amoebiasis);05165(Human papillomavirus infection);05200(Pathways in cancer);05205(Proteoglycans in cancer);05222(Small cell lung cancer);05222(Small cell lung …	NA	NA	fibronectin 1 [Source:HGNC Symbol;Acc:HGNC:3778]	protein_coding;retained_intron	DOID:18(urinary_system_disease);DOID:0080001(bone_disease);DOID:1240(leukemia);DOID:934(viral_infectious_disease);DOID:2531(hematologic_cancer);DOID:1324(lung_cancer);DOID:17(musculoskeletal_system_disease);DOID:5082(liver_cirrhosis);DOID:225(syndrome);DOID:0050687(cell_type_cancer);DOID:0050117(disease_by_infectious_agent);DOID:4(disease);DOID:0050828(artery_disease);DOID:1749(squamous_cell_carc…	R_HSA_597592(Post_translational_protein_modification);R_HSA_1474244(Extracellular_matrix_organization);R_HSA_5683057(MAPK_family_signaling_cascades);R_HSA_76005(Response_to_elevated_platelet_cytosolic_Ca2+);R_HSA_1280215(Cytokine_Signaling_in_Immune_system);R_HSA_76009(Platelet_Aggregation_(Plug_Formation));R_HSA_6802949(Signaling_by_RAS_mutants);R_HSA_6802955(Paradoxical_activation_of_RAF_signal…	15.74	15.6601	21.2214	142.541	135.892	115.646	0.133531	-2.90476	9.26049e-74	8.09251e-70	down	yes
ENSG00000283293	RN7SK	195870	ENST00000636484	NA	NA	NA	NA	RNA component of 7SK nuclear ribonucleoprotein [Source:HGNC Symbol;Acc:HGNC:10037]	snRNA	NA	NA	127.186	112.351	50.7961	1.38926	2.3058	1.92387	51.6705	5.69127	2.61148e-73	1.82569e-69	up	yes
ENSG00000173110	HSPA6	22375	ENST00000309758	GO:0000166(nucleotide binding);GO:0005515(protein binding);GO:0005524(ATP binding);GO:0005576(extracellular region);GO:0005634(nucleus);GO:0005737(cytoplasm);GO:0005814(centriole);GO:0005829(cytosol);GO:0005886(plasma membrane);GO:0006986(response to unfolded protein);GO:0008180(COP9 signalosome);GO:0016192(vesicle-mediated transport);GO:0016887(ATPase activity);GO:0019899(enzyme binding);GO:0031…	03040(Spliceosome);04010(MAPK signaling pathway);04141(Protein processing in endoplasmic reticulum);04144(Endocytosis);04213(Longevity regulating pathway - multiple species);04612(Antigen processing and presentation);04915(Estrogen signaling pathway);05134(Legionellosis);05145(Toxoplasmosis);05162(Measles);05164(Influenza A)	K03283	NA	heat shock protein family A (Hsp70) member 6 [Source:HGNC Symbol;Acc:HGNC:5239]	protein_coding	DOID:4(disease);DOID:1287(cardiovascular_system_disease);DOID:178(vascular_disease);DOID:7(disease_of_anatomical_entity)	R_HSA_2262752(Cellular_responses_to_stress);R_HSA_8953897(Cellular_responses_to_external_stimuli);R_HSA_3371556(Cellular_response_to_heat_stress);R_HSA_168249(Innate_Immune_System);R_HSA_3371511(HSF1_activation);R_HSA_3371453(Regulation_of_HSF1_mediated_heat_shock_response);R_HSA_168256(Immune_System);R_HSA_3371568(Attenuation_phase);R_HSA_6798695(Neutrophil_degranulation);R_HSA_3371571(HSF1_depe…	0.041085	0.185698	0.123396	8.45102	8.03881	4.82283	0.0164306	-5.92747	1.87806e-68	1.09413e-64	down	yes
ENSG00000117983	MUC5B	36567;36572;36566;36568	ENST00000529681;ENST00000527802;ENST00000525715;ENST00000531082	GO:0002223(stimulatory C-type lectin receptor signaling pathway);GO:0005515(protein binding);GO:0005576(extracellular region);GO:0005615(extracellular space);GO:0005796(Golgi lumen);GO:0005886(plasma membrane);GO:0016266(O-glycan processing);GO:0043231(intracellular membrane-bounded organelle);GO:0070062(extracellular exosome);GO:0070062(extracellular exosome)	04657(IL-17 signaling pathway);04970(Salivary secretion);04970(Salivary secretion)	K13908	NA	mucin 5B, oligomeric mucus/gel-forming [Source:HGNC Symbol;Acc:HGNC:7516]	protein_coding;processed_transcript;retained_intron	DOID:850(lung_disease);DOID:4(disease);DOID:1579(respiratory_system_disease);DOID:2742(auditory_system_disease);DOID:162(cancer);DOID:3770(pulmonary_fibrosis);DOID:3082(interstitial_lung_disease);DOID:552(pneumonia);DOID:863(nervous_system_disease);DOID:14566(disease_of_cellular_proliferation);DOID:0050155(sensory_system_disease);DOID:0050161(lower_respiratory_tract_disease);DOID:5100(middle_ear_…	R_HSA_977068(Termination_of_O_glycan_biosynthesis);R_HSA_3781865(Diseases_of_glycosylation);R_HSA_5621481(C_type_lectin_receptors_(CLRs));R_HSA_597592(Post_translational_protein_modification);R_HSA_5083636(Defective_GALNT12_causes_colorectal_cancer_1_(CRCS1));R_HSA_5083625(Defective_GALNT3_causes_familial_hyperphosphatemic_tumoral_calcinosis_(HFTC));R_HSA_5173105(O_linked_glycosylation);R_HSA_168…	0.701543	0.695611	0.777169	4.8775	6.74796	4.46559	0.135126	-2.88762	3.75864e-66	1.8769e-62	down	yes
ENSG00000129911	KLF16	113135;113137;113134;113136	ENST00000250916;ENST00000592313;ENST00000541015;ENST00000617223	GO:0000122(negative regulation of transcription by RNA polymerase II);GO:0000790(nuclear chromatin);GO:0000976(transcription regulatory region sequence-specific DNA binding);GO:0000978(RNA polymerase II cis-regulatory region sequence-specific DNA binding);GO:0000981(DNA-binding transcription factor activity, RNA polymerase II-specific);GO:0001227(DNA-binding transcription repressor activity, RNA …	NA	K09208	NA	Kruppel like factor 16 [Source:HGNC Symbol;Acc:HGNC:16857]	protein_coding;nonsense_mediated_decay	NA	NA	2.16663	1.96509	2.47497	16.7671	16.0492	14.3176	0.140169	-2.83476	3.0834e-65	1.34725e-61	down	yes
ENSG00000281383	FP671120	148441	ENST00000629969	NA	NA	NA	NA	novel transcript, similar to YY1 associated myogenesis RNA 1 YAM1	lncRNA	NA	NA	5626.22	3617.24	2012.64	206.702	156.909	188.97	20.37	4.34838	1.52369e-60	5.91784e-57	up	yes
ENSG00000280800	FP671120	148433	ENST00000631211	NA	NA	NA	NA	novel transcript, similar to YY1 associated myogenesis RNA 1 YAM1	lncRNA	NA	NA	9790.14	5908.43	3408.38	357.64	270.959	303.651	20.4955	4.35724	2.36926e-60	8.28173e-57	up	yes
ENSG00000172037	LAMB2	160217;160231;160220;160225;160216;160221;160227;160222;160228;160218;160229;160233;160232;160223;160230;160219;160226;160224	ENST00000305544;ENST00000493571;ENST00000498377;ENST00000542580;ENST00000467506;ENST00000469665;ENST00000464891;ENST00000477225;ENST00000483057;ENST00000418109;ENST00000486298;ENST00000483321;ENST00000488638;ENST00000480640;ENST00000477701;ENST00000484713;ENST00000462930;ENST00000538659	GO:0000904(cell morphogenesis involved in differentiation);GO:0005178(integrin binding);GO:0005198(structural molecule activity);GO:0005201(extracellular matrix structural constituent);GO:0005515(protein binding);GO:0005576(extracellular region);GO:0005604(basement membrane);GO:0005608(laminin-3 complex);GO:0005788(endoplasmic reticulum lumen);GO:0007155(cell adhesion);GO:0007411(axon guidance);G…	04151(PI3K-Akt signaling pathway);04510(Focal adhesion);04512(ECM-receptor interaction);05145(Toxoplasmosis);05146(Amoebiasis);05165(Human papillomavirus infection);05200(Pathways in cancer);05222(Small cell lung cancer);05222(Small cell lung cancer)	NA	NA	laminin subunit beta 2 [Source:HGNC Symbol;Acc:HGNC:6487]	protein_coding;retained_intron;processed_transcript	DOID:18(urinary_system_disease);DOID:0060037(developmental_disorder_of_mental_health);DOID:934(viral_infectious_disease);DOID:225(syndrome);DOID:0050117(disease_by_infectious_agent);DOID:4(disease);DOID:1059(intellectual_disability);DOID:409(liver_disease);DOID:77(gastrointestinal_system_disease);DOID:557(kidney_disease);DOID:1883(hepatitis_C);DOID:162(cancer);DOID:1184(nephrotic_syndrome);DOID:1…	R_HSA_597592(Post_translational_protein_modification);R_HSA_1474244(Extracellular_matrix_organization);R_HSA_3000178(ECM_proteoglycans);R_HSA_3000157(Laminin_interactions);R_HSA_6806834(Signaling_by_MET);R_HSA_162582(Signal_Transduction);R_HSA_3000171(Non_integrin_membrane_ECM_interactions);R_HSA_392499(Metabolism_of_proteins);R_HSA_381426(Regulation_of_Insulin_like_Growth_Factor_(IGF)_transport_…	3.72827	4.03522	4.76598	27.3879	26.427	19.9877	0.16977	-2.55835	1.29361e-58	4.11075e-55	down	yes
ENSG00000011028	MRC2	104223;104228;104224;104229;104230;104232	ENST00000303375;ENST00000583597;ENST00000584265;ENST00000579432;ENST00000446119;ENST00000580916	GO:0001649(osteoblast differentiation);GO:0005515(protein binding);GO:0005518(collagen binding);GO:0005925(focal adhesion);GO:0006897(endocytosis);GO:0016020(membrane);GO:0016021(integral component of membrane);GO:0030246(carbohydrate binding);GO:0030574(collagen catabolic process);GO:0038023(signaling receptor activity);GO:0038023(signaling receptor activity)	04145(Phagosome);05152(Tuberculosis);05152(Tuberculosis)	K06560	NA	mannose receptor C type 2 [Source:HGNC Symbol;Acc:HGNC:16875]	protein_coding;retained_intron;processed_transcript	DOID:0050687(cell_type_cancer);DOID:4(disease);DOID:1749(squamous_cell_carcinoma);DOID:162(cancer);DOID:14566(disease_of_cellular_proliferation);DOID:305(carcinoma)	R_HSA_983169(Class_I_MHC_mediated_antigen_processing_&_presentation);R_HSA_1236978(Cross_presentation_of_soluble_exogenous_antigens_(endosomes));R_HSA_168256(Immune_System);R_HSA_1236975(Antigen_processing_Cross_presentation);R_HSA_1280218(Adaptive_Immune_System)	8.87301	8.67393	10.9298	57.9149	56.4697	42.326	0.181715	-2.46025	8.19377e-58	2.38678e-54	down	yes
ENSG00000099822	HCN2	112603	ENST00000251287	GO:0000166(nucleotide binding);GO:0005216(ion channel activity);GO:0005222(intracellular cAMP-activated cation channel activity);GO:0005244(voltage-gated ion channel activity);GO:0005248(voltage-gated sodium channel activity);GO:0005249(voltage-gated potassium channel activity);GO:0005267(potassium channel activity);GO:0005272(sodium channel activity);GO:0005515(protein binding);GO:0005886(plasma…	04024(cAMP signaling pathway)	NA	NA	hyperpolarization activated cyclic nucleotide gated potassium and sodium channel 2 [Source:HGNC Symbol;Acc:HGNC:4846]	protein_coding	DOID:936(brain_disease);DOID:4(disease);DOID:863(nervous_system_disease);DOID:331(central_nervous_system_disease);DOID:1826(epilepsy_syndrome);DOID:7(disease_of_anatomical_entity)	R_HSA_1296071(Potassium_Channels);R_HSA_1296061(HCN_channels);R_HSA_112316(Neuronal_System)	5.8071	6.326	5.58365	34.5893	32.0587	26.5898	0.190017	-2.3958	4.96618e-57	1.33533e-53	down	yes
ENSG00000125730	C3	114272;114283;114282;114280;114290;114275;114281;114289;114273;114284;114278;114279;114276;114287;114274	ENST00000245907;ENST00000602053;ENST00000594005;ENST00000596238;ENST00000600744;ENST00000602229;ENST00000598805;ENST00000594936;ENST00000601475;ENST00000600763;ENST00000596548;ENST00000596179;ENST00000599668;ENST00000595577;ENST00000599899	GO:0001798(positive regulation of type IIa hypersensitivity);GO:0001934(positive regulation of protein phosphorylation);GO:0001970(positive regulation of activation of membrane attack complex);GO:0002376(immune system process);GO:0004866(endopeptidase inhibitor activity);GO:0005102(signaling receptor binding);GO:0005515(protein binding);GO:0005576(extracellular region);GO:0005615(extracellular sp…	04080(Neuroactive ligand-receptor interaction);04145(Phagosome);04610(Complement and coagulation cascades);05133(Pertussis);05134(Legionellosis);05140(Leishmaniasis);05142(Chagas disease (American trypanosomiasis));05150(Staphylococcus aureus infection);05152(Tuberculosis);05167(Kaposi sarcoma-associated herpesvirus infection);05168(Herpes simplex virus 1 infection);05203(Viral carcinogenesis);05…	NA	NA	complement C3 [Source:HGNC Symbol;Acc:HGNC:1318]	protein_coding;retained_intron;processed_transcript	DOID:18(urinary_system_disease);DOID:1307(dementia);DOID:5223(infertility);DOID:654(overnutrition);DOID:437(myasthenia_gravis);DOID:2377(multiple_sclerosis);DOID:5679(retinal_disease);DOID:630(genetic_disease);DOID:225(syndrome);DOID:936(brain_disease);DOID:0050117(disease_by_infectious_agent);DOID:576(proteinuria);DOID:4(disease);DOID:612(primary_immunodeficiency_disease);DOID:0050828(artery_dis…	R_HSA_375276(Peptide_ligand_binding_receptors);R_HSA_166658(Complement_cascade);R_HSA_597592(Post_translational_protein_modification);R_HSA_373076(Class_A/1_(Rhodopsin_like_receptors));R_HSA_9658195(Leishmania_infection);R_HSA_173736(Alternative_complement_activation);R_HSA_168249(Innate_Immune_System);R_HSA_198933(Immunoregulatory_interactions_between_a_Lymphoid_and_a_non_Lymphoid_cell);R_HSA_16…	6.39375	8.49661	8.56506	54.8699	49.538	39.8924	0.162546	-2.62108	1.75466e-54	4.38101e-51	down	yes
ENSG00000277209	RPPH1	66771	ENST00000516869	NA	NA	NA	NA	ribonuclease P RNA component H1 [Source:HGNC Symbol;Acc:HGNC:19273]	ribozyme	NA	R_HSA_6784531(tRNA_processing_in_the_nucleus);R_HSA_72306(tRNA_processing);R_HSA_8953854(Metabolism_of_RNA)	59.9592	30.3786	22.087	0.48159	0.486338	0.131088	102.296	6.6766	5.73725e-52	1.33697e-48	up	yes
ENSG00000035862	TIMP2	106782;106785;106781;106783;106780	ENST00000262768;ENST00000592761;ENST00000536189;ENST00000586057;ENST00000585421	GO:0002020(protease binding);GO:0004857(enzyme inhibitor activity);GO:0005178(integrin binding);GO:0005515(protein binding);GO:0005576(extracellular region);GO:0005615(extracellular space);GO:0007417(central nervous system development);GO:0007568(aging);GO:0008191(metalloendopeptidase inhibitor activity);GO:0008270(zinc ion binding);GO:0008285(negative regulation of cell population proliferation)…	NA	K22583	NA	TIMP metallopeptidase inhibitor 2 [Source:HGNC Symbol;Acc:HGNC:11821]	protein_coding;nonsense_mediated_decay	DOID:0080001(bone_disease);DOID:1307(dementia);DOID:17(musculoskeletal_system_disease);DOID:0050687(cell_type_cancer);DOID:574(peripheral_nervous_system_disease);DOID:4(disease);DOID:0050828(artery_disease);DOID:1289(neurodegenerative_disease);DOID:13099(Moyamoya_disease);DOID:848(arthritis);DOID:162(cancer);DOID:1909(melanoma);DOID:10652(Alzheimer's_disease);DOID:3627(aortic_aneurysm);DOID:680(t…	R_HSA_1474244(Extracellular_matrix_organization);R_HSA_168249(Innate_Immune_System);R_HSA_1592389(Activation_of_Matrix_Metalloproteinases);R_HSA_168256(Immune_System);R_HSA_6798695(Neutrophil_degranulation);R_HSA_1474228(Degradation_of_the_extracellular_matrix)	19.7219	23.6315	19.8743	105.178	102.429	80.1923	0.219693	-2.18644	1.11975e-47	2.4463e-44	down	yes
ENSG00000180066	LINC02870	35857;35856	ENST00000392630;ENST00000490765	NA	NA	NA	NA	long intergenic non-protein coding RNA 2870 [Source:HGNC Symbol;Acc:HGNC:27275]	lncRNA	NA	NA	9.36163	12.7543	10.7612	1.19153	1.5647	1.05339	8.63007	3.10937	6.7756e-47	1.39318e-43	up	yes
ENSG00000130164	LDLR	115390;115391;115384;115386;115392;115389;115394;115398;115396;115385;115395;115393;115388	ENST00000558518;ENST00000558013;ENST00000557933;ENST00000557958;ENST00000252444;ENST00000545707;ENST00000558528;ENST00000560628;ENST00000559340;ENST00000560502;ENST00000560173;ENST00000560467;ENST00000535915	GO:0001540(amyloid-beta binding);GO:0001618(virus receptor activity);GO:0002020(protease binding);GO:0005041(low-density lipoprotein particle receptor activity);GO:0005509(calcium ion binding);GO:0005515(protein binding);GO:0005764(lysosome);GO:0005768(endosome);GO:0005769(early endosome);GO:0005770(late endosome);GO:0005794(Golgi apparatus);GO:0005886(plasma membrane);GO:0005887(integral compone…	04144(Endocytosis);04913(Ovarian steroidogenesis);04925(Aldosterone synthesis and secretion);04927(Cortisol synthesis and secretion);04934(Cushing syndrome);04976(Bile secretion);04979(Cholesterol metabolism);05145(Toxoplasmosis);05160(Hepatitis C);05160(Hepatitis C)	K12473	NA	low density lipoprotein receptor [Source:HGNC Symbol;Acc:HGNC:6547]	protein_coding;retained_intron;processed_transcript;nonsense_mediated_decay	DOID:684(hepatocellular_carcinoma);DOID:1307(dementia);DOID:13810(familial_hypercholesterolemia);DOID:540(strabismus);DOID:934(viral_infectious_disease);DOID:4897(bile_duct_carcinoma);DOID:654(overnutrition);DOID:5679(retinal_disease);DOID:3526(cerebral_infarction);DOID:936(brain_disease);DOID:3571(liver_cancer);DOID:0050117(disease_by_infectious_agent);DOID:4(disease);DOID:0050828(artery_disease…	R_HSA_196854(Metabolism_of_vitamins_and_cofactors);R_HSA_382551(Transport_of_small_molecules);R_HSA_5653656(Vesicle_mediated_transport);R_HSA_174824(Plasma_lipoprotein_assembly,_remodeling,_and_clearance);R_HSA_2187338(Visual_phototransduction);R_HSA_199991(Membrane_Trafficking);R_HSA_9709957(Sensory_Perception);R_HSA_975634(Retinoid_metabolism_and_transport);R_HSA_8964043(Plasma_lipoprotein_clea…	3.00051	3.58327	3.94346	18.6182	17.4024	14.8577	0.20691	-2.27292	5.41407e-45	1.05138e-41	down	yes
ENSG00000204389	HSPA1A	193691	ENST00000375651	GO:0000166(nucleotide binding);GO:0001618(virus receptor activity);GO:0001664(G protein-coupled receptor binding);GO:0003714(transcription corepressor activity);GO:0003723(RNA binding);GO:0005102(signaling receptor binding);GO:0005515(protein binding);GO:0005524(ATP binding);GO:0005576(extracellular region);GO:0005634(nucleus);GO:0005654(nucleoplasm);GO:0005737(cytoplasm);GO:0005739(mitochondrion…	03040(Spliceosome);04010(MAPK signaling pathway);04141(Protein processing in endoplasmic reticulum);04144(Endocytosis);04213(Longevity regulating pathway - multiple species);04612(Antigen processing and presentation);04915(Estrogen signaling pathway);05020(Prion diseases);05134(Legionellosis);05145(Toxoplasmosis);05162(Measles);05164(Influenza A)	K03283	NA	heat shock protein family A (Hsp70) member 1A [Source:HGNC Symbol;Acc:HGNC:5232]	protein_coding	NA	R_HSA_2262752(Cellular_responses_to_stress);R_HSA_168274(Export_of_Viral_Ribonucleoproteins_from_Nucleus);R_HSA_168330(Viral_RNP_Complexes_in_the_Host_Cell_Nucleus);R_HSA_168255(Influenza_Infection);R_HSA_8953897(Cellular_responses_to_external_stimuli);R_HSA_450531(Regulation_of_mRNA_stability_by_proteins_that_bind_AU_rich_elements);R_HSA_3371556(Cellular_response_to_heat_stress);R_HSA_168249(Inn…	19.3154	23.8222	27.6837	191.928	141.215	115.414	0.157887	-2.66304	1.29494e-44	2.38235e-41	down	yes
ENSG00000188157	AGRN	8202;8211;8210;8208;8203;8204;8206;8209;8207	ENST00000379370;ENST00000461111;ENST00000492947;ENST00000466223;ENST00000620552;ENST00000651234;ENST00000469403;ENST00000478677;ENST00000479707	GO:0001523(retinoid metabolic process);GO:0002162(dystroglycan binding);GO:0005200(structural constituent of cytoskeleton);GO:0005201(extracellular matrix structural constituent);GO:0005509(calcium ion binding);GO:0005515(protein binding);GO:0005576(extracellular region);GO:0005604(basement membrane);GO:0005796(Golgi lumen);GO:0005829(cytosol);GO:0005886(plasma membrane);GO:0006024(glycosaminogly…	04512(ECM-receptor interaction);04512(ECM-receptor interaction)	K06254	NA	agrin [Source:HGNC Symbol;Acc:HGNC:329]	protein_coding;retained_intron	DOID:684(hepatocellular_carcinoma);DOID:1307(dementia);DOID:3571(liver_cancer);DOID:4(disease);DOID:1289(neurodegenerative_disease);DOID:162(cancer);DOID:10652(Alzheimer's_disease);DOID:3119(gastrointestinal_system_cancer);DOID:680(tauopathy);DOID:863(nervous_system_disease);DOID:14566(disease_of_cellular_proliferation);DOID:686(liver_carcinoma);DOID:331(central_nervous_system_disease);DOID:1561(…	R_HSA_196854(Metabolism_of_vitamins_and_cofactors);R_HSA_375165(NCAM_signaling_for_neurite_out_growth);R_HSA_3781865(Diseases_of_glycosylation);R_HSA_1474244(Extracellular_matrix_organization);R_HSA_2187338(Visual_phototransduction);R_HSA_9709957(Sensory_Perception);R_HSA_71387(Metabolism_of_carbohydrates);R_HSA_1971475(A_tetrasaccharide_linker_sequence_is_required_for_GAG_synthesis);R_HSA_566891…	4.07232	4.43748	6.39108	33.6273	31.903	24.0545	0.166333	-2.58786	1.78926e-44	3.12718e-41	down	yes
ENSG00000134871	COL4A2	66175;66176;66178;66189;66180;66173;66179;66184;66188;66187;66191;66183;66182;66185;66190;66192;66174	ENST00000360467;ENST00000650540;ENST00000619688;ENST00000649951;ENST00000617564;ENST00000649101;ENST00000462309;ENST00000650225;ENST00000649396;ENST00000650322;ENST00000463084;ENST00000494852;ENST00000478681;ENST00000483683;ENST00000480609;ENST00000648222;ENST00000480771	GO:0001525(angiogenesis);GO:0005201(extracellular matrix structural constituent);GO:0005515(protein binding);GO:0005576(extracellular region);GO:0005581(collagen trimer);GO:0005587(collagen type IV trimer);GO:0005604(basement membrane);GO:0005615(extracellular space);GO:0005788(endoplasmic reticulum lumen);GO:0006351(transcription, DNA-templated);GO:0007568(aging);GO:0014823(response to activity)…	04151(PI3K-Akt signaling pathway);04510(Focal adhesion);04512(ECM-receptor interaction);04926(Relaxin signaling pathway);04933(AGE-RAGE signaling pathway in diabetic complications);04974(Protein digestion and absorption);05146(Amoebiasis);05165(Human papillomavirus infection);05200(Pathways in cancer);05222(Small cell lung cancer);05222(Small cell lung cancer)	NA	NA	collagen type IV alpha 2 chain [Source:HGNC Symbol;Acc:HGNC:2203]	protein_coding;retained_intron;processed_transcript	DOID:225(syndrome);DOID:4(disease);DOID:162(cancer);DOID:14566(disease_of_cellular_proliferation)	R_HSA_375165(NCAM_signaling_for_neurite_out_growth);R_HSA_1474290(Collagen_formation);R_HSA_1442490(Collagen_degradation);R_HSA_1474244(Extracellular_matrix_organization);R_HSA_5653656(Vesicle_mediated_transport);R_HSA_1650814(Collagen_biosynthesis_and_modifying_enzymes);R_HSA_2173782(Binding_and_Uptake_of_Ligands_by_Scavenger_Receptors);R_HSA_3000480(Scavenging_by_Class_A_Receptors);R_HSA_300017…	2.3161	2.50448	3.58384	17.7804	17.6548	13.1976	0.172814	-2.53271	3.74578e-44	6.23494e-41	down	yes
ENSG00000204388	HSPA1B	193693	ENST00000375650	GO:0000166(nucleotide binding);GO:0001618(virus receptor activity);GO:0001664(G protein-coupled receptor binding);GO:0003723(RNA binding);GO:0005102(signaling receptor binding);GO:0005515(protein binding);GO:0005524(ATP binding);GO:0005576(extracellular region);GO:0005634(nucleus);GO:0005654(nucleoplasm);GO:0005737(cytoplasm);GO:0005739(mitochondrion);GO:0005783(endoplasmic reticulum);GO:0005813(…	03040(Spliceosome);04010(MAPK signaling pathway);04141(Protein processing in endoplasmic reticulum);04144(Endocytosis);04213(Longevity regulating pathway - multiple species);04612(Antigen processing and presentation);04915(Estrogen signaling pathway);05134(Legionellosis);05145(Toxoplasmosis);05162(Measles);05164(Influenza A)	K03283	NA	heat shock protein family A (Hsp70) member 1B [Source:HGNC Symbol;Acc:HGNC:5233]	protein_coding	NA	R_HSA_2262752(Cellular_responses_to_stress);R_HSA_8953897(Cellular_responses_to_external_stimuli);R_HSA_3371556(Cellular_response_to_heat_stress);R_HSA_168249(Innate_Immune_System);R_HSA_3371511(HSF1_activation);R_HSA_3371453(Regulation_of_HSF1_mediated_heat_shock_response);R_HSA_168256(Immune_System);R_HSA_3371568(Attenuation_phase);R_HSA_6798695(Neutrophil_degranulation);R_HSA_3371571(HSF1_depe…	15.7518	19.0315	23.7473	167.834	122.723	98.0276	0.150625	-2.73097	1.30265e-43	2.06974e-40	down	yes
ENSG00000174938	SEZ6L2	88163;88161;88165;88166;88167;88168	ENST00000308713;ENST00000346932;ENST00000617533;ENST00000563118;ENST00000568407;ENST00000562159	GO:0005783(endoplasmic reticulum);GO:0005789(endoplasmic reticulum membrane);GO:0005886(plasma membrane);GO:0008344(adult locomotory behavior);GO:0016020(membrane);GO:0016021(integral component of membrane);GO:0021680(cerebellar Purkinje cell layer development);GO:0043025(neuronal cell body);GO:0060074(synapse maturation);GO:0090036(regulation of protein kinase C signaling);GO:0090036(regulation …	NA	NA	NA	seizure related 6 homolog like 2 [Source:HGNC Symbol;Acc:HGNC:30844]	protein_coding;retained_intron;processed_transcript	DOID:0060037(developmental_disorder_of_mental_health);DOID:0060040(pervasive_developmental_disorder);DOID:4(disease);DOID:0060041(autism_spectrum_disorder);DOID:12849(autistic_disorder);DOID:150(disease_of_mental_health)	NA	1.33263	1.77582	2.04826	12.9333	11.4345	9.51858	0.152177	-2.71618	1.44711e-43	2.19929e-40	down	yes
ENSG00000123384	LRP1	56128;56134;56142;56129;56140;56138;56130;56135;56131;56141	ENST00000243077;ENST00000556830;ENST00000556356;ENST00000553277;ENST00000556247;ENST00000555941;ENST00000338962;ENST00000553446;ENST00000554174;ENST00000451724	GO:0001523(retinoid metabolic process);GO:0001540(amyloid-beta binding);GO:0002020(protease binding);GO:0002265(astrocyte activation involved in immune response);GO:0003723(RNA binding);GO:0005041(low-density lipoprotein particle receptor activity);GO:0005044(scavenger receptor activity);GO:0005509(calcium ion binding);GO:0005515(protein binding);GO:0005634(nucleus);GO:0005737(cytoplasm);GO:00057…	04979(Cholesterol metabolism);05010(Alzheimer disease);05144(Malaria);05144(Malaria)	K04550	NA	LDL receptor related protein 1 [Source:HGNC Symbol;Acc:HGNC:6692]	protein_coding;retained_intron;processed_transcript	DOID:0080001(bone_disease);DOID:3996(urinary_system_cancer);DOID:1307(dementia);DOID:13810(familial_hypercholesterolemia);DOID:934(viral_infectious_disease);DOID:2531(hematologic_cancer);DOID:17(musculoskeletal_system_disease);DOID:0050687(cell_type_cancer);DOID:1115(sarcoma);DOID:0050117(disease_by_infectious_agent);DOID:4(disease);DOID:0050828(artery_disease);DOID:1289(neurodegenerative_disease…	R_HSA_196854(Metabolism_of_vitamins_and_cofactors);R_HSA_2168880(Scavenging_of_heme_from_plasma);R_HSA_5653656(Vesicle_mediated_transport);R_HSA_2187338(Visual_phototransduction);R_HSA_9709957(Sensory_Perception);R_HSA_2173782(Binding_and_Uptake_of_Ligands_by_Scavenger_Receptors);R_HSA_975634(Retinoid_metabolism_and_transport);R_HSA_6806667(Metabolism_of_fat_soluble_vitamins);R_HSA_1430728(Metabo…	1.69313	1.51204	1.40343	7.03515	6.68496	5.16438	0.244042	-2.0348	1e-42	1.45646e-39	down	yes
ENSG00000099994	SUSD2	152628;152629	ENST00000358321;ENST00000463101	GO:0005515(protein binding);GO:0005886(plasma membrane);GO:0016020(membrane);GO:0016021(integral component of membrane);GO:0051782(negative regulation of cell division);GO:0070062(extracellular exosome);GO:1902807(negative regulation of cell cycle G1/S phase transition);GO:1902807(negative regulation of cell cycle G1/S phase transition)	NA	NA	NA	sushi domain containing 2 [Source:HGNC Symbol;Acc:HGNC:30667]	protein_coding;retained_intron	NA	NA	2.60291	3.26286	2.50827	17.5127	14.8644	11.9416	0.188951	-2.40392	3.18814e-41	4.45766e-38	down	yes
ENSG00000100242	SUN2	154716;154718;154721;154726;154732;154730;154722;154723;154735;154731;154725;154729;154737;154736;154738	ENST00000405510;ENST00000405018;ENST00000455125;ENST00000464202;ENST00000480307;ENST00000438058;ENST00000470642;ENST00000477262;ENST00000494273;ENST00000456894;ENST00000469086;ENST00000430185;ENST00000417332;ENST00000433561;ENST00000439339	GO:0000784(nuclear chromosome, telomeric region);GO:0000794(condensed nuclear chromosome);GO:0005515(protein binding);GO:0005521(lamin binding);GO:0005634(nucleus);GO:0005635(nuclear envelope);GO:0005637(nuclear inner membrane);GO:0005639(integral component of nuclear inner membrane);GO:0005768(endosome);GO:0006998(nuclear envelope organization);GO:0007052(mitotic spindle organization);GO:0007097…	NA	K19347	NA	Sad1 and UNC84 domain containing 2 [Source:HGNC Symbol;Acc:HGNC:14210]	protein_coding;retained_intron	DOID:630(genetic_disease);DOID:4(disease);DOID:0050177(monogenic_disease);DOID:0050739(autosomal_genetic_disease);DOID:0050737(autosomal_recessive_disease);DOID:3911(progeria)	R_HSA_1640170(Cell_Cycle);R_HSA_1500620(Meiosis);R_HSA_1221632(Meiotic_synapsis);R_HSA_1474165(Reproduction)	4.25969	4.00628	4.04695	18.7294	17.0389	13.1644	0.25163	-1.99062	4.12319e-41	5.54331e-38	down	yes
ENSG00000196878	LAMB3	25418;25422;25417;25420	ENST00000391911;ENST00000415782;ENST00000356082;ENST00000455193	GO:0005198(structural molecule activity);GO:0005201(extracellular matrix structural constituent);GO:0005515(protein binding);GO:0005576(extracellular region);GO:0005604(basement membrane);GO:0005610(laminin-5 complex);GO:0007155(cell adhesion);GO:0008544(epidermis development);GO:0009887(animal organ morphogenesis);GO:0009888(tissue development);GO:0016477(cell migration);GO:0030198(extracellular…	04151(PI3K-Akt signaling pathway);04510(Focal adhesion);04512(ECM-receptor interaction);05145(Toxoplasmosis);05146(Amoebiasis);05165(Human papillomavirus infection);05200(Pathways in cancer);05222(Small cell lung cancer);05222(Small cell lung cancer)	K06244	NA	laminin subunit beta 3 [Source:HGNC Symbol;Acc:HGNC:6490]	protein_coding	DOID:934(viral_infectious_disease);DOID:0050687(cell_type_cancer);DOID:0050117(disease_by_infectious_agent);DOID:4(disease);DOID:1749(squamous_cell_carcinoma);DOID:2730(epidermolysis_bullosa);DOID:635(acquired_immunodeficiency_syndrome);DOID:16(integumentary_system_disease);DOID:162(cancer);DOID:3119(gastrointestinal_system_cancer);DOID:37(skin_disease);DOID:526(Human_immunodeficiency_virus_infec…	R_HSA_1474290(Collagen_formation);R_HSA_1474244(Extracellular_matrix_organization);R_HSA_446728(Cell_junction_organization);R_HSA_3000157(Laminin_interactions);R_HSA_6806834(Signaling_by_MET);R_HSA_162582(Signal_Transduction);R_HSA_3000171(Non_integrin_membrane_ECM_interactions);R_HSA_2214320(Anchoring_fibril_formation);R_HSA_2022090(Assembly_of_collagen_fibrils_and_other_multimeric_structures);R…	1.50467	1.86556	1.61577	11.0966	8.89094	7.64887	0.180414	-2.47062	4.93096e-41	6.38377e-38	down	yes
ENSG00000187244	BCAM	121919;121918;121922;121925;121926;121921;121920;121923;121924	ENST00000270233;ENST00000611077;ENST00000588603;ENST00000589558;ENST00000588714;ENST00000591520;ENST00000588303;ENST00000590108;ENST00000590196	GO:0004888(transmembrane signaling receptor activity);GO:0005055(laminin receptor activity);GO:0005515(protein binding);GO:0005576(extracellular region);GO:0005886(plasma membrane);GO:0005887(integral component of plasma membrane);GO:0007155(cell adhesion);GO:0007160(cell-matrix adhesion);GO:0007165(signal transduction);GO:0008022(protein C-terminus binding);GO:0009897(external side of plasma mem…	NA	K06578	NA	basal cell adhesion molecule (Lutheran blood group) [Source:HGNC Symbol;Acc:HGNC:6722]	protein_coding;retained_intron;nonsense_mediated_decay	DOID:684(hepatocellular_carcinoma);DOID:630(genetic_disease);DOID:0050687(cell_type_cancer);DOID:3571(liver_cancer);DOID:4(disease);DOID:0050177(monogenic_disease);DOID:8432(polycythemia);DOID:3165(skin_benign_neoplasm);DOID:0050739(autosomal_genetic_disease);DOID:2994(germ_cell_cancer);DOID:0050737(autosomal_recessive_disease);DOID:0060085(organ_system_benign_neoplasm);DOID:162(cancer);DOID:3119…	NA	8.01347	10.2951	9.23724	45.0654	44.317	32.5167	0.225972	-2.14578	6.41685e-40	8.01074e-37	down	yes
ENSG00000179094	PER1	96405;96413;96424;96412;96419;96420;96415;96418;96422;96410;96421;96409;96417;96408;96414	ENST00000317276;ENST00000354903;ENST00000584202;ENST00000578950;ENST00000579203;ENST00000578223;ENST00000581395;ENST00000577424;ENST00000581703;ENST00000579098;ENST00000579065;ENST00000585284;ENST00000585095;ENST00000583677;ENST00000583559	GO:0000122(negative regulation of transcription by RNA polymerase II);GO:0000976(transcription regulatory region sequence-specific DNA binding);GO:0000978(RNA polymerase II cis-regulatory region sequence-specific DNA binding);GO:0001222(transcription corepressor binding);GO:0002028(regulation of sodium ion transport);GO:0005515(protein binding);GO:0005634(nucleus);GO:0005654(nucleoplasm);GO:00057…	04710(Circadian rhythm);04713(Circadian entrainment);04713(Circadian entrainment)	K21944	NA	period circadian regulator 1 [Source:HGNC Symbol;Acc:HGNC:8845]	protein_coding;retained_intron;nonsense_mediated_decay	DOID:0060037(developmental_disorder_of_mental_health);DOID:684(hepatocellular_carcinoma);DOID:1307(dementia);DOID:225(syndrome);DOID:0060040(pervasive_developmental_disorder);DOID:3571(liver_cancer);DOID:4(disease);DOID:1192(peripheral_nervous_system_neoplasm);DOID:1289(neurodegenerative_disease);DOID:9256(colorectal_cancer);DOID:5672(large_intestine_cancer);DOID:2621(autonomic_nervous_system_neo…	R_HSA_400253(Circadian_Clock)	1.26908	1.98849	1.06915	11.9842	11.2135	8.81428	0.13516	-2.88726	3.66496e-39	4.41754e-36	down	yes
ENSG00000102996	MMP15	90505;90506	ENST00000219271;ENST00000570065	GO:0004222(metalloendopeptidase activity);GO:0005515(protein binding);GO:0005886(plasma membrane);GO:0005887(integral component of plasma membrane);GO:0006464(cellular protein modification process);GO:0006508(proteolysis);GO:0008047(enzyme activator activity);GO:0008233(peptidase activity);GO:0008237(metallopeptidase activity);GO:0008270(zinc ion binding);GO:0016020(membrane);GO:0016021(integral …	04928(Parathyroid hormone synthesis, secretion and action);04928(Parathyroid hormone synthesis, secretion and action)	K07995	EC:3.4.24.-	matrix metallopeptidase 15 [Source:HGNC Symbol;Acc:HGNC:7161]	protein_coding	DOID:10286(prostate_carcinoma);DOID:0050687(cell_type_cancer);DOID:4(disease);DOID:3856(male_reproductive_organ_cancer);DOID:162(cancer);DOID:14566(disease_of_cellular_proliferation);DOID:4866(salivary_gland_adenoid_cystic_carcinoma);DOID:0050686(organ_system_cancer);DOID:10283(prostate_cancer);DOID:305(carcinoma);DOID:193(reproductive_organ_cancer)	R_HSA_1442490(Collagen_degradation);R_HSA_1474244(Extracellular_matrix_organization);R_HSA_1592389(Activation_of_Matrix_Metalloproteinases);R_HSA_1474228(Degradation_of_the_extracellular_matrix)	5.14514	5.67632	3.55741	29.0736	27.7257	21.4983	0.183644	-2.44502	2.60985e-38	3.04091e-35	down	yes
ENSG00000170345	FOS	71845;71841;71847;71850;71846;71842	ENST00000303562;ENST00000554617;ENST00000555686;ENST00000555347;ENST00000555242;ENST00000556324	GO:0000790(nuclear chromatin);GO:0000976(transcription regulatory region sequence-specific DNA binding);GO:0000978(RNA polymerase II cis-regulatory region sequence-specific DNA binding);GO:0000979(RNA polymerase II core promoter sequence-specific DNA binding);GO:0000981(DNA-binding transcription factor activity, RNA polymerase II-specific);GO:0001102(RNA polymerase II activating transcription fac…	01522(Endocrine resistance);04010(MAPK signaling pathway);04024(cAMP signaling pathway);04210(Apoptosis);04380(Osteoclast differentiation);04620(Toll-like receptor signaling pathway);04657(IL-17 signaling pathway);04658(Th1 and Th2 cell differentiation);04659(Th17 cell differentiation);04660(T cell receptor signaling pathway);04662(B cell receptor signaling pathway);04668(TNF signaling pathway);0…	NA	NA	Fos proto-oncogene, AP-1 transcription factor subunit [Source:HGNC Symbol;Acc:HGNC:3796]	protein_coding;processed_transcript	DOID:18(urinary_system_disease);DOID:0080001(bone_disease);DOID:684(hepatocellular_carcinoma);DOID:2394(ovarian_cancer);DOID:1324(lung_cancer);DOID:17(musculoskeletal_system_disease);DOID:225(syndrome);DOID:850(lung_disease);DOID:3571(liver_cancer);DOID:4(disease);DOID:1579(respiratory_system_disease);DOID:9256(colorectal_cancer);DOID:5041(esophageal_cancer);DOID:557(kidney_disease);DOID:5672(lar…	R_HSA_212436(Generic_Transcription_Pathway);R_HSA_2262752(Cellular_responses_to_stress);R_HSA_166520(Signaling_by_NTRKs);R_HSA_2559582(Senescence_Associated_Secretory_Phenotype_(SASP));R_HSA_6796648(TP53_Regulates_Transcription_of_DNA_Repair_Genes);R_HSA_975138(TRAF6_mediated_induction_of_NFkB_and_MAP_kinases_upon_TLR7/8_or_9_activation);R_HSA_9006931(Signaling_by_Nuclear_Receptors);R_HSA_448424(…	0.635979	0.884184	0.549206	7.35481	6.68922	4.31998	0.112686	-3.14962	4.65875e-38	5.25312e-35	down	yes
ENSG00000116016	EPAS1	129343;129348;129345;129349;129344;129342;129341;129347;129350;129346	ENST00000263734;ENST00000466465;ENST00000475822;ENST00000465318;ENST00000467888;ENST00000449347;ENST00000460015;ENST00000483692;ENST00000468530;ENST00000463191	GO:0000790(nuclear chromatin);GO:0000978(RNA polymerase II cis-regulatory region sequence-specific DNA binding);GO:0000981(DNA-binding transcription factor activity, RNA polymerase II-specific);GO:0000987(cis-regulatory region sequence-specific DNA binding);GO:0001228(DNA-binding transcription activator activity, RNA polymerase II-specific);GO:0001525(angiogenesis);GO:0001666(response to hypoxia)…	05200(Pathways in cancer);05211(Renal cell carcinoma);05211(Renal cell carcinoma)	NA	NA	endothelial PAS domain protein 1 [Source:HGNC Symbol;Acc:HGNC:3374]	protein_coding;retained_intron;processed_transcript	DOID:0080001(bone_disease);DOID:684(hepatocellular_carcinoma);DOID:3996(urinary_system_cancer);DOID:1612(breast_cancer);DOID:1324(lung_cancer);DOID:12510(retinal_ischemia);DOID:17(musculoskeletal_system_disease);DOID:5679(retinal_disease);DOID:3571(liver_cancer);DOID:4(disease);DOID:5166(endometrial_stromal_tumor);DOID:1192(peripheral_nervous_system_neoplasm);DOID:866(vein_disease);DOID:170(endoc…	R_HSA_2262752(Cellular_responses_to_stress);R_HSA_8849473(PTK6_Expression);R_HSA_597592(Post_translational_protein_modification);R_HSA_1234174(Cellular_response_to_hypoxia);R_HSA_8951664(Neddylation);R_HSA_1234176(Oxygen_dependent_proline_hydroxylation_of_Hypoxia_inducible_Factor_Alpha);R_HSA_8953897(Cellular_responses_to_external_stimuli);R_HSA_8848021(Signaling_by_PTK6);R_HSA_1266738(Developmen…	7.14537	9.14615	9.58968	41.5378	39.8936	30.8619	0.230479	-2.11729	1.05967e-37	1.15752e-34	down	yes
ENSG00000142949	PTPRF	13517;13524;13525;13522;13528;13526;13519;13516;13514;13521;13515;13513	ENST00000438120;ENST00000414879;ENST00000496447;ENST00000412568;ENST00000477970;ENST00000372407;ENST00000372405;ENST00000359947;ENST00000481019;ENST00000467464;ENST00000617451;ENST00000496043	GO:0004721(phosphoprotein phosphatase activity);GO:0004725(protein tyrosine phosphatase activity);GO:0005001(transmembrane receptor protein tyrosine phosphatase activity);GO:0005515(protein binding);GO:0005886(plasma membrane);GO:0005887(integral component of plasma membrane);GO:0006470(protein dephosphorylation);GO:0007155(cell adhesion);GO:0007185(transmembrane receptor protein tyrosine phospha…	04514(Cell adhesion molecules (CAMs));04520(Adherens junction);04910(Insulin signaling pathway);04931(Insulin resistance);04931(Insulin resistance)	K05695	EC:3.1.3.48	protein tyrosine phosphatase receptor type F [Source:HGNC Symbol;Acc:HGNC:9670]	protein_coding;processed_transcript	DOID:17(musculoskeletal_system_disease);DOID:4(disease);DOID:418(systemic_scleroderma);DOID:4194(glucose_metabolism_disease);DOID:417(hypersensitivity_reaction_type_II_disease);DOID:854(collagen_disease);DOID:0014667(disease_of_metabolism);DOID:0060056(hypersensitivity_reaction_disease);DOID:0060158(acquired_metabolic_disease);DOID:65(connective_tissue_disease);DOID:9351(diabetes_mellitus);DOID:2…	R_HSA_388844(Receptor_type_tyrosine_protein_phosphatases);R_HSA_8849932(Synaptic_adhesion_like_molecules);R_HSA_6794362(Protein_protein_interactions_at_synapses);R_HSA_112316(Neuronal_System)	8.81209	9.75659	8.44784	39.0659	35.662	27.1078	0.265295	-1.91433	1.09418e-36	1.15901e-33	down	yes
ENSG00000116604	MEF2D	21471;21470;21475;21476;21472	ENST00000348159;ENST00000464356;ENST00000493077;ENST00000489057;ENST00000360595	GO:0000790(nuclear chromatin);GO:0000976(transcription regulatory region sequence-specific DNA binding);GO:0000977(RNA polymerase II regulatory region sequence-specific DNA binding);GO:0000978(RNA polymerase II cis-regulatory region sequence-specific DNA binding);GO:0000981(DNA-binding transcription factor activity, RNA polymerase II-specific);GO:0001228(DNA-binding transcription activator activi…	04022(cGMP-PKG signaling pathway);04371(Apelin signaling pathway);04928(Parathyroid hormone synthesis, secretion and action);04928(Parathyroid hormone synthesis, secretion and action)	K09262	NA	myocyte enhancer factor 2D [Source:HGNC Symbol;Acc:HGNC:6997]	protein_coding;retained_intron	DOID:0050687(cell_type_cancer);DOID:4(disease);DOID:1289(neurodegenerative_disease);DOID:2994(germ_cell_cancer);DOID:162(cancer);DOID:14330(Parkinson's_disease);DOID:4766(embryoma);DOID:863(nervous_system_disease);DOID:14566(disease_of_cellular_proliferation);DOID:331(central_nervous_system_disease);DOID:7(disease_of_anatomical_entity);DOID:688(embryonal_cancer)	R_HSA_2262752(Cellular_responses_to_stress);R_HSA_166520(Signaling_by_NTRKs);R_HSA_400253(Circadian_Clock);R_HSA_8953897(Cellular_responses_to_external_stimuli);R_HSA_1592230(Mitochondrial_biogenesis);R_HSA_9031628(NGF_stimulated_transcription);R_HSA_1852241(Organelle_biogenesis_and_maintenance);R_HSA_198725(Nuclear_Events_(kinase_and_transcription_factor_activation));R_HSA_525793(Myogenesis);R_H…	3.58873	4.73401	4.44484	20.2333	18.6865	15.7845	0.233392	-2.09917	1.66556e-36	1.71235e-33	down	yes
ENSG00000186480	INSIG1	212024;212027;212023;212025;212026;212022	ENST00000340368;ENST00000468307;ENST00000425172;ENST00000342407;ENST00000476756;ENST00000344756	GO:0005515(protein binding);GO:0005783(endoplasmic reticulum);GO:0005789(endoplasmic reticulum membrane);GO:0006629(lipid metabolic process);GO:0006641(triglyceride metabolic process);GO:0006695(cholesterol biosynthetic process);GO:0006991(response to sterol depletion);GO:0008142(oxysterol binding);GO:0008202(steroid metabolic process);GO:0008203(cholesterol metabolic process);GO:0008289(lipid bi…	NA	NA	NA	insulin induced gene 1 [Source:HGNC Symbol;Acc:HGNC:6083]	protein_coding;retained_intron	DOID:4(disease);DOID:10534(stomach_cancer);DOID:0050828(artery_disease);DOID:4194(glucose_metabolism_disease);DOID:0014667(disease_of_metabolism);DOID:114(heart_disease);DOID:162(cancer);DOID:3393(coronary_artery_disease);DOID:3119(gastrointestinal_system_cancer);DOID:14566(disease_of_cellular_proliferation);DOID:1287(cardiovascular_system_disease);DOID:0060158(acquired_metabolic_disease);DOID:17…	R_HSA_8957322(Metabolism_of_steroids);R_HSA_1655829(Regulation_of_cholesterol_biosynthesis_by_SREBP_(SREBF));R_HSA_556833(Metabolism_of_lipids);R_HSA_1430728(Metabolism)	8.59572	9.4555	10.1737	44.6048	35.7953	33.5365	0.247725	-2.01319	3.0966e-36	3.09262e-33	down	yes
ENSG00000074855	ANO8	117112;117111;117114;117113	ENST00000159087;ENST00000597643;ENST00000600711;ENST00000630631	GO:0005229(intracellular calcium activated chloride channel activity);GO:0005788(endoplasmic reticulum lumen);GO:0005886(plasma membrane);GO:0006821(chloride transport);GO:0016020(membrane);GO:0016021(integral component of membrane);GO:0034220(ion transmembrane transport);GO:0043687(post-translational protein modification);GO:0044267(cellular protein metabolic process);GO:0055085(transmembrane tr…	NA	K19502	NA	anoctamin 8 [Source:HGNC Symbol;Acc:HGNC:29329]	protein_coding;nonsense_mediated_decay;retained_intron	NA	R_HSA_597592(Post_translational_protein_modification);R_HSA_382551(Transport_of_small_molecules);R_HSA_2672351(Stimuli_sensing_channels);R_HSA_392499(Metabolism_of_proteins);R_HSA_381426(Regulation_of_Insulin_like_Growth_Factor_(IGF)_transport_and_uptake_by_Insulin_like_Growth_Factor_Binding_Proteins_(IGFBPs));R_HSA_8957275(Post_translational_protein_phosphorylation);R_HSA_983712(Ion_channel_tran…	1.11385	1.18125	0.983431	5.40129	5.50134	4.48914	0.213006	-2.23104	3.71082e-36	3.6031e-33	down	yes
ENSG00000168488	ATXN2L	87859;87868;87864;87862;87869;87878;87860;87873;87863;87866;87874;87872;87881;87865;87871;87861;87867;87879;87882;87877;87883;87884;87870;87880;87885	ENST00000563314;ENST00000568266;ENST00000395547;ENST00000336783;ENST00000564656;ENST00000566946;ENST00000340394;ENST00000570284;ENST00000382686;ENST00000570200;ENST00000564284;ENST00000565971;ENST00000562686;ENST00000564304;ENST00000566080;ENST00000325215;ENST00000562867;ENST00000562583;ENST00000569318;ENST00000564035;ENST00000566007;ENST00000564162;ENST00000561539;ENST00000561732;ENST00000567024	GO:0003723(RNA binding);GO:0005515(protein binding);GO:0005634(nucleus);GO:0005737(cytoplasm);GO:0005829(cytosol);GO:0010494(cytoplasmic stress granule);GO:0010603(regulation of cytoplasmic mRNA processing body assembly);GO:0016020(membrane);GO:0016021(integral component of membrane);GO:0016607(nuclear speck);GO:0034063(stress granule assembly);GO:0045296(cadherin binding);GO:0045296(cadherin bin…	NA	NA	NA	ataxin 2 like [Source:HGNC Symbol;Acc:HGNC:31326]	retained_intron;protein_coding;processed_transcript;nonsense_mediated_decay	NA	NA	5.26606	6.77353	6.56065	29.1428	26.5536	21.1167	0.242149	-2.04603	2.02132e-35	1.9096e-32	down	yes
ENSG00000116260	QSOX1	23552;23554;23555	ENST00000367602;ENST00000367600;ENST00000443059	GO:0000139(Golgi membrane);GO:0002576(platelet degranulation);GO:0003756(protein disulfide isomerase activity);GO:0005576(extracellular region);GO:0005615(extracellular space);GO:0005788(endoplasmic reticulum lumen);GO:0005794(Golgi apparatus);GO:0006457(protein folding);GO:0016020(membrane);GO:0016021(integral component of membrane);GO:0016242(negative regulation of macroautophagy);GO:0016491(ox…	NA	NA	NA	quiescin sulfhydryl oxidase 1 [Source:HGNC Symbol;Acc:HGNC:9756]	protein_coding	DOID:4(disease);DOID:170(endocrine_gland_cancer);DOID:3498(pancreatic_ductal_adenocarcinoma);DOID:162(cancer);DOID:14566(disease_of_cellular_proliferation);DOID:4074(pancreas_adenocarcinoma);DOID:4905(pancreatic_carcinoma);DOID:1793(pancreatic_cancer);DOID:0050686(organ_system_cancer)	R_HSA_597592(Post_translational_protein_modification);R_HSA_76005(Response_to_elevated_platelet_cytosolic_Ca2+);R_HSA_168249(Innate_Immune_System);R_HSA_76002(Platelet_activation,_signaling_and_aggregation);R_HSA_168256(Immune_System);R_HSA_6798695(Neutrophil_degranulation);R_HSA_392499(Metabolism_of_proteins);R_HSA_381426(Regulation_of_Insulin_like_Growth_Factor_(IGF)_transport_and_uptake_by_Ins…	3.04529	2.83101	3.30221	12.0006	10.7686	9.20483	0.287061	-1.80057	4.51286e-34	4.15124e-31	down	yes
ENSG00000221890	NPTXR	154743	ENST00000333039	NA	NA	NA	NA	neuronal pentraxin receptor [Source:HGNC Symbol;Acc:HGNC:7954]	protein_coding	DOID:1307(dementia);DOID:4(disease);DOID:1289(neurodegenerative_disease);DOID:10652(Alzheimer's_disease);DOID:680(tauopathy);DOID:863(nervous_system_disease);DOID:331(central_nervous_system_disease);DOID:1561(cognitive_disorder);DOID:150(disease_of_mental_health);DOID:7(disease_of_anatomical_entity)	NA	2.00354	1.59209	2.06309	9.29579	9.04503	6.15937	0.230967	-2.11424	2.30508e-33	2.06601e-30	down	yes
ENSG00000087074	PPP1R15A	123004;123005	ENST00000200453;ENST00000600406	GO:0000164(protein phosphatase type 1 complex);GO:0005515(protein binding);GO:0005737(cytoplasm);GO:0005739(mitochondrion);GO:0005741(mitochondrial outer membrane);GO:0005783(endoplasmic reticulum);GO:0005789(endoplasmic reticulum membrane);GO:0005794(Golgi apparatus);GO:0005829(cytosol);GO:0006417(regulation of translation);GO:0006915(apoptotic process);GO:0006974(cellular response to DNA damage…	04141(Protein processing in endoplasmic reticulum);04141(Protein processing in endoplasmic reticulum)	K14019	NA	protein phosphatase 1 regulatory subunit 15A [Source:HGNC Symbol;Acc:HGNC:14375]	protein_coding	DOID:1176(bronchial_disease);DOID:630(genetic_disease);DOID:0050687(cell_type_cancer);DOID:850(lung_disease);DOID:4(disease);DOID:0050177(monogenic_disease);DOID:1579(respiratory_system_disease);DOID:0050736(autosomal_dominant_disease);DOID:0050739(autosomal_genetic_disease);DOID:13515(tuberous_sclerosis);DOID:162(cancer);DOID:1909(melanoma);DOID:14566(disease_of_cellular_proliferation);DOID:0050…	R_HSA_2262752(Cellular_responses_to_stress);R_HSA_2173788(Downregulation_of_TGF_beta_receptor_signaling);R_HSA_8953897(Cellular_responses_to_external_stimuli);R_HSA_2173789(TGF_beta_receptor_signaling_activates_SMADs);R_HSA_9648895(Response_of_EIF2AK1_(HRI)_to_heme_deficiency);R_HSA_9006936(Signaling_by_TGFB_family_members);R_HSA_162582(Signal_Transduction);R_HSA_170834(Signaling_by_TGF_beta_Rece…	6.51167	8.92874	7.41683	42.256	34.6361	27.7792	0.218371	-2.19514	2.85878e-33	2.49822e-30	down	yes
ENSG00000136068	FLNB	161552;161553;161551;161556;161560;161555;161559;161561;161550;161565;161557;161564;161558	ENST00000429972;ENST00000295956;ENST00000358537;ENST00000491408;ENST00000468939;ENST00000481470;ENST00000470231;ENST00000475487;ENST00000490882;ENST00000419752;ENST00000477629;ENST00000484981;ENST00000466455	GO:0001725(stress fiber);GO:0003334(keratinocyte development);GO:0003382(epithelial cell morphogenesis);GO:0003723(RNA binding);GO:0003779(actin binding);GO:0005515(protein binding);GO:0005634(nucleus);GO:0005737(cytoplasm);GO:0005829(cytosol);GO:0005856(cytoskeleton);GO:0005886(plasma membrane);GO:0005903(brush border);GO:0005925(focal adhesion);GO:0005938(cell cortex);GO:0007165(signal transduc…	04010(MAPK signaling pathway);04510(Focal adhesion);05132(Salmonella infection);05205(Proteoglycans in cancer);05205(Proteoglycans in cancer)	NA	NA	filamin B [Source:HGNC Symbol;Acc:HGNC:3755]	protein_coding;retained_intron;nonsense_mediated_decay;processed_transcript	DOID:225(syndrome);DOID:4(disease)	R_HSA_1280215(Cytokine_Signaling_in_Immune_system);R_HSA_1169410(Antiviral_mechanism_by_IFN_stimulated_genes);R_HSA_1169408(ISG15_antiviral_mechanism);R_HSA_168256(Immune_System);R_HSA_913531(Interferon_Signaling)	13.4586	14.0486	14.9932	50.2423	50.9684	36.9176	0.307688	-1.70046	3.21397e-33	2.7401e-30	down	yes
ENSG00000090863	GLG1	92513;92514;92519;92512;92515;92517;92524;92520;92525;92516;92523;92522;92526	ENST00000422840;ENST00000447066;ENST00000561481;ENST00000205061;ENST00000567951;ENST00000561942;ENST00000627032;ENST00000563646;ENST00000567911;ENST00000562090;ENST00000566601;ENST00000563432;ENST00000565474	GO:0000139(Golgi membrane);GO:0005102(signaling receptor binding);GO:0005737(cytoplasm);GO:0005794(Golgi apparatus);GO:0005856(cytoskeleton);GO:0005886(plasma membrane);GO:0010955(negative regulation of protein processing);GO:0016020(membrane);GO:0016021(integral component of membrane);GO:0017134(fibroblast growth factor binding);GO:0030054(cell junction);GO:0030512(negative regulation of transfo…	04514(Cell adhesion molecules (CAMs));04514(Cell adhesion molecules (CAMs))	NA	NA	golgi glycoprotein 1 [Source:HGNC Symbol;Acc:HGNC:4316]	protein_coding;retained_intron;nonsense_mediated_decay	NA	R_HSA_202733(Cell_surface_interactions_at_the_vascular_wall);R_HSA_109582(Hemostasis)	3.64642	4.09076	4.60794	15.1924	15.7966	12.0916	0.286559	-1.8031	2.35888e-32	1.9632e-29	down	yes
ENSG00000171298	GAA	106924;106923;106928;106927;106921;106926;106922;106929;106925	ENST00000390015;ENST00000577106;ENST00000570716;ENST00000572803;ENST00000570803;ENST00000572080;ENST00000302262;ENST00000573556;ENST00000574376	GO:0000023(maltose metabolic process);GO:0002026(regulation of the force of heart contraction);GO:0002086(diaphragm contraction);GO:0003007(heart morphogenesis);GO:0003824(catalytic activity);GO:0004553(hydrolase activity, hydrolyzing O-glycosyl compounds);GO:0004558(alpha-1,4-glucosidase activity);GO:0005764(lysosome);GO:0005765(lysosomal membrane);GO:0005886(plasma membrane);GO:0005975(carbohyd…	00052(Galactose metabolism);00500(Starch and sucrose metabolism);04142(Lysosome);04142(Lysosome)	NA	NA	glucosidase alpha, acid [Source:HGNC Symbol;Acc:HGNC:4065]	protein_coding;retained_intron;nonsense_mediated_decay;processed_transcript	NA	R_HSA_3229121(Glycogen_storage_diseases);R_HSA_5357609(Glycogen_storage_disease_type_II_(GAA));R_HSA_5663084(Diseases_of_carbohydrate_metabolism);R_HSA_168249(Innate_Immune_System);R_HSA_71387(Metabolism_of_carbohydrates);R_HSA_5668914(Diseases_of_metabolism);R_HSA_168256(Immune_System);R_HSA_8982491(Glycogen_metabolism);R_HSA_70221(Glycogen_breakdown_(glycogenolysis));R_HSA_6798695(Neutrophil_de…	6.13451	8.45885	7.62467	33.8653	33.8016	24.0893	0.242142	-2.04607	4.16007e-32	3.38175e-29	down	yes
ENSG00000142798	HSPG2	10714;10725;10715;10722;10718;10724;10721;10728;10720;10727;10717;10726;10723;10716;10719	ENST00000374695;ENST00000480900;ENST00000486901;ENST00000644714;ENST00000471322;ENST00000498495;ENST00000493940;ENST00000439717;ENST00000453796;ENST00000374673;ENST00000635682;ENST00000412328;ENST00000427897;ENST00000481644;ENST00000374676	GO:0001523(retinoid metabolic process);GO:0001525(angiogenesis);GO:0001540(amyloid-beta binding);GO:0005509(calcium ion binding);GO:0005515(protein binding);GO:0005576(extracellular region);GO:0005604(basement membrane);GO:0005615(extracellular space);GO:0005796(Golgi lumen);GO:0005886(plasma membrane);GO:0005925(focal adhesion);GO:0006024(glycosaminoglycan biosynthetic process);GO:0006027(glycos…	04512(ECM-receptor interaction);05161(Hepatitis B);05205(Proteoglycans in cancer);05205(Proteoglycans in cancer)	NA	NA	heparan sulfate proteoglycan 2 [Source:HGNC Symbol;Acc:HGNC:5273]	protein_coding;retained_intron;processed_transcript;non_stop_decay	DOID:1307(dementia);DOID:3086(gingival_overgrowth);DOID:17(musculoskeletal_system_disease);DOID:225(syndrome);DOID:913(atrophic_muscular_disease);DOID:4(disease);DOID:4195(hyperglycemia);DOID:0050828(artery_disease);DOID:450(myotonic_disease);DOID:1289(neurodegenerative_disease);DOID:440(neuromuscular_disease);DOID:77(gastrointestinal_system_disease);DOID:2349(arteriosclerosis);DOID:4194(glucose_…	R_HSA_196854(Metabolism_of_vitamins_and_cofactors);R_HSA_3781865(Diseases_of_glycosylation);R_HSA_1474244(Extracellular_matrix_organization);R_HSA_2187338(Visual_phototransduction);R_HSA_9709957(Sensory_Perception);R_HSA_71387(Metabolism_of_carbohydrates);R_HSA_1971475(A_tetrasaccharide_linker_sequence_is_required_for_GAG_synthesis);R_HSA_5668914(Diseases_of_metabolism);R_HSA_1630316(Glycosaminog…	3.48025	3.68691	2.49758	16.0415	15.5523	10.7927	0.228015	-2.1328	4.35285e-32	3.45804e-29	down	yes
ENSG00000074181	NOTCH3	116494;116497;116499;116496;116498	ENST00000263388;ENST00000601011;ENST00000595045;ENST00000597756;ENST00000600841	GO:0000122(negative regulation of transcription by RNA polymerase II);GO:0000139(Golgi membrane);GO:0005509(calcium ion binding);GO:0005515(protein binding);GO:0005576(extracellular region);GO:0005634(nucleus);GO:0005654(nucleoplasm);GO:0005789(endoplasmic reticulum membrane);GO:0005829(cytosol);GO:0005886(plasma membrane);GO:0006355(regulation of transcription, DNA-templated);GO:0006367(transcri…	01522(Endocrine resistance);04330(Notch signaling pathway);04371(Apelin signaling pathway);04658(Th1 and Th2 cell differentiation);04919(Thyroid hormone signaling pathway);05165(Human papillomavirus infection);05200(Pathways in cancer);05206(MicroRNAs in cancer);05224(Breast cancer);05224(Breast cancer)	K20995	NA	notch receptor 3 [Source:HGNC Symbol;Acc:HGNC:7883]	protein_coding;retained_intron	DOID:1510(personality_disorder);DOID:684(hepatocellular_carcinoma);DOID:3996(urinary_system_cancer);DOID:2394(ovarian_cancer);DOID:1240(leukemia);DOID:1612(breast_cancer);DOID:2531(hematologic_cancer);DOID:3111(cystadenocarcinoma);DOID:0050687(cell_type_cancer);DOID:936(brain_disease);DOID:3571(liver_cancer);DOID:1037(lymphoblastic_leukemia);DOID:4(disease);DOID:10579(leukodystrophy);DOID:0050828…	R_HSA_212436(Generic_Transcription_Pathway);R_HSA_3781865(Diseases_of_glycosylation);R_HSA_157118(Signaling_by_NOTCH);R_HSA_9013508(NOTCH3_Intracellular_Domain_Regulates_Transcription);R_HSA_9013507(NOTCH3_Activation_and_Transmission_of_Signal_to_the_Nucleus);R_HSA_1912408(Pre_NOTCH_Transcription_and_Translation);R_HSA_74160(Gene_expression_(Transcription));R_HSA_5668914(Diseases_of_metabolism);R…	1.54814	1.25555	2.13183	9.06678	9.19694	6.33799	0.200617	-2.31748	7.55964e-32	5.87216e-29	down	yes
ENSG00000078804	TP53INP2	145183;145182;145185	ENST00000374810;ENST00000374809;ENST00000414082	GO:0000045(autophagosome assembly);GO:0001649(osteoblast differentiation);GO:0001894(tissue homeostasis);GO:0005515(protein binding);GO:0005634(nucleus);GO:0005737(cytoplasm);GO:0005776(autophagosome);GO:0005829(cytosol);GO:0006511(ubiquitin-dependent protein catabolic process);GO:0006914(autophagy);GO:0010508(positive regulation of autophagy);GO:0016236(macroautophagy);GO:0016605(PML body);GO:00…	04140(Autophagy - animal);04140(Autophagy - animal)	K21247	NA	tumor protein p53 inducible nuclear protein 2 [Source:HGNC Symbol;Acc:HGNC:16104]	protein_coding	NA	NA	1.78026	1.90964	2.24808	8.75787	8.46396	6.93108	0.245849	-2.02415	1.51302e-31	1.14973e-28	down	yes
ENSG00000171603	CLSTN1	9472;9471;9468;9470;9469;9473	ENST00000361311;ENST00000435891;ENST00000377298;ENST00000477264;ENST00000650348;ENST00000464286	GO:0000139(Golgi membrane);GO:0001540(amyloid-beta binding);GO:0001558(regulation of cell growth);GO:0005509(calcium ion binding);GO:0005515(protein binding);GO:0005576(extracellular region);GO:0005634(nucleus);GO:0005783(endoplasmic reticulum);GO:0005789(endoplasmic reticulum membrane);GO:0005794(Golgi apparatus);GO:0005886(plasma membrane);GO:0007155(cell adhesion);GO:0007156(homophilic cell ad…	NA	K22659	NA	calsyntenin 1 [Source:HGNC Symbol;Acc:HGNC:17447]	protein_coding;processed_transcript;nonsense_mediated_decay	NA	NA	5.51762	6.44596	8.97277	34.6584	35.0671	26.1207	0.218437	-2.19471	2.12425e-31	1.57986e-28	down	yes
ENSG00000153815	CMIP	93122;93137;93141;93129;93125;93136;93128;93140;93130;93138;93139	ENST00000537098;ENST00000566462;ENST00000561605;ENST00000565029;ENST00000539778;ENST00000564666;ENST00000621537;ENST00000623842;ENST00000566513;ENST00000565680;ENST00000569146	GO:0005515(protein binding);GO:0005634(nucleus);GO:0005654(nucleoplasm);GO:0005737(cytoplasm);GO:0005829(cytosol);GO:0005829(cytosol)	NA	NA	NA	c-Maf inducing protein [Source:HGNC Symbol;Acc:HGNC:24319]	protein_coding;retained_intron;processed_transcript;TEC	NA	NA	4.14147	5.10341	5.46291	18.4194	19.218	15.1902	0.278411	-1.84471	2.99101e-31	2.17814e-28	down	yes
ENSG00000179820	MYADM	124669;124668;124671;124670;124662;124666;124663;124664;124672;124665	ENST00000391770;ENST00000391771;ENST00000391768;ENST00000391769;ENST00000422045;ENST00000448420;ENST00000336967;ENST00000421337;ENST00000414489;ENST00000651087	GO:0001726(ruffle);GO:0001933(negative regulation of protein phosphorylation);GO:0003674(molecular_function);GO:0005515(protein binding);GO:0005886(plasma membrane);GO:0005911(cell-cell junction);GO:0010629(negative regulation of gene expression);GO:0016020(membrane);GO:0016021(integral component of membrane);GO:0030335(positive regulation of cell migration);GO:0030837(negative regulation of acti…	NA	NA	NA	myeloid associated differentiation marker [Source:HGNC Symbol;Acc:HGNC:7544]	protein_coding;processed_transcript	NA	NA	7.90415	10.0681	11.0926	40.4159	40.0557	31.8308	0.258809	-1.95004	4.7974e-31	3.42231e-28	down	yes
ENSG00000070444	MNT	94932;94938;94939;94935;94936;94937;94941;94934	ENST00000174618;ENST00000575394;ENST00000575402;ENST00000572892;ENST00000571232;ENST00000573384;ENST00000571836;ENST00000575374	GO:0000122(negative regulation of transcription by RNA polymerase II);GO:0000790(nuclear chromatin);GO:0000977(RNA polymerase II regulatory region sequence-specific DNA binding);GO:0000981(DNA-binding transcription factor activity, RNA polymerase II-specific);GO:0001227(DNA-binding transcription repressor activity, RNA polymerase II-specific);GO:0003677(DNA binding);GO:0003682(chromatin binding);…	NA	K09115	NA	MAX network transcriptional repressor [Source:HGNC Symbol;Acc:HGNC:7188]	protein_coding;retained_intron;processed_transcript	DOID:1240(leukemia);DOID:2531(hematologic_cancer);DOID:12603(acute_leukemia);DOID:4(disease);DOID:162(cancer);DOID:14566(disease_of_cellular_proliferation);DOID:0060083(immune_system_cancer);DOID:0050686(organ_system_cancer)	NA	1.43468	1.55665	1.75669	6.76567	6.44662	4.81587	0.263367	-1.92485	6.89953e-31	4.82346e-28	down	yes
ENSG00000161642	ZNF385A	55289;55292;55287;55291;55290;55288;55298;55295;55296;55299;55293	ENST00000550779;ENST00000552382;ENST00000352268;ENST00000546970;ENST00000338010;ENST00000394313;ENST00000550774;ENST00000549937;ENST00000549962;ENST00000550120;ENST00000551771	GO:0000790(nuclear chromatin);GO:0002039(p53 binding);GO:0003676(nucleic acid binding);GO:0003677(DNA binding);GO:0003723(RNA binding);GO:0003730(mRNA 3'-UTR binding);GO:0005634(nucleus);GO:0005654(nucleoplasm);GO:0005730(nucleolus);GO:0005737(cytoplasm);GO:0006417(regulation of translation);GO:0006915(apoptotic process);GO:0006974(cellular response to DNA damage stimulus);GO:0006977(DNA damage r…	NA	NA	NA	zinc finger protein 385A [Source:HGNC Symbol;Acc:HGNC:17521]	nonsense_mediated_decay;processed_transcript;protein_coding	NA	R_HSA_212436(Generic_Transcription_Pathway);R_HSA_6804114(TP53_Regulates_Transcription_of_Genes_Involved_in_G2_Cell_Cycle_Arrest);R_HSA_69580(p53_Dependent_G1/S_DNA_damage_checkpoint);R_HSA_69620(Cell_Cycle_Checkpoints);R_HSA_69615(G1/S_DNA_Damage_Checkpoints);R_HSA_69895(Transcriptional__activation_of__cell_cycle_inhibitor_p21);R_HSA_6791312(TP53_Regulates_Transcription_of_Cell_Cycle_Genes);R_HS…	2.47177	2.82663	2.8513	12.0445	11.2823	8.82642	0.253465	-1.98014	8.19664e-31	5.61791e-28	down	yes
ENSG00000187720	THSD4	80045;80050;80063;80068;80067	ENST00000355327;ENST00000620694;ENST00000567745;ENST00000567776;ENST00000567838	GO:0001527(microfibril);GO:0004222(metalloendopeptidase activity);GO:0005201(extracellular matrix structural constituent);GO:0005576(extracellular region);GO:0006508(proteolysis);GO:0008233(peptidase activity);GO:0016787(hydrolase activity);GO:0030198(extracellular matrix organization);GO:0031012(extracellular matrix);GO:0048251(elastic fiber assembly);GO:0062023(collagen-containing extracellular…	NA	NA	NA	thrombospondin type 1 domain containing 4 [Source:HGNC Symbol;Acc:HGNC:25835]	protein_coding;retained_intron;processed_transcript	DOID:0080001(bone_disease);DOID:17(musculoskeletal_system_disease);DOID:0080011(bone_resorption_disease);DOID:4(disease);DOID:0080005(bone_remodeling_disease);DOID:11476(osteoporosis);DOID:7(disease_of_anatomical_entity)	R_HSA_3781865(Diseases_of_glycosylation);R_HSA_597592(Post_translational_protein_modification);R_HSA_5173214(O_glycosylation_of_TSR_domain_containing_proteins);R_HSA_5173105(O_linked_glycosylation);R_HSA_5668914(Diseases_of_metabolism);R_HSA_3906995(Diseases_associated_with_O_glycosylation_of_proteins);R_HSA_5083635(Defective_B3GALTL_causes_Peters_plus_syndrome_(PpS));R_HSA_392499(Metabolism_of_p…	9.61233	11.2862	7.9662	38.7433	39.0674	30.1784	0.267293	-1.9035	1.02298e-30	6.87662e-28	down	yes
ENSG00000131746	TNS4	100574;100573;100576;100575	ENST00000254051;ENST00000394072;ENST00000497303;ENST00000582747	GO:0003779(actin binding);GO:0005515(protein binding);GO:0005737(cytoplasm);GO:0005829(cytosol);GO:0005856(cytoskeleton);GO:0005925(focal adhesion);GO:0006915(apoptotic process);GO:0008104(protein localization);GO:0030054(cell junction);GO:0030054(cell junction)	NA	K18080	NA	tensin 4 [Source:HGNC Symbol;Acc:HGNC:24352]	protein_coding;retained_intron	DOID:1612(breast_cancer);DOID:3275(thymoma);DOID:3277(thymus_cancer);DOID:4(disease);DOID:3459(breast_carcinoma);DOID:162(cancer);DOID:14566(disease_of_cellular_proliferation);DOID:5093(thoracic_cancer);DOID:0060083(immune_system_cancer);DOID:0050686(organ_system_cancer)	R_HSA_6806834(Signaling_by_MET);R_HSA_162582(Signal_Transduction);R_HSA_8875513(MET_interacts_with_TNS_proteins);R_HSA_8875878(MET_promotes_cell_motility);R_HSA_9006934(Signaling_by_Receptor_Tyrosine_Kinases)	12.8949	14.8364	11.8433	48.8952	55.3234	37.0121	0.280212	-1.83541	3.80963e-30	2.51256e-27	down	yes
ENSG00000132510	KDM6B	96305;96307;96306;96308;96309	ENST00000254846;ENST00000572030;ENST00000448097;ENST00000575521;ENST00000570632	GO:0000790(nuclear chromatin);GO:0000978(RNA polymerase II cis-regulatory region sequence-specific DNA binding);GO:0002437(inflammatory response to antigenic stimulus);GO:0003682(chromatin binding);GO:0005515(protein binding);GO:0005634(nucleus);GO:0005654(nucleoplasm);GO:0006325(chromatin organization);GO:0006338(chromatin remodeling);GO:0006954(inflammatory response);GO:0008013(beta-catenin bin…	NA	K11448	EC:1.14.11.-	lysine demethylase 6B [Source:HGNC Symbol;Acc:HGNC:29012]	protein_coding;processed_transcript	DOID:4(disease);DOID:162(cancer);DOID:14566(disease_of_cellular_proliferation)	R_HSA_2262752(Cellular_responses_to_stress);R_HSA_8953897(Cellular_responses_to_external_stimuli);R_HSA_2559583(Cellular_Senescence);R_HSA_3214842(HDMs_demethylate_histones);R_HSA_2559580(Oxidative_Stress_Induced_Senescence);R_HSA_4839726(Chromatin_organization);R_HSA_3247509(Chromatin_modifying_enzymes)	1.58	1.67489	1.82468	6.96504	6.55163	5.00742	0.274215	-1.86662	4.43981e-30	2.87395e-27	down	yes
ENSG00000198517	MAFK	201580;201581;201582	ENST00000343242;ENST00000403150;ENST00000406174	GO:0000122(negative regulation of transcription by RNA polymerase II);GO:0000790(nuclear chromatin);GO:0000976(transcription regulatory region sequence-specific DNA binding);GO:0000978(RNA polymerase II cis-regulatory region sequence-specific DNA binding);GO:0000981(DNA-binding transcription factor activity, RNA polymerase II-specific);GO:0001221(transcription cofactor binding);GO:0001227(DNA-bin…	NA	NA	NA	MAF bZIP transcription factor K [Source:HGNC Symbol;Acc:HGNC:6782]	protein_coding;nonsense_mediated_decay	NA	R_HSA_9707587(Regulation_of_HMOX1_expression_and_activity);R_HSA_2262752(Cellular_responses_to_stress);R_HSA_9707564(Cytoprotection_by_HMOX1);R_HSA_8953897(Cellular_responses_to_external_stimuli);R_HSA_9711123(Cellular_response_to_chemical_stress);R_HSA_9708530(Regulation_of_BACH1_activity);R_HSA_983231(Factors_involved_in_megakaryocyte_development_and_platelet_production);R_HSA_9707616(Heme_sign…	15.0425	15.4751	11.8536	57.3437	52.1118	41.4035	0.280867	-1.83204	5.12826e-30	3.25924e-27	down	yes
ENSG00000125844	RRBP1	143922;143925;143919;143929;143928;143920;143923	ENST00000246043;ENST00000377813;ENST00000468428;ENST00000398782;ENST00000620641;ENST00000470422;ENST00000377807	GO:0001649(osteoblast differentiation);GO:0003723(RNA binding);GO:0005783(endoplasmic reticulum);GO:0005789(endoplasmic reticulum membrane);GO:0005840(ribosome);GO:0006412(translation);GO:0015031(protein transport);GO:0016020(membrane);GO:0016021(integral component of membrane);GO:0030176(integral component of endoplasmic reticulum membrane);GO:0038023(signaling receptor activity);GO:0038023(sign…	04141(Protein processing in endoplasmic reticulum);04141(Protein processing in endoplasmic reticulum)	K14000	NA	ribosome binding protein 1 [Source:HGNC Symbol;Acc:HGNC:10448]	protein_coding;retained_intron	DOID:4(disease);DOID:162(cancer);DOID:14566(disease_of_cellular_proliferation)	NA	8.88028	9.69084	12.4803	39.0627	39.3365	33.4841	0.277534	-1.84926	1.26798e-29	7.91466e-27	down	yes
ENSG00000198911	SREBF2	155156;155157;155163;155161;155162;155158;155159;155164;155160	ENST00000612482;ENST00000361204;ENST00000435061;ENST00000491541;ENST00000463741;ENST00000424354;ENST00000462539;ENST00000490262;ENST00000464119	GO:0000122(negative regulation of transcription by RNA polymerase II);GO:0000139(Golgi membrane);GO:0000790(nuclear chromatin);GO:0000976(transcription regulatory region sequence-specific DNA binding);GO:0000978(RNA polymerase II cis-regulatory region sequence-specific DNA binding);GO:0000981(DNA-binding transcription factor activity, RNA polymerase II-specific);GO:0001227(DNA-binding transcripti…	NA	K09107	NA	sterol regulatory element binding transcription factor 2 [Source:HGNC Symbol;Acc:HGNC:11290]	protein_coding;processed_transcript;retained_intron;nonsense_mediated_decay	DOID:18(urinary_system_disease);DOID:1307(dementia);DOID:3405(histiocytosis);DOID:225(syndrome);DOID:4(disease);DOID:5419(schizophrenia);DOID:75(lymphatic_system_disease);DOID:0050828(artery_disease);DOID:409(liver_disease);DOID:77(gastrointestinal_system_disease);DOID:2349(arteriosclerosis);DOID:5844(myocardial_infarction);DOID:9455(lipid_storage_disease);DOID:557(kidney_disease);DOID:0014667(di…	R_HSA_9619665(EGR2_and_SOX10_mediated_initiation_of_Schwann_cell_myelination);R_HSA_8957322(Metabolism_of_steroids);R_HSA_1655829(Regulation_of_cholesterol_biosynthesis_by_SREBP_(SREBF));R_HSA_400206(Regulation_of_lipid_metabolism_by_PPARalpha);R_HSA_1266738(Developmental_Biology);R_HSA_2426168(Activation_of_gene_expression_by_SREBF_(SREBP));R_HSA_9675108(Nervous_system_development);R_HSA_1989781…	6.47351	7.05881	6.92463	24.9199	23.1749	17.5186	0.31178	-1.6814	1.39635e-29	8.56307e-27	down	yes
ENSG00000169710	FASN	107642;107644;107649;107645;107654;107647;107648;107652;107651;107650;107653;107646	ENST00000306749;ENST00000584610;ENST00000635197;ENST00000578424;ENST00000637693;ENST00000636628;ENST00000579410;ENST00000635733;ENST00000637026;ENST00000637525;ENST00000636968;ENST00000580382	GO:0001649(osteoblast differentiation);GO:0003723(RNA binding);GO:0003824(catalytic activity);GO:0004312(fatty acid synthase activity);GO:0004313([acyl-carrier-protein] S-acetyltransferase activity);GO:0004314([acyl-carrier-protein] S-malonyltransferase activity);GO:0004315(3-oxoacyl-[acyl-carrier-protein] synthase activity);GO:0004316(3-oxoacyl-[acyl-carrier-protein] reductase (NADPH) activity);…	00061(Fatty acid biosynthesis);04152(AMPK signaling pathway);04910(Insulin signaling pathway);04910(Insulin signaling pathway)	NA	NA	fatty acid synthase [Source:HGNC Symbol;Acc:HGNC:3594]	protein_coding;retained_intron;processed_transcript;nonsense_mediated_decay	DOID:934(viral_infectious_disease);DOID:1612(breast_cancer);DOID:3458(breast_adenocarcinoma);DOID:654(overnutrition);DOID:3620(central_nervous_system_cancer);DOID:630(genetic_disease);DOID:0050687(cell_type_cancer);DOID:0050117(disease_by_infectious_agent);DOID:4(disease);DOID:0050177(monogenic_disease);DOID:4195(hyperglycemia);DOID:1749(squamous_cell_carcinoma);DOID:409(liver_disease);DOID:77(ga…	R_HSA_196854(Metabolism_of_vitamins_and_cofactors);R_HSA_163685(Integration_of_energy_metabolism);R_HSA_9006931(Signaling_by_Nuclear_Receptors);R_HSA_8957322(Metabolism_of_steroids);R_HSA_75105(Fatty_acyl_CoA_biosynthesis);R_HSA_9024446(NR1H2_and_NR1H3_mediated_signaling);R_HSA_8978868(Fatty_acid_metabolism);R_HSA_1655829(Regulation_of_cholesterol_biosynthesis_by_SREBP_(SREBF));R_HSA_196849(Metab…	5.13072	4.57909	8.53445	36.8762	34.5748	24.5258	0.190091	-2.39524	2.04895e-29	1.23484e-26	down	yes
ENSG00000143512	HHIPL2	26101;26103;26102;26100	ENST00000343410;ENST00000494899;ENST00000468172;ENST00000473144	GO:0003824(catalytic activity);GO:0005515(protein binding);GO:0005576(extracellular region);GO:0005576(extracellular region)	NA	NA	NA	HHIP like 2 [Source:HGNC Symbol;Acc:HGNC:25842]	protein_coding;processed_transcript	NA	NA	2.13302	2.1801	2.46513	8.59601	9.60444	7.45281	0.264226	-1.92016	3.57325e-29	2.117e-26	down	yes
ENSG00000142627	EPHA2	10159;10156;10157;10158	ENST00000461614;ENST00000358432;ENST00000462805;ENST00000480202	GO:0000166(nucleotide binding);GO:0001501(skeletal system development);GO:0001525(angiogenesis);GO:0001568(blood vessel development);GO:0001570(vasculogenesis);GO:0001618(virus receptor activity);GO:0001649(osteoblast differentiation);GO:0001818(negative regulation of cytokine production);GO:0002043(blood vessel endothelial cell proliferation involved in sprouting angiogenesis);GO:0004672(protein…	04010(MAPK signaling pathway);04014(Ras signaling pathway);04015(Rap1 signaling pathway);04151(PI3K-Akt signaling pathway);04360(Axon guidance);04360(Axon guidance)	K05103	EC:2.7.10.1	EPH receptor A2 [Source:HGNC Symbol;Acc:HGNC:3386]	processed_transcript;protein_coding	DOID:3996(urinary_system_cancer);DOID:10286(prostate_carcinoma);DOID:1240(leukemia);DOID:2531(hematologic_cancer);DOID:1324(lung_cancer);DOID:0050687(cell_type_cancer);DOID:1037(lymphoblastic_leukemia);DOID:4(disease);DOID:10534(stomach_cancer);DOID:1749(squamous_cell_carcinoma);DOID:1192(peripheral_nervous_system_neoplasm);DOID:3856(male_reproductive_organ_cancer);DOID:170(endocrine_gland_cancer…	R_HSA_194315(Signaling_by_Rho_GTPases);R_HSA_9012999(RHO_GTPase_cycle);R_HSA_9013149(RAC1_GTPase_cycle);R_HSA_9716542(Signaling_by_Rho_GTPases,_Miro_GTPases_and_RHOBTB3);R_HSA_9013423(RAC3_GTPase_cycle);R_HSA_9013408(RHOG_GTPase_cycle);R_HSA_9013424(RHOV_GTPase_cycle);R_HSA_1266738(Developmental_Biology);R_HSA_3928665(EPH_ephrin_mediated_repulsion_of_cells);R_HSA_2682334(EPH_Ephrin_signaling);R_H…	8.84996	13.6318	11.8033	53.3059	50.3952	39.1905	0.239937	-2.05927	6.8554e-29	3.99384e-26	down	yes
ENSG00000128016	ZFP36	120523;120522;120521;120525;120524	ENST00000594045;ENST00000594442;ENST00000597629;ENST00000600033;ENST00000652583	GO:0000122(negative regulation of transcription by RNA polymerase II);GO:0000165(MAPK cascade);GO:0000288(nuclear-transcribed mRNA catabolic process, deadenylation-dependent decay);GO:0000289(nuclear-transcribed mRNA poly(A) tail shortening);GO:0000932(P-body);GO:0003677(DNA binding);GO:0003723(RNA binding);GO:0003729(mRNA binding);GO:0005515(protein binding);GO:0005634(nucleus);GO:0005737(cytopl…	05166(Human T-cell leukemia virus 1 infection);05167(Kaposi sarcoma-associated herpesvirus infection);05167(Kaposi sarcoma-associated herpesvirus infection)	K15308	NA	ZFP36 ring finger protein [Source:HGNC Symbol;Acc:HGNC:12862]	protein_coding;processed_transcript	DOID:0080001(bone_disease);DOID:17(musculoskeletal_system_disease);DOID:630(genetic_disease);DOID:4(disease);DOID:0050177(monogenic_disease);DOID:1485(cystic_fibrosis);DOID:4194(glucose_metabolism_disease);DOID:0050739(autosomal_genetic_disease);DOID:0050737(autosomal_recessive_disease);DOID:0014667(disease_of_metabolism);DOID:848(arthritis);DOID:162(cancer);DOID:14566(disease_of_cellular_prolife…	R_HSA_450531(Regulation_of_mRNA_stability_by_proteins_that_bind_AU_rich_elements);R_HSA_450513(Tristetraprolin_(TTP,_ZFP36)_binds_and_destabilizes_mRNA);R_HSA_8953854(Metabolism_of_RNA)	4.42004	7.55315	6.28477	38.9818	35.4095	23.7421	0.186053	-2.42622	7.08415e-29	4.05945e-26	down	yes
ENSG00000076108	BAZ2A	55982;55985;55989;55995;55983;55990;55984;55993;55996;55991;55992;55998;55987;55994;55997;55986;55988	ENST00000379441;ENST00000549884;ENST00000549763;ENST00000551959;ENST00000551812;ENST00000548578;ENST00000549787;ENST00000549327;ENST00000546695;ENST00000547650;ENST00000551996;ENST00000550730;ENST00000547453;ENST00000547647;ENST00000549506;ENST00000553222;ENST00000551759	GO:0000183(chromatin silencing at rDNA);GO:0001164(RNA polymerase I core promoter sequence-specific DNA binding);GO:0001188(RNA polymerase I preinitiation complex assembly);GO:0003677(DNA binding);GO:0003723(RNA binding);GO:0005515(protein binding);GO:0005634(nucleus);GO:0005677(chromatin silencing complex);GO:0005730(nucleolus);GO:0005829(cytosol);GO:0006306(DNA methylation);GO:0006325(chromatin…	NA	K15224	NA	bromodomain adjacent to zinc finger domain 2A [Source:HGNC Symbol;Acc:HGNC:962]	protein_coding;processed_transcript;retained_intron	NA	R_HSA_74160(Gene_expression_(Transcription));R_HSA_427413(NoRC_negatively_regulates_rRNA_expression);R_HSA_5250941(Negative_epigenetic_regulation_of_rRNA_expression);R_HSA_212165(Epigenetic_regulation_of_gene_expression)	5.43137	5.81772	6.88245	21.63	21.3472	16.3298	0.305723	-1.7097	7.64383e-29	4.30952e-26	down	yes
ENSG00000110651	CD81	36814;36818;36825;36826;36828;36827;36824;36823;36812;36819;36821;36822;36813;36816;36815;36820	ENST00000263645;ENST00000464784;ENST00000531840;ENST00000481687;ENST00000481386;ENST00000468153;ENST00000530239;ENST00000524805;ENST00000475945;ENST00000493525;ENST00000492252;ENST00000526072;ENST00000530648;ENST00000492627;ENST00000533417;ENST00000381036	GO:0000187(activation of MAPK activity);GO:0001618(virus receptor activity);GO:0001771(immunological synapse formation);GO:0001772(immunological synapse);GO:0002250(adaptive immune response);GO:0002376(immune system process);GO:0002455(humoral immune response mediated by circulating immunoglobulin);GO:0002863(positive regulation of inflammatory response to antigenic stimulus);GO:0005178(integrin …	04662(B cell receptor signaling pathway);05144(Malaria);05160(Hepatitis C);05160(Hepatitis C)	NA	NA	CD81 molecule [Source:HGNC Symbol;Acc:HGNC:1701]	protein_coding;retained_intron;processed_transcript	DOID:684(hepatocellular_carcinoma);DOID:1240(leukemia);DOID:934(viral_infectious_disease);DOID:2531(hematologic_cancer);DOID:3571(liver_cancer);DOID:1037(lymphoblastic_leukemia);DOID:0050117(disease_by_infectious_agent);DOID:4(disease);DOID:409(liver_disease);DOID:77(gastrointestinal_system_disease);DOID:1883(hepatitis_C);DOID:162(cancer);DOID:3119(gastrointestinal_system_cancer);DOID:14566(disea…	R_HSA_166658(Complement_cascade);R_HSA_168249(Innate_Immune_System);R_HSA_198933(Immunoregulatory_interactions_between_a_Lymphoid_and_a_non_Lymphoid_cell);R_HSA_168256(Immune_System);R_HSA_1280218(Adaptive_Immune_System);R_HSA_977606(Regulation_of_Complement_cascade)	8.18953	7.05888	9.39308	30.4356	29.2022	22.0809	0.30154	-1.72958	7.85008e-29	4.35555e-26	down	yes
ENSG00000184347	SLIT3	189284;189283;189290;189292;189307;189293	ENST00000519560;ENST00000404867;ENST00000519486;ENST00000518140;ENST00000521130;ENST00000521150	GO:0003180(aortic valve morphogenesis);GO:0003181(atrioventricular valve morphogenesis);GO:0005509(calcium ion binding);GO:0005515(protein binding);GO:0005576(extracellular region);GO:0005615(extracellular space);GO:0005739(mitochondrion);GO:0007275(multicellular organism development);GO:0007399(nervous system development);GO:0007411(axon guidance);GO:0008201(heparin binding);GO:0008285(negative …	04360(Axon guidance);04360(Axon guidance)	K06850	NA	slit guidance ligand 3 [Source:HGNC Symbol;Acc:HGNC:11087]	protein_coding;retained_intron;processed_transcript	DOID:0080001(bone_disease);DOID:17(musculoskeletal_system_disease);DOID:4(disease);DOID:5419(schizophrenia);DOID:848(arthritis);DOID:162(cancer);DOID:2468(psychotic_disorder);DOID:14566(disease_of_cellular_proliferation);DOID:3342(bone_inflammation_disease);DOID:7148(rheumatoid_arthritis);DOID:1561(cognitive_disorder);DOID:150(disease_of_mental_health);DOID:7(disease_of_anatomical_entity)	R_HSA_428542(Regulation_of_commissural_axon_pathfinding_by_SLIT_and_ROBO);R_HSA_1266738(Developmental_Biology);R_HSA_376176(Signaling_by_ROBO_receptors);R_HSA_373752(Netrin_1_signaling);R_HSA_9675108(Nervous_system_development);R_HSA_422475(Axon_guidance)	0.82106	1.118	1.22034	5.04742	4.7884	3.59736	0.235193	-2.08808	1.34269e-28	7.33342e-26	down	yes
ENSG00000142192	APP	149183;149190;149200;149202;149189;149201;149207;149185;149204;149187;149184;149206;149186	ENST00000348990;ENST00000358918;ENST00000448850;ENST00000491395;ENST00000464867;ENST00000415997;ENST00000466453;ENST00000357903;ENST00000463070;ENST00000440126;ENST00000346798;ENST00000462267;ENST00000359726	GO:0000978(RNA polymerase II cis-regulatory region sequence-specific DNA binding);GO:0001774(microglial cell activation);GO:0001934(positive regulation of protein phosphorylation);GO:0001967(suckling behavior);GO:0002265(astrocyte activation involved in immune response);GO:0002576(platelet degranulation);GO:0003677(DNA binding);GO:0004867(serine-type endopeptidase inhibitor activity);GO:0005102(s…	04726(Serotonergic synapse);05010(Alzheimer disease);05010(Alzheimer disease)	NA	NA	amyloid beta precursor protein [Source:HGNC Symbol;Acc:HGNC:620]	protein_coding;processed_transcript;retained_intron	DOID:230(lateral_sclerosis);DOID:1307(dementia);DOID:1240(leukemia);DOID:934(viral_infectious_disease);DOID:2531(hematologic_cancer);DOID:12217(Lewy_body_dementia);DOID:654(overnutrition);DOID:17(musculoskeletal_system_disease);DOID:3620(central_nervous_system_cancer);DOID:630(genetic_disease);DOID:225(syndrome);DOID:0050687(cell_type_cancer);DOID:936(brain_disease);DOID:0050117(disease_by_infect…	R_HSA_375276(Peptide_ligand_binding_receptors);R_HSA_975138(TRAF6_mediated_induction_of_NFkB_and_MAP_kinases_upon_TLR7/8_or_9_activation);R_HSA_444473(Formyl_peptide_receptors_bind_formyl_peptides_and_many_other_ligands);R_HSA_9645723(Diseases_of_programmed_cell_death);R_HSA_8863678(Neurodegenerative_Diseases);R_HSA_597592(Post_translational_protein_modification);R_HSA_1474244(Extracellular_matri…	79.6055	97.1867	79.4272	287.72	280.994	243.674	0.31539	-1.66479	2.40834e-28	1.29513e-25	down	yes
ENSG00000188064	WNT7B	155616;155619;155617;155618;155620	ENST00000339464;ENST00000410058;ENST00000409496;ENST00000410089;ENST00000428540	GO:0001701(in utero embryonic development);GO:0003338(metanephros morphogenesis);GO:0005102(signaling receptor binding);GO:0005109(frizzled binding);GO:0005125(cytokine activity);GO:0005515(protein binding);GO:0005576(extracellular region);GO:0005615(extracellular space);GO:0005737(cytoplasm);GO:0005788(endoplasmic reticulum lumen);GO:0005796(Golgi lumen);GO:0005886(plasma membrane);GO:0007257(ac…	04150(mTOR signaling pathway);04310(Wnt signaling pathway);04390(Hippo signaling pathway);04550(Signaling pathways regulating pluripotency of stem cells);04916(Melanogenesis);04934(Cushing syndrome);05165(Human papillomavirus infection);05200(Pathways in cancer);05205(Proteoglycans in cancer);05217(Basal cell carcinoma);05224(Breast cancer);05225(Hepatocellular carcinoma);05226(Gastric cancer);05…	K00572	NA	Wnt family member 7B [Source:HGNC Symbol;Acc:HGNC:12787]	protein_coding	DOID:1240(leukemia);DOID:2531(hematologic_cancer);DOID:4(disease);DOID:162(cancer);DOID:14566(disease_of_cellular_proliferation);DOID:1036(chronic_leukemia);DOID:0060083(immune_system_cancer);DOID:0050686(organ_system_cancer)	R_HSA_3238698(WNT_ligand_biogenesis_and_trafficking);R_HSA_195721(Signaling_by_WNT);R_HSA_500792(GPCR_ligand_binding);R_HSA_373080(Class_B/2_(Secretin_family_receptors));R_HSA_162582(Signal_Transduction);R_HSA_372790(Signaling_by_GPCR)	14.1958	20.1552	11.8369	79.2981	74.6105	56.57	0.219442	-2.18809	3.1889e-28	1.68891e-25	down	yes
ENSG00000169174	PCSK9	14988;14989;14987;14992;14990;14991	ENST00000302118;ENST00000673903;ENST00000673726;ENST00000673913;ENST00000673662;ENST00000490692	GO:0001822(kidney development);GO:0001889(liver development);GO:0001920(negative regulation of receptor recycling);GO:0002092(positive regulation of receptor internalization);GO:0003723(RNA binding);GO:0004252(serine-type endopeptidase activity);GO:0005515(protein binding);GO:0005576(extracellular region);GO:0005615(extracellular space);GO:0005737(cytoplasm);GO:0005764(lysosome);GO:0005765(lysoso…	04979(Cholesterol metabolism);04979(Cholesterol metabolism)	K13050	EC:3.4.21.-	proprotein convertase subtilisin/kexin type 9 [Source:HGNC Symbol;Acc:HGNC:20001]	protein_coding;nonsense_mediated_decay;processed_transcript;retained_intron	NA	R_HSA_597592(Post_translational_protein_modification);R_HSA_382551(Transport_of_small_molecules);R_HSA_174824(Plasma_lipoprotein_assembly,_remodeling,_and_clearance);R_HSA_8964043(Plasma_lipoprotein_clearance);R_HSA_8866427(VLDLR_internalisation_and_degradation);R_HSA_8964038(LDL_clearance);R_HSA_392499(Metabolism_of_proteins);R_HSA_381426(Regulation_of_Insulin_like_Growth_Factor_(IGF)_transport_…	0.927843	0.831699	0.962324	4.81082	4.12368	3.00137	0.228041	-2.13264	3.79975e-28	1.98239e-25	down	yes
ENSG00000198113	TOR4A	229263	ENST00000357503	GO:0000166(nucleotide binding);GO:0002576(platelet degranulation);GO:0005524(ATP binding);GO:0005576(extracellular region);GO:0005635(nuclear envelope);GO:0005788(endoplasmic reticulum lumen);GO:0016020(membrane);GO:0016021(integral component of membrane);GO:0016887(ATPase activity);GO:0031093(platelet alpha granule lumen)	NA	NA	NA	torsin family 4 member A [Source:HGNC Symbol;Acc:HGNC:25981]	protein_coding	NA	R_HSA_76005(Response_to_elevated_platelet_cytosolic_Ca2+);R_HSA_76002(Platelet_activation,_signaling_and_aggregation);R_HSA_114608(Platelet_degranulation);R_HSA_109582(Hemostasis)	4.78381	4.83544	5.00013	19.0211	16.9246	12.7849	0.300004	-1.73694	4.08463e-28	2.09968e-25	down	yes
ENSG00000126368	NR1D1	100493	ENST00000246672	GO:0000122(negative regulation of transcription by RNA polymerase II);GO:0000790(nuclear chromatin);GO:0000976(transcription regulatory region sequence-specific DNA binding);GO:0000977(RNA polymerase II regulatory region sequence-specific DNA binding);GO:0000978(RNA polymerase II cis-regulatory region sequence-specific DNA binding);GO:0000981(DNA-binding transcription factor activity, RNA polymer…	04710(Circadian rhythm)	K03728	NA	nuclear receptor subfamily 1 group D member 1 [Source:HGNC Symbol;Acc:HGNC:7962]	protein_coding	NA	R_HSA_212436(Generic_Transcription_Pathway);R_HSA_2262752(Cellular_responses_to_stress);R_HSA_400253(Circadian_Clock);R_HSA_8953897(Cellular_responses_to_external_stimuli);R_HSA_1592230(Mitochondrial_biogenesis);R_HSA_74160(Gene_expression_(Transcription));R_HSA_1368071(NR1D1_(REV_ERBA)_represses_gene_expression);R_HSA_1852241(Organelle_biogenesis_and_maintenance);R_HSA_383280(Nuclear_Receptor_tr…	1.89163	3.02559	2.24789	15.081	12.8998	9.57326	0.190794	-2.38991	6.54756e-28	3.31696e-25	down	yes
ENSG00000100345	MYH9	154183;154184;154191;154189;154190;154195;154188;154192;154185;154187;154193	ENST00000216181;ENST00000475726;ENST00000472210;ENST00000473022;ENST00000477189;ENST00000456729;ENST00000495928;ENST00000463027;ENST00000486218;ENST00000459960;ENST00000401701	GO:0000146(microfilament motor activity);GO:0000166(nucleotide binding);GO:0000212(meiotic spindle organization);GO:0000904(cell morphogenesis involved in differentiation);GO:0001525(angiogenesis);GO:0001701(in utero embryonic development);GO:0001725(stress fiber);GO:0001726(ruffle);GO:0001768(establishment of T cell polarity);GO:0001772(immunological synapse);GO:0001778(plasma membrane repair);G…	04530(Tight junction);04810(Regulation of actin cytoskeleton);05132(Salmonella infection);05132(Salmonella infection)	K10352	NA	myosin heavy chain 9 [Source:HGNC Symbol;Acc:HGNC:7579]	protein_coding;processed_transcript;retained_intron	DOID:18(urinary_system_disease);DOID:1240(leukemia);DOID:2531(hematologic_cancer);DOID:225(syndrome);DOID:4(disease);DOID:5419(schizophrenia);DOID:2742(auditory_system_disease);DOID:2213(hemorrhagic_disease);DOID:557(kidney_disease);DOID:2921(glomerulonephritis);DOID:1247(blood_coagulation_disease);DOID:1588(thrombocytopenia);DOID:162(cancer);DOID:0050851(glomerulosclerosis);DOID:10003(sensorineu…	R_HSA_194315(Signaling_by_Rho_GTPases);R_HSA_9662851(Anti_inflammatory_response_favouring_Leishmania_parasite_infection);R_HSA_9664407(Parasite_infection);R_HSA_5627123(RHO_GTPases_activate_PAKs);R_HSA_5627117(RHO_GTPases_Activate_ROCKs);R_HSA_5653656(Vesicle_mediated_transport);R_HSA_5625740(RHO_GTPases_activate_PKNs);R_HSA_199991(Membrane_Trafficking);R_HSA_9658195(Leishmania_infection);R_HSA_9…	20.6033	22.5754	29.8331	103.11	93.9523	71.6321	0.271728	-1.87977	1.35232e-27	6.7529e-25	down	yes
ENSG00000163545	NUAK2	24964	ENST00000367157	GO:0000166(nucleotide binding);GO:0000287(magnesium ion binding);GO:0004672(protein kinase activity);GO:0004674(protein serine/threonine kinase activity);GO:0005515(protein binding);GO:0005524(ATP binding);GO:0005634(nucleus);GO:0005737(cytoplasm);GO:0006468(protein phosphorylation);GO:0006915(apoptotic process);GO:0016301(kinase activity);GO:0016310(phosphorylation);GO:0016740(transferase activi…	NA	K08800	EC:2.7.11.1	NUAK family kinase 2 [Source:HGNC Symbol;Acc:HGNC:29558]	protein_coding	NA	NA	6.42362	6.06083	7.04279	24.5238	22.9302	16.6401	0.304665	-1.7147	2.53948e-27	1.25025e-24	down	yes
ENSG00000104881	PPP1R13L	122079;122082;122081;122078;122083;122084;122080;122076	ENST00000360957;ENST00000585905;ENST00000589858;ENST00000587270;ENST00000593226;ENST00000592134;ENST00000418234;ENST00000589371	GO:0000122(negative regulation of transcription by RNA polymerase II);GO:0003215(cardiac right ventricle morphogenesis);GO:0003229(ventricular cardiac muscle tissue development);GO:0003714(transcription corepressor activity);GO:0005515(protein binding);GO:0005634(nucleus);GO:0005654(nucleoplasm);GO:0005737(cytoplasm);GO:0005829(cytosol);GO:0006351(transcription, DNA-templated);GO:0006357(regulati…	NA	NA	NA	protein phosphatase 1 regulatory subunit 13 like [Source:HGNC Symbol;Acc:HGNC:18838]	protein_coding;retained_intron	DOID:684(hepatocellular_carcinoma);DOID:3571(liver_cancer);DOID:4(disease);DOID:612(primary_immunodeficiency_disease);DOID:162(cancer);DOID:3119(gastrointestinal_system_cancer);DOID:657(adenoma);DOID:14566(disease_of_cellular_proliferation);DOID:686(liver_carcinoma);DOID:0060072(benign_neoplasm);DOID:2914(immune_system_disease);DOID:0060084(cell_type_benign_neoplasm);DOID:0050686(organ_system_can…	R_HSA_212436(Generic_Transcription_Pathway);R_HSA_74160(Gene_expression_(Transcription));R_HSA_3700989(Transcriptional_Regulation_by_TP53);R_HSA_5633007(Regulation_of_TP53_Activity);R_HSA_73857(RNA_Polymerase_II_Transcription);R_HSA_6804759(Regulation_of_TP53_Activity_through_Association_with_Co_factors)	0.666354	1.11448	0.888814	5.79861	4.95355	3.82659	0.183119	-2.44915	2.79326e-27	1.35609e-24	down	yes
ENSG00000132470	ITGB4	105977;105980;105978;105976;105989;105981;105990;105988;105984;105983;105979;105987	ENST00000200181;ENST00000449880;ENST00000450894;ENST00000579662;ENST00000584939;ENST00000584558;ENST00000578318;ENST00000579211;ENST00000584025;ENST00000584374;ENST00000580542;ENST00000583327	GO:0001664(G protein-coupled receptor binding);GO:0005178(integrin binding);GO:0005515(protein binding);GO:0005730(nucleolus);GO:0005886(plasma membrane);GO:0005925(focal adhesion);GO:0006914(autophagy);GO:0007154(cell communication);GO:0007155(cell adhesion);GO:0007160(cell-matrix adhesion);GO:0007229(integrin-mediated signaling pathway);GO:0008305(integrin complex);GO:0009611(response to woundi…	04151(PI3K-Akt signaling pathway);04510(Focal adhesion);04512(ECM-receptor interaction);04810(Regulation of actin cytoskeleton);05165(Human papillomavirus infection);05410(Hypertrophic cardiomyopathy (HCM));05412(Arrhythmogenic right ventricular cardiomyopathy (ARVC));05414(Dilated cardiomyopathy (DCM));05414(Dilated cardiomyopathy (DCM))	K06525	NA	integrin subunit beta 4 [Source:HGNC Symbol;Acc:HGNC:6158]	protein_coding;processed_transcript;retained_intron	DOID:1324(lung_cancer);DOID:8506(bullous_pemphigoid);DOID:225(syndrome);DOID:0050687(cell_type_cancer);DOID:4(disease);DOID:234(colon_adenocarcinoma);DOID:4195(hyperglycemia);DOID:1749(squamous_cell_carcinoma);DOID:2730(epidermolysis_bullosa);DOID:1781(thyroid_cancer);DOID:2723(dermatitis);DOID:9256(colorectal_cancer);DOID:4194(glucose_metabolism_disease);DOID:3856(male_reproductive_organ_cancer)…	R_HSA_1474290(Collagen_formation);R_HSA_1474244(Extracellular_matrix_organization);R_HSA_446728(Cell_junction_organization);R_HSA_3000157(Laminin_interactions);R_HSA_3000171(Non_integrin_membrane_ECM_interactions);R_HSA_2022090(Assembly_of_collagen_fibrils_and_other_multimeric_structures);R_HSA_1500931(Cell_Cell_communication);R_HSA_446107(Type_I_hemidesmosome_assembly);R_HSA_3000170(Syndecan_int…	6.67914	8.93895	7.81661	30.5413	30.4864	21.8025	0.282925	-1.82151	2.91255e-27	1.39463e-24	down	yes
ENSG00000110046	ATG2A	42803;42805;42802;42804;42809;42808	ENST00000377264;ENST00000472525;ENST00000418259;ENST00000421419;ENST00000461955;ENST00000461701	GO:0000045(autophagosome assembly);GO:0000407(phagophore assembly site);GO:0000422(autophagy of mitochondrion);GO:0005515(protein binding);GO:0005654(nucleoplasm);GO:0005811(lipid droplet);GO:0005829(cytosol);GO:0006914(autophagy);GO:0016020(membrane);GO:0019898(extrinsic component of membrane);GO:0034045(phagophore assembly site membrane);GO:0043231(intracellular membrane-bounded organelle);GO:0…	04136(Autophagy - other);04140(Autophagy - animal);04140(Autophagy - animal)	K17906	NA	autophagy related 2A [Source:HGNC Symbol;Acc:HGNC:29028]	protein_coding;retained_intron	NA	NA	1.60072	1.81078	1.53253	6.25718	6.04087	4.68941	0.29104	-1.78071	3.84772e-27	1.81753e-24	down	yes
ENSG00000006118	TMEM132A	41642;41633;41636;41638;41630;41643;41631;41637;41641;41634;41640;41632;41639	ENST00000540112;ENST00000005286;ENST00000537110;ENST00000544098;ENST00000453848;ENST00000535480;ENST00000537065;ENST00000534983;ENST00000538090;ENST00000543732;ENST00000536928;ENST00000544065;ENST00000536409	GO:0000139(Golgi membrane);GO:0003674(molecular_function);GO:0005783(endoplasmic reticulum);GO:0005788(endoplasmic reticulum lumen);GO:0005789(endoplasmic reticulum membrane);GO:0005794(Golgi apparatus);GO:0008150(biological_process);GO:0016020(membrane);GO:0016021(integral component of membrane);GO:0043687(post-translational protein modification);GO:0044267(cellular protein metabolic process);GO…	NA	K17599	NA	transmembrane protein 132A [Source:HGNC Symbol;Acc:HGNC:31092]	protein_coding;processed_transcript;retained_intron	NA	R_HSA_597592(Post_translational_protein_modification);R_HSA_392499(Metabolism_of_proteins);R_HSA_381426(Regulation_of_Insulin_like_Growth_Factor_(IGF)_transport_and_uptake_by_Insulin_like_Growth_Factor_Binding_Proteins_(IGFBPs));R_HSA_8957275(Post_translational_protein_phosphorylation)	3.54989	4.08247	5.57028	21.5361	17.5992	15.2653	0.242693	-2.0428	6.16991e-27	2.87559e-24	down	yes
ENSG00000074416	MGLL	164940;164945;164942;164938;164939;164944;164946;164949;164950;164948;164937;164951;164941	ENST00000434178;ENST00000648300;ENST00000476682;ENST00000453507;ENST00000398104;ENST00000398101;ENST00000484451;ENST00000493611;ENST00000476654;ENST00000479967;ENST00000265052;ENST00000494830;ENST00000496306	GO:0004622(lysophospholipase activity);GO:0005515(protein binding);GO:0005654(nucleoplasm);GO:0005737(cytoplasm);GO:0005789(endoplasmic reticulum membrane);GO:0005829(cytosol);GO:0005886(plasma membrane);GO:0006629(lipid metabolic process);GO:0006631(fatty acid metabolic process);GO:0006633(fatty acid biosynthetic process);GO:0006954(inflammatory response);GO:0009966(regulation of signal transduc…	00561(Glycerolipid metabolism);04714(Thermogenesis);04723(Retrograde endocannabinoid signaling);04923(Regulation of lipolysis in adipocytes);04923(Regulation of lipolysis in adipocytes)	K01054	EC:3.1.1.23	monoglyceride lipase [Source:HGNC Symbol;Acc:HGNC:17038]	protein_coding;processed_transcript	DOID:4(disease);DOID:162(cancer);DOID:14566(disease_of_cellular_proliferation)	R_HSA_426048(Arachidonate_production_from_DAG);R_HSA_76002(Platelet_activation,_signaling_and_aggregation);R_HSA_8979227(Triglyceride_metabolism);R_HSA_1482883(Acyl_chain_remodeling_of_DAG_and_TAG);R_HSA_1483206(Glycerophospholipid_biosynthesis);R_HSA_114508(Effects_of_PIP2_hydrolysis);R_HSA_162582(Signal_Transduction);R_HSA_416476(G_alpha_(q)_signalling_events);R_HSA_388396(GPCR_downstream_signa…	2.95048	3.11294	3.22861	9.9775	10.4905	7.47291	0.332561	-1.58831	6.50051e-27	2.9898e-24	down	yes
ENSG00000087303	NID2	69698;69702;69697;69704;69703;69701;69699;69700	ENST00000216286;ENST00000553297;ENST00000617139;ENST00000554284;ENST00000557051;ENST00000556572;ENST00000556686;ENST00000555310	GO:0005201(extracellular matrix structural constituent);GO:0005509(calcium ion binding);GO:0005515(protein binding);GO:0005518(collagen binding);GO:0005576(extracellular region);GO:0005604(basement membrane);GO:0005886(plasma membrane);GO:0007155(cell adhesion);GO:0007160(cell-matrix adhesion);GO:0030198(extracellular matrix organization);GO:0031012(extracellular matrix);GO:0062023(collagen-conta…	NA	K06826	NA	nidogen 2 [Source:HGNC Symbol;Acc:HGNC:13389]	protein_coding;retained_intron	DOID:4(disease);DOID:162(cancer);DOID:14566(disease_of_cellular_proliferation)	R_HSA_1474244(Extracellular_matrix_organization);R_HSA_3000157(Laminin_interactions)	0.625034	0.816627	0.385943	4.6282	3.89901	3.26825	0.154941	-2.69021	6.65836e-27	3.02264e-24	down	yes
ENSG00000112511	PHF1	194286;194289;194285;194288;194287;194281;194282;194284;194290;194291;194283	ENST00000374516;ENST00000486845;ENST00000374512;ENST00000488767;ENST00000495509;ENST00000427004;ENST00000487667;ENST00000459809;ENST00000427826;ENST00000479029;ENST00000428274	GO:0001226(RNA polymerase II transcription corepressor binding);GO:0003677(DNA binding);GO:0003682(chromatin binding);GO:0005515(protein binding);GO:0005634(nucleus);GO:0005654(nucleoplasm);GO:0005737(cytoplasm);GO:0005813(centrosome);GO:0005815(microtubule organizing center);GO:0005856(cytoskeleton);GO:0006325(chromatin organization);GO:0006355(regulation of transcription, DNA-templated);GO:0006…	NA	K11467	NA	PHD finger protein 1 [Source:HGNC Symbol;Acc:HGNC:8919]	protein_coding;retained_intron;nonsense_mediated_decay	NA	R_HSA_74160(Gene_expression_(Transcription));R_HSA_212165(Epigenetic_regulation_of_gene_expression);R_HSA_212300(PRC2_methylates_histones_and_DNA)	3.22988	3.20663	2.62357	11.2807	10.675	10.0691	0.282908	-1.82159	8.25404e-27	3.69897e-24	down	yes
ENSG00000197746	PSAP	31899;31900;31904;31902;31903	ENST00000394936;ENST00000394934;ENST00000633965;ENST00000495196;ENST00000493143	GO:0001664(G protein-coupled receptor binding);GO:0001865(NK T cell differentiation);GO:0002020(protease binding);GO:0002576(platelet degranulation);GO:0003335(corneocyte development);GO:0004565(beta-galactosidase activity);GO:0005515(protein binding);GO:0005543(phospholipid binding);GO:0005576(extracellular region);GO:0005615(extracellular space);GO:0005737(cytoplasm);GO:0005764(lysosome);GO:000…	04142(Lysosome);04142(Lysosome)	NA	NA	prosaposin [Source:HGNC Symbol;Acc:HGNC:9498]	protein_coding;retained_intron	DOID:4(disease);DOID:162(cancer);DOID:14566(disease_of_cellular_proliferation)	R_HSA_375276(Peptide_ligand_binding_receptors);R_HSA_76005(Response_to_elevated_platelet_cytosolic_Ca2+);R_HSA_373076(Class_A/1_(Rhodopsin_like_receptors));R_HSA_168249(Innate_Immune_System);R_HSA_76002(Platelet_activation,_signaling_and_aggregation);R_HSA_168256(Immune_System);R_HSA_500792(GPCR_ligand_binding);R_HSA_6798695(Neutrophil_degranulation);R_HSA_162582(Signal_Transduction);R_HSA_428157…	187.217	177.787	202.658	553.204	522.405	458.56	0.370013	-1.43435	1.057e-26	4.67691e-24	down	yes
ENSG00000089199	CHGB	143501;143502;143503	ENST00000378961;ENST00000455042;ENST00000488832	GO:0005179(hormone activity);GO:0005515(protein binding);GO:0005576(extracellular region);GO:0005615(extracellular space);GO:0005788(endoplasmic reticulum lumen);GO:0007165(signal transduction);GO:0030141(secretory granule);GO:0043687(post-translational protein modification);GO:0044267(cellular protein metabolic process);GO:0044267(cellular protein metabolic process)	NA	NA	NA	chromogranin B [Source:HGNC Symbol;Acc:HGNC:1930]	protein_coding;processed_transcript	DOID:230(lateral_sclerosis);DOID:1307(dementia);DOID:936(brain_disease);DOID:4(disease);DOID:5419(schizophrenia);DOID:0050828(artery_disease);DOID:649(prion_disease);DOID:11949(Creutzfeldt_Jakob_disease);DOID:1289(neurodegenerative_disease);DOID:332(amyotrophic_lateral_sclerosis);DOID:10652(Alzheimer's_disease);DOID:680(tauopathy);DOID:2468(psychotic_disorder);DOID:863(nervous_system_disease);DOI…	R_HSA_597592(Post_translational_protein_modification);R_HSA_392499(Metabolism_of_proteins);R_HSA_381426(Regulation_of_Insulin_like_Growth_Factor_(IGF)_transport_and_uptake_by_Insulin_like_Growth_Factor_Binding_Proteins_(IGFBPs));R_HSA_8957275(Post_translational_protein_phosphorylation)	3.69016	5.9876	4.94739	20.0565	22.3231	19.8971	0.234841	-2.09024	1.11074e-26	4.85322e-24	down	yes
ENSG00000130522	JUND	117414;117415	ENST00000252818;ENST00000600972	GO:0000122(negative regulation of transcription by RNA polymerase II);GO:0000785(chromatin);GO:0000790(nuclear chromatin);GO:0000976(transcription regulatory region sequence-specific DNA binding);GO:0000978(RNA polymerase II cis-regulatory region sequence-specific DNA binding);GO:0000981(DNA-binding transcription factor activity, RNA polymerase II-specific);GO:0001228(DNA-binding transcription ac…	04010(MAPK signaling pathway);04380(Osteoclast differentiation);04657(IL-17 signaling pathway);04928(Parathyroid hormone synthesis, secretion and action);04928(Parathyroid hormone synthesis, secretion and action)	K04449	NA	JunD proto-oncogene, AP-1 transcription factor subunit [Source:HGNC Symbol;Acc:HGNC:6206]	protein_coding	DOID:18(urinary_system_disease);DOID:1240(leukemia);DOID:2531(hematologic_cancer);DOID:17(musculoskeletal_system_disease);DOID:1037(lymphoblastic_leukemia);DOID:4(disease);DOID:557(kidney_disease);DOID:3856(male_reproductive_organ_cancer);DOID:2921(glomerulonephritis);DOID:423(myopathy);DOID:162(cancer);DOID:715(T_cell_leukemia);DOID:14566(disease_of_cellular_proliferation);DOID:10952(nephritis);…	R_HSA_166520(Signaling_by_NTRKs);R_HSA_9006931(Signaling_by_Nuclear_Receptors);R_HSA_9031628(NGF_stimulated_transcription);R_HSA_198725(Nuclear_Events_(kinase_and_transcription_factor_activation));R_HSA_162582(Signal_Transduction);R_HSA_9018519(Estrogen_dependent_gene_expression);R_HSA_187037(Signaling_by_NTRK1_(TRKA));R_HSA_8939211(ESR_mediated_signaling);R_HSA_9006934(Signaling_by_Receptor_Tyro…	10.8005	14.7362	14.9218	56.4991	49.1338	44.6113	0.269285	-1.8928	1.86106e-26	8.03126e-24	down	yes
ENSG00000205336	ADGRG1	90356;90332;90402;90364;90338;90355;90363;90352;90369;90381;90349;90394;90358;90386;90333;90401;90372;90380;90331;90325;90366;90400;90375;90388;90390;90362;90399;90389;90371;90391;90393;90328;90374;90368;90392;90340;90334;90396;90354;90359;90365;90361	ENST00000388813;ENST00000568908;ENST00000565505;ENST00000673126;ENST00000567835;ENST00000567154;ENST00000568234;ENST00000565338;ENST00000568979;ENST00000565539;ENST00000568487;ENST00000566169;ENST00000562558;ENST00000568700;ENST00000568909;ENST00000566187;ENST00000566123;ENST00000566508;ENST00000564907;ENST00000568791;ENST00000564338;ENST00000569158;ENST00000564783;ENST00000568531;ENST00000568074…	GO:0001525(angiogenesis);GO:0004888(transmembrane signaling receptor activity);GO:0004930(G protein-coupled receptor activity);GO:0005515(protein binding);GO:0005518(collagen binding);GO:0005576(extracellular region);GO:0005886(plasma membrane);GO:0005887(integral component of plasma membrane);GO:0007155(cell adhesion);GO:0007165(signal transduction);GO:0007166(cell surface receptor signaling pat…	NA	K08450	NA	adhesion G protein-coupled receptor G1 [Source:HGNC Symbol;Acc:HGNC:4512]	protein_coding;retained_intron;nonsense_mediated_decay;processed_transcript	DOID:225(syndrome);DOID:0050687(cell_type_cancer);DOID:4(disease);DOID:1749(squamous_cell_carcinoma);DOID:162(cancer);DOID:1909(melanoma);DOID:14566(disease_of_cellular_proliferation);DOID:305(carcinoma)	NA	3.33182	4.34328	3.71324	14.8343	14.0097	10.4892	0.289535	-1.78819	1.9353e-26	8.24979e-24	down	yes
ENSG00000130702	LAMA5	147774;147773;147779;147775;147785;147782;147786;147777;147781;147772;147780;147778;147784;147776	ENST00000252999;ENST00000370691;ENST00000471042;ENST00000495695;ENST00000370677;ENST00000497363;ENST00000497053;ENST00000491036;ENST00000464134;ENST00000492698;ENST00000481120;ENST00000468786;ENST00000474128;ENST00000462415	GO:0001658(branching involved in ureteric bud morphogenesis);GO:0001738(morphogenesis of a polarized epithelium);GO:0001755(neural crest cell migration);GO:0001822(kidney development);GO:0001942(hair follicle development);GO:0005102(signaling receptor binding);GO:0005178(integrin binding);GO:0005201(extracellular matrix structural constituent);GO:0005515(protein binding);GO:0005576(extracellular …	04151(PI3K-Akt signaling pathway);04510(Focal adhesion);04512(ECM-receptor interaction);05145(Toxoplasmosis);05146(Amoebiasis);05165(Human papillomavirus infection);05200(Pathways in cancer);05222(Small cell lung cancer);05222(Small cell lung cancer)	NA	NA	laminin subunit alpha 5 [Source:HGNC Symbol;Acc:HGNC:6485]	protein_coding;retained_intron;processed_transcript;nonsense_mediated_decay	DOID:2841(asthma);DOID:1176(bronchial_disease);DOID:684(hepatocellular_carcinoma);DOID:1240(leukemia);DOID:2531(hematologic_cancer);DOID:225(syndrome);DOID:0050687(cell_type_cancer);DOID:9415(allergic_asthma);DOID:850(lung_disease);DOID:3571(liver_cancer);DOID:1037(lymphoblastic_leukemia);DOID:4(disease);DOID:1579(respiratory_system_disease);DOID:2730(epidermolysis_bullosa);DOID:3856(male_reprodu…	R_HSA_1474244(Extracellular_matrix_organization);R_HSA_1280215(Cytokine_Signaling_in_Immune_system);R_HSA_168256(Immune_System);R_HSA_3000178(ECM_proteoglycans);R_HSA_3000157(Laminin_interactions);R_HSA_6806834(Signaling_by_MET);R_HSA_162582(Signal_Transduction);R_HSA_3000171(Non_integrin_membrane_ECM_interactions);R_HSA_6785807(Interleukin_4_and_Interleukin_13_signaling);R_HSA_1474228(Degradatio…	19.4384	17.813	17.7006	61.2244	59.4639	40.9238	0.340024	-1.55629	1.99958e-26	8.42114e-24	down	yes
ENSG00000092096	SLC22A17	67700;67698;67699;67705;67701;67703;67707;67702;67704	ENST00000397267;ENST00000354772;ENST00000397260;ENST00000557699;ENST00000474057;ENST00000473917;ENST00000556803;ENST00000206544;ENST00000474774	GO:0004888(transmembrane signaling receptor activity);GO:0005773(vacuole);GO:0005774(vacuolar membrane);GO:0005886(plasma membrane);GO:0005887(integral component of plasma membrane);GO:0006811(ion transport);GO:0006879(cellular iron ion homeostasis);GO:0015891(siderophore transport);GO:0016020(membrane);GO:0016021(integral component of membrane);GO:0022857(transmembrane transporter activity);GO:0…	NA	K08213	NA	solute carrier family 22 member 17 [Source:HGNC Symbol;Acc:HGNC:23095]	protein_coding;nonsense_mediated_decay;retained_intron	NA	R_HSA_382551(Transport_of_small_molecules);R_HSA_917937(Iron_uptake_and_transport)	1.41024	1.56729	1.29531	5.82731	6.02381	4.52932	0.260851	-1.9387	2.06706e-26	8.60167e-24	down	yes
ENSG00000143126	CELSR2	17901;17903;17902;17904	ENST00000271332;ENST00000489018;ENST00000459940;ENST00000498157	GO:0001764(neuron migration);GO:0003341(cilium movement);GO:0004888(transmembrane signaling receptor activity);GO:0004930(G protein-coupled receptor activity);GO:0005509(calcium ion binding);GO:0005737(cytoplasm);GO:0005886(plasma membrane);GO:0006355(regulation of transcription, DNA-templated);GO:0007155(cell adhesion);GO:0007156(homophilic cell adhesion via plasma membrane adhesion molecules);G…	NA	K04601	NA	cadherin EGF LAG seven-pass G-type receptor 2 [Source:HGNC Symbol;Acc:HGNC:3231]	protein_coding;processed_transcript	NA	NA	0.770181	0.750507	1.12136	4.19135	3.98894	2.89575	0.238537	-2.06772	2.46967e-26	1.01562e-23	down	yes
ENSG00000277258	PCGF2	100133;100136;100132;100135;100134;100137	ENST00000616199;ENST00000616129;ENST00000620225;ENST00000611883;ENST00000610747;ENST00000618941	GO:0000122(negative regulation of transcription by RNA polymerase II);GO:0000790(nuclear chromatin);GO:0001701(in utero embryonic development);GO:0001739(sex chromatin);GO:0003677(DNA binding);GO:0003682(chromatin binding);GO:0005515(protein binding);GO:0005634(nucleus);GO:0005654(nucleoplasm);GO:0006342(chromatin silencing);GO:0009952(anterior/posterior pattern specification);GO:0016573(histone …	04550(Signaling pathways regulating pluripotency of stem cells);04550(Signaling pathways regulating pluripotency of stem cells)	K11460	NA	polycomb group ring finger 2 [Source:HGNC Symbol;Acc:HGNC:12929]	protein_coding	DOID:630(genetic_disease);DOID:225(syndrome);DOID:0050687(cell_type_cancer);DOID:4(disease);DOID:0050177(monogenic_disease);DOID:0050739(autosomal_genetic_disease);DOID:2994(germ_cell_cancer);DOID:0050737(autosomal_recessive_disease);DOID:162(cancer);DOID:3095(germ_cell_and_embryonal_cancer);DOID:14566(disease_of_cellular_proliferation);DOID:3911(progeria);DOID:171(neuroectodermal_tumor)	R_HSA_4551638(SUMOylation_of_chromatin_organization_proteins);R_HSA_212436(Generic_Transcription_Pathway);R_HSA_4655427(SUMOylation_of_DNA_methylation_proteins);R_HSA_597592(Post_translational_protein_modification);R_HSA_5617472(Activation_of_anterior_HOX_genes_in_hindbrain_development_during_early_embryogenesis);R_HSA_74160(Gene_expression_(Transcription));R_HSA_5619507(Activation_of_HOX_genes_d…	2.85793	3.44741	4.40565	15.3986	14.8169	12.3783	0.251469	-1.99155	2.8916e-26	1.1753e-23	down	yes
ENSG00000169992	NLGN2	96064;96062;96065;96063	ENST00000302926;ENST00000575301;ENST00000570940;ENST00000572893	GO:0002087(regulation of respiratory gaseous exchange by nervous system process);GO:0005886(plasma membrane);GO:0005887(integral component of plasma membrane);GO:0007155(cell adhesion);GO:0007158(neuron cell-cell adhesion);GO:0007268(chemical synaptic transmission);GO:0007416(synapse assembly);GO:0009986(cell surface);GO:0016020(membrane);GO:0016021(integral component of membrane);GO:0019233(sens…	04514(Cell adhesion molecules (CAMs));04514(Cell adhesion molecules (CAMs))	K07378	NA	neuroligin 2 [Source:HGNC Symbol;Acc:HGNC:14290]	protein_coding;processed_transcript	NA	R_HSA_6794361(Neurexins_and_neuroligins);R_HSA_6794362(Protein_protein_interactions_at_synapses);R_HSA_112316(Neuronal_System)	2.66496	3.28055	3.5069	11.6332	11.631	9.01244	0.292856	-1.77173	1.01894e-25	4.09391e-23	down	yes
ENSG00000175115	PACS1	43442;43443;43454;43448;43449;43456;43444;43447;43451;43455;43445;43457;43450;43452;43446;43453	ENST00000320580;ENST00000527224;ENST00000525798;ENST00000533811;ENST00000534273;ENST00000531597;ENST00000533756;ENST00000524784;ENST00000528935;ENST00000524815;ENST00000527380;ENST00000529677;ENST00000529757;ENST00000529795;ENST00000531298;ENST00000676419	GO:0005515(protein binding);GO:0005794(Golgi apparatus);GO:0005829(cytosol);GO:0016032(viral process);GO:0030137(COPI-coated vesicle);GO:0034067(protein localization to Golgi apparatus);GO:0044325(ion channel binding);GO:0050690(regulation of defense response to virus by virus);GO:0072659(protein localization to plasma membrane);GO:0072659(protein localization to plasma membrane)	NA	K23290	NA	phosphofurin acidic cluster sorting protein 1 [Source:HGNC Symbol;Acc:HGNC:30032]	protein_coding;retained_intron;nonsense_mediated_decay	NA	R_HSA_164952(The_role_of_Nef_in_HIV_1_replication_and_disease_pathogenesis);R_HSA_164940(Nef_mediated_downregulation_of_MHC_class_I_complex_cell_surface_expression);R_HSA_164938(Nef_mediates_down_modulation_of_cell_surface_receptors_by_recruiting_them_to_clathrin_adapters);R_HSA_5663205(Infectious_disease);R_HSA_1643685(Disease);R_HSA_162906(HIV_Infection);R_HSA_162909(Host_Interactions_of_HIV_fa…	2.78195	3.02733	3.86425	12.4076	12.4265	8.91178	0.286659	-1.80259	1.17177e-25	4.65447e-23	down	yes
ENSG00000091136	LAMB1	208850;208840;208841;208852;208851;208844;208846;208839;208848;208843;208845;208842;208849	ENST00000393560;ENST00000222399;ENST00000393561;ENST00000393559;ENST00000439976;ENST00000491196;ENST00000468999;ENST00000472714;ENST00000476039;ENST00000468518;ENST00000470995;ENST00000474380;ENST00000479448	GO:0005178(integrin binding);GO:0005198(structural molecule activity);GO:0005201(extracellular matrix structural constituent);GO:0005515(protein binding);GO:0005576(extracellular region);GO:0005604(basement membrane);GO:0005606(laminin-1 complex);GO:0005607(laminin-2 complex);GO:0005615(extracellular space);GO:0005788(endoplasmic reticulum lumen);GO:0007155(cell adhesion);GO:0009887(animal organ …	04151(PI3K-Akt signaling pathway);04510(Focal adhesion);04512(ECM-receptor interaction);05145(Toxoplasmosis);05146(Amoebiasis);05165(Human papillomavirus infection);05200(Pathways in cancer);05222(Small cell lung cancer);05222(Small cell lung cancer)	NA	NA	laminin subunit beta 1 [Source:HGNC Symbol;Acc:HGNC:6486]	protein_coding;processed_transcript;retained_intron	DOID:3620(central_nervous_system_cancer);DOID:0050687(cell_type_cancer);DOID:936(brain_disease);DOID:4(disease);DOID:3856(male_reproductive_organ_cancer);DOID:0060085(organ_system_benign_neoplasm);DOID:162(cancer);DOID:0050622(reproductive_organ_benign_neoplasm);DOID:863(nervous_system_disease);DOID:289(endometriosis);DOID:0060095(uterine_benign_neoplasm);DOID:14566(disease_of_cellular_proliferat…	R_HSA_597592(Post_translational_protein_modification);R_HSA_1474244(Extracellular_matrix_organization);R_HSA_9619665(EGR2_and_SOX10_mediated_initiation_of_Schwann_cell_myelination);R_HSA_3000178(ECM_proteoglycans);R_HSA_3000157(Laminin_interactions);R_HSA_6806834(Signaling_by_MET);R_HSA_1266738(Developmental_Biology);R_HSA_162582(Signal_Transduction);R_HSA_3000171(Non_integrin_membrane_ECM_intera…	22.9908	28.382	23.0536	81.8628	81.7623	63.7703	0.327299	-1.61132	1.21217e-25	4.76082e-23	down	yes
ENSG00000141526	SLC16A3	107691;107692;107682;107687;107698;107681;107683;107685;107690;107700;107688;107679;107678	ENST00000392339;ENST00000581287;ENST00000582743;ENST00000578574;ENST00000578810;ENST00000581642;ENST00000583444;ENST00000578684;ENST00000580098;ENST00000583025;ENST00000579572;ENST00000392341;ENST00000584689	GO:0003723(RNA binding);GO:0005515(protein binding);GO:0005886(plasma membrane);GO:0005887(integral component of plasma membrane);GO:0006090(pyruvate metabolic process);GO:0008028(monocarboxylic acid transmembrane transporter activity);GO:0015129(lactate transmembrane transporter activity);GO:0015293(symporter activity);GO:0015718(monocarboxylic acid transport);GO:0016020(membrane);GO:0016021(int…	05230(Central carbon metabolism in cancer);05230(Central carbon metabolism in cancer)	K08180	NA	solute carrier family 16 member 3 [Source:HGNC Symbol;Acc:HGNC:10924]	protein_coding;retained_intron	NA	R_HSA_210991(Basigin_interactions);R_HSA_70268(Pyruvate_metabolism);R_HSA_382551(Transport_of_small_molecules);R_HSA_425407(SLC_mediated_transmembrane_transport);R_HSA_1428517(The_citric_acid_(TCA)_cycle_and_respiratory_electron_transport);R_HSA_202733(Cell_surface_interactions_at_the_vascular_wall);R_HSA_71406(Pyruvate_metabolism_and_Citric_Acid_(TCA)_cycle);R_HSA_433692(Proton_coupled_monocarbo…	4.71138	3.93842	4.28192	13.5771	12.2311	11.204	0.349391	-1.51708	1.28545e-25	4.99254e-23	down	yes
ENSG00000117984	CTSD	36646;36641;36653;36649;36651;36648;36650;36647;36652;36644;36643;36654	ENST00000636571;ENST00000236671;ENST00000367196;ENST00000636843;ENST00000497544;ENST00000637387;ENST00000429746;ENST00000637158;ENST00000438213;ENST00000637937;ENST00000433655;ENST00000637381	GO:0004190(aspartic-type endopeptidase activity);GO:0005515(protein binding);GO:0005576(extracellular region);GO:0005615(extracellular space);GO:0005764(lysosome);GO:0005765(lysosomal membrane);GO:0006508(proteolysis);GO:0008233(peptidase activity);GO:0010008(endosome membrane);GO:0016787(hydrolase activity);GO:0019886(antigen processing and presentation of exogenous peptide antigen via MHC class…	04071(Sphingolipid signaling pathway);04140(Autophagy - animal);04142(Lysosome);04210(Apoptosis);04915(Estrogen signaling pathway);05152(Tuberculosis);05152(Tuberculosis)	NA	NA	cathepsin D [Source:HGNC Symbol;Acc:HGNC:2529]	protein_coding;retained_intron;processed_transcript;nonsense_mediated_decay	DOID:0060037(developmental_disorder_of_mental_health);DOID:1307(dementia);DOID:0050687(cell_type_cancer);DOID:0060040(pervasive_developmental_disorder);DOID:936(brain_disease);DOID:4(disease);DOID:0050828(artery_disease);DOID:1749(squamous_cell_carcinoma);DOID:649(prion_disease);DOID:1192(peripheral_nervous_system_neoplasm);DOID:11949(Creutzfeldt_Jakob_disease);DOID:1289(neurodegenerative_disease…	R_HSA_9006931(Signaling_by_Nuclear_Receptors);R_HSA_1442490(Collagen_degradation);R_HSA_1474244(Extracellular_matrix_organization);R_HSA_2022377(Metabolism_of_Angiotensinogen_to_Angiotensins);R_HSA_2132295(MHC_class_II_antigen_presentation);R_HSA_168249(Innate_Immune_System);R_HSA_168256(Immune_System);R_HSA_2980736(Peptide_hormone_metabolism);R_HSA_6798695(Neutrophil_degranulation);R_HSA_162582(…	33.1047	30.6562	44.4815	138.888	129.946	100.298	0.293235	-1.76987	1.41046e-25	5.41788e-23	down	yes
ENSG00000197111	PCBP2	55032;55027;55023;55037;55038;55017;55020;55033;55016;55034;55035;55030;55028;55043;55024;55039;55031;55036;55029;55019;55018;55026;55042;55025	ENST00000546652;ENST00000552819;ENST00000552296;ENST00000553064;ENST00000547859;ENST00000437231;ENST00000549863;ENST00000562264;ENST00000359282;ENST00000548190;ENST00000550585;ENST00000439930;ENST00000550910;ENST00000550733;ENST00000550192;ENST00000549272;ENST00000548933;ENST00000547987;ENST00000455667;ENST00000546463;ENST00000447282;ENST00000552980;ENST00000547048;ENST00000551104	GO:0000398(mRNA splicing, via spliceosome);GO:0002376(immune system process);GO:0003676(nucleic acid binding);GO:0003677(DNA binding);GO:0003697(single-stranded DNA binding);GO:0003723(RNA binding);GO:0003729(mRNA binding);GO:0005515(protein binding);GO:0005634(nucleus);GO:0005654(nucleoplasm);GO:0005737(cytoplasm);GO:0005829(cytosol);GO:0005925(focal adhesion);GO:0010468(regulation of gene expre…	04216(Ferroptosis);04216(Ferroptosis)	NA	NA	poly(rC) binding protein 2 [Source:HGNC Symbol;Acc:HGNC:8648]	nonsense_mediated_decay;protein_coding;retained_intron	DOID:1240(leukemia);DOID:2531(hematologic_cancer);DOID:4(disease);DOID:3856(male_reproductive_organ_cancer);DOID:162(cancer);DOID:14566(disease_of_cellular_proliferation);DOID:0060083(immune_system_cancer);DOID:0050686(organ_system_cancer);DOID:10283(prostate_cancer);DOID:193(reproductive_organ_cancer)	R_HSA_168249(Innate_Immune_System);R_HSA_168256(Immune_System);R_HSA_936440(Negative_regulators_of_DDX58/IFIH1_signaling);R_HSA_72163(mRNA_Splicing_Major_Pathway);R_HSA_8953854(Metabolism_of_RNA);R_HSA_72203(Processing_of_Capped_Intron_Containing_Pre_mRNA);R_HSA_168928(DDX58/IFIH1_mediated_induction_of_interferon_alpha/beta);R_HSA_72172(mRNA_Splicing)	27.6915	27.1902	30.1456	81.8846	77.2432	65.4282	0.378646	-1.40108	2.62811e-25	9.98539e-23	down	yes
ENSG00000196924	FLNA	6782;6785;6783;6789;6793;6791;6786;6800;6796;6794;6792;6795;6797;6787;6799;6798;6790	ENST00000420627;ENST00000369856;ENST00000360319;ENST00000490936;ENST00000474358;ENST00000462590;ENST00000369850;ENST00000673639;ENST00000438732;ENST00000466325;ENST00000444578;ENST00000415241;ENST00000474072;ENST00000422373;ENST00000465144;ENST00000466319;ENST00000498491	GO:0001664(G protein-coupled receptor binding);GO:0002576(platelet degranulation);GO:0003723(RNA binding);GO:0003779(actin binding);GO:0005515(protein binding);GO:0005576(extracellular region);GO:0005634(nucleus);GO:0005730(nucleolus);GO:0005737(cytoplasm);GO:0005829(cytosol);GO:0005856(cytoskeleton);GO:0005884(actin filament);GO:0005886(plasma membrane);GO:0005911(cell-cell junction);GO:0005925(…	04010(MAPK signaling pathway);04510(Focal adhesion);05132(Salmonella infection);05205(Proteoglycans in cancer);05205(Proteoglycans in cancer)	NA	NA	filamin A [Source:HGNC Symbol;Acc:HGNC:3754]	nonsense_mediated_decay;protein_coding;retained_intron;processed_transcript	DOID:0060037(developmental_disorder_of_mental_health);DOID:61(mitral_valve_disease);DOID:8437(intestinal_obstruction);DOID:17(musculoskeletal_system_disease);DOID:630(genetic_disease);DOID:225(syndrome);DOID:0050687(cell_type_cancer);DOID:4(disease);DOID:0050177(monogenic_disease);DOID:1059(intellectual_disability);DOID:5295(intestinal_disease);DOID:2213(hemorrhagic_disease);DOID:77(gastrointesti…	R_HSA_194315(Signaling_by_Rho_GTPases);R_HSA_5627123(RHO_GTPases_activate_PAKs);R_HSA_446353(Cell_extracellular_matrix_interactions);R_HSA_76005(Response_to_elevated_platelet_cytosolic_Ca2+);R_HSA_446728(Cell_junction_organization);R_HSA_1280215(Cytokine_Signaling_in_Immune_system);R_HSA_1169410(Antiviral_mechanism_by_IFN_stimulated_genes);R_HSA_76002(Platelet_activation,_signaling_and_aggregatio…	37.6375	36.9865	56.3859	180.604	171.427	129.12	0.272284	-1.87681	3.83393e-25	1.44102e-22	down	yes
ENSG00000120708	TGFBI	186758;186748;186760;186747;186753;186756;186752;186755;186746;186759;186750;186757;186749	ENST00000508076;ENST00000506699;ENST00000504411;ENST00000442011;ENST00000604555;ENST00000514242;ENST00000509749;ENST00000509485;ENST00000504185;ENST00000503087;ENST00000515433;ENST00000513497;ENST00000507018	GO:0001525(angiogenesis);GO:0002062(chondrocyte differentiation);GO:0005178(integrin binding);GO:0005201(extracellular matrix structural constituent);GO:0005515(protein binding);GO:0005518(collagen binding);GO:0005576(extracellular region);GO:0005604(basement membrane);GO:0005615(extracellular space);GO:0005802(trans-Golgi network);GO:0005886(plasma membrane);GO:0007155(cell adhesion);GO:0007162(…	NA	K19519	NA	transforming growth factor beta induced [Source:HGNC Symbol;Acc:HGNC:11771]	protein_coding;retained_intron;nonsense_mediated_decay;processed_transcript	DOID:0080001(bone_disease);DOID:684(hepatocellular_carcinoma);DOID:17(musculoskeletal_system_disease);DOID:3571(liver_cancer);DOID:4(disease);DOID:1192(peripheral_nervous_system_neoplasm);DOID:848(arthritis);DOID:2621(autonomic_nervous_system_neoplasm);DOID:162(cancer);DOID:3119(gastrointestinal_system_cancer);DOID:863(nervous_system_disease);DOID:1492(eye_and_adnexa_disease);DOID:769(neuroblasto…	R_HSA_977225(Amyloid_fiber_formation);R_HSA_392499(Metabolism_of_proteins)	55.2775	68.8487	62.6856	199.812	196.859	154.081	0.339194	-1.55982	4.56494e-25	1.69753e-22	down	yes
ENSG00000138759	FRAS1	174446;174447;174453;174454;174450;174448;174451	ENST00000512123;ENST00000325942;ENST00000510944;ENST00000509802;ENST00000502446;ENST00000508909;ENST00000508900	GO:0002009(morphogenesis of an epithelium);GO:0003338(metanephros morphogenesis);GO:0005201(extracellular matrix structural constituent);GO:0005515(protein binding);GO:0005604(basement membrane);GO:0005886(plasma membrane);GO:0007154(cell communication);GO:0015031(protein transport);GO:0016020(membrane);GO:0016021(integral component of membrane);GO:0030326(embryonic limb morphogenesis);GO:0043588…	NA	NA	NA	Fraser extracellular matrix complex subunit 1 [Source:HGNC Symbol;Acc:HGNC:19185]	protein_coding;retained_intron;nonsense_mediated_decay	DOID:225(syndrome);DOID:4(disease)	NA	0.772378	0.744783	1.05671	3.30039	3.44007	2.51197	0.278183	-1.84589	4.88064e-25	1.79582e-22	down	yes
ENSG00000261796	ISY1-RAB43	165072	ENST00000418265	GO:0000350(generation of catalytic spliceosome for second transesterification step)	03040(Spliceosome)	K12870	NA	ISY1-RAB43 readthrough [Source:HGNC Symbol;Acc:HGNC:42969]	protein_coding	NA	NA	0	0	0	4.03212	2.99474	2.9761	2.99911e-05	-15.0251	5.43272e-25	1.97813e-22	down	yes
ENSG00000086548	CEACAM6	121237;121236	ENST00000199764;ENST00000595740	GO:0005515(protein binding);GO:0005615(extracellular space);GO:0005886(plasma membrane);GO:0006915(apoptotic process);GO:0007155(cell adhesion);GO:0007156(homophilic cell adhesion via plasma membrane adhesion molecules);GO:0007157(heterophilic cell-cell adhesion via plasma membrane cell adhesion molecules);GO:0007165(signal transduction);GO:0008284(positive regulation of cell population prolifera…	NA	K06499	NA	CEA cell adhesion molecule 6 [Source:HGNC Symbol;Acc:HGNC:1818]	protein_coding	DOID:2394(ovarian_cancer);DOID:1240(leukemia);DOID:2531(hematologic_cancer);DOID:630(genetic_disease);DOID:1037(lymphoblastic_leukemia);DOID:4(disease);DOID:0050177(monogenic_disease);DOID:5295(intestinal_disease);DOID:77(gastrointestinal_system_disease);DOID:1485(cystic_fibrosis);DOID:0050739(autosomal_genetic_disease);DOID:0050737(autosomal_recessive_disease);DOID:170(endocrine_gland_cancer);DO…	R_HSA_1474244(Extracellular_matrix_organization);R_HSA_168249(Innate_Immune_System);R_HSA_1566977(Fibronectin_matrix_formation);R_HSA_202733(Cell_surface_interactions_at_the_vascular_wall);R_HSA_168256(Immune_System);R_HSA_6798695(Neutrophil_degranulation);R_HSA_109582(Hemostasis)	1.99627	2.82542	3.31934	11.6089	12.8876	11.7402	0.224662	-2.15417	6.04558e-25	2.17859e-22	down	yes
ENSG00000158195	WASF2	11515	ENST00000618852	GO:0001525(angiogenesis);GO:0001667(ameboidal-type cell migration);GO:0001726(ruffle);GO:0003779(actin binding);GO:0005515(protein binding);GO:0005737(cytoplasm);GO:0005769(early endosome);GO:0005829(cytosol);GO:0005856(cytoskeleton);GO:0005886(plasma membrane);GO:0005911(cell-cell junction);GO:0006897(endocytosis);GO:0007188(adenylate cyclase-modulating G protein-coupled receptor signaling pathw…	04520(Adherens junction);04666(Fc gamma R-mediated phagocytosis);04810(Regulation of actin cytoskeleton);05100(Bacterial invasion of epithelial cells);05131(Shigellosis);05132(Salmonella infection);05231(Choline metabolism in cancer)	K05748	NA	WASP family member 2 [Source:HGNC Symbol;Acc:HGNC:12733]	protein_coding	DOID:684(hepatocellular_carcinoma);DOID:1324(lung_cancer);DOID:0050687(cell_type_cancer);DOID:3571(liver_cancer);DOID:4(disease);DOID:1749(squamous_cell_carcinoma);DOID:3905(lung_carcinoma);DOID:162(cancer);DOID:3119(gastrointestinal_system_cancer);DOID:3908(non_small_cell_lung_carcinoma);DOID:14566(disease_of_cellular_proliferation);DOID:686(liver_carcinoma);DOID:3907(lung_squamous_cell_carcinom…	R_HSA_194315(Signaling_by_Rho_GTPases);R_HSA_9012999(RHO_GTPase_cycle);R_HSA_9664407(Parasite_infection);R_HSA_194138(Signaling_by_VEGF);R_HSA_9658195(Leishmania_infection);R_HSA_168249(Innate_Immune_System);R_HSA_9013149(RAC1_GTPase_cycle);R_HSA_5663213(RHO_GTPases_Activate_WASPs_and_WAVEs);R_HSA_9716542(Signaling_by_Rho_GTPases,_Miro_GTPases_and_RHOBTB3);R_HSA_195258(RHO_GTPase_Effectors);R_HSA…	7.21388	8.97091	8.00078	26.5843	25.6559	21.0415	0.330035	-1.59931	6.80176e-25	2.42608e-22	down	yes
ENSG00000198792	TMEM184B	154590;154591;154599;154593;154597;154595;154600;154604;154598;154592	ENST00000361906;ENST00000633056;ENST00000474416;ENST00000361684;ENST00000403210;ENST00000633438;ENST00000457534;ENST00000466117;ENST00000488844;ENST00000436674	GO:0016020(membrane);GO:0016021(integral component of membrane);GO:0016021(integral component of membrane)	NA	NA	NA	transmembrane protein 184B [Source:HGNC Symbol;Acc:HGNC:1310]	protein_coding;retained_intron;processed_transcript;nonsense_mediated_decay	NA	NA	2.71148	2.66467	3.49382	11.2872	10.9861	7.86682	0.294292	-1.76468	7.0224e-25	2.47947e-22	down	yes
ENSG00000275993	SIK1B	148310;148311	ENST00000613488;ENST00000624077	GO:0000166(nucleotide binding);GO:0000287(magnesium ion binding);GO:0004672(protein kinase activity);GO:0004674(protein serine/threonine kinase activity);GO:0005515(protein binding);GO:0005524(ATP binding);GO:0005634(nucleus);GO:0005737(cytoplasm);GO:0006468(protein phosphorylation);GO:0016301(kinase activity);GO:0016310(phosphorylation);GO:0016740(transferase activity);GO:0035556(intracellular s…	04922(Glucagon signaling pathway);04922(Glucagon signaling pathway)	K19008	EC:2.7.11.1	salt inducible kinase 1B (putative) [Source:HGNC Symbol;Acc:HGNC:52389]	protein_coding;retained_intron	NA	NA	24.0741	25.0185	25.6554	72.5399	69.77	55.6902	0.377515	-1.40539	7.99028e-25	2.793e-22	down	yes
ENSG00000141458	NPC1	109438;109444;109442;109429;109439;109445;109440;109447;109432;109443;109446;109441;109430	ENST00000269228;ENST00000540608;ENST00000591955;ENST00000591107;ENST00000588867;ENST00000586718;ENST00000591051;ENST00000587223;ENST00000593280;ENST00000591075;ENST00000590301;ENST00000587163;ENST00000590723	GO:0001618(virus receptor activity);GO:0004888(transmembrane signaling receptor activity);GO:0005319(lipid transporter activity);GO:0005515(protein binding);GO:0005576(extracellular region);GO:0005635(nuclear envelope);GO:0005764(lysosome);GO:0005765(lysosomal membrane);GO:0005768(endosome);GO:0005783(endoplasmic reticulum);GO:0005794(Golgi apparatus);GO:0005886(plasma membrane);GO:0005887(integr…	04142(Lysosome);04979(Cholesterol metabolism);04979(Cholesterol metabolism)	K12385	NA	NPC intracellular cholesterol transporter 1 [Source:HGNC Symbol;Acc:HGNC:7897]	protein_coding;processed_transcript;retained_intron	DOID:1307(dementia);DOID:3405(histiocytosis);DOID:654(overnutrition);DOID:4(disease);DOID:75(lymphatic_system_disease);DOID:0050828(artery_disease);DOID:1289(neurodegenerative_disease);DOID:9455(lipid_storage_disease);DOID:0014667(disease_of_metabolism);DOID:114(heart_disease);DOID:1927(sphingolipidosis);DOID:3393(coronary_artery_disease);DOID:10652(Alzheimer's_disease);DOID:680(tauopathy);DOID:1…	R_HSA_382551(Transport_of_small_molecules);R_HSA_174824(Plasma_lipoprotein_assembly,_remodeling,_and_clearance);R_HSA_8964043(Plasma_lipoprotein_clearance);R_HSA_8964038(LDL_clearance)	3.69479	4.79627	3.07926	16.6161	14.7286	12.3504	0.264798	-1.91704	9.26319e-25	3.20589e-22	down	yes
ENSG00000135862	LAMC1	23729;23731;23734;23730;23733;23732	ENST00000258341;ENST00000479499;ENST00000495918;ENST00000484114;ENST00000478064;ENST00000466964	GO:0005201(extracellular matrix structural constituent);GO:0005576(extracellular region);GO:0005604(basement membrane);GO:0005606(laminin-1 complex);GO:0005615(extracellular space);GO:0005788(endoplasmic reticulum lumen);GO:0007155(cell adhesion);GO:0007492(endoderm development);GO:0009887(animal organ morphogenesis);GO:0009888(tissue development);GO:0016477(cell migration);GO:0022617(extracellul…	04151(PI3K-Akt signaling pathway);04510(Focal adhesion);04512(ECM-receptor interaction);05020(Prion diseases);05145(Toxoplasmosis);05146(Amoebiasis);05165(Human papillomavirus infection);05200(Pathways in cancer);05222(Small cell lung cancer);05222(Small cell lung cancer)	K05635	NA	laminin subunit gamma 1 [Source:HGNC Symbol;Acc:HGNC:6492]	protein_coding;processed_transcript	DOID:230(lateral_sclerosis);DOID:1307(dementia);DOID:0050687(cell_type_cancer);DOID:4(disease);DOID:3069(astrocytoma);DOID:3068(glioblastoma_multiforme);DOID:1289(neurodegenerative_disease);DOID:3856(male_reproductive_organ_cancer);DOID:162(cancer);DOID:332(amyotrophic_lateral_sclerosis);DOID:10652(Alzheimer's_disease);DOID:680(tauopathy);DOID:863(nervous_system_disease);DOID:289(endometriosis);D…	R_HSA_597592(Post_translational_protein_modification);R_HSA_1474244(Extracellular_matrix_organization);R_HSA_9619665(EGR2_and_SOX10_mediated_initiation_of_Schwann_cell_myelination);R_HSA_3000178(ECM_proteoglycans);R_HSA_3000157(Laminin_interactions);R_HSA_6806834(Signaling_by_MET);R_HSA_1266738(Developmental_Biology);R_HSA_162582(Signal_Transduction);R_HSA_3000171(Non_integrin_membrane_ECM_intera…	17.1108	20.0274	22.1345	64.281	63.8102	49.2323	0.334263	-1.58094	9.85637e-25	3.37774e-22	down	yes
ENSG00000090339	ICAM1	115071;115072;115069;115073	ENST00000264832;ENST00000585443;ENST00000423829;ENST00000592686	GO:0001541(ovarian follicle development);GO:0001618(virus receptor activity);GO:0001666(response to hypoxia);GO:0001772(immunological synapse);GO:0001910(regulation of leukocyte mediated cytotoxicity);GO:0001975(response to amphetamine);GO:0002291(T cell activation via T cell receptor contact with antigen bound to MHC molecule on antigen presenting cell);GO:0002438(acute inflammatory response to …	04064(NF-kappa B signaling pathway);04514(Cell adhesion molecules (CAMs));04650(Natural killer cell mediated cytotoxicity);04668(TNF signaling pathway);04670(Leukocyte transendothelial migration);04933(AGE-RAGE signaling pathway in diabetic complications);05143(African trypanosomiasis);05144(Malaria);05150(Staphylococcus aureus infection);05164(Influenza A);05166(Human T-cell leukemia virus 1 inf…	NA	NA	intercellular adhesion molecule 1 [Source:HGNC Symbol;Acc:HGNC:5344]	protein_coding;processed_transcript;retained_intron	DOID:2841(asthma);DOID:18(urinary_system_disease);DOID:1176(bronchial_disease);DOID:0080001(bone_disease);DOID:684(hepatocellular_carcinoma);DOID:12205(dengue_disease);DOID:13580(cholestasis);DOID:1307(dementia);DOID:0050339(commensal_bacterial_infectious_disease);DOID:0002116(pterygium);DOID:1240(leukemia);DOID:14499(Fabry_disease);DOID:4138(bile_duct_disease);DOID:10591(pre_eclampsia);DOID:934(…	R_HSA_1474244(Extracellular_matrix_organization);R_HSA_1280215(Cytokine_Signaling_in_Immune_system);R_HSA_6783783(Interleukin_10_signaling);R_HSA_198933(Immunoregulatory_interactions_between_a_Lymphoid_and_a_non_Lymphoid_cell);R_HSA_168256(Immune_System);R_HSA_877300(Interferon_gamma_signaling);R_HSA_1280218(Adaptive_Immune_System);R_HSA_913531(Interferon_Signaling);R_HSA_6785807(Interleukin_4_an…	2.12991	2.29967	1.51161	9.21608	9.47764	6.60366	0.234854	-2.09016	1.2542e-24	4.25637e-22	down	yes
ENSG00000151176	PLBD2	60214;60216;60215;60213	ENST00000280800;ENST00000547163;ENST00000548997;ENST00000545182	GO:0004620(phospholipase activity);GO:0005515(protein binding);GO:0005764(lysosome);GO:0006629(lipid metabolic process);GO:0016042(lipid catabolic process);GO:0016787(hydrolase activity);GO:0043202(lysosomal lumen);GO:0070062(extracellular exosome);GO:0070062(extracellular exosome)	NA	NA	NA	phospholipase B domain containing 2 [Source:HGNC Symbol;Acc:HGNC:27283]	protein_coding;processed_transcript;nonsense_mediated_decay	NA	NA	2.76034	3.73727	4.76687	16.8813	17.0135	12.7063	0.241721	-2.04858	1.31736e-24	4.42771e-22	down	yes
ENSG00000083857	FAT1	179752;179764;179761;179755;179756;179762;179754;179758;179760;179757;179759	ENST00000441802;ENST00000509647;ENST00000503253;ENST00000512772;ENST00000507105;ENST00000508035;ENST00000500085;ENST00000509927;ENST00000512347;ENST00000509537;ENST00000507662	GO:0002088(lens development in camera-type eye);GO:0003382(epithelial cell morphogenesis);GO:0003412(establishment of epithelial cell apical/basal polarity involved in camera-type eye morphogenesis);GO:0005509(calcium ion binding);GO:0005515(protein binding);GO:0005634(nucleus);GO:0005737(cytoplasm);GO:0005886(plasma membrane);GO:0005887(integral component of plasma membrane);GO:0005911(cell-cell…	NA	NA	NA	FAT atypical cadherin 1 [Source:HGNC Symbol;Acc:HGNC:3595]	protein_coding;retained_intron;processed_transcript;nonsense_mediated_decay	DOID:4(disease);DOID:3312(bipolar_disorder);DOID:162(cancer);DOID:14566(disease_of_cellular_proliferation);DOID:1561(cognitive_disorder);DOID:3324(mood_disorder);DOID:150(disease_of_mental_health)	NA	6.18211	6.0952	8.15885	22.8091	23.6989	17.3302	0.320124	-1.6433	1.80311e-24	6.00264e-22	down	yes
ENSG00000159840	ZYX	211081;211080;211085;211083;211084;211089;211082;211090	ENST00000322764;ENST00000449630;ENST00000392910;ENST00000457235;ENST00000354434;ENST00000446634;ENST00000468083;ENST00000497119	GO:0001725(stress fiber);GO:0003723(RNA binding);GO:0005515(protein binding);GO:0005634(nucleus);GO:0005737(cytoplasm);GO:0005829(cytosol);GO:0005856(cytoskeleton);GO:0005912(adherens junction);GO:0005925(focal adhesion);GO:0007155(cell adhesion);GO:0007160(cell-matrix adhesion);GO:0007165(signal transduction);GO:0007179(transforming growth factor beta receptor signaling pathway);GO:0007229(integ…	04510(Focal adhesion);04510(Focal adhesion)	K06273	NA	zyxin [Source:HGNC Symbol;Acc:HGNC:13200]	protein_coding;retained_intron	NA	NA	6.03693	7.48929	9.33296	31.3768	30.0728	22.9199	0.270941	-1.88395	2.06843e-24	6.82094e-22	down	yes
ENSG00000030582	GRN	101720;101717;101705;101714;101707;101715;101712;101725;101723;101706;101710;101708;101726;101711;101719;101722;101724	ENST00000586782;ENST00000053867;ENST00000588170;ENST00000592783;ENST00000587109;ENST00000587387;ENST00000592323;ENST00000585348;ENST00000586443;ENST00000589536;ENST00000593167;ENST00000587518;ENST00000586242;ENST00000585512;ENST00000587958;ENST00000590984;ENST00000589923	GO:0002265(astrocyte activation involved in immune response);GO:0002282(microglial cell activation involved in immune response);GO:0003723(RNA binding);GO:0005125(cytokine activity);GO:0005515(protein binding);GO:0005576(extracellular region);GO:0005615(extracellular space);GO:0005764(lysosome);GO:0005765(lysosomal membrane);GO:0005768(endosome);GO:0005770(late endosome);GO:0005783(endoplasmic re…	NA	NA	NA	granulin precursor [Source:HGNC Symbol;Acc:HGNC:4601]	nonsense_mediated_decay;protein_coding;retained_intron;processed_transcript	DOID:230(lateral_sclerosis);DOID:0080001(bone_disease);DOID:684(hepatocellular_carcinoma);DOID:1307(dementia);DOID:2394(ovarian_cancer);DOID:1240(leukemia);DOID:2531(hematologic_cancer);DOID:12217(Lewy_body_dementia);DOID:654(overnutrition);DOID:17(musculoskeletal_system_disease);DOID:2377(multiple_sclerosis);DOID:225(syndrome);DOID:0050687(cell_type_cancer);DOID:936(brain_disease);DOID:3571(live…	R_HSA_168249(Innate_Immune_System);R_HSA_168256(Immune_System);R_HSA_6798695(Neutrophil_degranulation)	12.4458	18.3491	19.6166	74.1871	66.8735	52.4354	0.26053	-1.94048	2.26692e-24	7.40564e-22	down	yes
ENSG00000158615	PPP1R15B	24846	ENST00000367188	GO:0000164(protein phosphatase type 1 complex);GO:0001933(negative regulation of protein phosphorylation);GO:0005515(protein binding);GO:0005737(cytoplasm);GO:0005783(endoplasmic reticulum);GO:0006417(regulation of translation);GO:0006979(response to oxidative stress);GO:0006983(ER overload response);GO:0019888(protein phosphatase regulator activity);GO:0032516(positive regulation of phosphoprote…	NA	K17558	NA	protein phosphatase 1 regulatory subunit 15B [Source:HGNC Symbol;Acc:HGNC:14951]	protein_coding	NA	NA	9.45431	13.0469	9.82424	43.6305	36.7803	32.2552	0.286915	-1.80131	2.6463e-24	8.56496e-22	down	yes
ENSG00000162104	ADCY9	85355;85357;85360;85356;85358;85354;85359	ENST00000294016;ENST00000575550;ENST00000572288;ENST00000574721;ENST00000571467;ENST00000576936;ENST00000571889	GO:0000166(nucleotide binding);GO:0003091(renal water homeostasis);GO:0004016(adenylate cyclase activity);GO:0005524(ATP binding);GO:0005886(plasma membrane);GO:0005887(integral component of plasma membrane);GO:0006171(cAMP biosynthetic process);GO:0007165(signal transduction);GO:0007186(G protein-coupled receptor signaling pathway);GO:0007189(adenylate cyclase-activating G protein-coupled recept…	00230(Purine metabolism);01522(Endocrine resistance);04015(Rap1 signaling pathway);04020(Calcium signaling pathway);04022(cGMP-PKG signaling pathway);04024(cAMP signaling pathway);04062(Chemokine signaling pathway);04072(Phospholipase D signaling pathway);04114(Oocyte meiosis);04211(Longevity regulating pathway);04213(Longevity regulating pathway - multiple species);04261(Adrenergic signaling in …	NA	NA	adenylate cyclase 9 [Source:HGNC Symbol;Acc:HGNC:240]	protein_coding;processed_transcript;retained_intron;nonsense_mediated_decay	DOID:4(disease);DOID:3312(bipolar_disorder);DOID:1561(cognitive_disorder);DOID:3324(mood_disorder);DOID:150(disease_of_mental_health)	R_HSA_9662851(Anti_inflammatory_response_favouring_Leishmania_parasite_infection);R_HSA_1489509(DAG_and_IP3_signaling);R_HSA_977443(GABA_receptor_activation);R_HSA_163685(Integration_of_energy_metabolism);R_HSA_9660821(ADORA2B_mediated_anti_inflammatory_cytokines_production);R_HSA_382551(Transport_of_small_molecules);R_HSA_9006925(Intracellular_signaling_by_second_messengers);R_HSA_991365(Activat…	1.64049	1.8019	1.69407	5.37652	5.97694	4.22319	0.329754	-1.60054	2.71501e-24	8.70673e-22	down	yes
ENSG00000167600	CYP2S1	121059;121063;121058;121061;121062;121060	ENST00000310054;ENST00000593890;ENST00000597754;ENST00000600561;ENST00000595590;ENST00000593545	GO:0004497(monooxygenase activity);GO:0004796(thromboxane-A synthase activity);GO:0005506(iron ion binding);GO:0005515(protein binding);GO:0005737(cytoplasm);GO:0005783(endoplasmic reticulum);GO:0005789(endoplasmic reticulum membrane);GO:0006082(organic acid metabolic process);GO:0006629(lipid metabolic process);GO:0006631(fatty acid metabolic process);GO:0006690(icosanoid metabolic process);GO:0…	00830(Retinol metabolism);00980(Metabolism of xenobiotics by cytochrome P450);00980(Metabolism of xenobiotics by cytochrome P450)	K07420	EC:1.14.14.1	cytochrome P450 family 2 subfamily S member 1 [Source:HGNC Symbol;Acc:HGNC:15654]	protein_coding;nonsense_mediated_decay	NA	R_HSA_211999(CYP2E1_reactions);R_HSA_211859(Biological_oxidations);R_HSA_211981(Xenobiotics);R_HSA_211945(Phase_I_Functionalization_of_compounds);R_HSA_211897(Cytochrome_P450_arranged_by_substrate_type);R_HSA_211958(Miscellaneous_substrates);R_HSA_1430728(Metabolism)	6.17047	8.73103	7.38596	28.115	28.4295	21.6163	0.285149	-1.81021	2.8851e-24	9.16806e-22	down	yes
ENSG00000108175	ZMIZ1	32605;32609;32608;32607	ENST00000334512;ENST00000446377;ENST00000478357;ENST00000472035	GO:0001570(vasculogenesis);GO:0001701(in utero embryonic development);GO:0003007(heart morphogenesis);GO:0003713(transcription coactivator activity);GO:0005634(nucleus);GO:0005654(nucleoplasm);GO:0005737(cytoplasm);GO:0007179(transforming growth factor beta receptor signaling pathway);GO:0007296(vitellogenesis);GO:0007569(cell aging);GO:0008270(zinc ion binding);GO:0021852(pyramidal neuron migrat…	NA	K22403	NA	zinc finger MIZ-type containing 1 [Source:HGNC Symbol;Acc:HGNC:16493]	protein_coding;processed_transcript	DOID:1240(leukemia);DOID:2531(hematologic_cancer);DOID:1037(lymphoblastic_leukemia);DOID:4(disease);DOID:162(cancer);DOID:14566(disease_of_cellular_proliferation);DOID:0060083(immune_system_cancer);DOID:0050686(organ_system_cancer)	NA	3.75679	4.82538	5.64138	18.1904	17.7274	13.539	0.287595	-1.79789	3.02555e-24	9.52775e-22	down	yes
ENSG00000104332	SFRP1	215196;215197	ENST00000220772;ENST00000379845	GO:0001649(osteoblast differentiation);GO:0001657(ureteric bud development);GO:0001756(somitogenesis);GO:0001843(neural tube closure);GO:0001954(positive regulation of cell-matrix adhesion);GO:0002244(hematopoietic progenitor cell differentiation);GO:0004197(cysteine-type endopeptidase activity);GO:0005109(frizzled binding);GO:0005515(protein binding);GO:0005576(extracellular region);GO:0005615(e…	04310(Wnt signaling pathway);04310(Wnt signaling pathway)	NA	NA	secreted frizzled related protein 1 [Source:HGNC Symbol;Acc:HGNC:10776]	protein_coding	DOID:8501(fundus_dystrophy);DOID:684(hepatocellular_carcinoma);DOID:3996(urinary_system_cancer);DOID:1240(leukemia);DOID:2531(hematologic_cancer);DOID:1324(lung_cancer);DOID:5679(retinal_disease);DOID:225(syndrome);DOID:0050687(cell_type_cancer);DOID:3571(liver_cancer);DOID:1037(lymphoblastic_leukemia);DOID:4(disease);DOID:10534(stomach_cancer);DOID:1749(squamous_cell_carcinoma);DOID:77(gastroint…	R_HSA_201681(TCF_dependent_signaling_in_response_to_WNT);R_HSA_195721(Signaling_by_WNT);R_HSA_3772470(Negative_regulation_of_TCF_dependent_signaling_by_WNT_ligand_antagonists);R_HSA_162582(Signal_Transduction)	7.91899	8.29067	8.27642	24.5311	25.7356	18.3226	0.356996	-1.48602	3.28255e-24	1.02448e-21	down	yes
ENSG00000137193	PIM1	194759;194760	ENST00000373509;ENST00000468243	GO:0000166(nucleotide binding);GO:0004672(protein kinase activity);GO:0004674(protein serine/threonine kinase activity);GO:0005515(protein binding);GO:0005524(ATP binding);GO:0005634(nucleus);GO:0005654(nucleoplasm);GO:0005730(nucleolus);GO:0005737(cytoplasm);GO:0005829(cytosol);GO:0005886(plasma membrane);GO:0006468(protein phosphorylation);GO:0006915(apoptotic process);GO:0007049(cell cycle);GO…	04630(Jak-STAT signaling pathway);04933(AGE-RAGE signaling pathway in diabetic complications);05200(Pathways in cancer);05206(MicroRNAs in cancer);05221(Acute myeloid leukemia);05221(Acute myeloid leukemia)	K04702	EC:2.7.11.1	Pim-1 proto-oncogene, serine/threonine kinase [Source:HGNC Symbol;Acc:HGNC:8986]	protein_coding;processed_transcript	DOID:1240(leukemia);DOID:2531(hematologic_cancer);DOID:0050687(cell_type_cancer);DOID:4(disease);DOID:0050828(artery_disease);DOID:1749(squamous_cell_carcinoma);DOID:170(endocrine_gland_cancer);DOID:3498(pancreatic_ductal_adenocarcinoma);DOID:162(cancer);DOID:14566(disease_of_cellular_proliferation);DOID:10763(hypertension);DOID:1287(cardiovascular_system_disease);DOID:0060083(immune_system_cance…	R_HSA_9703465(Signaling_by_FLT3_fusion_proteins);R_HSA_1280215(Cytokine_Signaling_in_Immune_system);R_HSA_168256(Immune_System);R_HSA_9703648(Signaling_by_FLT3_ITD_and_TKD_mutants);R_HSA_9702518(STAT5_activation_downstream_of_FLT3_ITD_mutants);R_HSA_6785807(Interleukin_4_and_Interleukin_13_signaling);R_HSA_449147(Signaling_by_Interleukins);R_HSA_1643685(Disease);R_HSA_9682385(FLT3_signaling_in_di…	6.5445	9.30712	4.76484	36.8254	31.3718	28.7999	0.212547	-2.23414	3.42669e-24	1.06e-21	down	yes
ENSG00000107341	UBE2R2	223054	ENST00000263228	GO:0000166(nucleotide binding);GO:0000209(protein polyubiquitination);GO:0004842(ubiquitin-protein transferase activity);GO:0005515(protein binding);GO:0005524(ATP binding);GO:0005829(cytosol);GO:0006511(ubiquitin-dependent protein catabolic process);GO:0006513(protein monoubiquitination);GO:0016567(protein ubiquitination);GO:0016740(transferase activity);GO:0061631(ubiquitin conjugating enzyme a…	04120(Ubiquitin mediated proteolysis)	K02207	EC:2.3.2.23	ubiquitin conjugating enzyme E2 R2 [Source:HGNC Symbol;Acc:HGNC:19907]	protein_coding	NA	R_HSA_983169(Class_I_MHC_mediated_antigen_processing_&_presentation);R_HSA_597592(Post_translational_protein_modification);R_HSA_8852135(Protein_ubiquitination);R_HSA_168256(Immune_System);R_HSA_8866652(Synthesis_of_active_ubiquitin:_roles_of_E1_and_E2_enzymes);R_HSA_983168(Antigen_processing:_Ubiquitination_&_Proteasome_degradation);R_HSA_392499(Metabolism_of_proteins);R_HSA_1280218(Adaptive_Imm…	10.401	12.7457	12.5626	37.9387	37.5182	29.9739	0.338699	-1.56193	4.1297e-24	1.26626e-21	down	yes
ENSG00000004399	PLXND1	165187;165193;165192;165191;165194;165186;165195;165188;165185;165184;165190;165197;165189;165200;165196;165198	ENST00000324093;ENST00000503166;ENST00000504979;ENST00000512807;ENST00000514990;ENST00000504524;ENST00000504767;ENST00000512744;ENST00000504689;ENST00000501038;ENST00000508630;ENST00000515191;ENST00000506979;ENST00000505237;ENST00000511018;ENST00000505505	GO:0001525(angiogenesis);GO:0001569(branching involved in blood vessel morphogenesis);GO:0001822(kidney development);GO:0002116(semaphorin receptor complex);GO:0003151(outflow tract morphogenesis);GO:0003279(cardiac septum development);GO:0005515(protein binding);GO:0005886(plasma membrane);GO:0005887(integral component of plasma membrane);GO:0007162(negative regulation of cell adhesion);GO:00071…	NA	K06822	NA	plexin D1 [Source:HGNC Symbol;Acc:HGNC:9107]	protein_coding;retained_intron;nonsense_mediated_decay	DOID:225(syndrome);DOID:4(disease);DOID:162(cancer);DOID:863(nervous_system_disease);DOID:14566(disease_of_cellular_proliferation);DOID:1756(facial_nerve_disease);DOID:13501(Mobius_syndrome);DOID:5656(cranial_nerve_disease);DOID:870(neuropathy);DOID:7(disease_of_anatomical_entity)	R_HSA_194315(Signaling_by_Rho_GTPases);R_HSA_9012999(RHO_GTPase_cycle);R_HSA_157118(Signaling_by_NOTCH);R_HSA_9013508(NOTCH3_Intracellular_Domain_Regulates_Transcription);R_HSA_373755(Semaphorin_interactions);R_HSA_9716542(Signaling_by_Rho_GTPases,_Miro_GTPases_and_RHOBTB3);R_HSA_416700(Other_semaphorin_interactions);R_HSA_1266738(Developmental_Biology);R_HSA_9012852(Signaling_by_NOTCH3);R_HSA_16…	4.7981	4.77653	5.31315	14.2478	15.021	11.1854	0.368016	-1.44216	5.27621e-24	1.60374e-21	down	yes
ENSG00000118816	CCNI	174399;174404;174406;174403;174401;174407;174405;174400	ENST00000237654;ENST00000504697;ENST00000507788;ENST00000505609;ENST00000506614;ENST00000515790;ENST00000513774;ENST00000515468	GO:0000079(regulation of cyclin-dependent protein serine/threonine kinase activity);GO:0000307(cyclin-dependent protein kinase holoenzyme complex);GO:0005515(protein binding);GO:0005634(nucleus);GO:0005737(cytoplasm);GO:0007283(spermatogenesis);GO:0016020(membrane);GO:0016538(cyclin-dependent protein serine/threonine kinase regulator activity);GO:0031965(nuclear membrane);GO:0044772(mitotic cell …	NA	NA	NA	cyclin I [Source:HGNC Symbol;Acc:HGNC:1595]	protein_coding;processed_transcript;retained_intron	DOID:4(disease);DOID:170(endocrine_gland_cancer);DOID:162(cancer);DOID:14566(disease_of_cellular_proliferation);DOID:4905(pancreatic_carcinoma);DOID:1793(pancreatic_cancer);DOID:0050686(organ_system_cancer)	NA	22.597	27.255	23.1317	78.6686	74.7932	59.0519	0.34343	-1.54191	5.37992e-24	1.62116e-21	down	yes
ENSG00000197102	DYNC1H1	74008;74012;74024;74014;74026;74032;74044;74037;74050;74023;74047;74030;74027;74034;74048;74028;74017;74039;74043;74031;74015;74042;74022;74018;74051;74011;74052;74049;74013;74007;74016;74038;74041;74029;74020;74046;74019;74040	ENST00000360184;ENST00000643508;ENST00000645697;ENST00000643565;ENST00000642882;ENST00000643829;ENST00000643591;ENST00000644794;ENST00000647143;ENST00000554854;ENST00000646418;ENST00000553423;ENST00000647307;ENST00000647204;ENST00000642716;ENST00000643437;ENST00000645114;ENST00000556139;ENST00000644239;ENST00000556791;ENST00000644206;ENST00000644888;ENST00000647119;ENST00000643279;ENST00000643729…	GO:0000086(G2/M transition of mitotic cell cycle);GO:0000166(nucleotide binding);GO:0000278(mitotic cell cycle);GO:0003723(RNA binding);GO:0003774(motor activity);GO:0003777(microtubule motor activity);GO:0005515(protein binding);GO:0005524(ATP binding);GO:0005576(extracellular region);GO:0005737(cytoplasm);GO:0005813(centrosome);GO:0005829(cytosol);GO:0005856(cytoskeleton);GO:0005868(cytoplasmic…	04145(Phagosome);04962(Vasopressin-regulated water reabsorption);05132(Salmonella infection);05132(Salmonella infection)	K10413	NA	dynein cytoplasmic 1 heavy chain 1 [Source:HGNC Symbol;Acc:HGNC:2961]	protein_coding;retained_intron;processed_transcript;nonsense_mediated_decay	NA	R_HSA_2262752(Cellular_responses_to_stress);R_HSA_194315(Signaling_by_Rho_GTPases);R_HSA_9646399(Aggrephagy);R_HSA_9609646(HCMV_Infection);R_HSA_6811442(Intra_Golgi_and_retrograde_Golgi_to_ER_traffic);R_HSA_141444(Amplification__of_signal_from_unattached__kinetochores_via_a_MAD2__inhibitory_signal);R_HSA_446203(Asparagine_N_linked_glycosylation);R_HSA_8854518(AURKA_Activation_by_TPX2);R_HSA_96480…	5.05203	4.47985	6.05306	17.0064	16.3797	12.4504	0.340011	-1.55635	8.16089e-24	2.43815e-21	down	yes
ENSG00000148841	ITPRIP	34470;34469;34472;34473	ENST00000337478;ENST00000278071;ENST00000358187;ENST00000647721	GO:0004860(protein kinase inhibitor activity);GO:0005515(protein binding);GO:0005634(nucleus);GO:0005640(nuclear outer membrane);GO:0005886(plasma membrane);GO:0006469(negative regulation of protein kinase activity);GO:0016020(membrane);GO:0016021(integral component of membrane);GO:1902042(negative regulation of extrinsic apoptotic signaling pathway via death domain receptors);GO:1902042(negative…	NA	NA	NA	inositol 1,4,5-trisphosphate receptor interacting protein [Source:HGNC Symbol;Acc:HGNC:29370]	protein_coding	NA	NA	2.77198	3.48145	2.45735	11.3937	10.4903	8.35788	0.288037	-1.79567	1.17928e-23	3.49337e-21	down	yes
ENSG00000130175	PRKCSH	115541;115538;115546;115536;115531;115547;115542;115544;115537;115545;115540;115543;115532;115549;115534;115539;115548	ENST00000589838;ENST00000592741;ENST00000586486;ENST00000593104;ENST00000591462;ENST00000587290;ENST00000589990;ENST00000592445;ENST00000593053;ENST00000585540;ENST00000587327;ENST00000585325;ENST00000591946;ENST00000592435;ENST00000588269;ENST00000593101;ENST00000590098	GO:0001701(in utero embryonic development);GO:0001889(liver development);GO:0003723(RNA binding);GO:0005080(protein kinase C binding);GO:0005509(calcium ion binding);GO:0005515(protein binding);GO:0005783(endoplasmic reticulum);GO:0005788(endoplasmic reticulum lumen);GO:0006457(protein folding);GO:0006491(N-glycan processing);GO:0006807(nitrogen compound metabolic process);GO:0010977(negative reg…	04141(Protein processing in endoplasmic reticulum);04141(Protein processing in endoplasmic reticulum)	NA	NA	protein kinase C substrate 80K-H [Source:HGNC Symbol;Acc:HGNC:9411]	protein_coding;nonsense_mediated_decay;processed_transcript;retained_intron	DOID:4(disease);DOID:409(liver_disease);DOID:77(gastrointestinal_system_disease);DOID:4194(glucose_metabolism_disease);DOID:0014667(disease_of_metabolism);DOID:0060158(acquired_metabolic_disease);DOID:9351(diabetes_mellitus);DOID:3118(hepatobiliary_disease);DOID:0050013(carbohydrate_metabolism_disease);DOID:7(disease_of_anatomical_entity)	R_HSA_446203(Asparagine_N_linked_glycosylation);R_HSA_901042(Calnexin/calreticulin_cycle);R_HSA_9694516(SARS_CoV_2_Infection);R_HSA_597592(Post_translational_protein_modification);R_HSA_532668(N_glycan_trimming_in_the_ER_and_Calnexin/Calreticulin_cycle);R_HSA_168249(Innate_Immune_System);R_HSA_168256(Immune_System);R_HSA_9683686(Maturation_of_spike_protein);R_HSA_9683701(Translation_of_structural…	8.80462	11.3357	12.0489	38.8281	36.3053	28.53	0.310516	-1.68726	1.54253e-23	4.53102e-21	down	yes
ENSG00000175215	CTDSP2	56535;56540;56541;56537;56543;56539;56538	ENST00000398073;ENST00000551594;ENST00000550144;ENST00000547169;ENST00000552294;ENST00000547701;ENST00000549039	GO:0001933(negative regulation of protein phosphorylation);GO:0004721(phosphoprotein phosphatase activity);GO:0005515(protein binding);GO:0005634(nucleus);GO:0005654(nucleoplasm);GO:0006470(protein dephosphorylation);GO:0008420(RNA polymerase II CTD heptapeptide repeat phosphatase activity);GO:0016311(dephosphorylation);GO:0016787(hydrolase activity);GO:0016791(phosphatase activity);GO:0036498(IR…	NA	NA	NA	CTD small phosphatase 2 [Source:HGNC Symbol;Acc:HGNC:17077]	protein_coding;nonsense_mediated_decay;retained_intron	NA	R_HSA_381070(IRE1alpha_activates_chaperones);R_HSA_392499(Metabolism_of_proteins);R_HSA_381038(XBP1(S)_activates_chaperone_genes);R_HSA_381119(Unfolded_Protein_Response_(UPR))	14.7067	12.2575	14.085	40.2164	37.5143	30.7159	0.378521	-1.40155	2.09162e-23	6.09272e-21	down	yes
ENSG00000096433	ITPR3	194356;194355	ENST00000605930;ENST00000374316	GO:0000822(inositol hexakisphosphate binding);GO:0005216(ion channel activity);GO:0005220(inositol 1,4,5-trisphosphate-sensitive calcium-release channel activity);GO:0005262(calcium channel activity);GO:0005509(calcium ion binding);GO:0005515(protein binding);GO:0005634(nucleus);GO:0005640(nuclear outer membrane);GO:0005654(nucleoplasm);GO:0005730(nucleolus);GO:0005737(cytoplasm);GO:0005783(endop…	04020(Calcium signaling pathway);04022(cGMP-PKG signaling pathway);04070(Phosphatidylinositol signaling system);04114(Oocyte meiosis);04210(Apoptosis);04218(Cellular senescence);04270(Vascular smooth muscle contraction);04371(Apelin signaling pathway);04540(Gap junction);04611(Platelet activation);04621(NOD-like receptor signaling pathway);04625(C-type lectin receptor signaling pathway);04713(Cir…	K04960	NA	inositol 1,4,5-trisphosphate receptor type 3 [Source:HGNC Symbol;Acc:HGNC:6182]	protein_coding	DOID:17(musculoskeletal_system_disease);DOID:225(syndrome);DOID:4(disease);DOID:10534(stomach_cancer);DOID:75(lymphatic_system_disease);DOID:12894(Sjogren's_syndrome);DOID:1289(neurodegenerative_disease);DOID:4194(glucose_metabolism_disease);DOID:417(hypersensitivity_reaction_type_II_disease);DOID:0014667(disease_of_metabolism);DOID:162(cancer);DOID:8857(lupus_erythematosus);DOID:9352(type_2_diab…	R_HSA_9662851(Anti_inflammatory_response_favouring_Leishmania_parasite_infection);R_HSA_1489509(DAG_and_IP3_signaling);R_HSA_163685(Integration_of_energy_metabolism);R_HSA_418346(Platelet_homeostasis);R_HSA_983695(Antigen_activates_B_Cell_Receptor_(BCR)_leading_to_generation_of_second_messengers);R_HSA_5621481(C_type_lectin_receptors_(CLRs));R_HSA_5607763(CLEC7A_(Dectin_1)_induces_NFAT_activation…	5.64202	6.35361	6.75541	20.3439	19.7808	14.3383	0.34429	-1.5383	2.27053e-23	6.55921e-21	down	yes
ENSG00000101224	CDC25B	143296;143297;143299;143300;143293;143295;143298;143301	ENST00000245960;ENST00000439880;ENST00000480816;ENST00000468979;ENST00000344256;ENST00000467519;ENST00000340833;ENST00000495915	GO:0000086(G2/M transition of mitotic cell cycle);GO:0000278(mitotic cell cycle);GO:0000922(spindle pole);GO:0001556(oocyte maturation);GO:0004721(phosphoprotein phosphatase activity);GO:0004725(protein tyrosine phosphatase activity);GO:0005515(protein binding);GO:0005634(nucleus);GO:0005654(nucleoplasm);GO:0005737(cytoplasm);GO:0005813(centrosome);GO:0005815(microtubule organizing center);GO:000…	04010(MAPK signaling pathway);04110(Cell cycle);04914(Progesterone-mediated oocyte maturation);05206(MicroRNAs in cancer);05206(MicroRNAs in cancer)	NA	NA	cell division cycle 25B [Source:HGNC Symbol;Acc:HGNC:1726]	protein_coding;processed_transcript	DOID:1612(breast_cancer);DOID:28(endocrine_system_disease);DOID:1324(lung_cancer);DOID:3111(cystadenocarcinoma);DOID:0050687(cell_type_cancer);DOID:4(disease);DOID:1781(thyroid_cancer);DOID:170(endocrine_gland_cancer);DOID:3459(breast_carcinoma);DOID:3905(lung_carcinoma);DOID:162(cancer);DOID:10011(thyroid_lymphoma);DOID:3908(non_small_cell_lung_carcinoma);DOID:14566(disease_of_cellular_prolifera…	R_HSA_9645723(Diseases_of_programmed_cell_death);R_HSA_8863678(Neurodegenerative_Diseases);R_HSA_8862803(Deregulated_CDK5_triggers_multiple_neurodegenerative_pathways_in_Alzheimer's_disease_models);R_HSA_69275(G2/M_Transition);R_HSA_1640170(Cell_Cycle);R_HSA_69242(S_Phase);R_HSA_453274(Mitotic_G2_G2/M_phases);R_HSA_69278(Cell_Cycle,_Mitotic);R_HSA_69656(Cyclin_A:Cdk2_associated_events_at_S_phase_…	27.5554	33.665	30.5481	99.2	91.7126	72.5866	0.348269	-1.52173	2.95489e-23	8.46625e-21	down	yes
ENSG00000243649	CFB	193758;193757;193760;193764;193761;193765;193763;193762;193766;193767;193769;193768	ENST00000425368;ENST00000472581;ENST00000452035;ENST00000482886;ENST00000461483;ENST00000483004;ENST00000465750;ENST00000497841;ENST00000467150;ENST00000467360;ENST00000498317;ENST00000482312	GO:0001848(complement binding);GO:0002376(immune system process);GO:0004252(serine-type endopeptidase activity);GO:0005515(protein binding);GO:0005576(extracellular region);GO:0005615(extracellular space);GO:0005886(plasma membrane);GO:0006508(proteolysis);GO:0006956(complement activation);GO:0006957(complement activation, alternative pathway);GO:0008233(peptidase activity);GO:0008236(serine-type…	04610(Complement and coagulation cascades);05150(Staphylococcus aureus infection);05150(Staphylococcus aureus infection)	NA	NA	complement factor B [Source:HGNC Symbol;Acc:HGNC:1037]	protein_coding;retained_intron;processed_transcript	DOID:5679(retinal_disease);DOID:225(syndrome);DOID:4(disease);DOID:4195(hyperglycemia);DOID:720(normocytic_anemia);DOID:4448(macular_degeneration);DOID:8466(retinal_degeneration);DOID:4194(glucose_metabolism_disease);DOID:0014667(disease_of_metabolism);DOID:12554(hemolytic_uremic_syndrome);DOID:2007(degeneration_of_macula_and_posterior_pole);DOID:863(nervous_system_disease);DOID:1492(eye_and_adne…	R_HSA_166658(Complement_cascade);R_HSA_173736(Alternative_complement_activation);R_HSA_168249(Innate_Immune_System);R_HSA_168256(Immune_System);R_HSA_174577(Activation_of_C3_and_C5);R_HSA_166663(Initial_triggering_of_complement);R_HSA_977606(Regulation_of_Complement_cascade)	2.84462	2.35131	1.77269	9.18574	8.65302	8.31554	0.266442	-1.9081	3.00867e-23	8.55026e-21	down	yes
ENSG00000280614	FP236383	148449	ENST00000625598	NA	NA	NA	NA	novel transcript, similar to YY1 associated myogenesis RNA 1 YAM1	lncRNA	NA	NA	11484.2	6648.3	3773.82	377.499	289.463	320.565	22.183	4.47138	3.0429e-23	8.57779e-21	up	yes
ENSG00000105329	TGFB1	121098;121100;121092;121099	ENST00000221930;ENST00000597453;ENST00000598758;ENST00000600196	GO:0000122(negative regulation of transcription by RNA polymerase II);GO:0001570(vasculogenesis);GO:0001657(ureteric bud development);GO:0001666(response to hypoxia);GO:0001763(morphogenesis of a branching structure);GO:0001775(cell activation);GO:0001837(epithelial to mesenchymal transition);GO:0001843(neural tube closure);GO:0002028(regulation of sodium ion transport);GO:0002460(adaptive immune…	04010(MAPK signaling pathway);04060(Cytokine-cytokine receptor interaction);04068(FoxO signaling pathway);04110(Cell cycle);04218(Cellular senescence);04350(TGF-beta signaling pathway);04380(Osteoclast differentiation);04390(Hippo signaling pathway);04659(Th17 cell differentiation);04672(Intestinal immune network for IgA production);04926(Relaxin signaling pathway);04932(Non-alcoholic fatty liver…	K13375	NA	transforming growth factor beta 1 [Source:HGNC Symbol;Acc:HGNC:11766]	protein_coding;retained_intron	DOID:2841(asthma);DOID:76(stomach_disease);DOID:18(urinary_system_disease);DOID:1176(bronchial_disease);DOID:0080001(bone_disease);DOID:4798(aggressive_systemic_mastocytosis);DOID:0060037(developmental_disorder_of_mental_health);DOID:684(hepatocellular_carcinoma);DOID:3996(urinary_system_cancer);DOID:12205(dengue_disease);DOID:1307(dementia);DOID:5223(infertility);DOID:2394(ovarian_cancer);DOID:0…	R_HSA_212436(Generic_Transcription_Pathway);R_HSA_8951936(RUNX3_regulates_p14_ARF);R_HSA_3304351(Signaling_by_TGF_beta_Receptor_Complex_in_Cancer);R_HSA_2173788(Downregulation_of_TGF_beta_receptor_signaling);R_HSA_3656535(TGFBR1_LBD_Mutants_in_Cancer);R_HSA_597592(Post_translational_protein_modification);R_HSA_1474244(Extracellular_matrix_organization);R_HSA_8941858(Regulation_of_RUNX3_expression…	13.0757	17.1939	19.5057	62.6417	57.5666	47.4288	0.296923	-1.75184	3.98078e-23	1.11319e-20	down	yes
ENSG00000135924	DNAJB2	140806;140804;140818;140807;140808;140813;140817;140815;140809;140811;140819;140805;140816	ENST00000336576;ENST00000392086;ENST00000472019;ENST00000480537;ENST00000477917;ENST00000481815;ENST00000473750;ENST00000463463;ENST00000482988;ENST00000442681;ENST00000476254;ENST00000421532;ENST00000487855	GO:0000502(proteasome complex);GO:0001671(ATPase activator activity);GO:0005515(protein binding);GO:0005634(nucleus);GO:0005737(cytoplasm);GO:0005783(endoplasmic reticulum);GO:0005789(endoplasmic reticulum membrane);GO:0005829(cytosol);GO:0006986(response to unfolded protein);GO:0008285(negative regulation of cell population proliferation);GO:0016020(membrane);GO:0030308(negative regulation of ce…	04141(Protein processing in endoplasmic reticulum);04141(Protein processing in endoplasmic reticulum)	K09508	NA	DnaJ heat shock protein family (Hsp40) member B2 [Source:HGNC Symbol;Acc:HGNC:5228]	protein_coding;retained_intron;processed_transcript	DOID:4(disease);DOID:1289(neurodegenerative_disease);DOID:863(nervous_system_disease);DOID:12858(Huntington's_disease);DOID:331(central_nervous_system_disease);DOID:7(disease_of_anatomical_entity)	NA	3.446	2.88561	3.01561	9.58231	9.06018	7.78672	0.35367	-1.49952	5.257e-23	1.4584e-20	down	yes
ENSG00000259529	AL136295	68007	ENST00000558468	GO:0004842(ubiquitin-protein transferase activity);GO:0016567(protein ubiquitination);GO:0046872(metal ion binding);GO:0071797(LUBAC complex)	NA	NA	NA	novel transcript	nonsense_mediated_decay	NA	NA	3.77819	4.69913	4.75166	1.27847	0.959764	1.0088	4.07418	2.02651	5.46327e-23	1.50355e-20	up	yes
ENSG00000184545	DUSP8	36613;36612;36614	ENST00000397374;ENST00000331588;ENST00000528778	GO:0000188(inactivation of MAPK activity);GO:0004721(phosphoprotein phosphatase activity);GO:0004725(protein tyrosine phosphatase activity);GO:0005634(nucleus);GO:0005737(cytoplasm);GO:0005829(cytosol);GO:0006470(protein dephosphorylation);GO:0008138(protein tyrosine/serine/threonine phosphatase activity);GO:0008330(protein tyrosine/threonine phosphatase activity);GO:0016311(dephosphorylation);GO…	04010(MAPK signaling pathway);04010(MAPK signaling pathway)	K04459	3.1.3.48;EC:3.1.3.16	dual specificity phosphatase 8 [Source:HGNC Symbol;Acc:HGNC:3074]	protein_coding;processed_transcript	NA	R_HSA_5683057(MAPK_family_signaling_cascades);R_HSA_5675221(Negative_regulation_of_MAPK_pathway);R_HSA_6802957(Oncogenic_MAPK_signaling);R_HSA_9652817(Signaling_by_MAPK_mutants);R_HSA_162582(Signal_Transduction);R_HSA_112409(RAF_independent_MAPK1/3_activation);R_HSA_5673001(RAF/MAP_kinase_cascade);R_HSA_1643685(Disease);R_HSA_5663202(Diseases_of_signal_transduction_by_growth_factor_receptors_and_…	0.532934	0.633401	0.514714	3.55267	2.80381	2.02976	0.200453	-2.31866	5.50578e-23	1.50355e-20	down	yes
ENSG00000198355	PIM3	155908;155907	ENST00000360612;ENST00000467480	GO:0000166(nucleotide binding);GO:0004672(protein kinase activity);GO:0004674(protein serine/threonine kinase activity);GO:0005515(protein binding);GO:0005524(ATP binding);GO:0005737(cytoplasm);GO:0005829(cytosol);GO:0006468(protein phosphorylation);GO:0006915(apoptotic process);GO:0007049(cell cycle);GO:0007346(regulation of mitotic cell cycle);GO:0016301(kinase activity);GO:0016310(phosphorylat…	NA	K08807	EC:2.7.11.1	Pim-3 proto-oncogene, serine/threonine kinase [Source:HGNC Symbol;Acc:HGNC:19310]	protein_coding;retained_intron	NA	NA	8.05126	9.34944	6.61399	36.3811	27.5995	24.2973	0.272035	-1.87814	5.68923e-23	1.5416e-20	down	yes
ENSG00000281181	FP236383	148457	ENST00000627981	NA	NA	NA	NA	novel transcript, similar to YY1 associated myogenesis RNA 1 YAM1	lncRNA	NA	NA	12422.9	7161.6	3980.31	403.517	307.511	337.02	22.4845	4.49086	9.15633e-23	2.462e-20	up	yes
ENSG00000146555	SDK1	201757;201756;201765;201763;201762;201769;201764	ENST00000389531;ENST00000404826;ENST00000476701;ENST00000478527;ENST00000426596;ENST00000467827;ENST00000484011	GO:0005515(protein binding);GO:0005886(plasma membrane);GO:0007155(cell adhesion);GO:0007156(homophilic cell adhesion via plasma membrane adhesion molecules);GO:0007416(synapse assembly);GO:0010842(retina layer formation);GO:0016020(membrane);GO:0016021(integral component of membrane);GO:0030054(cell junction);GO:0042802(identical protein binding);GO:0045202(synapse);GO:0045216(cell-cell junction…	NA	K16353	NA	sidekick cell adhesion molecule 1 [Source:HGNC Symbol;Acc:HGNC:19307]	protein_coding;retained_intron	NA	R_HSA_446728(Cell_junction_organization);R_HSA_421270(Cell_cell_junction_organization);R_HSA_1500931(Cell_Cell_communication);R_HSA_373756(SDK_interactions)	0.401372	0.298317	0.220502	1.61085	1.56025	1.19708	0.210658	-2.24703	1.01808e-22	2.71657e-20	down	yes
ENSG00000130479	MAP1S	117247;117254;117253;117263;117258;117248;117262;117252;117243;117251;117256	ENST00000324096;ENST00000594365;ENST00000544059;ENST00000601097;ENST00000598769;ENST00000601544;ENST00000598756;ENST00000599494;ENST00000600608;ENST00000597067;ENST00000596637	GO:0000226(microtubule cytoskeleton organization);GO:0001578(microtubule bundle formation);GO:0003677(DNA binding);GO:0003779(actin binding);GO:0005515(protein binding);GO:0005634(nucleus);GO:0005654(nucleoplasm);GO:0005730(nucleolus);GO:0005737(cytoplasm);GO:0005819(spindle);GO:0005829(cytosol);GO:0005856(cytoskeleton);GO:0005874(microtubule);GO:0005875(microtubule associated complex);GO:0006259…	NA	K10429	NA	microtubule associated protein 1S [Source:HGNC Symbol;Acc:HGNC:15715]	protein_coding;nonsense_mediated_decay;retained_intron;processed_transcript	NA	NA	0.840411	1.14233	1.15	4.91042	4.77169	3.28465	0.241598	-2.04932	1.40059e-22	3.70892e-20	down	yes
ENSG00000104081	BMF	76664;76670;76666;76661;76668;76662;76665;76671;76667	ENST00000561360;ENST00000560430;ENST00000558774;ENST00000354670;ENST00000559701;ENST00000397573;ENST00000561282;ENST00000558057;ENST00000431415	GO:0001669(acrosomal vesicle);GO:0001844(protein insertion into mitochondrial membrane involved in apoptotic signaling pathway);GO:0005515(protein binding);GO:0005741(mitochondrial outer membrane);GO:0005829(cytosol);GO:0005886(plasma membrane);GO:0006915(apoptotic process);GO:0010507(negative regulation of autophagy);GO:0016459(myosin complex);GO:0031334(positive regulation of protein-containing…	05206(MicroRNAs in cancer);05206(MicroRNAs in cancer)	K17460	NA	Bcl2 modifying factor [Source:HGNC Symbol;Acc:HGNC:24132]	protein_coding;processed_transcript	NA	R_HSA_139910(Activation_of_BMF_and_translocation_to_mitochondria);R_HSA_109581(Apoptosis);R_HSA_111453(BH3_only_proteins_associate_with_and_inactivate_anti_apoptotic_BCL_2_members);R_HSA_114452(Activation_of_BH3_only_proteins);R_HSA_5357801(Programmed_Cell_Death);R_HSA_109606(Intrinsic_Pathway_for_Apoptosis)	1.87031	1.98826	1.86975	6.15908	6.26842	4.8292	0.331948	-1.59097	1.56119e-22	4.10311e-20	down	yes
ENSG00000049323	LTBP1	128493;128498;128501;128496;128499;128506;128497	ENST00000404816;ENST00000404525;ENST00000468091;ENST00000418533;ENST00000407925;ENST00000422669;ENST00000402934	GO:0001527(microfibril);GO:0003281(ventricular septum development);GO:0005024(transforming growth factor beta-activated receptor activity);GO:0005201(extracellular matrix structural constituent);GO:0005509(calcium ion binding);GO:0005515(protein binding);GO:0005576(extracellular region);GO:0005788(endoplasmic reticulum lumen);GO:0007178(transmembrane receptor protein serine/threonine kinase signa…	04350(TGF-beta signaling pathway);04350(TGF-beta signaling pathway)	K19559	NA	latent transforming growth factor beta binding protein 1 [Source:HGNC Symbol;Acc:HGNC:6714]	protein_coding	DOID:0050687(cell_type_cancer);DOID:4(disease);DOID:162(cancer);DOID:1790(malignant_mesothelioma);DOID:14566(disease_of_cellular_proliferation)	R_HSA_597592(Post_translational_protein_modification);R_HSA_1474244(Extracellular_matrix_organization);R_HSA_1566948(Elastic_fibre_formation);R_HSA_2129379(Molecules_associated_with_elastic_fibres);R_HSA_392499(Metabolism_of_proteins);R_HSA_381426(Regulation_of_Insulin_like_Growth_Factor_(IGF)_transport_and_uptake_by_Insulin_like_Growth_Factor_Binding_Proteins_(IGFBPs));R_HSA_8957275(Post_transla…	2.23953	2.32211	2.83016	7.74167	9.1934	6.29848	0.318152	-1.65221	1.62009e-22	4.22613e-20	down	yes
ENSG00000130635	COL5A1	228687;228696;228694;228691;228688;228693;228690;228695	ENST00000371817;ENST00000465877;ENST00000460264;ENST00000469093;ENST00000618395;ENST00000463925;ENST00000464187;ENST00000371820	GO:0001568(blood vessel development);GO:0003007(heart morphogenesis);GO:0005178(integrin binding);GO:0005201(extracellular matrix structural constituent);GO:0005515(protein binding);GO:0005576(extracellular region);GO:0005581(collagen trimer);GO:0005588(collagen type V trimer);GO:0005604(basement membrane);GO:0005615(extracellular space);GO:0005788(endoplasmic reticulum lumen);GO:0007155(cell adh…	04974(Protein digestion and absorption);04974(Protein digestion and absorption)	K19721	NA	collagen type V alpha 1 chain [Source:HGNC Symbol;Acc:HGNC:2209]	protein_coding;retained_intron;processed_transcript	DOID:17(musculoskeletal_system_disease);DOID:225(syndrome);DOID:4(disease);DOID:854(collagen_disease);DOID:0060085(organ_system_benign_neoplasm);DOID:0050622(reproductive_organ_benign_neoplasm);DOID:0060095(uterine_benign_neoplasm);DOID:14566(disease_of_cellular_proliferation);DOID:0060072(benign_neoplasm);DOID:127(leiomyoma);DOID:65(connective_tissue_disease);DOID:0060086(female_reproductive_org…	R_HSA_375165(NCAM_signaling_for_neurite_out_growth);R_HSA_1474290(Collagen_formation);R_HSA_1442490(Collagen_degradation);R_HSA_1474244(Extracellular_matrix_organization);R_HSA_1650814(Collagen_biosynthesis_and_modifying_enzymes);R_HSA_3000178(ECM_proteoglycans);R_HSA_6806834(Signaling_by_MET);R_HSA_1266738(Developmental_Biology);R_HSA_8948216(Collagen_chain_trimerization);R_HSA_162582(Signal_Tra…	2.87759	3.13162	3.14215	9.29439	9.45532	6.73841	0.359044	-1.47777	1.88728e-22	4.88666e-20	down	yes
ENSG00000103512	NOMO1	86361;86369;86368;86363;86366;86364	ENST00000287667;ENST00000566823;ENST00000565655;ENST00000610363;ENST00000566917;ENST00000566720	GO:0003674(molecular_function);GO:0005789(endoplasmic reticulum membrane);GO:0008150(biological_process);GO:0016020(membrane);GO:0016021(integral component of membrane);GO:0030246(carbohydrate binding);GO:0030246(carbohydrate binding)	NA	NA	NA	NODAL modulator 1 [Source:HGNC Symbol;Acc:HGNC:30060]	protein_coding;retained_intron;processed_transcript	NA	NA	8.64295	9.64742	12.3164	34.9232	34.1375	26.4334	0.32051	-1.64156	1.9256e-22	4.9492e-20	down	yes
ENSG00000172927	MYEOV	44277;44275;44280;44274;44276;44278;44273;44282;44272;44283;44284	ENST00000535653;ENST00000441339;ENST00000544781;ENST00000308946;ENST00000535407;ENST00000540760;ENST00000539691;ENST00000535660;ENST00000544008;ENST00000541137;ENST00000540356	GO:0005515(protein binding);GO:0005515(protein binding)	NA	NA	NA	myeloma overexpressed [Source:HGNC Symbol;Acc:HGNC:7563]	retained_intron;protein_coding;processed_transcript	NA	NA	5.32845	5.22711	5.67982	15.6233	15.2954	12.9608	0.37	-1.4344	2.06896e-22	5.27886e-20	down	yes
ENSG00000118257	NRP2	139648;139646;139645;139649;139652;139651;139674;139650;139658;139655;139676;139647;139675;139654;139657	ENST00000417189;ENST00000360409;ENST00000464003;ENST00000478013;ENST00000272849;ENST00000357785;ENST00000485684;ENST00000357118;ENST00000468256;ENST00000477199;ENST00000467850;ENST00000450507;ENST00000472299;ENST00000483917;ENST00000460987	GO:0001525(angiogenesis);GO:0001755(neural crest cell migration);GO:0001764(neuron migration);GO:0001938(positive regulation of endothelial cell proliferation);GO:0002116(semaphorin receptor complex);GO:0003148(outflow tract septum morphogenesis);GO:0005021(vascular endothelial growth factor-activated receptor activity);GO:0005515(protein binding);GO:0005576(extracellular region);GO:0005886(plasm…	NA	K06819	NA	neuropilin 2 [Source:HGNC Symbol;Acc:HGNC:8005]	protein_coding;processed_transcript;retained_intron	DOID:0080001(bone_disease);DOID:0060037(developmental_disorder_of_mental_health);DOID:1240(leukemia);DOID:2531(hematologic_cancer);DOID:17(musculoskeletal_system_disease);DOID:0050687(cell_type_cancer);DOID:0060040(pervasive_developmental_disorder);DOID:4(disease);DOID:8692(myeloid_leukemia);DOID:170(endocrine_gland_cancer);DOID:848(arthritis);DOID:3498(pancreatic_ductal_adenocarcinoma);DOID:162(…	R_HSA_194138(Signaling_by_VEGF);R_HSA_1266738(Developmental_Biology);R_HSA_447038(NrCAM_interactions);R_HSA_162582(Signal_Transduction);R_HSA_9675108(Nervous_system_development);R_HSA_422475(Axon_guidance);R_HSA_373760(L1CAM_interactions);R_HSA_194306(Neurophilin_interactions_with_VEGF_and_VEGFR);R_HSA_9006934(Signaling_by_Receptor_Tyrosine_Kinases)	6.46417	8.25691	10.3823	30.0526	31.3077	23.9434	0.294282	-1.76473	2.44764e-22	6.17123e-20	down	yes
ENSG00000128567	PODXL	210189;210188;210194;210191;210192;210193;210190	ENST00000378555;ENST00000446198;ENST00000482581;ENST00000322985;ENST00000490761;ENST00000487965;ENST00000484346	GO:0001726(ruffle);GO:0005515(protein binding);GO:0005615(extracellular space);GO:0005730(nucleolus);GO:0005737(cytoplasm);GO:0005886(plasma membrane);GO:0005887(integral component of plasma membrane);GO:0005902(microvillus);GO:0007155(cell adhesion);GO:0007162(negative regulation of cell adhesion);GO:0016020(membrane);GO:0016021(integral component of membrane);GO:0016324(apical plasma membrane);…	NA	NA	NA	podocalyxin like [Source:HGNC Symbol;Acc:HGNC:9171]	protein_coding;nonsense_mediated_decay;retained_intron	DOID:3996(urinary_system_cancer);DOID:4897(bile_duct_carcinoma);DOID:0050687(cell_type_cancer);DOID:4(disease);DOID:4606(bile_duct_cancer);DOID:9256(colorectal_cancer);DOID:2994(germ_cell_cancer);DOID:5672(large_intestine_cancer);DOID:2154(nephroblastoma);DOID:162(cancer);DOID:3119(gastrointestinal_system_cancer);DOID:14566(disease_of_cellular_proliferation);DOID:3308(embryonal_carcinoma);DOID:10…	NA	1.96324	3.29057	1.88984	11.2873	10.8828	8.7418	0.231097	-2.11343	2.45402e-22	6.17123e-20	down	yes
ENSG00000182871	COL18A1	151019;151026;151032;151024;151023;151027;151031	ENST00000651438;ENST00000342220;ENST00000473212;ENST00000359759;ENST00000355480;ENST00000459895;ENST00000423214	GO:0001525(angiogenesis);GO:0001886(endothelial cell morphogenesis);GO:0005201(extracellular matrix structural constituent);GO:0005515(protein binding);GO:0005576(extracellular region);GO:0005581(collagen trimer);GO:0005604(basement membrane);GO:0005615(extracellular space);GO:0005788(endoplasmic reticulum lumen);GO:0007155(cell adhesion);GO:0007601(visual perception);GO:0008284(positive regulati…	04974(Protein digestion and absorption);04974(Protein digestion and absorption)	K06823	NA	collagen type XVIII alpha 1 chain [Source:HGNC Symbol;Acc:HGNC:2195]	protein_coding;retained_intron;processed_transcript	DOID:684(hepatocellular_carcinoma);DOID:3996(urinary_system_cancer);DOID:1307(dementia);DOID:1240(leukemia);DOID:2531(hematologic_cancer);DOID:1324(lung_cancer);DOID:225(syndrome);DOID:850(lung_disease);DOID:3571(liver_cancer);DOID:1037(lymphoblastic_leukemia);DOID:0050117(disease_by_infectious_agent);DOID:4(disease);DOID:1579(respiratory_system_disease);DOID:1289(neurodegenerative_disease);DOID:…	R_HSA_1474290(Collagen_formation);R_HSA_1442490(Collagen_degradation);R_HSA_1474244(Extracellular_matrix_organization);R_HSA_1650814(Collagen_biosynthesis_and_modifying_enzymes);R_HSA_1592389(Activation_of_Matrix_Metalloproteinases);R_HSA_3000157(Laminin_interactions);R_HSA_8948216(Collagen_chain_trimerization);R_HSA_2022090(Assembly_of_collagen_fibrils_and_other_multimeric_structures);R_HSA_2160…	6.44815	5.84999	10.9842	36.355	34.3975	26.108	0.24037	-2.05667	2.52378e-22	6.30133e-20	down	yes
ENSG00000101955	SRPX	1317;1315;1316;1318;1319;1314	ENST00000378533;ENST00000538295;ENST00000544439;ENST00000479015;ENST00000461865;ENST00000432886	GO:0001845(phagolysosome assembly);GO:0005201(extracellular matrix structural constituent);GO:0005515(protein binding);GO:0005776(autophagosome);GO:0005783(endoplasmic reticulum);GO:0006914(autophagy);GO:0007155(cell adhesion);GO:0009986(cell surface);GO:0016020(membrane);GO:0034976(response to endoplasmic reticulum stress);GO:0060244(negative regulation of cell proliferation involved in contact …	NA	NA	NA	sushi repeat containing protein X-linked [Source:HGNC Symbol;Acc:HGNC:11309]	protein_coding;processed_transcript	DOID:10286(prostate_carcinoma);DOID:1324(lung_cancer);DOID:4(disease);DOID:3856(male_reproductive_organ_cancer);DOID:3905(lung_carcinoma);DOID:162(cancer);DOID:3908(non_small_cell_lung_carcinoma);DOID:14566(disease_of_cellular_proliferation);DOID:3910(lung_adenocarcinoma);DOID:0050686(organ_system_cancer);DOID:10283(prostate_cancer);DOID:193(reproductive_organ_cancer);DOID:0050615(respiratory_sys…	NA	3.20435	3.20416	2.49749	11.9256	10.5352	9.89102	0.275285	-1.861	2.57158e-22	6.37516e-20	down	yes
ENSG00000153234	NR4A2	136452;136458;136461;136454;136457;136456;136453;136455	ENST00000339562;ENST00000409108;ENST00000424077;ENST00000409572;ENST00000417972;ENST00000675870;ENST00000426264;ENST00000417764	GO:0000122(negative regulation of transcription by RNA polymerase II);GO:0000790(nuclear chromatin);GO:0000977(RNA polymerase II regulatory region sequence-specific DNA binding);GO:0000978(RNA polymerase II cis-regulatory region sequence-specific DNA binding);GO:0000981(DNA-binding transcription factor activity, RNA polymerase II-specific);GO:0001228(DNA-binding transcription activator activity, …	04925(Aldosterone synthesis and secretion);04928(Parathyroid hormone synthesis, secretion and action);04928(Parathyroid hormone synthesis, secretion and action)	K08558	NA	nuclear receptor subfamily 4 group A member 2 [Source:HGNC Symbol;Acc:HGNC:7981]	protein_coding;nonsense_mediated_decay	DOID:684(hepatocellular_carcinoma);DOID:12217(Lewy_body_dementia);DOID:936(brain_disease);DOID:3571(liver_cancer);DOID:4(disease);DOID:10579(leukodystrophy);DOID:5419(schizophrenia);DOID:1289(neurodegenerative_disease);DOID:1443(cerebral_degeneration);DOID:162(cancer);DOID:14330(Parkinson's_disease);DOID:3119(gastrointestinal_system_cancer);DOID:2468(psychotic_disorder);DOID:863(nervous_system_di…	R_HSA_212436(Generic_Transcription_Pathway);R_HSA_597592(Post_translational_protein_modification);R_HSA_74160(Gene_expression_(Transcription));R_HSA_383280(Nuclear_Receptor_transcription_pathway);R_HSA_73857(RNA_Polymerase_II_Transcription);R_HSA_2990846(SUMOylation);R_HSA_392499(Metabolism_of_proteins);R_HSA_3108232(SUMO_E3_ligases_SUMOylate_target_proteins);R_HSA_4090294(SUMOylation_of_intracel…	0.899988	0.753331	0.610321	3.52121	3.4525	2.82454	0.231025	-2.11388	3.35684e-22	8.26325e-20	down	yes
ENSG00000204580	DDR1	193235;193217;193242;193220;193241;193205;193246;193214;193237;193197;193240;193226;193215;193223;193245;193218;193233;193211;193206;193210;193229;193209;193231;193227;193224;193243;193203;193204;193200;193230;193198;193238;193232;193208;193201;193191	ENST00000513240;ENST00000428153;ENST00000514534;ENST00000452441;ENST00000417521;ENST00000396342;ENST00000484556;ENST00000376569;ENST00000508472;ENST00000418800;ENST00000485023;ENST00000421124;ENST00000376570;ENST00000504152;ENST00000514434;ENST00000376568;ENST00000446312;ENST00000515881;ENST00000504651;ENST00000506573;ENST00000503495;ENST00000515233;ENST00000503670;ENST00000512725;ENST00000508312…	GO:0000166(nucleotide binding);GO:0001558(regulation of cell growth);GO:0001952(regulation of cell-matrix adhesion);GO:0004672(protein kinase activity);GO:0004713(protein tyrosine kinase activity);GO:0004714(transmembrane receptor protein tyrosine kinase activity);GO:0005515(protein binding);GO:0005518(collagen binding);GO:0005524(ATP binding);GO:0005576(extracellular region);GO:0005615(extracell…	NA	NA	NA	discoidin domain receptor tyrosine kinase 1 [Source:HGNC Symbol;Acc:HGNC:2730]	protein_coding;retained_intron;processed_transcript;nonsense_mediated_decay	NA	R_HSA_1474244(Extracellular_matrix_organization);R_HSA_3000171(Non_integrin_membrane_ECM_interactions)	2.56224	2.57646	3.95649	11.5671	11.464	8.86208	0.285177	-1.81007	8.62462e-22	2.10821e-19	down	yes
ENSG00000197565	COL4A6	4718;4719;4725;4722;4727;4724;4726	ENST00000372216;ENST00000394872;ENST00000468338;ENST00000334504;ENST00000477085;ENST00000487645;ENST00000461897	GO:0005201(extracellular matrix structural constituent);GO:0005576(extracellular region);GO:0005581(collagen trimer);GO:0005587(collagen type IV trimer);GO:0005604(basement membrane);GO:0005615(extracellular space);GO:0005788(endoplasmic reticulum lumen);GO:0007155(cell adhesion);GO:0016020(membrane);GO:0030020(extracellular matrix structural constituent conferring tensile strength);GO:0030198(ex…	04151(PI3K-Akt signaling pathway);04510(Focal adhesion);04512(ECM-receptor interaction);04926(Relaxin signaling pathway);04933(AGE-RAGE signaling pathway in diabetic complications);04974(Protein digestion and absorption);05146(Amoebiasis);05165(Human papillomavirus infection);05200(Pathways in cancer);05222(Small cell lung cancer);05222(Small cell lung cancer)	NA	NA	collagen type IV alpha 6 chain [Source:HGNC Symbol;Acc:HGNC:2208]	protein_coding;retained_intron;processed_transcript	DOID:225(syndrome);DOID:0050687(cell_type_cancer);DOID:4(disease);DOID:1749(squamous_cell_carcinoma);DOID:170(endocrine_gland_cancer);DOID:162(cancer);DOID:14566(disease_of_cellular_proliferation);DOID:5138(leiomyomatosis);DOID:0060072(benign_neoplasm);DOID:127(leiomyoma);DOID:4074(pancreas_adenocarcinoma);DOID:0060084(cell_type_benign_neoplasm);DOID:4905(pancreatic_carcinoma);DOID:1793(pancreati…	R_HSA_2262752(Cellular_responses_to_stress);R_HSA_1474290(Collagen_formation);R_HSA_1442490(Collagen_degradation);R_HSA_1474244(Extracellular_matrix_organization);R_HSA_8953897(Cellular_responses_to_external_stimuli);R_HSA_1650814(Collagen_biosynthesis_and_modifying_enzymes);R_HSA_3371556(Cellular_response_to_heat_stress);R_HSA_3371511(HSF1_activation);R_HSA_3371453(Regulation_of_HSF1_mediated_he…	1.72333	1.67748	1.35119	5.30931	5.30744	3.94343	0.32637	-1.61542	9.7018e-22	2.35505e-19	down	yes
ENSG00000125740	FOSB	122117;122113;122115;122116;122112;122119;122114;122111	ENST00000586615;ENST00000353609;ENST00000592811;ENST00000586113;ENST00000590335;ENST00000587358;ENST00000592436;ENST00000591858	GO:0000122(negative regulation of transcription by RNA polymerase II);GO:0000790(nuclear chromatin);GO:0000978(RNA polymerase II cis-regulatory region sequence-specific DNA binding);GO:0000981(DNA-binding transcription factor activity, RNA polymerase II-specific);GO:0001228(DNA-binding transcription activator activity, RNA polymerase II-specific);GO:0003677(DNA binding);GO:0003690(double-stranded…	04380(Osteoclast differentiation);04657(IL-17 signaling pathway);05030(Cocaine addiction);05031(Amphetamine addiction);05034(Alcoholism);05034(Alcoholism)	NA	NA	FosB proto-oncogene, AP-1 transcription factor subunit [Source:HGNC Symbol;Acc:HGNC:3797]	protein_coding;retained_intron	DOID:684(hepatocellular_carcinoma);DOID:3571(liver_cancer);DOID:4(disease);DOID:162(cancer);DOID:3119(gastrointestinal_system_cancer);DOID:14566(disease_of_cellular_proliferation);DOID:686(liver_carcinoma);DOID:0050686(organ_system_cancer)	R_HSA_166520(Signaling_by_NTRKs);R_HSA_9006931(Signaling_by_Nuclear_Receptors);R_HSA_9031628(NGF_stimulated_transcription);R_HSA_198725(Nuclear_Events_(kinase_and_transcription_factor_activation));R_HSA_162582(Signal_Transduction);R_HSA_9018519(Estrogen_dependent_gene_expression);R_HSA_187037(Signaling_by_NTRK1_(TRKA));R_HSA_8939211(ESR_mediated_signaling);R_HSA_9006934(Signaling_by_Receptor_Tyro…	0.0287308	0.127295	0.0611594	1.3205	1.14667	0.794329	0.0665906	-3.90854	1.1742e-21	2.83063e-19	down	yes
ENSG00000108679	LGALS3BP	106794;106799;106810;106811;106797;106808;106807;106806;106801;106793;106803;106798;106809;106804	ENST00000262776;ENST00000588198;ENST00000591274;ENST00000586300;ENST00000587251;ENST00000588990;ENST00000588205;ENST00000587310;ENST00000588587;ENST00000591778;ENST00000585407;ENST00000588508;ENST00000588899;ENST00000589775	GO:0002576(platelet degranulation);GO:0005044(scavenger receptor activity);GO:0005515(protein binding);GO:0005576(extracellular region);GO:0005615(extracellular space);GO:0006897(endocytosis);GO:0006968(cellular defense response);GO:0007155(cell adhesion);GO:0007165(signal transduction);GO:0016020(membrane);GO:0031089(platelet dense granule lumen);GO:0062023(collagen-containing extracellular matr…	NA	K17300	NA	galectin 3 binding protein [Source:HGNC Symbol;Acc:HGNC:6564]	protein_coding;nonsense_mediated_decay;retained_intron	DOID:0050687(cell_type_cancer);DOID:4(disease);DOID:10534(stomach_cancer);DOID:1749(squamous_cell_carcinoma);DOID:1192(peripheral_nervous_system_neoplasm);DOID:9256(colorectal_cancer);DOID:5672(large_intestine_cancer);DOID:2621(autonomic_nervous_system_neoplasm);DOID:162(cancer);DOID:3119(gastrointestinal_system_cancer);DOID:769(neuroblastoma);DOID:14566(disease_of_cellular_proliferation);DOID:86…	R_HSA_76005(Response_to_elevated_platelet_cytosolic_Ca2+);R_HSA_76002(Platelet_activation,_signaling_and_aggregation);R_HSA_114608(Platelet_degranulation);R_HSA_109582(Hemostasis)	10.8923	14.9964	17.0796	56.3864	49.2272	41.949	0.291188	-1.77998	1.22792e-21	2.93986e-19	down	yes
ENSG00000182158	CREB3L2	210490;210493;210498;210496;210494	ENST00000330387;ENST00000456390;ENST00000468127;ENST00000420629;ENST00000452463	GO:0000785(chromatin);GO:0000790(nuclear chromatin);GO:0000976(transcription regulatory region sequence-specific DNA binding);GO:0000978(RNA polymerase II cis-regulatory region sequence-specific DNA binding);GO:0000981(DNA-binding transcription factor activity, RNA polymerase II-specific);GO:0001228(DNA-binding transcription activator activity, RNA polymerase II-specific);GO:0002062(chondrocyte d…	04022(cGMP-PKG signaling pathway);04024(cAMP signaling pathway);04151(PI3K-Akt signaling pathway);04152(AMPK signaling pathway);04211(Longevity regulating pathway);04261(Adrenergic signaling in cardiomyocytes);04668(TNF signaling pathway);04714(Thermogenesis);04725(Cholinergic synapse);04728(Dopaminergic synapse);04911(Insulin secretion);04915(Estrogen signaling pathway);04916(Melanogenesis);0491…	K09048	NA	cAMP responsive element binding protein 3 like 2 [Source:HGNC Symbol;Acc:HGNC:23720]	protein_coding;processed_transcript	DOID:3382(liposarcoma);DOID:0050687(cell_type_cancer);DOID:1115(sarcoma);DOID:4(disease);DOID:3355(fibrosarcoma);DOID:1781(thyroid_cancer);DOID:2994(germ_cell_cancer);DOID:170(endocrine_gland_cancer);DOID:162(cancer);DOID:4766(embryoma);DOID:14566(disease_of_cellular_proliferation);DOID:201(connective_tissue_cancer);DOID:0060100(musculoskeletal_system_cancer);DOID:3963(thyroid_carcinoma);DOID:393…	R_HSA_8874211(CREB3_factors_activate_genes);R_HSA_392499(Metabolism_of_proteins);R_HSA_381119(Unfolded_Protein_Response_(UPR))	4.19154	4.86243	4.98078	13.3607	14.8041	10.7335	0.360807	-1.4707	1.26036e-21	2.99701e-19	down	yes
ENSG00000119681	LTBP2	71682;71683;71686;71684;71685	ENST00000261978;ENST00000553939;ENST00000556206;ENST00000554861;ENST00000556690	GO:0005201(extracellular matrix structural constituent);GO:0005509(calcium ion binding);GO:0005515(protein binding);GO:0005576(extracellular region);GO:0005615(extracellular space);GO:0006605(protein targeting);GO:0007179(transforming growth factor beta receptor signaling pathway);GO:0008201(heparin binding);GO:0009306(protein secretion);GO:0019838(growth factor binding);GO:0031012(extracellular …	NA	K08023	NA	latent transforming growth factor beta binding protein 2 [Source:HGNC Symbol;Acc:HGNC:6715]	protein_coding;nonsense_mediated_decay;retained_intron	DOID:5679(retinal_disease);DOID:0050687(cell_type_cancer);DOID:4(disease);DOID:8466(retinal_degeneration);DOID:162(cancer);DOID:1909(melanoma);DOID:863(nervous_system_disease);DOID:1492(eye_and_adnexa_disease);DOID:14566(disease_of_cellular_proliferation);DOID:0050155(sensory_system_disease);DOID:1686(glaucoma);DOID:5614(eye_disease);DOID:7(disease_of_anatomical_entity)	R_HSA_1474244(Extracellular_matrix_organization);R_HSA_1566948(Elastic_fibre_formation);R_HSA_2129379(Molecules_associated_with_elastic_fibres)	1.96795	2.02296	1.85107	6.26953	6.65735	4.37258	0.337698	-1.56619	1.29541e-21	3.05954e-19	down	yes
ENSG00000069188	SDK2	105397;105398;105401;105400	ENST00000392650;ENST00000424778;ENST00000585283;ENST00000479356	GO:0005515(protein binding);GO:0005886(plasma membrane);GO:0007155(cell adhesion);GO:0007156(homophilic cell adhesion via plasma membrane adhesion molecules);GO:0007416(synapse assembly);GO:0010842(retina layer formation);GO:0016020(membrane);GO:0016021(integral component of membrane);GO:0030054(cell junction);GO:0045202(synapse);GO:0045216(cell-cell junction organization);GO:0060219(camera-type …	NA	K16353	NA	sidekick cell adhesion molecule 2 [Source:HGNC Symbol;Acc:HGNC:19308]	protein_coding;processed_transcript;retained_intron	NA	R_HSA_446728(Cell_junction_organization);R_HSA_421270(Cell_cell_junction_organization);R_HSA_1500931(Cell_Cell_communication);R_HSA_373756(SDK_interactions)	1.29059	1.33547	1.15696	4.11746	4.44629	2.93354	0.329036	-1.60368	1.62269e-21	3.80678e-19	down	yes
ENSG00000148400	NOTCH1	228929;228932;228934;228930	ENST00000651671;ENST00000646957;ENST00000491649;ENST00000645828	GO:0000122(negative regulation of transcription by RNA polymerase II);GO:0000139(Golgi membrane);GO:0001525(angiogenesis);GO:0001669(acrosomal vesicle);GO:0001701(in utero embryonic development);GO:0001708(cell fate specification);GO:0001837(epithelial to mesenchymal transition);GO:0001889(liver development);GO:0001947(heart looping);GO:0002040(sprouting angiogenesis);GO:0002052(positive regulati…	01522(Endocrine resistance);04330(Notch signaling pathway);04658(Th1 and Th2 cell differentiation);04919(Thyroid hormone signaling pathway);05020(Prion diseases);05165(Human papillomavirus infection);05200(Pathways in cancer);05206(MicroRNAs in cancer);05224(Breast cancer);05224(Breast cancer)	K02599	NA	notch receptor 1 [Source:HGNC Symbol;Acc:HGNC:7881]	protein_coding;retained_intron	DOID:0080001(bone_disease);DOID:684(hepatocellular_carcinoma);DOID:3996(urinary_system_cancer);DOID:1307(dementia);DOID:2394(ovarian_cancer);DOID:1240(leukemia);DOID:0050624(gastrointestinal_system_benign_neoplasm);DOID:1612(breast_cancer);DOID:3275(thymoma);DOID:2531(hematologic_cancer);DOID:0080015(physical_disorder);DOID:1324(lung_cancer);DOID:3277(thymus_cancer);DOID:17(musculoskeletal_system…	R_HSA_212436(Generic_Transcription_Pathway);R_HSA_2644607(Loss_of_Function_of_FBXW7_in_Cancer_and_NOTCH1_Signaling);R_HSA_2894858(Signaling_by_NOTCH1_HD+PEST_Domain_Mutants_in_Cancer);R_HSA_8986944(Transcriptional_Regulation_by_MECP2);R_HSA_186712(Regulation_of_beta_cell_development);R_HSA_3781865(Diseases_of_glycosylation);R_HSA_157118(Signaling_by_NOTCH);R_HSA_9013508(NOTCH3_Intracellular_Domai…	0.977243	1.13396	1.02992	3.87365	3.8638	2.5419	0.305576	-1.7104	2.07805e-21	4.81775e-19	down	yes
ENSG00000185022	MAFF	154585;154583;154582;154589	ENST00000338483;ENST00000538320;ENST00000624676;ENST00000407965	GO:0000790(nuclear chromatin);GO:0000978(RNA polymerase II cis-regulatory region sequence-specific DNA binding);GO:0000981(DNA-binding transcription factor activity, RNA polymerase II-specific);GO:0001228(DNA-binding transcription activator activity, RNA polymerase II-specific);GO:0001701(in utero embryonic development);GO:0003677(DNA binding);GO:0003700(DNA-binding transcription factor activity)…	NA	K09037	NA	MAF bZIP transcription factor F [Source:HGNC Symbol;Acc:HGNC:6780]	protein_coding;retained_intron	NA	R_HSA_983231(Factors_involved_in_megakaryocyte_development_and_platelet_production);R_HSA_109582(Hemostasis)	1.22646	1.91094	0.811035	8.08425	6.84848	6.29212	0.186029	-2.4264	2.08527e-21	4.81775e-19	down	yes
ENSG00000059728	MXD1	130836;130833;130837;130835;130838	ENST00000409442;ENST00000435990;ENST00000264444;ENST00000540449;ENST00000410000	GO:0000122(negative regulation of transcription by RNA polymerase II);GO:0000790(nuclear chromatin);GO:0000978(RNA polymerase II cis-regulatory region sequence-specific DNA binding);GO:0000981(DNA-binding transcription factor activity, RNA polymerase II-specific);GO:0001227(DNA-binding transcription repressor activity, RNA polymerase II-specific);GO:0003677(DNA binding);GO:0005515(protein binding…	NA	K09114	NA	MAX dimerization protein 1 [Source:HGNC Symbol;Acc:HGNC:6761]	nonsense_mediated_decay;protein_coding;retained_intron	DOID:1240(leukemia);DOID:2531(hematologic_cancer);DOID:12603(acute_leukemia);DOID:0050687(cell_type_cancer);DOID:4(disease);DOID:162(cancer);DOID:1909(melanoma);DOID:14566(disease_of_cellular_proliferation);DOID:0060083(immune_system_cancer);DOID:0050686(organ_system_cancer)	NA	0.358598	0.528296	0.405546	2.40157	2.1591	1.59855	0.209838	-2.25265	2.09497e-21	4.81775e-19	down	yes
ENSG00000104805	NUCB1	123012;123017;123018;123021;123024;123016;123023;123014;123022	ENST00000405315;ENST00000411700;ENST00000451312;ENST00000465524;ENST00000492367;ENST00000443560;ENST00000469291;ENST00000452087;ENST00000460125	GO:0001965(G-protein alpha-subunit binding);GO:0003677(DNA binding);GO:0005085(guanyl-nucleotide exchange factor activity);GO:0005509(calcium ion binding);GO:0005515(protein binding);GO:0005576(extracellular region);GO:0005615(extracellular space);GO:0005634(nucleus);GO:0005737(cytoplasm);GO:0005769(early endosome);GO:0005788(endoplasmic reticulum lumen);GO:0005791(rough endoplasmic reticulum);GO…	NA	K20371	NA	nucleobindin 1 [Source:HGNC Symbol;Acc:HGNC:8043]	protein_coding;retained_intron;nonsense_mediated_decay	NA	R_HSA_597592(Post_translational_protein_modification);R_HSA_392499(Metabolism_of_proteins);R_HSA_381426(Regulation_of_Insulin_like_Growth_Factor_(IGF)_transport_and_uptake_by_Insulin_like_Growth_Factor_Binding_Proteins_(IGFBPs));R_HSA_8957275(Post_translational_protein_phosphorylation)	14.7538	19.6501	18.0597	58.7477	53.9361	43.4131	0.336096	-1.57305	2.11404e-21	4.82982e-19	down	yes
ENSG00000185164	NOMO2	86673;86672;86665;86667;86674;86679;86669;86666;86678;86676;86675	ENST00000622306;ENST00000621364;ENST00000330537;ENST00000381474;ENST00000543392;ENST00000562312;ENST00000569526;ENST00000620440;ENST00000564355;ENST00000569051;ENST00000567831	GO:0005515(protein binding);GO:0005783(endoplasmic reticulum);GO:0005789(endoplasmic reticulum membrane);GO:0016020(membrane);GO:0016021(integral component of membrane);GO:0030246(carbohydrate binding);GO:0032991(protein-containing complex);GO:0032991(protein-containing complex)	NA	NA	NA	NODAL modulator 2 [Source:HGNC Symbol;Acc:HGNC:22652]	protein_coding;nonsense_mediated_decay;retained_intron	NA	NA	7.74849	8.62919	11.1882	30.1283	29.3636	23.9683	0.330287	-1.59821	2.54889e-21	5.78549e-19	down	yes
ENSG00000099812	MISP	112646;112647	ENST00000215582;ENST00000614180	GO:0000132(establishment of mitotic spindle orientation);GO:0003779(actin binding);GO:0005515(protein binding);GO:0005737(cytoplasm);GO:0005856(cytoskeleton);GO:0005884(actin filament);GO:0005886(plasma membrane);GO:0005925(focal adhesion);GO:0005938(cell cortex);GO:0007049(cell cycle);GO:0016477(cell migration);GO:0030054(cell junction);GO:0030864(cortical actin cytoskeleton);GO:0031616(spindle …	NA	NA	NA	mitotic spindle positioning [Source:HGNC Symbol;Acc:HGNC:27000]	protein_coding;processed_transcript	NA	NA	8.90869	11.8092	14.9356	47.599	44.4069	34.7492	0.281278	-1.82993	3.29199e-21	7.42397e-19	down	yes
ENSG00000072571	HMMR	189156;189155;189160;189159;189153;189158;189154	ENST00000393915;ENST00000353866;ENST00000517936;ENST00000358715;ENST00000520345;ENST00000521108;ENST00000522094	GO:0005515(protein binding);GO:0005540(hyaluronic acid binding);GO:0005737(cytoplasm);GO:0005813(centrosome);GO:0005829(cytosol);GO:0005886(plasma membrane);GO:0009986(cell surface);GO:0010389(regulation of G2/M transition of mitotic cell cycle);GO:0015630(microtubule cytoskeleton);GO:0016020(membrane);GO:0030214(hyaluronan catabolic process);GO:0030214(hyaluronan catabolic process)	04512(ECM-receptor interaction);04512(ECM-receptor interaction)	K06267	NA	hyaluronan mediated motility receptor [Source:HGNC Symbol;Acc:HGNC:5012]	protein_coding;retained_intron	DOID:1240(leukemia);DOID:2531(hematologic_cancer);DOID:630(genetic_disease);DOID:0050687(cell_type_cancer);DOID:4(disease);DOID:0050177(monogenic_disease);DOID:1749(squamous_cell_carcinoma);DOID:0050736(autosomal_dominant_disease);DOID:5683(hereditary_breast_ovarian_cancer);DOID:0050739(autosomal_genetic_disease);DOID:162(cancer);DOID:14566(disease_of_cellular_proliferation);DOID:1036(chronic_leu…	R_HSA_8854518(AURKA_Activation_by_TPX2);R_HSA_2160916(Hyaluronan_uptake_and_degradation);R_HSA_69275(G2/M_Transition);R_HSA_71387(Metabolism_of_carbohydrates);R_HSA_1630316(Glycosaminoglycan_metabolism);R_HSA_1640170(Cell_Cycle);R_HSA_453274(Mitotic_G2_G2/M_phases);R_HSA_69278(Cell_Cycle,_Mitotic);R_HSA_2142845(Hyaluronan_metabolism);R_HSA_1430728(Metabolism)	12.7294	14.9193	15.1567	4.3772	5.21289	4.46516	3.0455	1.60668	3.6474e-21	8.17274e-19	up	yes
ENSG00000108797	CNTNAP1	101162;101161;101165;101164	ENST00000591662;ENST00000264638;ENST00000585534;ENST00000586801	GO:0002175(protein localization to paranode region of axon);GO:0005515(protein binding);GO:0005887(integral component of plasma membrane);GO:0005918(septate junction);GO:0007010(cytoskeleton organization);GO:0007155(cell adhesion);GO:0007165(signal transduction);GO:0016020(membrane);GO:0016021(integral component of membrane);GO:0017124(SH3 domain binding);GO:0019227(neuronal action potential prop…	04514(Cell adhesion molecules (CAMs));04514(Cell adhesion molecules (CAMs))	K07379	NA	contactin associated protein 1 [Source:HGNC Symbol;Acc:HGNC:8011]	nonsense_mediated_decay;protein_coding;retained_intron	NA	R_HSA_1266738(Developmental_Biology);R_HSA_9675108(Nervous_system_development);R_HSA_447043(Neurofascin_interactions);R_HSA_422475(Axon_guidance);R_HSA_373760(L1CAM_interactions)	1.33795	1.53029	1.67207	6.06188	5.20082	3.96537	0.298154	-1.74587	4.34395e-21	9.67151e-19	down	yes
ENSG00000171931	FBXW10	97780;97784;97783;97782;97781	ENST00000308799;ENST00000573605;ENST00000301938;ENST00000574478;ENST00000395665	GO:0000209(protein polyubiquitination);GO:0005515(protein binding);GO:0005829(cytosol);GO:0043687(post-translational protein modification);GO:0043687(post-translational protein modification)	NA	K10266	NA	F-box and WD repeat domain containing 10 [Source:HGNC Symbol;Acc:HGNC:1211]	protein_coding;processed_transcript;nonsense_mediated_decay	NA	R_HSA_983169(Class_I_MHC_mediated_antigen_processing_&_presentation);R_HSA_597592(Post_translational_protein_modification);R_HSA_8951664(Neddylation);R_HSA_168256(Immune_System);R_HSA_983168(Antigen_processing:_Ubiquitination_&_Proteasome_degradation);R_HSA_390471(Association_of_TriC/CCT_with_target_proteins_during_biosynthesis);R_HSA_390466(Chaperonin_mediated_protein_folding);R_HSA_391251(Prote…	1.67862	1.29865	3.67545	0.226557	0.197092	0.219159	10.3495	3.37148	5.76277e-21	1.27492e-18	up	yes
ENSG00000184897	H1-10	165116	ENST00000333762	GO:0000786(nucleosome);GO:0003677(DNA binding);GO:0003690(double-stranded DNA binding);GO:0003723(RNA binding);GO:0005634(nucleus);GO:0005654(nucleoplasm);GO:0005694(chromosome);GO:0005730(nucleolus);GO:0006334(nucleosome assembly);GO:0006355(regulation of transcription, DNA-templated);GO:0016584(nucleosome positioning);GO:0030261(chromosome condensation);GO:0031492(nucleosomal DNA binding);GO:00…	NA	K11275	NA	H1.10 linker histone [Source:HGNC Symbol;Acc:HGNC:4722]	protein_coding	NA	NA	41.0659	41.1778	33.5926	108.252	105.826	92.4944	0.377843	-1.40414	5.87273e-21	1.29108e-18	down	yes
ENSG00000102271	KLHL4	3988;3987	ENST00000373119;ENST00000652270	GO:0003674(molecular_function);GO:0003779(actin binding);GO:0005515(protein binding);GO:0005737(cytoplasm);GO:0005856(cytoskeleton);GO:0008150(biological_process);GO:0015630(microtubule cytoskeleton);GO:0034451(centriolar satellite);GO:0034451(centriolar satellite)	NA	K10442	NA	kelch like family member 4 [Source:HGNC Symbol;Acc:HGNC:6355]	protein_coding;nonsense_mediated_decay	NA	NA	1.40488	1.24502	1.63987	0.331584	0.214274	0.171118	5.98314	2.5809	6.84782e-21	1.48883e-18	up	yes
ENSG00000172270	BSG	112588;112591;112602;112595;112596;112593;112587;112601;112600;112589;112592;112597;112599;112590	ENST00000346916;ENST00000353555;ENST00000571735;ENST00000333511;ENST00000613627;ENST00000590218;ENST00000545507;ENST00000576984;ENST00000574970;ENST00000576925;ENST00000572899;ENST00000618006;ENST00000573784;ENST00000573216	GO:0000139(Golgi membrane);GO:0001917(photoreceptor inner segment);GO:0002080(acrosomal membrane);GO:0005515(protein binding);GO:0005537(mannose binding);GO:0005739(mitochondrion);GO:0005886(plasma membrane);GO:0005887(integral component of plasma membrane);GO:0005925(focal adhesion);GO:0006090(pyruvate metabolic process);GO:0007155(cell adhesion);GO:0007156(homophilic cell adhesion via plasma me…	NA	NA	NA	basigin (Ok blood group) [Source:HGNC Symbol;Acc:HGNC:1116]	protein_coding;retained_intron;processed_transcript	DOID:0080001(bone_disease);DOID:684(hepatocellular_carcinoma);DOID:3996(urinary_system_cancer);DOID:1307(dementia);DOID:2394(ovarian_cancer);DOID:1240(leukemia);DOID:6000(congestive_heart_failure);DOID:2531(hematologic_cancer);DOID:17(musculoskeletal_system_disease);DOID:0050687(cell_type_cancer);DOID:850(lung_disease);DOID:3571(liver_cancer);DOID:4(disease);DOID:1579(respiratory_system_disease);…	R_HSA_210991(Basigin_interactions);R_HSA_70268(Pyruvate_metabolism);R_HSA_1474244(Extracellular_matrix_organization);R_HSA_382551(Transport_of_small_molecules);R_HSA_425407(SLC_mediated_transmembrane_transport);R_HSA_1428517(The_citric_acid_(TCA)_cycle_and_respiratory_electron_transport);R_HSA_202733(Cell_surface_interactions_at_the_vascular_wall);R_HSA_5619070(Defective_SLC16A1_causes_symptomati…	45.1849	50.7179	56.1485	147.62	136.568	115.519	0.380407	-1.39438	6.85746e-21	1.48883e-18	down	yes
ENSG00000134013	LOXL2	213984;213987;213999;213986;213990;213985;214003;213996;213991;213997;213992;213989;213998	ENST00000389131;ENST00000520349;ENST00000519243;ENST00000523833;ENST00000519809;ENST00000520617;ENST00000524075;ENST00000520871;ENST00000520925;ENST00000518083;ENST00000518472;ENST00000522446;ENST00000524168	GO:0000122(negative regulation of transcription by RNA polymerase II);GO:0000785(chromatin);GO:0001666(response to hypoxia);GO:0001837(epithelial to mesenchymal transition);GO:0001935(endothelial cell proliferation);GO:0002040(sprouting angiogenesis);GO:0004720(protein-lysine 6-oxidase activity);GO:0005044(scavenger receptor activity);GO:0005507(copper ion binding);GO:0005509(calcium ion binding)…	NA	K00280	EC:1.4.3.-	lysyl oxidase like 2 [Source:HGNC Symbol;Acc:HGNC:6666]	protein_coding;processed_transcript;retained_intron	DOID:893(Wilson_disease);DOID:1612(breast_cancer);DOID:0050687(cell_type_cancer);DOID:4(disease);DOID:1749(squamous_cell_carcinoma);DOID:409(liver_disease);DOID:896(metal_metabolism_disorder);DOID:77(gastrointestinal_system_disease);DOID:0014667(disease_of_metabolism);DOID:3459(breast_carcinoma);DOID:162(cancer);DOID:14566(disease_of_cellular_proliferation);DOID:5093(thoracic_cancer);DOID:3118(he…	R_HSA_1474290(Collagen_formation);R_HSA_1474244(Extracellular_matrix_organization);R_HSA_1566948(Elastic_fibre_formation);R_HSA_2022090(Assembly_of_collagen_fibrils_and_other_multimeric_structures);R_HSA_2243919(Crosslinking_of_collagen_fibrils)	10.9	13.7013	12.262	38.9905	34.7567	29.2632	0.35786	-1.48253	6.97721e-21	1.50548e-18	down	yes
ENSG00000080845	DLGAP4	145585;145581;145576;145586;145572;145589;145584;145582;145578;145583;145577;145579;145580;145573	ENST00000478910;ENST00000340491;ENST00000475894;ENST00000497862;ENST00000373913;ENST00000477195;ENST00000479951;ENST00000479220;ENST00000495241;ENST00000489701;ENST00000482872;ENST00000491207;ENST00000482037;ENST00000339266	GO:0005515(protein binding);GO:0005886(plasma membrane);GO:0016020(membrane);GO:0023052(signaling);GO:0045202(synapse);GO:0045202(synapse)	NA	NA	NA	DLG associated protein 4 [Source:HGNC Symbol;Acc:HGNC:24476]	retained_intron;protein_coding;processed_transcript	NA	R_HSA_6794361(Neurexins_and_neuroligins);R_HSA_6794362(Protein_protein_interactions_at_synapses);R_HSA_112316(Neuronal_System)	2.18237	3.28742	2.33526	9.75917	9.52886	7.52473	0.291095	-1.78044	7.31843e-21	1.56942e-18	down	yes
ENSG00000172893	DHCR7	44441;44446;44440;44445;44442;44443;44450;44447;44449;44448;44444	ENST00000407721;ENST00000526780;ENST00000355527;ENST00000534701;ENST00000533800;ENST00000525137;ENST00000527452;ENST00000525346;ENST00000529990;ENST00000531364;ENST00000527316	GO:0001568(blood vessel development);GO:0005515(protein binding);GO:0005640(nuclear outer membrane);GO:0005783(endoplasmic reticulum);GO:0005789(endoplasmic reticulum membrane);GO:0005829(cytosol);GO:0006629(lipid metabolic process);GO:0006694(steroid biosynthetic process);GO:0006695(cholesterol biosynthetic process);GO:0008202(steroid metabolic process);GO:0008203(cholesterol metabolic process);…	00100(Steroid biosynthesis);00100(Steroid biosynthesis)	K00213	EC:1.3.1.21	7-dehydrocholesterol reductase [Source:HGNC Symbol;Acc:HGNC:2860]	protein_coding;retained_intron	DOID:225(syndrome);DOID:4(disease);DOID:3146(lipid_metabolism_disorder);DOID:0014667(disease_of_metabolism);DOID:14692(Smith_Lemli_Opitz_syndrome);DOID:655(inherited_metabolic_disorder)	R_HSA_8957322(Metabolism_of_steroids);R_HSA_6807047(Cholesterol_biosynthesis_via_desmosterol);R_HSA_1655829(Regulation_of_cholesterol_biosynthesis_by_SREBP_(SREBF));R_HSA_191273(Cholesterol_biosynthesis);R_HSA_6807062(Cholesterol_biosynthesis_via_lathosterol);R_HSA_2426168(Activation_of_gene_expression_by_SREBF_(SREBP));R_HSA_556833(Metabolism_of_lipids);R_HSA_1430728(Metabolism)	7.37645	7.54704	10.0632	27.4236	26.9902	20.3942	0.334011	-1.58203	7.38438e-21	1.57391e-18	down	yes
ENSG00000082781	ITGB5	164588;164597;164600;164592;164599;164602;164589;164591;164598;164601;164604;164596	ENST00000296181;ENST00000496703;ENST00000608657;ENST00000488466;ENST00000465464;ENST00000608107;ENST00000460797;ENST00000481591;ENST00000476988;ENST00000483168;ENST00000608945;ENST00000474838	GO:0001618(virus receptor activity);GO:0002479(antigen processing and presentation of exogenous peptide antigen via MHC class I, TAP-dependent);GO:0005178(integrin binding);GO:0005515(protein binding);GO:0005886(plasma membrane);GO:0005925(focal adhesion);GO:0006936(muscle contraction);GO:0007155(cell adhesion);GO:0007160(cell-matrix adhesion);GO:0007179(transforming growth factor beta receptor s…	04145(Phagosome);04151(PI3K-Akt signaling pathway);04510(Focal adhesion);04512(ECM-receptor interaction);04810(Regulation of actin cytoskeleton);05165(Human papillomavirus infection);05205(Proteoglycans in cancer);05410(Hypertrophic cardiomyopathy (HCM));05412(Arrhythmogenic right ventricular cardiomyopathy (ARVC));05414(Dilated cardiomyopathy (DCM));05414(Dilated cardiomyopathy (DCM))	K06588	NA	integrin subunit beta 5 [Source:HGNC Symbol;Acc:HGNC:6160]	protein_coding;nonsense_mediated_decay;retained_intron;processed_transcript	DOID:17(musculoskeletal_system_disease);DOID:4(disease);DOID:418(systemic_scleroderma);DOID:0050828(artery_disease);DOID:2349(arteriosclerosis);DOID:417(hypersensitivity_reaction_type_II_disease);DOID:854(collagen_disease);DOID:162(cancer);DOID:1936(atherosclerosis);DOID:14566(disease_of_cellular_proliferation);DOID:8472(localized_scleroderma);DOID:1287(cardiovascular_system_disease);DOID:0060056…	R_HSA_983169(Class_I_MHC_mediated_antigen_processing_&_presentation);R_HSA_1474244(Extracellular_matrix_organization);R_HSA_397014(Muscle_contraction);R_HSA_1236973(Cross_presentation_of_particulate_exogenous_antigens_(phagosomes));R_HSA_168256(Immune_System);R_HSA_3000178(ECM_proteoglycans);R_HSA_1566948(Elastic_fibre_formation);R_HSA_1236975(Antigen_processing_Cross_presentation);R_HSA_2129379(…	38.4918	38.9427	37.0385	99.3213	98.2267	76.0033	0.41847	-1.2568	7.44333e-21	1.57686e-18	down	yes
ENSG00000079432	CIC	121384;121383;121387;121389;121386;121388;121391;121390;121385	ENST00000571942;ENST00000572681;ENST00000575354;ENST00000576505;ENST00000160740;ENST00000573349;ENST00000571033;ENST00000575287;ENST00000575839	GO:0000122(negative regulation of transcription by RNA polymerase II);GO:0000790(nuclear chromatin);GO:0000981(DNA-binding transcription factor activity, RNA polymerase II-specific);GO:0003677(DNA binding);GO:0003682(chromatin binding);GO:0005515(protein binding);GO:0005634(nucleus);GO:0005654(nucleoplasm);GO:0007420(brain development);GO:0007612(learning);GO:0007613(memory);GO:0032991(protein-co…	NA	K20225	NA	capicua transcriptional repressor [Source:HGNC Symbol;Acc:HGNC:14214]	protein_coding;retained_intron;nonsense_mediated_decay;processed_transcript	DOID:0050687(cell_type_cancer);DOID:4(disease);DOID:2994(germ_cell_cancer);DOID:162(cancer);DOID:3095(germ_cell_and_embryonal_cancer);DOID:14566(disease_of_cellular_proliferation);DOID:171(neuroectodermal_tumor)	NA	2.29429	3.00673	4.32035	14.7128	13.8858	9.89912	0.249921	-2.00046	9.04757e-21	1.90517e-18	down	yes
ENSG00000008710	PKD1	84527;84536;84510;84516;84504;84514;84513;84537;84530;84546;84528;84521;84526;84531;84503;84525;84508;84507;84515;84505;84533;84519;84540;84532;84539;84535;84523;84509;84538;84524;84518	ENST00000471603;ENST00000564865;ENST00000485120;ENST00000568796;ENST00000423118;ENST00000567355;ENST00000562425;ENST00000564890;ENST00000469851;ENST00000469241;ENST00000480227;ENST00000486339;ENST00000566784;ENST00000483814;ENST00000262304;ENST00000496574;ENST00000561668;ENST00000564313;ENST00000472659;ENST00000472577;ENST00000475889;ENST00000562297;ENST00000569983;ENST00000474088;ENST00000568591…	GO:0000139(Golgi membrane);GO:0001502(cartilage condensation);GO:0001568(blood vessel development);GO:0001701(in utero embryonic development);GO:0001822(kidney development);GO:0001889(liver development);GO:0001892(embryonic placenta development);GO:0002133(polycystin complex);GO:0005261(cation channel activity);GO:0005262(calcium channel activity);GO:0005515(protein binding);GO:0005634(nucleus);G…	NA	K04985	NA	polycystin 1, transient receptor potential channel interacting [Source:HGNC Symbol;Acc:HGNC:9008]	retained_intron;processed_transcript;protein_coding;nonsense_mediated_decay	DOID:18(urinary_system_disease);DOID:0080001(bone_disease);DOID:17(musculoskeletal_system_disease);DOID:630(genetic_disease);DOID:4(disease);DOID:0050177(monogenic_disease);DOID:10534(stomach_cancer);DOID:0050736(autosomal_dominant_disease);DOID:0080006(bone_development_disease);DOID:557(kidney_disease);DOID:0050739(autosomal_genetic_disease);DOID:13515(tuberous_sclerosis);DOID:1934(dysostosis);D…	R_HSA_1852241(Organelle_biogenesis_and_maintenance);R_HSA_5620916(VxPx_cargo_targeting_to_cilium);R_HSA_5620920(Cargo_trafficking_to_the_periciliary_membrane);R_HSA_5617833(Cilium_Assembly)	1.68957	1.23956	1.64913	5.13818	4.60229	3.64335	0.342074	-1.54762	9.77829e-21	2.04671e-18	down	yes
ENSG00000197081	IGF2R	200732;200736;200738;200737;200735	ENST00000356956;ENST00000650503;ENST00000475834;ENST00000487607;ENST00000649737	GO:0000139(Golgi membrane);GO:0001889(liver development);GO:0001965(G-protein alpha-subunit binding);GO:0001972(retinoic acid binding);GO:0005010(insulin-like growth factor-activated receptor activity);GO:0005515(protein binding);GO:0005520(insulin-like growth factor binding);GO:0005537(mannose binding);GO:0005615(extracellular space);GO:0005634(nucleus);GO:0005641(nuclear envelope lumen);GO:0005…	04142(Lysosome);04144(Endocytosis);04144(Endocytosis)	K06564	NA	insulin like growth factor 2 receptor [Source:HGNC Symbol;Acc:HGNC:5467]	protein_coding;retained_intron	DOID:18(urinary_system_disease);DOID:684(hepatocellular_carcinoma);DOID:3996(urinary_system_cancer);DOID:1307(dementia);DOID:225(syndrome);DOID:0050687(cell_type_cancer);DOID:3571(liver_cancer);DOID:4(disease);DOID:3376(bone_osteosarcoma);DOID:1749(squamous_cell_carcinoma);DOID:1289(neurodegenerative_disease);DOID:4194(glucose_metabolism_disease);DOID:557(kidney_disease);DOID:3856(male_reproducti…	R_HSA_6811442(Intra_Golgi_and_retrograde_Golgi_to_ER_traffic);R_HSA_5653656(Vesicle_mediated_transport);R_HSA_199991(Membrane_Trafficking);R_HSA_432722(Golgi_Associated_Vesicle_Biogenesis);R_HSA_168249(Innate_Immune_System);R_HSA_199992(trans_Golgi_Network_Vesicle_Budding);R_HSA_168256(Immune_System);R_HSA_6798695(Neutrophil_degranulation);R_HSA_6811440(Retrograde_transport_at_the_Trans_Golgi_Net…	1.85181	2.01245	3.31701	9.62312	10.1009	7.51639	0.263625	-1.92344	1.17813e-20	2.45128e-18	down	yes
ENSG00000105464	GRIN2D	122855	ENST00000263269	GO:0001964(startle response);GO:0004970(ionotropic glutamate receptor activity);GO:0004972(NMDA glutamate receptor activity);GO:0005216(ion channel activity);GO:0005515(protein binding);GO:0005886(plasma membrane);GO:0005887(integral component of plasma membrane);GO:0006811(ion transport);GO:0007420(brain development);GO:0008344(adult locomotory behavior);GO:0015276(ligand-gated ion channel activ…	04020(Calcium signaling pathway);04024(cAMP signaling pathway);04080(Neuroactive ligand-receptor interaction);04713(Circadian entrainment);04720(Long-term potentiation);04724(Glutamatergic synapse);05010(Alzheimer disease);05014(Amyotrophic lateral sclerosis (ALS));05030(Cocaine addiction);05031(Amphetamine addiction);05033(Nicotine addiction);05034(Alcoholism)	NA	NA	glutamate ionotropic receptor NMDA type subunit 2D [Source:HGNC Symbol;Acc:HGNC:4588]	protein_coding	NA	R_HSA_9617324(Negative_regulation_of_NMDA_receptor_mediated_neuronal_transmission);R_HSA_6794361(Neurexins_and_neuroligins);R_HSA_5683057(MAPK_family_signaling_cascades);R_HSA_442742(CREB1_phosphorylation_through_NMDA_receptor_mediated_activation_of_RAS_signaling);R_HSA_438066(Unblocking_of_NMDA_receptors,_glutamate_binding_and_activation);R_HSA_112314(Neurotransmitter_receptors_and_postsynaptic_…	1.09397	1.21038	1.28861	4.67974	4.59667	3.12827	0.289645	-1.78764	1.20182e-20	2.48577e-18	down	yes
ENSG00000162772	ATF3	25670;25671;25675;25669;25673;25676;25677;25674	ENST00000465155;ENST00000341491;ENST00000366983;ENST00000613954;ENST00000492118;ENST00000464547;ENST00000613104;ENST00000336937	GO:0000122(negative regulation of transcription by RNA polymerase II);GO:0000790(nuclear chromatin);GO:0000976(transcription regulatory region sequence-specific DNA binding);GO:0000977(RNA polymerase II regulatory region sequence-specific DNA binding);GO:0000978(RNA polymerase II cis-regulatory region sequence-specific DNA binding);GO:0000981(DNA-binding transcription factor activity, RNA polymer…	NA	NA	NA	activating transcription factor 3 [Source:HGNC Symbol;Acc:HGNC:785]	retained_intron;protein_coding;processed_transcript;nonsense_mediated_decay	DOID:3996(urinary_system_cancer);DOID:0080015(physical_disorder);DOID:9279(hyperhomocysteinemia);DOID:654(overnutrition);DOID:0050687(cell_type_cancer);DOID:4(disease);DOID:2994(germ_cell_cancer);DOID:0014667(disease_of_metabolism);DOID:9252(amino_acid_metabolic_disorder);DOID:2154(nephroblastoma);DOID:162(cancer);DOID:1909(melanoma);DOID:4766(embryoma);DOID:14566(disease_of_cellular_proliferatio…	R_HSA_2262752(Cellular_responses_to_stress);R_HSA_9711097(Cellular_response_to_starvation);R_HSA_8953897(Cellular_responses_to_external_stimuli);R_HSA_381042(PERK_regulates_gene_expression);R_HSA_380994(ATF4_activates_genes_in_response_to_endoplasmic_reticulum__stress);R_HSA_9648895(Response_of_EIF2AK1_(HRI)_to_heme_deficiency);R_HSA_9633012(Response_of_EIF2AK4_(GCN2)_to_amino_acid_deficiency);R_…	2.2414	2.21681	1.64456	7.65344	6.90295	5.93888	0.297765	-1.74776	1.22065e-20	2.50988e-18	down	yes
ENSG00000186907	RTN4RL2	41115;41117;41116	ENST00000335099;ENST00000395120;ENST00000533205	GO:0005515(protein binding);GO:0005576(extracellular region);GO:0005615(extracellular space);GO:0005886(plasma membrane);GO:0007166(cell surface receptor signaling pathway);GO:0009897(external side of plasma membrane);GO:0009986(cell surface);GO:0010977(negative regulation of neuron projection development);GO:0016020(membrane);GO:0022038(corpus callosum development);GO:0030424(axon);GO:0030425(de…	NA	K16661	NA	reticulon 4 receptor like 2 [Source:HGNC Symbol;Acc:HGNC:23053]	protein_coding	NA	R_HSA_597592(Post_translational_protein_modification);R_HSA_163125(Post_translational_modification:_synthesis_of_GPI_anchored_proteins);R_HSA_392499(Metabolism_of_proteins)	9.13633	12.032	10.161	33.8773	37.515	25.1687	0.324451	-1.62393	1.30806e-20	2.67387e-18	down	yes
ENSG00000185896	LAMP1	66437;66438;66439	ENST00000332556;ENST00000472564;ENST00000471046	GO:0001618(virus receptor activity);GO:0005515(protein binding);GO:0005737(cytoplasm);GO:0005764(lysosome);GO:0005765(lysosomal membrane);GO:0005768(endosome);GO:0005770(late endosome);GO:0005771(multivesicular body);GO:0005773(vacuole);GO:0005829(cytosol);GO:0005886(plasma membrane);GO:0005887(integral component of plasma membrane);GO:0008021(synaptic vesicle);GO:0008626(granzyme-mediated apopto…	04140(Autophagy - animal);04142(Lysosome);04145(Phagosome);05152(Tuberculosis);05152(Tuberculosis)	K06528	NA	lysosomal associated membrane protein 1 [Source:HGNC Symbol;Acc:HGNC:6499]	protein_coding;retained_intron;processed_transcript	DOID:1240(leukemia);DOID:3275(thymoma);DOID:2531(hematologic_cancer);DOID:3277(thymus_cancer);DOID:0050687(cell_type_cancer);DOID:4(disease);DOID:162(cancer);DOID:1909(melanoma);DOID:14566(disease_of_cellular_proliferation);DOID:0060083(immune_system_cancer);DOID:0050686(organ_system_cancer)	R_HSA_168249(Innate_Immune_System);R_HSA_168256(Immune_System);R_HSA_6798695(Neutrophil_degranulation)	6.45825	5.8745	8.52929	21.8631	21.6631	18.0298	0.338912	-1.56102	1.33876e-20	2.72073e-18	down	yes
ENSG00000188290	HES4	8195;8193;8194;8196	ENST00000481869;ENST00000428771;ENST00000304952;ENST00000484667	GO:0000122(negative regulation of transcription by RNA polymerase II);GO:0000790(nuclear chromatin);GO:0000977(RNA polymerase II regulatory region sequence-specific DNA binding);GO:0000981(DNA-binding transcription factor activity, RNA polymerase II-specific);GO:0001227(DNA-binding transcription repressor activity, RNA polymerase II-specific);GO:0003677(DNA binding);GO:0005634(nucleus);GO:0006355…	05165(Human papillomavirus infection);05165(Human papillomavirus infection)	K09089	NA	hes family bHLH transcription factor 4 [Source:HGNC Symbol;Acc:HGNC:24149]	retained_intron;protein_coding	NA	NA	2.71716	3.54818	2.25442	13.1779	12.5501	11.8762	0.226564	-2.14201	1.5784e-20	3.18919e-18	down	yes
ENSG00000064666	CNN2	112754;112761;112759;112755;112760;112762;112758;112756;112757;112763;112765;112764	ENST00000562015;ENST00000606983;ENST00000562958;ENST00000263097;ENST00000568865;ENST00000562075;ENST00000569352;ENST00000348419;ENST00000565096;ENST00000607102;ENST00000564572;ENST00000566695	GO:0001725(stress fiber);GO:0003779(actin binding);GO:0005515(protein binding);GO:0005516(calmodulin binding);GO:0005576(extracellular region);GO:0005856(cytoskeleton);GO:0005911(cell-cell junction);GO:0005925(focal adhesion);GO:0007010(cytoskeleton organization);GO:0010628(positive regulation of gene expression);GO:0016020(membrane);GO:0030097(hemopoiesis);GO:0030336(negative regulation of cell …	NA	NA	NA	calponin 2 [Source:HGNC Symbol;Acc:HGNC:2156]	protein_coding;nonsense_mediated_decay;retained_intron	NA	R_HSA_447115(Interleukin_12_family_signaling);R_HSA_1280215(Cytokine_Signaling_in_Immune_system);R_HSA_168249(Innate_Immune_System);R_HSA_168256(Immune_System);R_HSA_6798695(Neutrophil_degranulation);R_HSA_9020591(Interleukin_12_signaling);R_HSA_8950505(Gene_and_protein_expression_by_JAK_STAT_signaling_after_Interleukin_12_stimulation);R_HSA_449147(Signaling_by_Interleukins)	6.81084	7.81227	9.44064	27.3486	25.2401	19.8361	0.332258	-1.58962	1.58886e-20	3.19187e-18	down	yes
ENSG00000105290	APLP1	119561;119564;119568;119567;119560;119559;119562;119563;119566;119565;119558;119569	ENST00000652533;ENST00000592316;ENST00000590926;ENST00000587274;ENST00000221891;ENST00000590561;ENST00000586861;ENST00000589743;ENST00000589298;ENST00000588808;ENST00000537454;ENST00000591165	GO:0005515(protein binding);GO:0005604(basement membrane);GO:0005737(cytoplasm);GO:0005886(plasma membrane);GO:0006897(endocytosis);GO:0006915(apoptotic process);GO:0007155(cell adhesion);GO:0007399(nervous system development);GO:0008201(heparin binding);GO:0009887(animal organ morphogenesis);GO:0016020(membrane);GO:0016021(integral component of membrane);GO:0031694(alpha-2A adrenergic receptor b…	NA	NA	NA	amyloid beta precursor like protein 1 [Source:HGNC Symbol;Acc:HGNC:597]	protein_coding;retained_intron;nonsense_mediated_decay;processed_transcript	DOID:0050687(cell_type_cancer);DOID:4(disease);DOID:2994(germ_cell_cancer);DOID:162(cancer);DOID:3095(germ_cell_and_embryonal_cancer);DOID:14566(disease_of_cellular_proliferation);DOID:169(neuroendocrine_tumor);DOID:171(neuroectodermal_tumor)	NA	9.86577	12.4919	10.981	35.4815	33.9138	25.6833	0.350644	-1.51192	1.64031e-20	3.2764e-18	down	yes
ENSG00000124920	MYRF	41890;41879;41878;41881;41887;41885;41886;41889;41888;41884;41882	ENST00000539361;ENST00000537766;ENST00000278836;ENST00000265460;ENST00000675345;ENST00000536352;ENST00000537318;ENST00000675792;ENST00000546247;ENST00000389602;ENST00000675319	GO:0000981(DNA-binding transcription factor activity, RNA polymerase II-specific);GO:0003677(DNA binding);GO:0003700(DNA-binding transcription factor activity);GO:0005634(nucleus);GO:0005654(nucleoplasm);GO:0005737(cytoplasm);GO:0005783(endoplasmic reticulum);GO:0005789(endoplasmic reticulum membrane);GO:0005794(Golgi apparatus);GO:0005829(cytosol);GO:0006355(regulation of transcription, DNA-temp…	NA	NA	NA	myelin regulatory factor [Source:HGNC Symbol;Acc:HGNC:1181]	retained_intron;protein_coding;nonsense_mediated_decay	NA	NA	3.63166	3.41928	4.84241	13.3886	13.5483	9.39371	0.327364	-1.61103	1.73661e-20	3.44905e-18	down	yes
ENSG00000162783	IER5	23606	ENST00000367577	GO:0000159(protein phosphatase type 2A complex);GO:0005515(protein binding);GO:0005634(nucleus);GO:0005654(nucleoplasm);GO:0005730(nucleolus);GO:0005737(cytoplasm);GO:0034605(cellular response to heat);GO:0042127(regulation of cell population proliferation);GO:0042802(identical protein binding);GO:0045944(positive regulation of transcription by RNA polymerase II);GO:1900036(positive regulation of…	NA	NA	NA	immediate early response 5 [Source:HGNC Symbol;Acc:HGNC:5393]	protein_coding	NA	NA	10.1277	10.5468	7.73956	32.1295	27.5405	24.6642	0.336922	-1.56951	1.77644e-20	3.50822e-18	down	yes
ENSG00000142871	CCN1	16597;16600;16599;16598;16601;16602	ENST00000451137;ENST00000674743;ENST00000674818;ENST00000676007;ENST00000480413;ENST00000675083	GO:0000166(nucleotide binding);GO:0001649(osteoblast differentiation);GO:0001934(positive regulation of protein phosphorylation);GO:0002041(intussusceptive angiogenesis);GO:0003181(atrioventricular valve morphogenesis);GO:0003278(apoptotic process involved in heart morphogenesis);GO:0003281(ventricular septum development);GO:0005178(integrin binding);GO:0005201(extracellular matrix structural con…	NA	NA	NA	cellular communication network factor 1 [Source:HGNC Symbol;Acc:HGNC:2654]	protein_coding;retained_intron;processed_transcript;nonsense_mediated_decay	DOID:0080001(bone_disease);DOID:684(hepatocellular_carcinoma);DOID:3996(urinary_system_cancer);DOID:2871(endometrial_carcinoma);DOID:10286(prostate_carcinoma);DOID:10591(pre_eclampsia);DOID:934(viral_infectious_disease);DOID:1324(lung_cancer);DOID:17(musculoskeletal_system_disease);DOID:225(syndrome);DOID:0050687(cell_type_cancer);DOID:3571(liver_cancer);DOID:0050117(disease_by_infectious_agent);…	R_HSA_597592(Post_translational_protein_modification);R_HSA_392499(Metabolism_of_proteins);R_HSA_381426(Regulation_of_Insulin_like_Growth_Factor_(IGF)_transport_and_uptake_by_Insulin_like_Growth_Factor_Binding_Proteins_(IGFBPs));R_HSA_8957275(Post_translational_protein_phosphorylation)	6.75143	6.57738	6.27586	19.7928	17.4899	14.5325	0.378358	-1.40218	1.8146e-20	3.56344e-18	down	yes
ENSG00000141738	GRB7	100370;100365;100373;100364;100366;100377;100375;100369;100376;100368	ENST00000394211;ENST00000309156;ENST00000394209;ENST00000577695;ENST00000485182;ENST00000473071;ENST00000394204;ENST00000584819;ENST00000461756;ENST00000584853	GO:0003723(RNA binding);GO:0005070(SH3/SH2 adaptor activity);GO:0005515(protein binding);GO:0005737(cytoplasm);GO:0005829(cytosol);GO:0005886(plasma membrane);GO:0005925(focal adhesion);GO:0007165(signal transduction);GO:0007173(epidermal growth factor receptor signaling pathway);GO:0007411(axon guidance);GO:0008289(lipid binding);GO:0010494(cytoplasmic stress granule);GO:0016020(membrane);GO:001…	NA	NA	NA	growth factor receptor bound protein 7 [Source:HGNC Symbol;Acc:HGNC:4567]	protein_coding;retained_intron;processed_transcript	DOID:684(hepatocellular_carcinoma);DOID:1240(leukemia);DOID:2531(hematologic_cancer);DOID:630(genetic_disease);DOID:225(syndrome);DOID:3571(liver_cancer);DOID:1037(lymphoblastic_leukemia);DOID:4(disease);DOID:162(cancer);DOID:3119(gastrointestinal_system_cancer);DOID:14566(disease_of_cellular_proliferation);DOID:1036(chronic_leukemia);DOID:686(liver_carcinoma);DOID:14681(Silver_Russell_syndrome);…	R_HSA_194315(Signaling_by_Rho_GTPases);R_HSA_9012999(RHO_GTPase_cycle);R_HSA_210993(Tie2_Signaling);R_HSA_202733(Cell_surface_interactions_at_the_vascular_wall);R_HSA_9716542(Signaling_by_Rho_GTPases,_Miro_GTPases_and_RHOBTB3);R_HSA_1306955(GRB7_events_in_ERBB2_signaling);R_HSA_1266738(Developmental_Biology);R_HSA_186763(Downstream_signal_transduction);R_HSA_162582(Signal_Transduction);R_HSA_1227…	1.69372	2.77274	1.80118	9.62451	8.14377	8.36032	0.239877	-2.05964	1.90164e-20	3.71351e-18	down	yes
ENSG00000178719	GRINA	221342;221351;221347;221346;221344;221348;221343;221350;221349	ENST00000395068;ENST00000533377;ENST00000534791;ENST00000531992;ENST00000529301;ENST00000525513;ENST00000313269;ENST00000527194;ENST00000533044	GO:0005515(protein binding);GO:0005783(endoplasmic reticulum);GO:0005794(Golgi apparatus);GO:0016020(membrane);GO:0016021(integral component of membrane);GO:0032469(endoplasmic reticulum calcium ion homeostasis);GO:0044325(ion channel binding);GO:1902236(negative regulation of endoplasmic reticulum stress-induced intrinsic apoptotic signaling pathway);GO:1902236(negative regulation of endoplasmic…	NA	NA	NA	glutamate ionotropic receptor NMDA type subunit associated protein 1 [Source:HGNC Symbol;Acc:HGNC:4589]	protein_coding;retained_intron	NA	NA	15.0314	19.0818	19.747	59.3081	52.4387	44.8187	0.344011	-1.53947	2.19329e-20	4.25925e-18	down	yes
ENSG00000011422	PLAUR	121653;121659;121647;121655;121648;121646;121644;121651;121650;121645;121652;121656;121654;121649;121658;121660	ENST00000597107;ENST00000599546;ENST00000340093;ENST00000593939;ENST00000221264;ENST00000601723;ENST00000339082;ENST00000593714;ENST00000594364;ENST00000593447;ENST00000599892;ENST00000593396;ENST00000602141;ENST00000595038;ENST00000598875;ENST00000601876	GO:0001934(positive regulation of protein phosphorylation);GO:0005102(signaling receptor binding);GO:0005515(protein binding);GO:0005576(extracellular region);GO:0005788(endoplasmic reticulum lumen);GO:0005789(endoplasmic reticulum membrane);GO:0005886(plasma membrane);GO:0005887(integral component of plasma membrane);GO:0005925(focal adhesion);GO:0006935(chemotaxis);GO:0007165(signal transductio…	04610(Complement and coagulation cascades);05205(Proteoglycans in cancer);05205(Proteoglycans in cancer)	K03985	NA	plasminogen activator, urokinase receptor [Source:HGNC Symbol;Acc:HGNC:9053]	nonsense_mediated_decay;protein_coding;retained_intron	DOID:18(urinary_system_disease);DOID:684(hepatocellular_carcinoma);DOID:3996(urinary_system_cancer);DOID:1307(dementia);DOID:2394(ovarian_cancer);DOID:2871(endometrial_carcinoma);DOID:0002116(pterygium);DOID:1240(leukemia);DOID:934(viral_infectious_disease);DOID:1612(breast_cancer);DOID:3458(breast_adenocarcinoma);DOID:9119(acute_myeloid_leukemia);DOID:2531(hematologic_cancer);DOID:1324(lung_canc…	R_HSA_597592(Post_translational_protein_modification);R_HSA_75205(Dissolution_of_Fibrin_Clot);R_HSA_168249(Innate_Immune_System);R_HSA_168256(Immune_System);R_HSA_162791(Attachment_of_GPI_anchor_to_uPAR);R_HSA_163125(Post_translational_modification:_synthesis_of_GPI_anchored_proteins);R_HSA_6798695(Neutrophil_degranulation);R_HSA_392499(Metabolism_of_proteins);R_HSA_109582(Hemostasis)	4.27893	5.80116	3.25122	17.6904	17.1579	14.984	0.267523	-1.90226	2.35822e-20	4.55423e-18	down	yes
ENSG00000197183	NOL4L	144954;144967;144961;144955;144960;144958;144959;144963	ENST00000359676;ENST00000485364;ENST00000375678;ENST00000621426;ENST00000375677;ENST00000475781;ENST00000326071;ENST00000201961	GO:0005515(protein binding);GO:0005654(nucleoplasm);GO:0005730(nucleolus);GO:0005829(cytosol);GO:0005829(cytosol)	NA	NA	NA	nucleolar protein 4 like [Source:HGNC Symbol;Acc:HGNC:16106]	protein_coding;processed_transcript;nonsense_mediated_decay	NA	NA	1.52548	1.82695	1.96932	5.93836	5.59145	4.34787	0.335172	-1.57703	2.77675e-20	5.33304e-18	down	yes
ENSG00000149115	TNKS1BP1	41064;41067;41063;41066;41062;41065;41068	ENST00000358252;ENST00000530920;ENST00000532273;ENST00000427750;ENST00000528882;ENST00000532437;ENST00000527207	GO:0000289(nuclear-transcribed mRNA poly(A) tail shortening);GO:0005515(protein binding);GO:0005634(nucleus);GO:0005694(chromosome);GO:0005720(nuclear heterochromatin);GO:0005737(cytoplasm);GO:0005829(cytosol);GO:0005856(cytoskeleton);GO:0005912(adherens junction);GO:0006302(double-strand break repair);GO:0006977(DNA damage response, signal transduction by p53 class mediator resulting in cell cyc…	NA	NA	NA	tankyrase 1 binding protein 1 [Source:HGNC Symbol;Acc:HGNC:19081]	protein_coding;retained_intron;nonsense_mediated_decay	NA	R_HSA_212436(Generic_Transcription_Pathway);R_HSA_6791312(TP53_Regulates_Transcription_of_Cell_Cycle_Genes);R_HSA_74160(Gene_expression_(Transcription));R_HSA_6804115(TP53_regulates_transcription_of_additional_cell_cycle_genes_whose_exact_role_in_the_p53_pathway_remain_uncertain);R_HSA_3700989(Transcriptional_Regulation_by_TP53);R_HSA_8953854(Metabolism_of_RNA);R_HSA_73857(RNA_Polymerase_II_Trans…	6.16948	6.06251	8.2118	21.8535	20.9037	16.1289	0.347175	-1.52626	3.08179e-20	5.88655e-18	down	yes
ENSG00000185950	IRS2	66129	ENST00000375856	GO:0000165(MAPK cascade);GO:0002053(positive regulation of mesenchymal cell proliferation);GO:0002903(negative regulation of B cell apoptotic process);GO:0005158(insulin receptor binding);GO:0005515(protein binding);GO:0005737(cytoplasm);GO:0005829(cytosol);GO:0005886(plasma membrane);GO:0006006(glucose metabolic process);GO:0007165(signal transduction);GO:0007411(axon guidance);GO:0007420(brain …	04022(cGMP-PKG signaling pathway);04068(FoxO signaling pathway);04140(Autophagy - animal);04152(AMPK signaling pathway);04211(Longevity regulating pathway);04213(Longevity regulating pathway - multiple species);04910(Insulin signaling pathway);04920(Adipocytokine signaling pathway);04923(Regulation of lipolysis in adipocytes);04930(Type II diabetes mellitus);04931(Insulin resistance);04932(Non-al…	K07187	NA	insulin receptor substrate 2 [Source:HGNC Symbol;Acc:HGNC:6126]	protein_coding	DOID:0080001(bone_disease);DOID:934(viral_infectious_disease);DOID:28(endocrine_system_disease);DOID:654(overnutrition);DOID:17(musculoskeletal_system_disease);DOID:0080011(bone_resorption_disease);DOID:225(syndrome);DOID:11981(morbid_obesity);DOID:0050117(disease_by_infectious_agent);DOID:4(disease);DOID:409(liver_disease);DOID:77(gastrointestinal_system_disease);DOID:1923(sex_differentiation_di…	R_HSA_982772(Growth_hormone_receptor_signaling);R_HSA_166520(Signaling_by_NTRKs);R_HSA_9027277(Erythropoietin_activates_Phospholipase_C_gamma_(PLCG));R_HSA_9006335(Signaling_by_Erythropoietin);R_HSA_5683057(MAPK_family_signaling_cascades);R_HSA_112399(IRS_mediated_signalling);R_HSA_109704(PI3K_Cascade);R_HSA_9006925(Intracellular_signaling_by_second_messengers);R_HSA_1280215(Cytokine_Signaling_in…	2.91543	2.77087	4.30272	11.5831	11.6936	9.22464	0.307341	-1.70209	3.29877e-20	6.26677e-18	down	yes
ENSG00000032444	PNPLA6	114418;114422;114413;114414;114433;114411;114432;114417;114435;114415;114427;114425;114412;114419;114424;114416;114431;114428;114420;114430;114423;114426;114421;114429	ENST00000414982;ENST00000600737;ENST00000601668;ENST00000594098;ENST00000595352;ENST00000221249;ENST00000646984;ENST00000596515;ENST00000597202;ENST00000601001;ENST00000599311;ENST00000595264;ENST00000594754;ENST00000450331;ENST00000598462;ENST00000545201;ENST00000599951;ENST00000595176;ENST00000600942;ENST00000594864;ENST00000602191;ENST00000594551;ENST00000593924;ENST00000595889	GO:0004622(lysophospholipase activity);GO:0005783(endoplasmic reticulum);GO:0005789(endoplasmic reticulum membrane);GO:0006629(lipid metabolic process);GO:0016020(membrane);GO:0016021(integral component of membrane);GO:0016042(lipid catabolic process);GO:0016787(hydrolase activity);GO:0046470(phosphatidylcholine metabolic process);GO:0046475(glycerophospholipid catabolic process);GO:0102545(phosp…	00564(Glycerophospholipid metabolism);00564(Glycerophospholipid metabolism)	K14676	EC:3.1.1.5	patatin like phospholipase domain containing 6 [Source:HGNC Symbol;Acc:HGNC:16268]	protein_coding;retained_intron;processed_transcript	DOID:4(disease);DOID:1192(peripheral_nervous_system_neoplasm);DOID:1289(neurodegenerative_disease);DOID:2621(autonomic_nervous_system_neoplasm);DOID:162(cancer);DOID:863(nervous_system_disease);DOID:769(neuroblastoma);DOID:14566(disease_of_cellular_proliferation);DOID:331(central_nervous_system_disease);DOID:231(motor_neuron_disease);DOID:0050686(organ_system_cancer);DOID:3093(nervous_system_canc…	R_HSA_1483255(PI_Metabolism);R_HSA_6814848(Glycerophospholipid_catabolism);R_HSA_556833(Metabolism_of_lipids);R_HSA_1483257(Phospholipid_metabolism);R_HSA_1430728(Metabolism)	2.59643	2.65013	3.02715	8.7669	8.44966	6.08911	0.355008	-1.49408	3.92237e-20	7.39691e-18	down	yes
ENSG00000186187	ZNRF1	92580;92581;92582;92590;92589;92588;92584;92587;92585;92586;92583	ENST00000335325;ENST00000320619;ENST00000566250;ENST00000568844;ENST00000568494;ENST00000568351;ENST00000564320;ENST00000566244;ENST00000568511;ENST00000579084;ENST00000567962	GO:0000209(protein polyubiquitination);GO:0004842(ubiquitin-protein transferase activity);GO:0005515(protein binding);GO:0005764(lysosome);GO:0005768(endosome);GO:0005829(cytosol);GO:0016020(membrane);GO:0016567(protein ubiquitination);GO:0016740(transferase activity);GO:0030054(cell junction);GO:0030672(synaptic vesicle membrane);GO:0031410(cytoplasmic vesicle);GO:0043161(proteasome-mediated ubi…	NA	K10694	EC:2.3.2.27	zinc and ring finger 1 [Source:HGNC Symbol;Acc:HGNC:18452]	protein_coding;retained_intron;processed_transcript	NA	R_HSA_983169(Class_I_MHC_mediated_antigen_processing_&_presentation);R_HSA_168256(Immune_System);R_HSA_983168(Antigen_processing:_Ubiquitination_&_Proteasome_degradation);R_HSA_1280218(Adaptive_Immune_System)	0.866631	1.14087	0.997271	4.4963	3.65555	2.68796	0.277198	-1.85101	3.93599e-20	7.39691e-18	down	yes
ENSG00000013588	GPRC5A	51617;51621;51616;51620;51618;51619	ENST00000014914;ENST00000540125;ENST00000537783;ENST00000648791;ENST00000542056;ENST00000534831	GO:0004930(G protein-coupled receptor activity);GO:0005515(protein binding);GO:0005730(nucleolus);GO:0005886(plasma membrane);GO:0005887(integral component of plasma membrane);GO:0007165(signal transduction);GO:0007175(negative regulation of epidermal growth factor-activated receptor activity);GO:0007186(G protein-coupled receptor signaling pathway);GO:0016020(membrane);GO:0016021(integral compon…	NA	NA	NA	G protein-coupled receptor class C group 5 member A [Source:HGNC Symbol;Acc:HGNC:9836]	protein_coding;retained_intron;processed_transcript	DOID:0050687(cell_type_cancer);DOID:4(disease);DOID:2994(germ_cell_cancer);DOID:162(cancer);DOID:4766(embryoma);DOID:14566(disease_of_cellular_proliferation);DOID:688(embryonal_cancer)	NA	16.2218	22.1713	11.4813	72.946	73.9742	49.4192	0.254021	-1.97698	4.98275e-20	9.31401e-18	down	yes
ENSG00000196557	CACNA1H	84042;84054;84047;84053;84050;84055;84044;84056;84052;84043;84045	ENST00000348261;ENST00000564231;ENST00000565831;ENST00000562079;ENST00000564954;ENST00000569107;ENST00000638323;ENST00000569953;ENST00000637236;ENST00000358590;ENST00000639478	GO:0001518(voltage-gated sodium channel complex);GO:0005216(ion channel activity);GO:0005244(voltage-gated ion channel activity);GO:0005245(voltage-gated calcium channel activity);GO:0005248(voltage-gated sodium channel activity);GO:0005261(cation channel activity);GO:0005262(calcium channel activity);GO:0005515(protein binding);GO:0005886(plasma membrane);GO:0005887(integral component of plasma …	04010(MAPK signaling pathway);04020(Calcium signaling pathway);04713(Circadian entrainment);04925(Aldosterone synthesis and secretion);04927(Cortisol synthesis and secretion);04934(Cushing syndrome);04934(Cushing syndrome)	NA	NA	calcium voltage-gated channel subunit alpha1 H [Source:HGNC Symbol;Acc:HGNC:1395]	protein_coding;retained_intron;nonsense_mediated_decay	DOID:0060037(developmental_disorder_of_mental_health);DOID:225(syndrome);DOID:0060040(pervasive_developmental_disorder);DOID:936(brain_disease);DOID:4(disease);DOID:1681(heart_septal_defect);DOID:3856(male_reproductive_organ_cancer);DOID:1882(atrial_heart_septal_defect);DOID:114(heart_disease);DOID:162(cancer);DOID:863(nervous_system_disease);DOID:14566(disease_of_cellular_proliferation);DOID:006…	R_HSA_375165(NCAM_signaling_for_neurite_out_growth);R_HSA_1266738(Developmental_Biology);R_HSA_419037(NCAM1_interactions);R_HSA_9675108(Nervous_system_development);R_HSA_422475(Axon_guidance)	2.96388	2.90897	3.59038	9.92783	10.0714	6.87706	0.352103	-1.50593	5.53693e-20	1.02949e-17	down	yes
ENSG00000160767	FAM189B	21012;21013;21020;21015;21011;21018;21014;21019;21016;21017	ENST00000361361;ENST00000368366;ENST00000481822;ENST00000621094;ENST00000350210;ENST00000497941;ENST00000368368;ENST00000472550;ENST00000487649;ENST00000491082	GO:0005515(protein binding);GO:0008150(biological_process);GO:0016020(membrane);GO:0016021(integral component of membrane);GO:0050699(WW domain binding);GO:0050699(WW domain binding)	NA	NA	NA	family with sequence similarity 189 member B [Source:HGNC Symbol;Acc:HGNC:1233]	protein_coding;retained_intron;processed_transcript;nonsense_mediated_decay	NA	NA	1.58331	1.55289	1.90656	5.52149	5.55148	4.47189	0.3244	-1.62415	6.04891e-20	1.11873e-17	down	yes
ENSG00000005884	ITGA3	102953;102952;102964;102951;102961;102955;102962;102950;102965;102956;102963;102957;102958;102959;102954	ENST00000007722;ENST00000320031;ENST00000506437;ENST00000505306;ENST00000507771;ENST00000570989;ENST00000515147;ENST00000506401;ENST00000514834;ENST00000512553;ENST00000504417;ENST00000505552;ENST00000510809;ENST00000505612;ENST00000508100	GO:0001764(neuron migration);GO:0001968(fibronectin binding);GO:0002020(protease binding);GO:0005178(integrin binding);GO:0005515(protein binding);GO:0005518(collagen binding);GO:0005886(plasma membrane);GO:0005925(focal adhesion);GO:0007155(cell adhesion);GO:0007160(cell-matrix adhesion);GO:0007229(integrin-mediated signaling pathway);GO:0007507(heart development);GO:0007613(memory);GO:0008305(i…	04151(PI3K-Akt signaling pathway);04510(Focal adhesion);04512(ECM-receptor interaction);04640(Hematopoietic cell lineage);04810(Regulation of actin cytoskeleton);05165(Human papillomavirus infection);05200(Pathways in cancer);05222(Small cell lung cancer);05410(Hypertrophic cardiomyopathy (HCM));05412(Arrhythmogenic right ventricular cardiomyopathy (ARVC));05414(Dilated cardiomyopathy (DCM));0541…	K06482	NA	integrin subunit alpha 3 [Source:HGNC Symbol;Acc:HGNC:6139]	protein_coding;retained_intron;nonsense_mediated_decay	DOID:684(hepatocellular_carcinoma);DOID:3996(urinary_system_cancer);DOID:3620(central_nervous_system_cancer);DOID:0050687(cell_type_cancer);DOID:3571(liver_cancer);DOID:4(disease);DOID:10534(stomach_cancer);DOID:1749(squamous_cell_carcinoma);DOID:2994(germ_cell_cancer);DOID:170(endocrine_gland_cancer);DOID:3498(pancreatic_ductal_adenocarcinoma);DOID:162(cancer);DOID:1909(melanoma);DOID:3119(gastr…	R_HSA_210991(Basigin_interactions);R_HSA_1474244(Extracellular_matrix_organization);R_HSA_202733(Cell_surface_interactions_at_the_vascular_wall);R_HSA_3000157(Laminin_interactions);R_HSA_6806834(Signaling_by_MET);R_HSA_162582(Signal_Transduction);R_HSA_216083(Integrin_cell_surface_interactions);R_HSA_109582(Hemostasis);R_HSA_8875878(MET_promotes_cell_motility);R_HSA_9006934(Signaling_by_Receptor_…	22.6903	32.3586	22.5283	87.753	87.2493	65.9904	0.321907	-1.63528	6.60063e-20	1.21434e-17	down	yes
ENSG00000185818	NAT8L	170908	ENST00000423729	GO:0005515(protein binding);GO:0005737(cytoplasm);GO:0005739(mitochondrion);GO:0005759(mitochondrial matrix);GO:0005783(endoplasmic reticulum);GO:0008080(N-acetyltransferase activity);GO:0008652(cellular amino acid biosynthetic process);GO:0016020(membrane);GO:0016021(integral component of membrane);GO:0016740(transferase activity);GO:0016746(transferase activity, transferring acyl groups);GO:001…	00250(Alanine, aspartate and glutamate metabolism)	K18309	EC:2.3.1.17	N-acetyltransferase 8 like [Source:HGNC Symbol;Acc:HGNC:26742]	protein_coding	NA	R_HSA_71291(Metabolism_of_amino_acids_and_derivatives);R_HSA_8963693(Aspartate_and_asparagine_metabolism);R_HSA_1430728(Metabolism)	1.02717	0.913809	1.09353	3.98313	4.11723	2.51177	0.285947	-1.80618	6.74137e-20	1.23374e-17	down	yes
ENSG00000067082	KLF6	28349;28353;28352;28354;28350;28351	ENST00000497571;ENST00000469435;ENST00000492125;ENST00000380946;ENST00000542957;ENST00000173785	GO:0000790(nuclear chromatin);GO:0000976(transcription regulatory region sequence-specific DNA binding);GO:0000978(RNA polymerase II cis-regulatory region sequence-specific DNA binding);GO:0000981(DNA-binding transcription factor activity, RNA polymerase II-specific);GO:0001228(DNA-binding transcription activator activity, RNA polymerase II-specific);GO:0001650(fibrillar center);GO:0003676(nuclei…	NA	NA	NA	Kruppel like factor 6 [Source:HGNC Symbol;Acc:HGNC:2235]	protein_coding;processed_transcript	DOID:684(hepatocellular_carcinoma);DOID:3996(urinary_system_cancer);DOID:1324(lung_cancer);DOID:0050687(cell_type_cancer);DOID:3571(liver_cancer);DOID:4(disease);DOID:409(liver_disease);DOID:77(gastrointestinal_system_disease);DOID:9455(lipid_storage_disease);DOID:3856(male_reproductive_organ_cancer);DOID:0014667(disease_of_metabolism);DOID:3905(lung_carcinoma);DOID:162(cancer);DOID:1909(melanoma…	NA	5.51004	5.29051	6.01529	15.9757	14.0563	12.899	0.391694	-1.3522	7.09748e-20	1.29215e-17	down	yes
ENSG00000146112	PPP1R18	193136;193135;193131;193133;193132;193134	ENST00000615527;ENST00000399199;ENST00000615892;ENST00000467662;ENST00000274853;ENST00000488324	GO:0003779(actin binding);GO:0005515(protein binding);GO:0005737(cytoplasm);GO:0005856(cytoskeleton);GO:0019902(phosphatase binding);GO:0019902(phosphatase binding)	NA	K17559	NA	protein phosphatase 1 regulatory subunit 18 [Source:HGNC Symbol;Acc:HGNC:29413]	protein_coding;processed_transcript	NA	NA	3.87428	7.05167	4.65087	23.3996	20.8679	16.984	0.254309	-1.97535	7.17219e-20	1.29898e-17	down	yes
ENSG00000111799	COL12A1	196594;196592;196597;196598;196599;196601;196602;196600;196593	ENST00000322507;ENST00000425443;ENST00000483888;ENST00000511023;ENST00000493109;ENST00000474564;ENST00000486533;ENST00000419671;ENST00000615798	GO:0005515(protein binding);GO:0005576(extracellular region);GO:0005581(collagen trimer);GO:0005595(collagen type XII trimer);GO:0005615(extracellular space);GO:0005788(endoplasmic reticulum lumen);GO:0007155(cell adhesion);GO:0030020(extracellular matrix structural constituent conferring tensile strength);GO:0030199(collagen fibril organization);GO:0035987(endodermal cell differentiation);GO:006…	04974(Protein digestion and absorption);04974(Protein digestion and absorption)	NA	NA	collagen type XII alpha 1 chain [Source:HGNC Symbol;Acc:HGNC:2188]	protein_coding;processed_transcript;retained_intron	NA	R_HSA_1474290(Collagen_formation);R_HSA_1442490(Collagen_degradation);R_HSA_1474244(Extracellular_matrix_organization);R_HSA_1650814(Collagen_biosynthesis_and_modifying_enzymes);R_HSA_8948216(Collagen_chain_trimerization);R_HSA_2022090(Assembly_of_collagen_fibrils_and_other_multimeric_structures);R_HSA_1474228(Degradation_of_the_extracellular_matrix)	2.36507	2.34868	1.90129	6.00245	6.54994	5.23603	0.371873	-1.42712	8.13553e-20	1.46586e-17	down	yes
ENSG00000168056	LTBP3	43139;43144;43150;43147;43137;43149;43142;43154;43141;43145;43151;43156;43148;43152;43153;43140;43138;43146;43143;43157;43155	ENST00000301873;ENST00000526927;ENST00000525443;ENST00000530866;ENST00000322147;ENST00000530990;ENST00000532932;ENST00000527792;ENST00000529189;ENST00000532661;ENST00000527339;ENST00000530426;ENST00000526124;ENST00000528966;ENST00000529764;ENST00000530785;ENST00000529582;ENST00000529371;ENST00000528516;ENST00000524798;ENST00000526825	GO:0001501(skeletal system development);GO:0005509(calcium ion binding);GO:0005576(extracellular region);GO:0007179(transforming growth factor beta receptor signaling pathway);GO:0019838(growth factor binding);GO:0030502(negative regulation of bone mineralization);GO:0032331(negative regulation of chondrocyte differentiation);GO:0036363(transforming growth factor beta activation);GO:0045780(posit…	NA	K08023	NA	latent transforming growth factor beta binding protein 3 [Source:HGNC Symbol;Acc:HGNC:6716]	protein_coding;retained_intron;nonsense_mediated_decay	NA	R_HSA_1474244(Extracellular_matrix_organization);R_HSA_1566948(Elastic_fibre_formation);R_HSA_2129379(Molecules_associated_with_elastic_fibres)	2.49754	2.1563	3.79888	11.1366	10.4964	8.19261	0.283405	-1.81906	8.64802e-20	1.55021e-17	down	yes
ENSG00000099864	PALM	112636;112637;112635;112642;112638;112641;112640;112643;112639;112645	ENST00000264560;ENST00000592870;ENST00000338448;ENST00000633534;ENST00000589012;ENST00000593172;ENST00000586776;ENST00000592155;ENST00000586055;ENST00000587513	GO:0005515(protein binding);GO:0005654(nucleoplasm);GO:0005737(cytoplasm);GO:0005886(plasma membrane);GO:0007010(cytoskeleton organization);GO:0007193(adenylate cyclase-inhibiting G protein-coupled receptor signaling pathway);GO:0007194(negative regulation of adenylate cyclase activity);GO:0008104(protein localization);GO:0008360(regulation of cell shape);GO:0014069(postsynaptic density);GO:00160…	NA	NA	NA	paralemmin [Source:HGNC Symbol;Acc:HGNC:8594]	protein_coding;retained_intron;processed_transcript	NA	NA	2.18863	2.10484	2.43688	7.89653	6.78836	5.3783	0.335457	-1.5758	9.28062e-20	1.64981e-17	down	yes
ENSG00000130202	NECTIN2	121927;121928;121933;121930;121929	ENST00000252485;ENST00000252483;ENST00000592018;ENST00000587386;ENST00000591581	GO:0001618(virus receptor activity);GO:0001675(acrosome assembly);GO:0002860(positive regulation of natural killer cell mediated cytotoxicity directed against tumor cell target);GO:0002891(positive regulation of immunoglobulin mediated immune response);GO:0005515(protein binding);GO:0005886(plasma membrane);GO:0005911(cell-cell junction);GO:0005915(zonula adherens);GO:0005925(focal adhesion);GO:0…	04514(Cell adhesion molecules (CAMs));04520(Adherens junction);04520(Adherens junction)	NA	NA	nectin cell adhesion molecule 2 [Source:HGNC Symbol;Acc:HGNC:9707]	protein_coding;retained_intron	DOID:1240(leukemia);DOID:2531(hematologic_cancer);DOID:0080015(physical_disorder);DOID:2377(multiple_sclerosis);DOID:1037(lymphoblastic_leukemia);DOID:4(disease);DOID:8692(myeloid_leukemia);DOID:1289(neurodegenerative_disease);DOID:9256(colorectal_cancer);DOID:5672(large_intestine_cancer);DOID:162(cancer);DOID:3119(gastrointestinal_system_cancer);DOID:863(nervous_system_disease);DOID:674(cleft_pa…	R_HSA_446728(Cell_junction_organization);R_HSA_198933(Immunoregulatory_interactions_between_a_Lymphoid_and_a_non_Lymphoid_cell);R_HSA_168256(Immune_System);R_HSA_418990(Adherens_junctions_interactions);R_HSA_421270(Cell_cell_junction_organization);R_HSA_1500931(Cell_Cell_communication);R_HSA_1280218(Adaptive_Immune_System);R_HSA_420597(Nectin/Necl__trans_heterodimerization)	13.4111	18.1225	15.8124	49.108	47.7129	37.5339	0.352396	-1.50473	9.29802e-20	1.64981e-17	down	yes
ENSG00000105281	SLC1A5	122505;122506;122508;122509;122507	ENST00000542575;ENST00000434726;ENST00000412532;ENST00000593713;ENST00000594991	GO:0001618(virus receptor activity);GO:0005515(protein binding);GO:0005886(plasma membrane);GO:0005887(integral component of plasma membrane);GO:0006865(amino acid transport);GO:0006868(glutamine transport);GO:0009925(basal plasma membrane);GO:0010585(glutamine secretion);GO:0015171(amino acid transmembrane transporter activity);GO:0015175(neutral amino acid transmembrane transporter activity);GO…	04974(Protein digestion and absorption);05230(Central carbon metabolism in cancer);05230(Central carbon metabolism in cancer)	NA	NA	solute carrier family 1 member 5 [Source:HGNC Symbol;Acc:HGNC:10943]	protein_coding	DOID:684(hepatocellular_carcinoma);DOID:10591(pre_eclampsia);DOID:3571(liver_cancer);DOID:4(disease);DOID:5419(schizophrenia);DOID:0050828(artery_disease);DOID:0014667(disease_of_metabolism);DOID:9252(amino_acid_metabolic_disorder);DOID:162(cancer);DOID:3119(gastrointestinal_system_cancer);DOID:2468(psychotic_disorder);DOID:14566(disease_of_cellular_proliferation);DOID:686(liver_carcinoma);DOID:1…	R_HSA_194315(Signaling_by_Rho_GTPases);R_HSA_9012999(RHO_GTPase_cycle);R_HSA_382551(Transport_of_small_molecules);R_HSA_425407(SLC_mediated_transmembrane_transport);R_HSA_352230(Amino_acid_transport_across_the_plasma_membrane);R_HSA_9013149(RAC1_GTPase_cycle);R_HSA_9716542(Signaling_by_Rho_GTPases,_Miro_GTPases_and_RHOBTB3);R_HSA_9013407(RHOH_GTPase_cycle);R_HSA_9013423(RAC3_GTPase_cycle);R_HSA_9…	30.4777	33.049	35.5236	87.3624	87.6806	68.1756	0.407248	-1.29602	9.70987e-20	1.70968e-17	down	yes
ENSG00000120896	SORBS3	213837;213841;213842;213838;213835;213846;213839;213844;213828;213847;213831;213830;213836;213840;213833;213848;213832;213845;213825;213829	ENST00000523740;ENST00000523965;ENST00000521554;ENST00000522315;ENST00000520574;ENST00000517962;ENST00000519453;ENST00000522721;ENST00000240123;ENST00000520207;ENST00000523402;ENST00000517535;ENST00000521787;ENST00000523900;ENST00000524057;ENST00000519127;ENST00000520563;ENST00000523348;ENST00000522037;ENST00000517500	GO:0000122(negative regulation of transcription by RNA polymerase II);GO:0005200(structural constituent of cytoskeleton);GO:0005515(protein binding);GO:0005634(nucleus);GO:0005737(cytoplasm);GO:0005829(cytosol);GO:0005856(cytoskeleton);GO:0005925(focal adhesion);GO:0006936(muscle contraction);GO:0007015(actin filament organization);GO:0007155(cell adhesion);GO:0008134(transcription factor binding…	NA	NA	NA	sorbin and SH3 domain containing 3 [Source:HGNC Symbol;Acc:HGNC:30907]	processed_transcript;protein_coding;retained_intron;nonsense_mediated_decay	DOID:0050687(cell_type_cancer);DOID:4(disease);DOID:1749(squamous_cell_carcinoma);DOID:162(cancer);DOID:14566(disease_of_cellular_proliferation);DOID:305(carcinoma)	R_HSA_397014(Muscle_contraction);R_HSA_445355(Smooth_Muscle_Contraction)	2.61644	2.64015	3.38877	8.95103	8.83042	7.05033	0.348157	-1.52219	9.73328e-20	1.70968e-17	down	yes
ENSG00000276168	RN7SL1	69389	ENST00000618786	NA	NA	NA	NA	RNA component of signal recognition particle 7SL1 [Source:HGNC Symbol;Acc:HGNC:10038]	misc_RNA	NA	NA	555.147	237.146	226.701	9.07704	6.03891	12.1451	37.3791	5.22416	1.09597e-19	1.91547e-17	up	yes
ENSG00000128708	HAT1	137452;137451;137456;137453;137455;137454	ENST00000264108;ENST00000412731;ENST00000392584;ENST00000460481;ENST00000494601;ENST00000457761	GO:0000784(nuclear chromosome, telomeric region);GO:0000790(nuclear chromatin);GO:0004402(histone acetyltransferase activity);GO:0005515(protein binding);GO:0005634(nucleus);GO:0005654(nucleoplasm);GO:0005737(cytoplasm);GO:0006323(DNA packaging);GO:0006325(chromatin organization);GO:0006335(DNA replication-dependent nucleosome assembly);GO:0006336(DNA replication-independent nucleosome assembly);…	05034(Alcoholism);05034(Alcoholism)	K11303	EC:2.3.1.48	histone acetyltransferase 1 [Source:HGNC Symbol;Acc:HGNC:4821]	protein_coding;nonsense_mediated_decay;retained_intron;processed_transcript	NA	R_HSA_4839726(Chromatin_organization);R_HSA_3214847(HATs_acetylate_histones);R_HSA_3247509(Chromatin_modifying_enzymes)	10.9523	9.81927	13.891	3.50587	4.17389	3.60295	3.07218	1.61926	1.14283e-19	1.98744e-17	up	yes
ENSG00000107331	ABCA2	229127;229117;229116;229114;229124;229126;229112;229122;229119;229118;229130;229123;229113;229129;229121;229125	ENST00000492260;ENST00000459850;ENST00000479446;ENST00000371605;ENST00000431584;ENST00000466707;ENST00000341511;ENST00000463603;ENST00000464520;ENST00000487109;ENST00000464876;ENST00000437791;ENST00000265662;ENST00000467624;ENST00000464157;ENST00000488535	GO:0000166(nucleotide binding);GO:0005319(lipid transporter activity);GO:0005524(ATP binding);GO:0005764(lysosome);GO:0005765(lysosomal membrane);GO:0005768(endosome);GO:0005815(microtubule organizing center);GO:0005886(plasma membrane);GO:0006357(regulation of transcription by RNA polymerase II);GO:0006629(lipid metabolic process);GO:0006869(lipid transport);GO:0007626(locomotory behavior);GO:00…	02010(ABC transporters);04142(Lysosome);04142(Lysosome)	NA	NA	ATP binding cassette subfamily A member 2 [Source:HGNC Symbol;Acc:HGNC:32]	retained_intron;nonsense_mediated_decay;protein_coding;processed_transcript	DOID:1307(dementia);DOID:4(disease);DOID:1289(neurodegenerative_disease);DOID:10652(Alzheimer's_disease);DOID:680(tauopathy);DOID:863(nervous_system_disease);DOID:331(central_nervous_system_disease);DOID:1561(cognitive_disorder);DOID:150(disease_of_mental_health);DOID:7(disease_of_anatomical_entity)	R_HSA_382556(ABC_family_proteins_mediated_transport);R_HSA_382551(Transport_of_small_molecules);R_HSA_1369062(ABC_transporters_in_lipid_homeostasis)	2.45693	2.38915	2.12941	6.74342	6.81205	4.87052	0.378568	-1.40138	1.29203e-19	2.23578e-17	down	yes
ENSG00000175832	ETV4	101489;101491;101496;101488;101492;101493;101487;101490;101494;101495	ENST00000319349;ENST00000545089;ENST00000587151;ENST00000393664;ENST00000591713;ENST00000586826;ENST00000538265;ENST00000545954;ENST00000590236;ENST00000585508	GO:0000790(nuclear chromatin);GO:0000978(RNA polymerase II cis-regulatory region sequence-specific DNA binding);GO:0000981(DNA-binding transcription factor activity, RNA polymerase II-specific);GO:0001228(DNA-binding transcription activator activity, RNA polymerase II-specific);GO:0003677(DNA binding);GO:0003700(DNA-binding transcription factor activity);GO:0005515(protein binding);GO:0005634(nuc…	05202(Transcriptional misregulation in cancer);05202(Transcriptional misregulation in cancer)	K15592	NA	ETS variant transcription factor 4 [Source:HGNC Symbol;Acc:HGNC:3493]	protein_coding;retained_intron	DOID:2394(ovarian_cancer);DOID:0050687(cell_type_cancer);DOID:4(disease);DOID:1749(squamous_cell_carcinoma);DOID:2994(germ_cell_cancer);DOID:4440(seminoma);DOID:162(cancer);DOID:1909(melanoma);DOID:2151(malignant_ovarian_surface_epithelial_stromal_neoplasm);DOID:14566(disease_of_cellular_proliferation);DOID:120(female_reproductive_organ_cancer);DOID:4001(ovarian_carcinoma);DOID:2152(ovary_epithel…	R_HSA_5683057(MAPK_family_signaling_cascades);R_HSA_5687128(MAPK6/MAPK4_signaling);R_HSA_162582(Signal_Transduction)	8.49354	8.31523	7.414	21.2412	21.8653	17.502	0.39966	-1.32315	1.77873e-19	3.06284e-17	down	yes
ENSG00000115275	MOGS	131630;131627;131625;131631;131634;131629;131633;131640;131637;131643;131636;131632;131628;131635;131639;131638;131626	ENST00000649075;ENST00000462189;ENST00000448666;ENST00000649854;ENST00000647723;ENST00000462443;ENST00000648810;ENST00000650523;ENST00000648768;ENST00000486036;ENST00000452063;ENST00000647915;ENST00000649601;ENST00000647771;ENST00000647753;ENST00000649777;ENST00000409065	GO:0003824(catalytic activity);GO:0004573(mannosyl-oligosaccharide glucosidase activity);GO:0005783(endoplasmic reticulum);GO:0005789(endoplasmic reticulum membrane);GO:0006457(protein folding);GO:0006487(protein N-linked glycosylation);GO:0008152(metabolic process);GO:0009311(oligosaccharide metabolic process);GO:0015926(glucosidase activity);GO:0016020(membrane);GO:0016021(integral component of…	00510(N-Glycan biosynthesis);04141(Protein processing in endoplasmic reticulum);04141(Protein processing in endoplasmic reticulum)	K01228	EC:3.2.1.106	mannosyl-oligosaccharide glucosidase [Source:HGNC Symbol;Acc:HGNC:24862]	protein_coding;retained_intron;nonsense_mediated_decay	NA	R_HSA_446203(Asparagine_N_linked_glycosylation);R_HSA_3781865(Diseases_of_glycosylation);R_HSA_9694516(SARS_CoV_2_Infection);R_HSA_597592(Post_translational_protein_modification);R_HSA_532668(N_glycan_trimming_in_the_ER_and_Calnexin/Calreticulin_cycle);R_HSA_5668914(Diseases_of_metabolism);R_HSA_9683686(Maturation_of_spike_protein);R_HSA_9683701(Translation_of_structural_proteins);R_HSA_9679506(S…	5.73799	6.38694	6.85939	19.5528	18.2935	14.0195	0.366028	-1.44997	1.97936e-19	3.39159e-17	down	yes
ENSG00000070404	FSTL3	112625;112627;112631;112628;112630;112626;112629	ENST00000166139;ENST00000589185;ENST00000605925;ENST00000592947;ENST00000591573;ENST00000592058;ENST00000588773	GO:0001503(ossification);GO:0001822(kidney development);GO:0001968(fibronectin binding);GO:0002244(hematopoietic progenitor cell differentiation);GO:0005515(protein binding);GO:0005576(extracellular region);GO:0005615(extracellular space);GO:0005634(nucleus);GO:0005654(nucleoplasm);GO:0005788(endoplasmic reticulum lumen);GO:0005794(Golgi apparatus);GO:0006357(regulation of transcription by RNA po…	NA	NA	NA	follistatin like 3 [Source:HGNC Symbol;Acc:HGNC:3973]	protein_coding;processed_transcript	DOID:1612(breast_cancer);DOID:6000(congestive_heart_failure);DOID:225(syndrome);DOID:4(disease);DOID:4195(hyperglycemia);DOID:4194(glucose_metabolism_disease);DOID:0014667(disease_of_metabolism);DOID:114(heart_disease);DOID:162(cancer);DOID:289(endometriosis);DOID:14566(disease_of_cellular_proliferation);DOID:5093(thoracic_cancer);DOID:11714(gestational_diabetes);DOID:1287(cardiovascular_system_d…	R_HSA_597592(Post_translational_protein_modification);R_HSA_1502540(Signaling_by_Activin);R_HSA_2473224(Antagonism_of_Activin_by_Follistatin);R_HSA_9006936(Signaling_by_TGFB_family_members);R_HSA_162582(Signal_Transduction);R_HSA_392499(Metabolism_of_proteins);R_HSA_381426(Regulation_of_Insulin_like_Growth_Factor_(IGF)_transport_and_uptake_by_Insulin_like_Growth_Factor_Binding_Proteins_(IGFBPs));…	15.7644	19.1225	18.8186	49.1736	48.1953	41.951	0.385484	-1.37526	2.03473e-19	3.46946e-17	down	yes
ENSG00000167110	GOLGA2	227743;227744;227755;227753;227756;227747;227752;227750;227749;227754;227751;227748	ENST00000421699;ENST00000611957;ENST00000458730;ENST00000490257;ENST00000490628;ENST00000462089;ENST00000450617;ENST00000461031;ENST00000486411;ENST00000468488;ENST00000470630;ENST00000496221	GO:0000137(Golgi cis cisterna);GO:0000139(Golgi membrane);GO:0000922(spindle pole);GO:0005515(protein binding);GO:0005737(cytoplasm);GO:0005794(Golgi apparatus);GO:0005801(cis-Golgi network);GO:0005856(cytoskeleton);GO:0005874(microtubule);GO:0006486(protein glycosylation);GO:0006888(endoplasmic reticulum to Golgi vesicle-mediated transport);GO:0007020(microtubule nucleation);GO:0007030(Golgi org…	NA	K20358	NA	golgin A2 [Source:HGNC Symbol;Acc:HGNC:4425]	protein_coding;retained_intron	NA	R_HSA_446203(Asparagine_N_linked_glycosylation);R_HSA_9645723(Diseases_of_programmed_cell_death);R_HSA_8863678(Neurodegenerative_Diseases);R_HSA_597592(Post_translational_protein_modification);R_HSA_5653656(Vesicle_mediated_transport);R_HSA_68886(M_Phase);R_HSA_199991(Membrane_Trafficking);R_HSA_8862803(Deregulated_CDK5_triggers_multiple_neurodegenerative_pathways_in_Alzheimer's_disease_models);R…	6.07601	7.89977	5.52522	21.5496	20.8168	16.1129	0.333469	-1.58438	2.13898e-19	3.62952e-17	down	yes
ENSG00000126603	GLIS2	85383;85382	ENST00000433375;ENST00000262366	GO:0000122(negative regulation of transcription by RNA polymerase II);GO:0000976(transcription regulatory region sequence-specific DNA binding);GO:0000977(RNA polymerase II regulatory region sequence-specific DNA binding);GO:0000981(DNA-binding transcription factor activity, RNA polymerase II-specific);GO:0001228(DNA-binding transcription activator activity, RNA polymerase II-specific);GO:0001822…	NA	K09233	NA	GLIS family zinc finger 2 [Source:HGNC Symbol;Acc:HGNC:29450]	protein_coding	NA	NA	2.31416	3.182	4.7504	15.7922	14.7897	11.5581	0.243155	-2.04005	2.35515e-19	3.97702e-17	down	yes
ENSG00000085185	BCORL1	5391;5392;5389;5388;5387;5390	ENST00000456822;ENST00000441294;ENST00000218147;ENST00000488135;ENST00000607874;ENST00000540052	GO:0005515(protein binding);GO:0005634(nucleus);GO:0005654(nucleoplasm);GO:0005886(plasma membrane);GO:0006325(chromatin organization);GO:0006325(chromatin organization)	NA	NA	NA	BCL6 corepressor like 1 [Source:HGNC Symbol;Acc:HGNC:25657]	protein_coding;nonsense_mediated_decay	DOID:4(disease);DOID:162(cancer);DOID:14566(disease_of_cellular_proliferation)	NA	0.990527	1.09337	1.47682	4.52194	4.4677	3.20417	0.292011	-1.77591	2.37699e-19	3.9946e-17	down	yes
ENSG00000064309	CDON	49052;49059;49053;49056;49057;49055;49058	ENST00000392693;ENST00000527967;ENST00000531738;ENST00000531830;ENST00000525625;ENST00000534661;ENST00000531586	GO:0001708(cell fate specification);GO:0001934(positive regulation of protein phosphorylation);GO:0002088(lens development in camera-type eye);GO:0005515(protein binding);GO:0005886(plasma membrane);GO:0005887(integral component of plasma membrane);GO:0007155(cell adhesion);GO:0007224(smoothened signaling pathway);GO:0007520(myoblast fusion);GO:0009952(anterior/posterior pattern specification);GO…	04340(Hedgehog signaling pathway);04340(Hedgehog signaling pathway)	K20033	NA	cell adhesion associated, oncogene regulated [Source:HGNC Symbol;Acc:HGNC:17104]	protein_coding;nonsense_mediated_decay;retained_intron	DOID:0080015(physical_disorder);DOID:4621(holoprosencephaly);DOID:4(disease);DOID:2490(congenital_nervous_system_abnormality)	R_HSA_5635838(Activation_of_SMO);R_HSA_5632684(Hedgehog_'on'_state);R_HSA_5632681(Ligand_receptor_interactions);R_HSA_525793(Myogenesis);R_HSA_1266738(Developmental_Biology);R_HSA_5358351(Signaling_by_Hedgehog);R_HSA_162582(Signal_Transduction)	1.10398	1.16887	1.11445	3.27282	3.52865	2.5485	0.36228	-1.46482	2.46904e-19	4.12944e-17	down	yes
ENSG00000160888	IER2	116081;116082;116080	ENST00000587885;ENST00000588173;ENST00000292433	GO:0000977(RNA polymerase II regulatory region sequence-specific DNA binding);GO:0001228(DNA-binding transcription activator activity, RNA polymerase II-specific);GO:0003677(DNA binding);GO:0005515(protein binding);GO:0005634(nucleus);GO:0005654(nucleoplasm);GO:0005737(cytoplasm);GO:0030182(neuron differentiation);GO:0045944(positive regulation of transcription by RNA polymerase II);GO:0048870(ce…	NA	NA	NA	immediate early response 2 [Source:HGNC Symbol;Acc:HGNC:28871]	protein_coding	NA	NA	7.03737	6.20403	7.66504	21.2132	19.9615	15.0635	0.371748	-1.4276	2.63689e-19	4.37035e-17	down	yes
ENSG00000111674	ENO2	50650;50644;50647;50653;50649;50646;50642;50643;50652;50648;50640;50651;50641	ENST00000441285;ENST00000229277;ENST00000542509;ENST00000534977;ENST00000535366;ENST00000539713;ENST00000537838;ENST00000536199;ENST00000543975;ENST00000545045;ENST00000537688;ENST00000535275;ENST00000541477	GO:0000015(phosphopyruvate hydratase complex);GO:0000287(magnesium ion binding);GO:0001917(photoreceptor inner segment);GO:0004634(phosphopyruvate hydratase activity);GO:0005515(protein binding);GO:0005615(extracellular space);GO:0005737(cytoplasm);GO:0005829(cytosol);GO:0005886(plasma membrane);GO:0006094(gluconeogenesis);GO:0006096(glycolytic process);GO:0016020(membrane);GO:0016829(lyase activ…	00010(Glycolysis / Gluconeogenesis);03018(RNA degradation);04066(HIF-1 signaling pathway);04066(HIF-1 signaling pathway)	K01689	EC:4.2.1.11	enolase 2 [Source:HGNC Symbol;Acc:HGNC:3353]	retained_intron;protein_coding;processed_transcript;nonsense_mediated_decay	DOID:1307(dementia);DOID:1240(leukemia);DOID:2531(hematologic_cancer);DOID:936(brain_disease);DOID:1037(lymphoblastic_leukemia);DOID:0050117(disease_by_infectious_agent);DOID:4(disease);DOID:5419(schizophrenia);DOID:1192(peripheral_nervous_system_neoplasm);DOID:1289(neurodegenerative_disease);DOID:4194(glucose_metabolism_disease);DOID:10310(viral_meningitis);DOID:0014667(disease_of_metabolism);DO…	R_HSA_71387(Metabolism_of_carbohydrates);R_HSA_70326(Glucose_metabolism);R_HSA_70171(Glycolysis);R_HSA_70263(Gluconeogenesis);R_HSA_1430728(Metabolism)	7.70971	8.00001	7.43812	20.4549	19.9615	16.241	0.408558	-1.29139	2.63809e-19	4.37035e-17	down	yes
ENSG00000101337	TM9SF4	144906;144909;144908;144913;144907;144912;144910	ENST00000398022;ENST00000217315;ENST00000450829;ENST00000479591;ENST00000442842;ENST00000495749;ENST00000417389	GO:0001666(response to hypoxia);GO:0005515(protein binding);GO:0005768(endosome);GO:0005769(early endosome);GO:0005794(Golgi apparatus);GO:0006909(phagocytosis);GO:0007155(cell adhesion);GO:0016020(membrane);GO:0016021(integral component of membrane);GO:0051453(regulation of intracellular pH);GO:0070072(vacuolar proton-transporting V-type ATPase complex assembly);GO:0070863(positive regulation of…	NA	K17086	NA	transmembrane 9 superfamily member 4 [Source:HGNC Symbol;Acc:HGNC:30797]	protein_coding;nonsense_mediated_decay;retained_intron	NA	NA	6.25222	7.60902	7.50048	20.6065	20.1674	15.9419	0.376645	-1.40872	2.73928e-19	4.51659e-17	down	yes
ENSG00000124067	SLC12A4	91502;91505;91513;91512;91508;91516;91506;91519;91510;91520;91517;91507;91515;91511;91514	ENST00000316341;ENST00000541864;ENST00000572476;ENST00000576513;ENST00000537830;ENST00000573702;ENST00000570802;ENST00000572010;ENST00000575857;ENST00000576462;ENST00000576377;ENST00000576616;ENST00000572766;ENST00000573023;ENST00000574665	GO:0005515(protein binding);GO:0005765(lysosomal membrane);GO:0005886(plasma membrane);GO:0005887(integral component of plasma membrane);GO:0006811(ion transport);GO:0006813(potassium ion transport);GO:0006884(cell volume homeostasis);GO:0007268(chemical synaptic transmission);GO:0008519(ammonium transmembrane transporter activity);GO:0015293(symporter activity);GO:0015377(cation:chloride symport…	NA	K14427	NA	solute carrier family 12 member 4 [Source:HGNC Symbol;Acc:HGNC:10913]	protein_coding;retained_intron;processed_transcript;nonsense_mediated_decay	DOID:4(disease);DOID:162(cancer);DOID:14566(disease_of_cellular_proliferation)	R_HSA_382551(Transport_of_small_molecules);R_HSA_426117(Cation_coupled_Chloride_cotransporters);R_HSA_425407(SLC_mediated_transmembrane_transport);R_HSA_425393(Transport_of_inorganic_cations/anions_and_amino_acids/oligopeptides)	1.78615	2.47373	2.14712	7.31301	7.43281	5.19329	0.321329	-1.63788	3.26168e-19	5.35268e-17	down	yes
ENSG00000281453	TGFB2-OT1	25922	ENST00000625474	NA	NA	NA	NA	TGFB2 overlapping transcript 1 [Source:HGNC Symbol;Acc:HGNC:50629]	lncRNA	NA	NA	0.744195	0.444406	0.498976	4.28068	3.59688	3.72424	0.145458	-2.78132	3.86287e-19	6.29228e-17	down	yes
ENSG00000134070	IRAK2	156929	ENST00000256458	GO:0000166(nucleotide binding);GO:0000187(activation of MAPK activity);GO:0001959(regulation of cytokine-mediated signaling pathway);GO:0002224(toll-like receptor signaling pathway);GO:0002755(MyD88-dependent toll-like receptor signaling pathway);GO:0004672(protein kinase activity);GO:0004674(protein serine/threonine kinase activity);GO:0005515(protein binding);GO:0005524(ATP binding);GO:0005634(…	04722(Neurotrophin signaling pathway);05152(Tuberculosis)	K04731	EC:2.7.11.1	interleukin 1 receptor associated kinase 2 [Source:HGNC Symbol;Acc:HGNC:6113]	protein_coding	NA	R_HSA_450302(activated_TAK1_mediates_p38_MAPK_activation);R_HSA_975138(TRAF6_mediated_induction_of_NFkB_and_MAP_kinases_upon_TLR7/8_or_9_activation);R_HSA_448424(Interleukin_17_signaling);R_HSA_168179(Toll_Like_Receptor_TLR1:TLR2_Cascade);R_HSA_1280215(Cytokine_Signaling_in_Immune_system);R_HSA_166058(MyD88:MAL(TIRAP)_cascade_initiated_on_plasma_membrane);R_HSA_9020702(Interleukin_1_signaling);R_…	9.89432	13.9723	7.73752	44.9229	38.8826	31.8937	0.273158	-1.87219	3.87023e-19	6.29228e-17	down	yes
ENSG00000105321	CCDC9	122572;122574;122573;122575;122576;122571;122577	ENST00000643617;ENST00000599398;ENST00000221922;ENST00000595659;ENST00000596938;ENST00000601154;ENST00000600117	GO:0003723(RNA binding);GO:0005515(protein binding);GO:0005515(protein binding)	NA	NA	NA	coiled-coil domain containing 9 [Source:HGNC Symbol;Acc:HGNC:24560]	protein_coding;processed_transcript;retained_intron	NA	NA	1.99144	2.17389	2.74977	8.99593	7.34847	6.53922	0.302186	-1.72649	3.8998e-19	6.31099e-17	down	yes
ENSG00000204262	COL5A2	138443;138444;138446;138445	ENST00000374866;ENST00000618828;ENST00000649966;ENST00000470524	GO:0001501(skeletal system development);GO:0001503(ossification);GO:0005201(extracellular matrix structural constituent);GO:0005515(protein binding);GO:0005576(extracellular region);GO:0005581(collagen trimer);GO:0005588(collagen type V trimer);GO:0005615(extracellular space);GO:0005788(endoplasmic reticulum lumen);GO:0030020(extracellular matrix structural constituent conferring tensile strength…	04974(Protein digestion and absorption);04974(Protein digestion and absorption)	NA	NA	collagen type V alpha 2 chain [Source:HGNC Symbol;Acc:HGNC:2210]	protein_coding;retained_intron	DOID:17(musculoskeletal_system_disease);DOID:225(syndrome);DOID:4(disease);DOID:854(collagen_disease);DOID:65(connective_tissue_disease);DOID:13359(Ehlers_Danlos_syndrome);DOID:7(disease_of_anatomical_entity)	R_HSA_375165(NCAM_signaling_for_neurite_out_growth);R_HSA_1474290(Collagen_formation);R_HSA_1442490(Collagen_degradation);R_HSA_1474244(Extracellular_matrix_organization);R_HSA_1650814(Collagen_biosynthesis_and_modifying_enzymes);R_HSA_3000178(ECM_proteoglycans);R_HSA_6806834(Signaling_by_MET);R_HSA_1266738(Developmental_Biology);R_HSA_8948216(Collagen_chain_trimerization);R_HSA_162582(Signal_Tra…	23.4605	26.0469	30.8678	72.8145	75.2272	59.0314	0.388149	-1.36532	4.40336e-19	7.09306e-17	down	yes
ENSG00000033327	GAB2	45546;45549;45550;45553;45552;45551	ENST00000361507;ENST00000528329;ENST00000526030;ENST00000534823;ENST00000530915;ENST00000528886	GO:0005068(transmembrane receptor protein tyrosine kinase adaptor activity);GO:0005515(protein binding);GO:0005547(phosphatidylinositol-3,4,5-trisphosphate binding);GO:0005737(cytoplasm);GO:0005829(cytosol);GO:0005886(plasma membrane);GO:0007169(transmembrane receptor protein tyrosine kinase signaling pathway);GO:0007411(axon guidance);GO:0008284(positive regulation of cell population proliferati…	04014(Ras signaling pathway);04071(Sphingolipid signaling pathway);04072(Phospholipase D signaling pathway);04380(Osteoclast differentiation);04664(Fc epsilon RI signaling pathway);04666(Fc gamma R-mediated phagocytosis);05220(Chronic myeloid leukemia);05220(Chronic myeloid leukemia)	K08091	NA	GRB2 associated binding protein 2 [Source:HGNC Symbol;Acc:HGNC:14458]	protein_coding;processed_transcript;retained_intron	DOID:1307(dementia);DOID:2394(ovarian_cancer);DOID:1240(leukemia);DOID:2531(hematologic_cancer);DOID:225(syndrome);DOID:0050687(cell_type_cancer);DOID:4(disease);DOID:1289(neurodegenerative_disease);DOID:9538(multiple_myeloma);DOID:162(cancer);DOID:1909(melanoma);DOID:10652(Alzheimer's_disease);DOID:680(tauopathy);DOID:863(nervous_system_disease);DOID:2151(malignant_ovarian_surface_epithelial_str…	R_HSA_512988(Interleukin_3,_Interleukin_5_and_GM_CSF_signaling);R_HSA_2730905(Role_of_LAT2/NTAL/LAB_on_calcium_mobilization);R_HSA_112399(IRS_mediated_signalling);R_HSA_109704(PI3K_Cascade);R_HSA_9006925(Intracellular_signaling_by_second_messengers);R_HSA_8983432(Interleukin_15_signaling);R_HSA_9703465(Signaling_by_FLT3_fusion_proteins);R_HSA_1280215(Cytokine_Signaling_in_Immune_system);R_HSA_199…	1.78124	2.35082	1.73893	6.14572	6.3899	5.58352	0.324021	-1.62584	4.55382e-19	7.30177e-17	down	yes
ENSG00000278771	RN7SL3	69454	ENST00000610674	NA	NA	NA	NA	RNA component of signal recognition particle 7SL3 [Source:HGNC Symbol;Acc:HGNC:23135]	misc_RNA	NA	NA	24.7964	7.97817	9.39665	0.843005	0.76743	0.49638	20.0166	4.32312	4.5844e-19	7.31725e-17	up	yes
ENSG00000198732	SMOC1	71181;71182;71184;71185	ENST00000361956;ENST00000381280;ENST00000553839;ENST00000557483	GO:0001654(eye development);GO:0005509(calcium ion binding);GO:0005515(protein binding);GO:0005576(extracellular region);GO:0005604(basement membrane);GO:0007275(multicellular organism development);GO:0030154(cell differentiation);GO:0045667(regulation of osteoblast differentiation);GO:0046872(metal ion binding);GO:0050840(extracellular matrix binding);GO:0060173(limb development);GO:0060173(limb…	NA	NA	NA	SPARC related modular calcium binding 1 [Source:HGNC Symbol;Acc:HGNC:20318]	protein_coding;retained_intron	NA	NA	6.21502	8.17677	4.82399	22.5316	23.2587	18.6733	0.298087	-1.74619	5.10549e-19	8.11192e-17	down	yes
ENSG00000100154	TTC28	153072;153073;153074;153092;153078;153075;153086	ENST00000612946;ENST00000397906;ENST00000431039;ENST00000468807;ENST00000469670;ENST00000480563;ENST00000442232	GO:0000922(spindle pole);GO:0005515(protein binding);GO:0005737(cytoplasm);GO:0005815(microtubule organizing center);GO:0005819(spindle);GO:0005856(cytoskeleton);GO:0007049(cell cycle);GO:0007346(regulation of mitotic cell cycle);GO:0019900(kinase binding);GO:0030496(midbody);GO:0051301(cell division);GO:0051301(cell division)	NA	NA	NA	tetratricopeptide repeat domain 28 [Source:HGNC Symbol;Acc:HGNC:29179]	protein_coding;retained_intron	NA	NA	0.990502	1.09615	1.2239	3.19099	3.35474	2.59962	0.361993	-1.46597	6.77765e-19	1.072e-16	down	yes
ENSG00000163975	MELTF	170259;170257;170268;170266;170264;170267;170265	ENST00000296350;ENST00000469783;ENST00000473501;ENST00000439320;ENST00000296351;ENST00000491399;ENST00000489445	GO:0005506(iron ion binding);GO:0005515(protein binding);GO:0005576(extracellular region);GO:0005615(extracellular space);GO:0005788(endoplasmic reticulum lumen);GO:0005886(plasma membrane);GO:0006811(ion transport);GO:0006826(iron ion transport);GO:0009986(cell surface);GO:0010756(positive regulation of plasminogen activation);GO:0016020(membrane);GO:0031225(anchored component of membrane);GO:00…	NA	K06569	NA	melanotransferrin [Source:HGNC Symbol;Acc:HGNC:7037]	protein_coding;retained_intron	DOID:1307(dementia);DOID:0050687(cell_type_cancer);DOID:4(disease);DOID:1289(neurodegenerative_disease);DOID:162(cancer);DOID:1909(melanoma);DOID:10652(Alzheimer's_disease);DOID:680(tauopathy);DOID:863(nervous_system_disease);DOID:14566(disease_of_cellular_proliferation);DOID:331(central_nervous_system_disease);DOID:1561(cognitive_disorder);DOID:0060072(benign_neoplasm);DOID:3314(angiomyolipoma);…	R_HSA_597592(Post_translational_protein_modification);R_HSA_163125(Post_translational_modification:_synthesis_of_GPI_anchored_proteins);R_HSA_392499(Metabolism_of_proteins);R_HSA_381426(Regulation_of_Insulin_like_Growth_Factor_(IGF)_transport_and_uptake_by_Insulin_like_Growth_Factor_Binding_Proteins_(IGFBPs));R_HSA_8957275(Post_translational_protein_phosphorylation)	2.65625	3.01915	2.9628	9.32157	8.80193	6.0435	0.357437	-1.48424	7.25387e-19	1.14216e-16	down	yes
ENSG00000140443	IGF1R	83129;83128;83145;83141;83142;83133;83135;83136;83144;83132;83140;83148;83130;83147;83146;83138;83143	ENST00000650285;ENST00000649865;ENST00000561049;ENST00000560432;ENST00000558947;ENST00000557938;ENST00000560186;ENST00000560277;ENST00000560144;ENST00000558355;ENST00000558898;ENST00000558751;ENST00000559925;ENST00000560972;ENST00000560343;ENST00000557873;ENST00000559582	GO:0000166(nucleotide binding);GO:0004672(protein kinase activity);GO:0004713(protein tyrosine kinase activity);GO:0004714(transmembrane receptor protein tyrosine kinase activity);GO:0005009(insulin-activated receptor activity);GO:0005010(insulin-like growth factor-activated receptor activity);GO:0005158(insulin receptor binding);GO:0005515(protein binding);GO:0005520(insulin-like growth factor b…	01521(EGFR tyrosine kinase inhibitor resistance);01522(Endocrine resistance);04010(MAPK signaling pathway);04014(Ras signaling pathway);04015(Rap1 signaling pathway);04066(HIF-1 signaling pathway);04068(FoxO signaling pathway);04114(Oocyte meiosis);04140(Autophagy - animal);04144(Endocytosis);04150(mTOR signaling pathway);04151(PI3K-Akt signaling pathway);04152(AMPK signaling pathway);04211(Longe…	K05087	EC:2.7.10.1	insulin like growth factor 1 receptor [Source:HGNC Symbol;Acc:HGNC:5465]	protein_coding;retained_intron;processed_transcript;nonsense_mediated_decay	DOID:0080001(bone_disease);DOID:684(hepatocellular_carcinoma);DOID:3996(urinary_system_cancer);DOID:5223(infertility);DOID:10286(prostate_carcinoma);DOID:1240(leukemia);DOID:1612(breast_cancer);DOID:9119(acute_myeloid_leukemia);DOID:2531(hematologic_cancer);DOID:28(endocrine_system_disease);DOID:2978(carbohydrate_metabolic_disorder);DOID:1324(lung_cancer);DOID:5577(gastrinoma);DOID:654(overnutrit…	R_HSA_9006931(Signaling_by_Nuclear_Receptors);R_HSA_9009391(Extra_nuclear_estrogen_signaling);R_HSA_2404192(Signaling_by_Type_1_Insulin_like_Growth_Factor_1_Receptor_(IGF1R));R_HSA_162582(Signal_Transduction);R_HSA_2428924(IGF1R_signaling_cascade);R_HSA_2428933(SHC_related_events_triggered_by_IGF1R);R_HSA_8939211(ESR_mediated_signaling);R_HSA_2428928(IRS_related_events_triggered_by_IGF1R);R_HSA_9…	9.03344	8.80802	8.43476	22.6524	23.1662	16.5017	0.421632	-1.24594	7.45119e-19	1.16797e-16	down	yes
ENSG00000177666	PNPLA2	36439;36440;36442;36443;36441;36445	ENST00000336615;ENST00000525250;ENST00000531923;ENST00000529255;ENST00000534561;ENST00000526083	GO:0004806(triglyceride lipase activity);GO:0005654(nucleoplasm);GO:0005737(cytoplasm);GO:0005788(endoplasmic reticulum lumen);GO:0005789(endoplasmic reticulum membrane);GO:0005811(lipid droplet);GO:0005829(cytosol);GO:0005886(plasma membrane);GO:0006629(lipid metabolic process);GO:0006651(diacylglycerol biosynthetic process);GO:0010891(negative regulation of sequestering of triglyceride);GO:0010…	00561(Glycerolipid metabolism);04714(Thermogenesis);04923(Regulation of lipolysis in adipocytes);04923(Regulation of lipolysis in adipocytes)	K16816	EC:3.1.1.3	patatin like phospholipase domain containing 2 [Source:HGNC Symbol;Acc:HGNC:30802]	protein_coding;retained_intron	DOID:28(endocrine_system_disease);DOID:654(overnutrition);DOID:17(musculoskeletal_system_disease);DOID:225(syndrome);DOID:4(disease);DOID:3146(lipid_metabolism_disorder);DOID:9455(lipid_storage_disease);DOID:4194(glucose_metabolism_disease);DOID:0014667(disease_of_metabolism);DOID:1168(familial_hyperlipidemia);DOID:423(myopathy);DOID:26(pancreas_disease);DOID:162(cancer);DOID:2018(hyperinsulinism…	R_HSA_597592(Post_translational_protein_modification);R_HSA_1482883(Acyl_chain_remodeling_of_DAG_and_TAG);R_HSA_1483206(Glycerophospholipid_biosynthesis);R_HSA_392499(Metabolism_of_proteins);R_HSA_381426(Regulation_of_Insulin_like_Growth_Factor_(IGF)_transport_and_uptake_by_Insulin_like_Growth_Factor_Binding_Proteins_(IGFBPs));R_HSA_8957275(Post_translational_protein_phosphorylation);R_HSA_556833…	6.99968	9.56472	5.29521	31.443	28.6516	20.7253	0.270473	-1.88644	7.49814e-19	1.17008e-16	down	yes
ENSG00000197355	UAP1L1	229160;229157;229158;229159	ENST00000474787;ENST00000409858;ENST00000476184;ENST00000360271	GO:0003977(UDP-N-acetylglucosamine diphosphorylase activity);GO:0006048(UDP-N-acetylglucosamine biosynthetic process);GO:0016740(transferase activity);GO:0016779(nucleotidyltransferase activity);GO:0070569(uridylyltransferase activity);GO:0070569(uridylyltransferase activity)	00520(Amino sugar and nucleotide sugar metabolism);00520(Amino sugar and nucleotide sugar metabolism)	K00972	2.7.7.83;EC:2.7.7.23	UDP-N-acetylglucosamine pyrophosphorylase 1 like 1 [Source:HGNC Symbol;Acc:HGNC:28082]	retained_intron;protein_coding;nonsense_mediated_decay	NA	NA	1.40034	1.4972	1.51111	5.20627	4.49126	3.6361	0.330641	-1.59666	7.69016e-19	1.19471e-16	down	yes
ENSG00000067141	NEO1	80264;80268;80263;80275;80276;80265;80266;80273;80267	ENST00000261908;ENST00000560328;ENST00000339362;ENST00000560808;ENST00000558886;ENST00000558964;ENST00000560262;ENST00000558807;ENST00000558485	GO:0005515(protein binding);GO:0005654(nucleoplasm);GO:0005794(Golgi apparatus);GO:0005886(plasma membrane);GO:0005887(integral component of plasma membrane);GO:0007155(cell adhesion);GO:0007399(nervous system development);GO:0007411(axon guidance);GO:0016020(membrane);GO:0016021(integral component of membrane);GO:0030513(positive regulation of BMP signaling pathway);GO:0038023(signaling receptor…	04350(TGF-beta signaling pathway);04360(Axon guidance);04514(Cell adhesion molecules (CAMs));04514(Cell adhesion molecules (CAMs))	K06766	NA	neogenin 1 [Source:HGNC Symbol;Acc:HGNC:7754]	protein_coding;retained_intron	DOID:4(disease);DOID:162(cancer);DOID:14566(disease_of_cellular_proliferation)	R_HSA_525793(Myogenesis);R_HSA_1266738(Developmental_Biology);R_HSA_373752(Netrin_1_signaling);R_HSA_9675108(Nervous_system_development);R_HSA_422475(Axon_guidance)	5.40225	6.26964	8.13298	22.0096	21.281	15.8919	0.334641	-1.57932	7.81682e-19	1.20901e-16	down	yes
ENSG00000177380	PPFIA3	123128;123125;123121;123126;123130;123123;123122;123127;123129;123118	ENST00000602897;ENST00000602726;ENST00000602351;ENST00000602848;ENST00000602783;ENST00000602716;ENST00000602492;ENST00000602800;ENST00000602905;ENST00000334186	GO:0001669(acrosomal vesicle);GO:0005515(protein binding);GO:0005737(cytoplasm);GO:0005829(cytosol);GO:0007269(neurotransmitter secretion);GO:0014047(glutamate secretion);GO:0031410(cytoplasmic vesicle);GO:0045202(synapse);GO:0048172(regulation of short-term neuronal synaptic plasticity);GO:0048786(presynaptic active zone);GO:0050808(synapse organization);GO:0098875(epididymosome);GO:0098875(epid…	NA	NA	NA	PTPRF interacting protein alpha 3 [Source:HGNC Symbol;Acc:HGNC:9247]	protein_coding;retained_intron	NA	R_HSA_212676(Dopamine_Neurotransmitter_Release_Cycle);R_HSA_181429(Serotonin_Neurotransmitter_Release_Cycle);R_HSA_388844(Receptor_type_tyrosine_protein_phosphatases);R_HSA_6794362(Protein_protein_interactions_at_synapses);R_HSA_181430(Norepinephrine_Neurotransmitter_Release_Cycle);R_HSA_210500(Glutamate_Neurotransmitter_Release_Cycle);R_HSA_112315(Transmission_across_Chemical_Synapses);R_HSA_112…	1.26522	1.06272	0.691686	4.1865	4.33615	3.24037	0.256705	-1.96182	7.98982e-19	1.23033e-16	down	yes
ENSG00000166188	ZNF319	90487;90488	ENST00000299237;ENST00000562909	GO:0003676(nucleic acid binding);GO:0003677(DNA binding);GO:0005515(protein binding);GO:0005634(nucleus);GO:0046872(metal ion binding);GO:0046872(metal ion binding)	NA	NA	NA	zinc finger protein 319 [Source:HGNC Symbol;Acc:HGNC:13644]	protein_coding	NA	NA	2.27426	2.814	2.032	9.23372	7.85718	6.27362	0.304747	-1.71432	8.17696e-19	1.25362e-16	down	yes
ENSG00000090006	LTBP4	120905;120887;120891;120896;120894;120888;120906;120892;120904;120918;120913;120910;120922;120885;120909;120897;120890;120884;120901;120889;120919;120907;120895;120903;120902;120914;120908;120916;120917;120911;120912;120899;120898;120900;120920;120915;120893	ENST00000595118;ENST00000308370;ENST00000396819;ENST00000598055;ENST00000546155;ENST00000594537;ENST00000622565;ENST00000595529;ENST00000602251;ENST00000594116;ENST00000617753;ENST00000601464;ENST00000598166;ENST00000204005;ENST00000318809;ENST00000601032;ENST00000593738;ENST00000600026;ENST00000612845;ENST00000598717;ENST00000598178;ENST00000618486;ENST00000598256;ENST00000597071;ENST00000599724…	GO:0001558(regulation of cell growth);GO:0005024(transforming growth factor beta-activated receptor activity);GO:0005178(integrin binding);GO:0005201(extracellular matrix structural constituent);GO:0005509(calcium ion binding);GO:0005515(protein binding);GO:0005539(glycosaminoglycan binding);GO:0005576(extracellular region);GO:0005615(extracellular space);GO:0006457(protein folding);GO:0007179(tr…	NA	NA	NA	latent transforming growth factor beta binding protein 4 [Source:HGNC Symbol;Acc:HGNC:6717]	retained_intron;protein_coding;processed_transcript;nonsense_mediated_decay	DOID:225(syndrome);DOID:4(disease);DOID:0050828(artery_disease);DOID:3627(aortic_aneurysm);DOID:520(aortic_disease);DOID:1287(cardiovascular_system_disease);DOID:178(vascular_disease);DOID:7693(abdominal_aortic_aneurysm);DOID:7(disease_of_anatomical_entity)	R_HSA_1474244(Extracellular_matrix_organization);R_HSA_1566948(Elastic_fibre_formation);R_HSA_2129379(Molecules_associated_with_elastic_fibres)	6.69477	7.45718	4.84212	24.2941	22.1971	15.1617	0.308081	-1.69862	9.37988e-19	1.43176e-16	down	yes
ENSG00000101460	MAP1LC3A	145168;145170;145169;145167	ENST00000360668;ENST00000476428;ENST00000397709;ENST00000374837	GO:0000045(autophagosome assembly);GO:0000421(autophagosome membrane);GO:0000422(autophagy of mitochondrion);GO:0005515(protein binding);GO:0005543(phospholipid binding);GO:0005737(cytoplasm);GO:0005770(late endosome);GO:0005776(autophagosome);GO:0005829(cytosol);GO:0005856(cytoskeleton);GO:0005874(microtubule);GO:0006914(autophagy);GO:0006995(cellular response to nitrogen starvation);GO:0008017(…	04216(Ferroptosis);04216(Ferroptosis)	K10435	NA	microtubule associated protein 1 light chain 3 alpha [Source:HGNC Symbol;Acc:HGNC:6838]	protein_coding;processed_transcript	NA	R_HSA_8934903(Receptor_Mediated_Mitophagy);R_HSA_5205685(PINK1_PRKN_Mediated_Mitophagy);R_HSA_9612973(Autophagy);R_HSA_1632852(Macroautophagy);R_HSA_5205647(Mitophagy);R_HSA_9663891(Selective_autophagy)	3.17599	3.81912	2.44962	13.2838	13.4627	10.3614	0.25452	-1.97415	9.76094e-19	1.48345e-16	down	yes
ENSG00000103089	FA2H	92552;92553;92554;92551;92555	ENST00000219368;ENST00000567683;ENST00000569949;ENST00000562145;ENST00000618933	GO:0001949(sebaceous gland cell differentiation);GO:0005506(iron ion binding);GO:0005515(protein binding);GO:0005783(endoplasmic reticulum);GO:0005789(endoplasmic reticulum membrane);GO:0006629(lipid metabolic process);GO:0006631(fatty acid metabolic process);GO:0006633(fatty acid biosynthetic process);GO:0006665(sphingolipid metabolic process);GO:0006679(glucosylceramide biosynthetic process);GO…	NA	K19703	EC:1.14.18.6	fatty acid 2-hydroxylase [Source:HGNC Symbol;Acc:HGNC:21197]	protein_coding;nonsense_mediated_decay;retained_intron	DOID:936(brain_disease);DOID:4(disease);DOID:10579(leukodystrophy);DOID:1443(cerebral_degeneration);DOID:607(paraplegia);DOID:863(nervous_system_disease);DOID:480(movement_disease);DOID:543(dystonia);DOID:331(central_nervous_system_disease);DOID:7(disease_of_anatomical_entity)	R_HSA_428157(Sphingolipid_metabolism);R_HSA_1660661(Sphingolipid_de_novo_biosynthesis);R_HSA_556833(Metabolism_of_lipids);R_HSA_1430728(Metabolism)	3.06202	4.87682	2.89137	15.348	14.0991	11.4062	0.2651	-1.91539	1.05152e-18	1.59116e-16	down	yes
ENSG00000125657	TNFSF9	114261	ENST00000245817	GO:0005102(signaling receptor binding);GO:0005125(cytokine activity);GO:0005164(tumor necrosis factor receptor binding);GO:0005515(protein binding);GO:0005615(extracellular space);GO:0005886(plasma membrane);GO:0006955(immune response);GO:0007165(signal transduction);GO:0007267(cell-cell signaling);GO:0016020(membrane);GO:0016021(integral component of membrane);GO:0032813(tumor necrosis factor re…	04060(Cytokine-cytokine receptor interaction)	K05472	NA	TNF superfamily member 9 [Source:HGNC Symbol;Acc:HGNC:11939]	protein_coding	DOID:0080001(bone_disease);DOID:1240(leukemia);DOID:934(viral_infectious_disease);DOID:2531(hematologic_cancer);DOID:17(musculoskeletal_system_disease);DOID:5082(liver_cirrhosis);DOID:0050117(disease_by_infectious_agent);DOID:4(disease);DOID:409(liver_disease);DOID:77(gastrointestinal_system_disease);DOID:9538(multiple_myeloma);DOID:417(hypersensitivity_reaction_type_II_disease);DOID:848(arthriti…	R_HSA_1280215(Cytokine_Signaling_in_Immune_system);R_HSA_5668541(TNFR2_non_canonical_NF_kB_pathway);R_HSA_168256(Immune_System);R_HSA_5669034(TNFs_bind_their_physiological_receptors)	5.28149	6.00645	3.04353	24.3975	19.8979	16.7354	0.234824	-2.09035	1.05776e-18	1.59371e-16	down	yes
ENSG00000099194	SCD	33916	ENST00000370355	GO:0004768(stearoyl-CoA 9-desaturase activity);GO:0005506(iron ion binding);GO:0005515(protein binding);GO:0005730(nucleolus);GO:0005783(endoplasmic reticulum);GO:0005789(endoplasmic reticulum membrane);GO:0006629(lipid metabolic process);GO:0006631(fatty acid metabolic process);GO:0006633(fatty acid biosynthetic process);GO:0006636(unsaturated fatty acid biosynthetic process);GO:0016020(membrane…	01040(Biosynthesis of unsaturated fatty acids);03320(PPAR signaling pathway);04152(AMPK signaling pathway)	K00507	EC:1.14.19.1	stearoyl-CoA desaturase [Source:HGNC Symbol;Acc:HGNC:10571]	protein_coding	DOID:10286(prostate_carcinoma);DOID:1324(lung_cancer);DOID:654(overnutrition);DOID:630(genetic_disease);DOID:225(syndrome);DOID:11981(morbid_obesity);DOID:4(disease);DOID:0050177(monogenic_disease);DOID:0050828(artery_disease);DOID:2349(arteriosclerosis);DOID:3146(lipid_metabolism_disorder);DOID:9455(lipid_storage_disease);DOID:4194(glucose_metabolism_disease);DOID:3856(male_reproductive_organ_ca…	R_HSA_9006931(Signaling_by_Nuclear_Receptors);R_HSA_8957322(Metabolism_of_steroids);R_HSA_75105(Fatty_acyl_CoA_biosynthesis);R_HSA_9024446(NR1H2_and_NR1H3_mediated_signaling);R_HSA_8978868(Fatty_acid_metabolism);R_HSA_1655829(Regulation_of_cholesterol_biosynthesis_by_SREBP_(SREBF));R_HSA_2426168(Activation_of_gene_expression_by_SREBF_(SREBP));R_HSA_162582(Signal_Transduction);R_HSA_556833(Metabol…	54.5809	53.4971	95.8603	271.839	249.69	201.344	0.282122	-1.82561	1.2784e-18	1.91787e-16	down	yes
ENSG00000141905	NFIC	113495;113492;113493;113488;113491;113490;113489;113496;113497;113498	ENST00000588839;ENST00000590282;ENST00000443272;ENST00000589123;ENST00000341919;ENST00000586919;ENST00000395111;ENST00000589537;ENST00000589164;ENST00000589969	GO:0000122(negative regulation of transcription by RNA polymerase II);GO:0000790(nuclear chromatin);GO:0000978(RNA polymerase II cis-regulatory region sequence-specific DNA binding);GO:0000981(DNA-binding transcription factor activity, RNA polymerase II-specific);GO:0000987(cis-regulatory region sequence-specific DNA binding);GO:0001228(DNA-binding transcription activator activity, RNA polymerase…	NA	K09170	NA	nuclear factor I C [Source:HGNC Symbol;Acc:HGNC:7786]	processed_transcript;protein_coding;retained_intron	DOID:225(syndrome);DOID:4(disease);DOID:162(cancer);DOID:14566(disease_of_cellular_proliferation);DOID:11612(polycystic_ovary_syndrome)	R_HSA_74160(Gene_expression_(Transcription));R_HSA_73980(RNA_Polymerase_III_Transcription_Termination);R_HSA_749476(RNA_Polymerase_III_Abortive_And_Retractive_Initiation);R_HSA_74158(RNA_Polymerase_III_Transcription)	1.60459	2.03621	2.58839	7.00463	6.90206	5.90596	0.314404	-1.66931	1.4636e-18	2.18633e-16	down	yes
ENSG00000177606	JUN	15167	ENST00000371222	GO:0000122(negative regulation of transcription by RNA polymerase II);GO:0000228(nuclear chromosome);GO:0000790(nuclear chromatin);GO:0000976(transcription regulatory region sequence-specific DNA binding);GO:0000978(RNA polymerase II cis-regulatory region sequence-specific DNA binding);GO:0000981(DNA-binding transcription factor activity, RNA polymerase II-specific);GO:0001102(RNA polymerase II a…	01522(Endocrine resistance);04010(MAPK signaling pathway);04012(ErbB signaling pathway);04024(cAMP signaling pathway);04137(Mitophagy - animal);04210(Apoptosis);04310(Wnt signaling pathway);04380(Osteoclast differentiation);04510(Focal adhesion);04530(Tight junction);04620(Toll-like receptor signaling pathway);04621(NOD-like receptor signaling pathway);04625(C-type lectin receptor signaling pathw…	K04448	NA	Jun proto-oncogene, AP-1 transcription factor subunit [Source:HGNC Symbol;Acc:HGNC:6204]	protein_coding	DOID:18(urinary_system_disease);DOID:0080001(bone_disease);DOID:684(hepatocellular_carcinoma);DOID:3382(liposarcoma);DOID:1240(leukemia);DOID:934(viral_infectious_disease);DOID:1612(breast_cancer);DOID:2531(hematologic_cancer);DOID:17(musculoskeletal_system_disease);DOID:225(syndrome);DOID:0050687(cell_type_cancer);DOID:3571(liver_cancer);DOID:0050117(disease_by_infectious_agent);DOID:4(disease);…	R_HSA_212436(Generic_Transcription_Pathway);R_HSA_2262752(Cellular_responses_to_stress);R_HSA_2559582(Senescence_Associated_Secretory_Phenotype_(SASP));R_HSA_6796648(TP53_Regulates_Transcription_of_DNA_Repair_Genes);R_HSA_975138(TRAF6_mediated_induction_of_NFkB_and_MAP_kinases_upon_TLR7/8_or_9_activation);R_HSA_9645723(Diseases_of_programmed_cell_death);R_HSA_8863678(Neurodegenerative_Diseases);R…	6.45242	8.27222	6.31022	22.5366	21.1329	16.733	0.348245	-1.52183	1.66694e-18	2.47948e-16	down	yes
ENSG00000183963	SMTN	153600;153616;153609;153602;153614;153598;153613;153605;153612;153594;153596;153607;153610;153597;153592;153611;153608;153599;153606;153595;153615;153601;153593;153604	ENST00000333137;ENST00000504335;ENST00000460658;ENST00000489337;ENST00000624247;ENST00000497697;ENST00000493335;ENST00000619644;ENST00000404574;ENST00000426927;ENST00000440425;ENST00000416786;ENST00000466272;ENST00000475548;ENST00000432777;ENST00000455608;ENST00000431481;ENST00000358743;ENST00000612341;ENST00000482444;ENST00000472911;ENST00000347557;ENST00000422839;ENST00000438223	GO:0003085(negative regulation of systemic arterial blood pressure);GO:0003779(actin binding);GO:0005515(protein binding);GO:0005737(cytoplasm);GO:0005815(microtubule organizing center);GO:0005856(cytoskeleton);GO:0006939(smooth muscle contraction);GO:0007517(muscle organ development);GO:0008307(structural constituent of muscle);GO:0015629(actin cytoskeleton);GO:0017137(Rab GTPase binding);GO:003…	NA	NA	NA	smoothelin [Source:HGNC Symbol;Acc:HGNC:11126]	protein_coding;retained_intron;processed_transcript	DOID:3996(urinary_system_cancer);DOID:4(disease);DOID:162(cancer);DOID:4007(bladder_carcinoma);DOID:14566(disease_of_cellular_proliferation);DOID:11054(urinary_bladder_cancer);DOID:0050686(organ_system_cancer)	NA	1.02403	1.25898	1.03336	3.96216	3.36032	2.75212	0.329182	-1.60304	1.83515e-18	2.70981e-16	down	yes
ENSG00000105429	MEGF8	121413;121417;121412;121418;121415;121411	ENST00000251268;ENST00000593647;ENST00000378073;ENST00000599787;ENST00000593840;ENST00000334370	GO:0003143(embryonic heart tube morphogenesis);GO:0005509(calcium ion binding);GO:0005515(protein binding);GO:0005634(nucleus);GO:0007368(determination of left/right symmetry);GO:0009887(animal organ morphogenesis);GO:0009888(tissue development);GO:0010468(regulation of gene expression);GO:0016020(membrane);GO:0016021(integral component of membrane);GO:0030326(embryonic limb morphogenesis);GO:003…	NA	NA	NA	multiple EGF like domains 8 [Source:HGNC Symbol;Acc:HGNC:3233]	protein_coding;retained_intron	DOID:4(disease);DOID:162(cancer);DOID:14566(disease_of_cellular_proliferation)	NA	2.81245	2.16367	4.26242	11.8029	12.1631	9.11764	0.279248	-1.84038	1.84242e-18	2.70981e-16	down	yes
ENSG00000167930	FAM234A	83588;83583;83593;83599;83587;83600;83584;83591;83585;83598;83592;83597;83602;83589;83595;83582;83601;83594	ENST00000399932;ENST00000666018;ENST00000449945;ENST00000496874;ENST00000419173;ENST00000421000;ENST00000301679;ENST00000447499;ENST00000654053;ENST00000600536;ENST00000453430;ENST00000417499;ENST00000424016;ENST00000426695;ENST00000301678;ENST00000653392;ENST00000468354;ENST00000420046	GO:0003674(molecular_function);GO:0008150(biological_process);GO:0009986(cell surface);GO:0016020(membrane);GO:0016021(integral component of membrane);GO:0070062(extracellular exosome);GO:0070062(extracellular exosome)	NA	K17258	NA	family with sequence similarity 234 member A [Source:HGNC Symbol;Acc:HGNC:14163]	protein_coding;nonsense_mediated_decay;retained_intron	NA	NA	5.8924	5.77539	5.70089	14.9604	14.9463	11.3679	0.420808	-1.24877	1.84504e-18	2.70981e-16	down	yes
ENSG00000130529	TRPM4	123139;123138;123141;123140;123145;123143;123135;123144;123137;123147;123148;123136;123142	ENST00000595519;ENST00000252826;ENST00000596338;ENST00000427978;ENST00000595071;ENST00000594568;ENST00000598691;ENST00000601347;ENST00000599628;ENST00000599459;ENST00000597316;ENST00000598697;ENST00000598502	GO:0000166(nucleotide binding);GO:0002250(adaptive immune response);GO:0002376(immune system process);GO:0002407(dendritic cell chemotaxis);GO:0002724(regulation of T cell cytokine production);GO:0005216(ion channel activity);GO:0005227(calcium activated cation channel activity);GO:0005262(calcium channel activity);GO:0005509(calcium ion binding);GO:0005516(calmodulin binding);GO:0005524(ATP bind…	04911(Insulin secretion);04911(Insulin secretion)	K04979	NA	transient receptor potential cation channel subfamily M member 4 [Source:HGNC Symbol;Acc:HGNC:17993]	nonsense_mediated_decay;protein_coding;retained_intron;processed_transcript	DOID:4(disease);DOID:162(cancer);DOID:14566(disease_of_cellular_proliferation)	R_HSA_382551(Transport_of_small_molecules);R_HSA_3295583(TRP_channels);R_HSA_2672351(Stimuli_sensing_channels);R_HSA_983712(Ion_channel_transport)	1.09431	1.45144	1.50627	4.58254	4.93803	3.52563	0.31059	-1.68692	1.96855e-18	2.87911e-16	down	yes
ENSG00000144597	EAF1	157446;157445	ENST00000396842;ENST00000449565	GO:0005515(protein binding);GO:0005634(nucleus);GO:0005654(nucleoplasm);GO:0006355(regulation of transcription, DNA-templated);GO:0006366(transcription by RNA polymerase II);GO:0006368(transcription elongation from RNA polymerase II promoter);GO:0008023(transcription elongation factor complex);GO:0015030(Cajal body);GO:0016604(nuclear body);GO:0016607(nuclear speck);GO:0032783(super elongation co…	NA	K15186	NA	ELL associated factor 1 [Source:HGNC Symbol;Acc:HGNC:20907]	protein_coding;nonsense_mediated_decay	NA	R_HSA_112382(Formation_of_RNA_Pol_II_elongation_complex);R_HSA_74160(Gene_expression_(Transcription));R_HSA_73857(RNA_Polymerase_II_Transcription);R_HSA_674695(RNA_Polymerase_II_Pre_transcription_Events);R_HSA_75955(RNA_Polymerase_II_Transcription_Elongation)	5.56079	5.77525	5.52875	14.2585	14.7195	11.5459	0.416169	-1.26476	2.08668e-18	3.03558e-16	down	yes
ENSG00000156453	PCDH1	187721;187723;187727;187724	ENST00000287008;ENST00000394536;ENST00000505937;ENST00000511044	GO:0005509(calcium ion binding);GO:0005654(nucleoplasm);GO:0005730(nucleolus);GO:0005886(plasma membrane);GO:0005887(integral component of plasma membrane);GO:0005911(cell-cell junction);GO:0007155(cell adhesion);GO:0007156(homophilic cell adhesion via plasma membrane adhesion molecules);GO:0007267(cell-cell signaling);GO:0007399(nervous system development);GO:0016020(membrane);GO:0016021(integra…	NA	K16498	NA	protocadherin 1 [Source:HGNC Symbol;Acc:HGNC:8655]	protein_coding;nonsense_mediated_decay;processed_transcript	NA	NA	0.216342	0.321144	0.183588	1.50995	1.40701	1.09551	0.179708	-2.47627	2.09291e-18	3.03558e-16	down	yes
ENSG00000108828	VAT1	101343;101347;101348;101344;101346;101349;101345	ENST00000355653;ENST00000590924;ENST00000589709;ENST00000587173;ENST00000587147;ENST00000589828;ENST00000420567	GO:0005515(protein binding);GO:0005576(extracellular region);GO:0005737(cytoplasm);GO:0005739(mitochondrion);GO:0005741(mitochondrial outer membrane);GO:0008270(zinc ion binding);GO:0010637(negative regulation of mitochondrial fusion);GO:0016020(membrane);GO:0016021(integral component of membrane);GO:0016491(oxidoreductase activity);GO:0035578(azurophil granule lumen);GO:0043312(neutrophil degran…	NA	K23167	NA	vesicle amine transport 1 [Source:HGNC Symbol;Acc:HGNC:16919]	protein_coding	NA	R_HSA_168249(Innate_Immune_System);R_HSA_168256(Immune_System);R_HSA_6798695(Neutrophil_degranulation)	49.6976	53.369	43.4624	135.573	128.997	99.2682	0.402731	-1.31211	2.22628e-18	3.21568e-16	down	yes
ENSG00000071553	ATP6AP1	6878;6876;6881;6879;6877;6883;6885;6884	ENST00000369762;ENST00000422890;ENST00000455205;ENST00000439372;ENST00000449556;ENST00000491569;ENST00000484908;ENST00000619046	GO:0000166(nucleotide binding);GO:0005515(protein binding);GO:0005524(ATP binding);GO:0005783(endoplasmic reticulum);GO:0005789(endoplasmic reticulum membrane);GO:0006811(ion transport);GO:0006879(cellular iron ion homeostasis);GO:0008286(insulin receptor signaling pathway);GO:0010008(endosome membrane);GO:0016020(membrane);GO:0016021(integral component of membrane);GO:0016469(proton-transporting…	00190(Oxidative phosphorylation);04142(Lysosome);04145(Phagosome);05110(Vibrio cholerae infection);05120(Epithelial cell signaling in Helicobacter pylori infection);05152(Tuberculosis);05161(Hepatitis B);05165(Human papillomavirus infection);05323(Rheumatoid arthritis);05323(Rheumatoid arthritis)	NA	NA	ATPase H+ transporting accessory protein 1 [Source:HGNC Symbol;Acc:HGNC:868]	protein_coding;nonsense_mediated_decay;retained_intron;processed_transcript	NA	R_HSA_194315(Signaling_by_Rho_GTPases);R_HSA_9012999(RHO_GTPase_cycle);R_HSA_382551(Transport_of_small_molecules);R_HSA_917937(Iron_uptake_and_transport);R_HSA_74752(Signaling_by_Insulin_receptor);R_HSA_9716542(Signaling_by_Rho_GTPases,_Miro_GTPases_and_RHOBTB3);R_HSA_77387(Insulin_receptor_recycling);R_HSA_162582(Signal_Transduction);R_HSA_917977(Transferrin_endocytosis_and_recycling);R_HSA_8980…	7.18997	7.10466	8.9382	21.463	21.8713	16.5487	0.387971	-1.36598	2.38894e-18	3.43644e-16	down	yes
ENSG00000233016	SNHG7	228963;228965;228966;228960;228961;228962;228964	ENST00000653276;ENST00000416970;ENST00000447221;ENST00000414282;ENST00000436596;ENST00000663097;ENST00000668354	NA	NA	NA	NA	small nucleolar RNA host gene 7 [Source:HGNC Symbol;Acc:HGNC:28254]	lncRNA	NA	NA	6.07821	6.18984	4.55681	17.1821	15.4126	15.1517	0.352379	-1.5048	2.58481e-18	3.70296e-16	down	yes
ENSG00000164970	FAM219A	223108;223111;223113;223112;223117;223115;223109;223114;223116	ENST00000379080;ENST00000379087;ENST00000651358;ENST00000379089;ENST00000379078;ENST00000297620;ENST00000379081;ENST00000445726;ENST00000422409	NA	NA	NA	NA	family with sequence similarity 219 member A [Source:HGNC Symbol;Acc:HGNC:19920]	protein_coding	NA	NA	4.13932	3.91099	4.02911	10.4153	10.6738	9.01325	0.401279	-1.31732	2.6776e-18	3.82022e-16	down	yes
ENSG00000172548	NIPAL4	188855;188854;188856	ENST00000311946;ENST00000435489;ENST00000521390	GO:0005515(protein binding);GO:0006811(ion transport);GO:0015095(magnesium ion transmembrane transporter activity);GO:0015693(magnesium ion transport);GO:0016020(membrane);GO:0016021(integral component of membrane);GO:1903830(magnesium ion transmembrane transport);GO:1903830(magnesium ion transmembrane transport)	NA	K22733	NA	NIPA like domain containing 4 [Source:HGNC Symbol;Acc:HGNC:28018]	protein_coding;processed_transcript	NA	R_HSA_382551(Transport_of_small_molecules);R_HSA_5223345(Miscellaneous_transport_and_binding_events)	1.11494	1.2893	0.933056	4.33074	3.80375	3.52481	0.286234	-1.80473	2.70232e-18	3.83983e-16	down	yes
ENSG00000121753	ADGRB2	12024;12023;12025;12031;12020;12021;12017;12030;12019;12027;12018;12029;12026;12022	ENST00000527361;ENST00000530999;ENST00000398538;ENST00000436464;ENST00000398542;ENST00000465256;ENST00000398556;ENST00000468430;ENST00000373655;ENST00000420125;ENST00000398547;ENST00000533175;ENST00000466109;ENST00000373658	GO:0004888(transmembrane signaling receptor activity);GO:0004930(G protein-coupled receptor activity);GO:0005515(protein binding);GO:0005813(centrosome);GO:0005886(plasma membrane);GO:0005887(integral component of plasma membrane);GO:0007165(signal transduction);GO:0007166(cell surface receptor signaling pathway);GO:0007186(G protein-coupled receptor signaling pathway);GO:0007189(adenylate cyclas…	NA	NA	NA	adhesion G protein-coupled receptor B2 [Source:HGNC Symbol;Acc:HGNC:944]	protein_coding;retained_intron;processed_transcript	DOID:4(disease);DOID:1287(cardiovascular_system_disease);DOID:178(vascular_disease);DOID:326(ischemia);DOID:7(disease_of_anatomical_entity)	NA	1.34554	1.48875	1.67989	4.41506	5.27642	3.53742	0.341236	-1.55116	3.06406e-18	4.3362e-16	down	yes
ENSG00000111676	ATN1	50655;50654;50657;50656	ENST00000396684;ENST00000356654;ENST00000537488;ENST00000541029	GO:0000122(negative regulation of transcription by RNA polymerase II);GO:0001085(RNA polymerase II transcription factor binding);GO:0003677(DNA binding);GO:0003714(transcription corepressor activity);GO:0005515(protein binding);GO:0005634(nucleus);GO:0005654(nucleoplasm);GO:0005737(cytoplasm);GO:0007417(central nervous system development);GO:0016363(nuclear matrix);GO:0019904(protein domain speci…	NA	K05626	NA	atrophin 1 [Source:HGNC Symbol;Acc:HGNC:3033]	protein_coding;retained_intron	DOID:936(brain_disease);DOID:4(disease);DOID:1289(neurodegenerative_disease);DOID:1440(Machado_Joseph_disease);DOID:1824(status_epilepticus);DOID:863(nervous_system_disease);DOID:12858(Huntington's_disease);DOID:1441(spinocerebellar_ataxia);DOID:331(central_nervous_system_disease);DOID:1826(epilepsy_syndrome);DOID:2478(spinocerebellar_degeneration);DOID:7(disease_of_anatomical_entity)	R_HSA_9006925(Intracellular_signaling_by_second_messengers);R_HSA_6807070(PTEN_Regulation);R_HSA_162582(Signal_Transduction);R_HSA_8943724(Regulation_of_PTEN_gene_transcription);R_HSA_1257604(PIP3_activates_AKT_signaling)	3.53656	4.83453	6.83612	20.8142	19.9329	15.0136	0.272723	-1.87449	3.18806e-18	4.4935e-16	down	yes
ENSG00000111275	ALDH2	59960;59962;59961;59959	ENST00000261733;ENST00000549106;ENST00000548536;ENST00000416293	GO:0004029(aldehyde dehydrogenase (NAD+) activity);GO:0004030(aldehyde dehydrogenase [NAD(P)+] activity);GO:0005739(mitochondrion);GO:0005759(mitochondrial matrix);GO:0005975(carbohydrate metabolic process);GO:0006066(alcohol metabolic process);GO:0006068(ethanol catabolic process);GO:0006069(ethanol oxidation);GO:0009055(electron transfer activity);GO:0016491(oxidoreductase activity);GO:0016620(…	00010(Glycolysis / Gluconeogenesis);00053(Ascorbate and aldarate metabolism);00071(Fatty acid degradation);00280(Valine, leucine and isoleucine degradation);00310(Lysine degradation);00330(Arginine and proline metabolism);00340(Histidine metabolism);00380(Tryptophan metabolism);00410(beta-Alanine metabolism);00561(Glycerolipid metabolism);00620(Pyruvate metabolism);00620(Pyruvate metabolism)	NA	NA	aldehyde dehydrogenase 2 family member [Source:HGNC Symbol;Acc:HGNC:404]	protein_coding;nonsense_mediated_decay	DOID:18(urinary_system_disease);DOID:684(hepatocellular_carcinoma);DOID:1307(dementia);DOID:28(endocrine_system_disease);DOID:4989(pancreatitis);DOID:225(syndrome);DOID:0050687(cell_type_cancer);DOID:1115(sarcoma);DOID:936(brain_disease);DOID:3571(liver_cancer);DOID:574(peripheral_nervous_system_disease);DOID:824(periodontitis);DOID:4(disease);DOID:5419(schizophrenia);DOID:0050828(artery_disease)…	R_HSA_211859(Biological_oxidations);R_HSA_380615(Serotonin_clearance_from_the_synaptic_cleft);R_HSA_71384(Ethanol_oxidation);R_HSA_211945(Phase_I_Functionalization_of_compounds);R_HSA_380612(Metabolism_of_serotonin);R_HSA_112315(Transmission_across_Chemical_Synapses);R_HSA_112311(Neurotransmitter_clearance);R_HSA_112316(Neuronal_System);R_HSA_1430728(Metabolism)	5.407	4.54013	4.2756	12.9505	11.9435	10.1082	0.406338	-1.29925	3.63496e-18	5.10281e-16	down	yes
ENSG00000225697	SLC26A6	159954;159947;159953;159949;159948;159956;159959;159966;159950;159946;159958;159952;159955;159961;159957;159962;159964;159963;159967	ENST00000455886;ENST00000420764;ENST00000480524;ENST00000489483;ENST00000358747;ENST00000462009;ENST00000421649;ENST00000431739;ENST00000307364;ENST00000395550;ENST00000496469;ENST00000337000;ENST00000466257;ENST00000414944;ENST00000469693;ENST00000485361;ENST00000482282;ENST00000494717;ENST00000426599	GO:0005254(chloride channel activity);GO:0005783(endoplasmic reticulum);GO:0005886(plasma membrane);GO:0005887(integral component of plasma membrane);GO:0006811(ion transport);GO:0006820(anion transport);GO:0006821(chloride transport);GO:0008271(secondary active sulfate transmembrane transporter activity);GO:0008272(sulfate transport);GO:0008509(anion transmembrane transporter activity);GO:001250…	04978(Mineral absorption);04978(Mineral absorption)	K14704	NA	solute carrier family 26 member 6 [Source:HGNC Symbol;Acc:HGNC:14472]	protein_coding;retained_intron;nonsense_mediated_decay;processed_transcript	DOID:18(urinary_system_disease);DOID:28(endocrine_system_disease);DOID:4(disease);DOID:11202(primary_hyperparathyroidism);DOID:11201(parathyroid_gland_disease);DOID:557(kidney_disease);DOID:585(nephrolithiasis);DOID:13543(hyperparathyroidism);DOID:7(disease_of_anatomical_entity)	R_HSA_382551(Transport_of_small_molecules);R_HSA_425407(SLC_mediated_transmembrane_transport);R_HSA_427601(Multifunctional_anion_exchangers);R_HSA_425393(Transport_of_inorganic_cations/anions_and_amino_acids/oligopeptides)	1.24289	1.22028	1.38541	4.47286	4.01347	2.98713	0.335433	-1.5759	3.73606e-18	5.22376e-16	down	yes
ENSG00000089327	FXYD5	119176;119179;119174;119173;119175;119182;119181;119177;119184;119178;119172;119183	ENST00000541435;ENST00000342879;ENST00000392219;ENST00000543307;ENST00000592290;ENST00000591716;ENST00000423817;ENST00000590686;ENST00000392217;ENST00000496493;ENST00000392218;ENST00000586925	GO:0003779(actin binding);GO:0005515(protein binding);GO:0006811(ion transport);GO:0016020(membrane);GO:0016021(integral component of membrane);GO:0017080(sodium channel regulator activity);GO:0030033(microvillus assembly);GO:0043269(regulation of ion transport);GO:0045296(cadherin binding);GO:0046588(negative regulation of calcium-dependent cell-cell adhesion);GO:0099106(ion channel regulator ac…	NA	K13362	NA	FXYD domain containing ion transport regulator 5 [Source:HGNC Symbol;Acc:HGNC:4029]	protein_coding;nonsense_mediated_decay;processed_transcript	DOID:630(genetic_disease);DOID:0050687(cell_type_cancer);DOID:4(disease);DOID:0050177(monogenic_disease);DOID:1485(cystic_fibrosis);DOID:0050739(autosomal_genetic_disease);DOID:0050737(autosomal_recessive_disease);DOID:162(cancer);DOID:1909(melanoma);DOID:14566(disease_of_cellular_proliferation)	NA	7.07687	10.4358	8.63588	26.8835	27.0433	23.4762	0.337823	-1.56566	4.21942e-18	5.87609e-16	down	yes
ENSG00000105438	KDELR1	122850;122853;122854;122851;122852	ENST00000330720;ENST00000599084;ENST00000594643;ENST00000597017;ENST00000600980	GO:0000139(Golgi membrane);GO:0002369(T cell cytokine production);GO:0005046(KDEL sequence binding);GO:0005515(protein binding);GO:0005783(endoplasmic reticulum);GO:0005789(endoplasmic reticulum membrane);GO:0005793(endoplasmic reticulum-Golgi intermediate compartment);GO:0005794(Golgi apparatus);GO:0005801(cis-Golgi network);GO:0006621(protein retention in ER lumen);GO:0006888(endoplasmic reticu…	05110(Vibrio cholerae infection);05110(Vibrio cholerae infection)	K10949	NA	KDEL endoplasmic reticulum protein retention receptor 1 [Source:HGNC Symbol;Acc:HGNC:6304]	protein_coding;retained_intron	NA	R_HSA_6811442(Intra_Golgi_and_retrograde_Golgi_to_ER_traffic);R_HSA_446203(Asparagine_N_linked_glycosylation);R_HSA_597592(Post_translational_protein_modification);R_HSA_5653656(Vesicle_mediated_transport);R_HSA_199991(Membrane_Trafficking);R_HSA_199977(ER_to_Golgi_Anterograde_Transport);R_HSA_8856688(Golgi_to_ER_retrograde_transport);R_HSA_948021(Transport_to_the_Golgi_and_subsequent_modificatio…	54.7035	68.1183	73.3844	186.135	181.273	145.131	0.382812	-1.38529	4.33305e-18	6.01038e-16	down	yes
ENSG00000112787	FBRSL1	62137;62138;62143;62136;62140;62144;62141;62145	ENST00000650108;ENST00000542061;ENST00000543453;ENST00000434748;ENST00000539264;ENST00000542306;ENST00000543360;ENST00000537804	GO:0003723(RNA binding);GO:0003723(RNA binding)	NA	NA	NA	fibrosin like 1 [Source:HGNC Symbol;Acc:HGNC:29308]	protein_coding;processed_transcript;retained_intron	NA	NA	1.06415	1.22009	1.44622	4.10448	4.08847	2.95545	0.334619	-1.57941	5.13807e-18	7.09886e-16	down	yes
ENSG00000171105	INSR	114368;114367;114371;114372;114370;114369;114373	ENST00000302850;ENST00000341500;ENST00000597211;ENST00000598216;ENST00000593970;ENST00000601099;ENST00000600492	GO:0000166(nucleotide binding);GO:0000187(activation of MAPK activity);GO:0001540(amyloid-beta binding);GO:0001934(positive regulation of protein phosphorylation);GO:0002092(positive regulation of receptor internalization);GO:0003007(heart morphogenesis);GO:0004672(protein kinase activity);GO:0004713(protein tyrosine kinase activity);GO:0004714(transmembrane receptor protein tyrosine kinase activ…	04010(MAPK signaling pathway);04014(Ras signaling pathway);04015(Rap1 signaling pathway);04022(cGMP-PKG signaling pathway);04066(HIF-1 signaling pathway);04068(FoxO signaling pathway);04072(Phospholipase D signaling pathway);04150(mTOR signaling pathway);04151(PI3K-Akt signaling pathway);04152(AMPK signaling pathway);04211(Longevity regulating pathway);04213(Longevity regulating pathway - multipl…	K04527	EC:2.7.10.1	insulin receptor [Source:HGNC Symbol;Acc:HGNC:6091]	protein_coding;retained_intron	DOID:28(endocrine_system_disease);DOID:2021(placenta_cancer);DOID:654(overnutrition);DOID:17(musculoskeletal_system_disease);DOID:225(syndrome);DOID:936(brain_disease);DOID:4(disease);DOID:418(systemic_scleroderma);DOID:4195(hyperglycemia);DOID:0050828(artery_disease);DOID:10825(essential_hypertension);DOID:450(myotonic_disease);DOID:1923(sex_differentiation_disease);DOID:11613(hyperandrogenism);…	R_HSA_9006925(Intracellular_signaling_by_second_messengers);R_HSA_199418(Negative_regulation_of_the_PI3K/AKT_network);R_HSA_74752(Signaling_by_Insulin_receptor);R_HSA_74713(IRS_activation);R_HSA_74751(Insulin_receptor_signalling_cascade);R_HSA_74749(Signal_attenuation);R_HSA_77387(Insulin_receptor_recycling);R_HSA_162582(Signal_Transduction);R_HSA_6811558(PI5P,_PP2A_and_IER3_Regulate_PI3K/AKT_Sig…	0.817034	0.762394	0.805973	2.58475	2.33789	1.80876	0.354369	-1.49667	5.41991e-18	7.45878e-16	down	yes
ENSG00000156381	ANKRD9	74154;74157;74155;74156;74158	ENST00000286918;ENST00000559404;ENST00000559651;ENST00000560748;ENST00000557902	GO:0005515(protein binding);GO:0005829(cytosol);GO:0043687(post-translational protein modification);GO:0043687(post-translational protein modification)	NA	NA	NA	ankyrin repeat domain 9 [Source:HGNC Symbol;Acc:HGNC:20096]	protein_coding	NA	R_HSA_597592(Post_translational_protein_modification);R_HSA_8951664(Neddylation);R_HSA_392499(Metabolism_of_proteins)	2.19563	1.84787	2.04554	6.25606	5.84392	4.25421	0.372323	-1.42537	5.88452e-18	8.06641e-16	down	yes
ENSG00000169919	GUSB	205343;205350;205356;205349;205346;205345;205344;205355;205348;205351;205354;205352;205353	ENST00000304895;ENST00000465785;ENST00000478118;ENST00000462371;ENST00000430730;ENST00000447929;ENST00000466883;ENST00000446111;ENST00000461622;ENST00000479038;ENST00000476486;ENST00000489482;ENST00000475316	GO:0004553(hydrolase activity, hydrolyzing O-glycosyl compounds);GO:0004566(beta-glucuronidase activity);GO:0005102(signaling receptor binding);GO:0005576(extracellular region);GO:0005615(extracellular space);GO:0005764(lysosome);GO:0005975(carbohydrate metabolic process);GO:0006027(glycosaminoglycan catabolic process);GO:0008152(metabolic process);GO:0016020(membrane);GO:0016787(hydrolase activi…	00040(Pentose and glucuronate interconversions);00531(Glycosaminoglycan degradation);00860(Porphyrin and chlorophyll metabolism);00983(Drug metabolism - other enzymes);04142(Lysosome);04142(Lysosome)	NA	NA	glucuronidase beta [Source:HGNC Symbol;Acc:HGNC:4696]	protein_coding;processed_transcript;retained_intron;nonsense_mediated_decay	DOID:0080001(bone_disease);DOID:17(musculoskeletal_system_disease);DOID:12803(Sly_syndrome);DOID:4(disease);DOID:12798(mucopolysaccharidosis);DOID:409(liver_disease);DOID:77(gastrointestinal_system_disease);DOID:0014667(disease_of_metabolism);DOID:848(arthritis);DOID:162(cancer);DOID:14566(disease_of_cellular_proliferation);DOID:3342(bone_inflammation_disease);DOID:7148(rheumatoid_arthritis);DOID…	R_HSA_2206281(Mucopolysaccharidoses);R_HSA_2160916(Hyaluronan_uptake_and_degradation);R_HSA_5663084(Diseases_of_carbohydrate_metabolism);R_HSA_168249(Innate_Immune_System);R_HSA_71387(Metabolism_of_carbohydrates);R_HSA_5668914(Diseases_of_metabolism);R_HSA_1630316(Glycosaminoglycan_metabolism);R_HSA_168256(Immune_System);R_HSA_2024096(HS_GAG_degradation);R_HSA_6798695(Neutrophil_degranulation);R_…	3.77964	4.38435	4.85075	13.4588	12.4177	10.0239	0.362524	-1.46385	5.94475e-18	8.11713e-16	down	yes
ENSG00000128342	LIF	153347;153348	ENST00000249075;ENST00000403987	GO:0001974(blood vessel remodeling);GO:0005102(signaling receptor binding);GO:0005125(cytokine activity);GO:0005146(leukemia inhibitory factor receptor binding);GO:0005515(protein binding);GO:0005576(extracellular region);GO:0005615(extracellular space);GO:0005829(cytosol);GO:0006955(immune response);GO:0007260(tyrosine phosphorylation of STAT protein);GO:0007275(multicellular organism developmen…	04060(Cytokine-cytokine receptor interaction);04550(Signaling pathways regulating pluripotency of stem cells);04630(Jak-STAT signaling pathway);04668(TNF signaling pathway);04668(TNF signaling pathway)	K05419	NA	LIF interleukin 6 family cytokine [Source:HGNC Symbol;Acc:HGNC:6596]	protein_coding	DOID:5223(infertility);DOID:2394(ovarian_cancer);DOID:1240(leukemia);DOID:10591(pre_eclampsia);DOID:1612(breast_cancer);DOID:2531(hematologic_cancer);DOID:0050687(cell_type_cancer);DOID:4(disease);DOID:0050828(artery_disease);DOID:1192(peripheral_nervous_system_neoplasm);DOID:1781(thyroid_cancer);DOID:2723(dermatitis);DOID:1785(pituitary_cancer);DOID:2994(germ_cell_cancer);DOID:16(integumentary_s…	R_HSA_1280215(Cytokine_Signaling_in_Immune_system);R_HSA_6783783(Interleukin_10_signaling);R_HSA_6783589(Interleukin_6_family_signaling);R_HSA_6788467(IL_6_type_cytokine_receptor_ligand_interactions);R_HSA_168256(Immune_System);R_HSA_6785807(Interleukin_4_and_Interleukin_13_signaling);R_HSA_449147(Signaling_by_Interleukins)	14.1738	14.3632	15.1397	43.5935	35.972	29.5827	0.400159	-1.32135	6.35105e-18	8.63818e-16	down	yes
ENSG00000125505	MBOAT7	124765;124766;124770;124763;124768;124764;124769;124775;124774;124772;124771;124773;124762	ENST00000245615;ENST00000494142;ENST00000414665;ENST00000431666;ENST00000391754;ENST00000338624;ENST00000495279;ENST00000495968;ENST00000491216;ENST00000464098;ENST00000453320;ENST00000474910;ENST00000437868	GO:0003841(1-acylglycerol-3-phosphate O-acyltransferase activity);GO:0005515(protein binding);GO:0005783(endoplasmic reticulum);GO:0005789(endoplasmic reticulum membrane);GO:0006629(lipid metabolic process);GO:0006644(phospholipid metabolic process);GO:0006661(phosphatidylinositol biosynthetic process);GO:0008654(phospholipid biosynthetic process);GO:0016020(membrane);GO:0016021(integral componen…	00564(Glycerophospholipid metabolism);00564(Glycerophospholipid metabolism)	K13516	EC:2.3.1.-	membrane bound O-acyltransferase domain containing 7 [Source:HGNC Symbol;Acc:HGNC:15505]	protein_coding;retained_intron;processed_transcript;nonsense_mediated_decay	NA	R_HSA_1483206(Glycerophospholipid_biosynthesis);R_HSA_556833(Metabolism_of_lipids);R_HSA_1483257(Phospholipid_metabolism);R_HSA_1430728(Metabolism);R_HSA_1482922(Acyl_chain_remodelling_of_PI)	5.00004	6.38224	8.17498	22.5222	21.1435	17.0103	0.322322	-1.63342	6.86467e-18	9.30056e-16	down	yes
ENSG00000142178	SIK1	150667;150669;150672;150671;150668;150670	ENST00000270162;ENST00000644689;ENST00000644276;ENST00000644750;ENST00000644871;ENST00000478426	GO:0000166(nucleotide binding);GO:0000287(magnesium ion binding);GO:0002028(regulation of sodium ion transport);GO:0004672(protein kinase activity);GO:0004674(protein serine/threonine kinase activity);GO:0005515(protein binding);GO:0005524(ATP binding);GO:0005634(nucleus);GO:0005737(cytoplasm);GO:0006468(protein phosphorylation);GO:0007049(cell cycle);GO:0007275(multicellular organism development…	04922(Glucagon signaling pathway);04922(Glucagon signaling pathway)	K19008	EC:2.7.11.1	salt inducible kinase 1 [Source:HGNC Symbol;Acc:HGNC:11142]	protein_coding;retained_intron	NA	R_HSA_400253(Circadian_Clock)	10.3974	13.7519	12.941	34.9163	33.2444	29.7484	0.378824	-1.4004	6.97451e-18	9.4129e-16	down	yes
ENSG00000185650	ZFP36L1	71060;71059;71061;71062;71063;71064	ENST00000439696;ENST00000555997;ENST00000336440;ENST00000557086;ENST00000557022;ENST00000553375	GO:0000165(MAPK cascade);GO:0000288(nuclear-transcribed mRNA catabolic process, deadenylation-dependent decay);GO:0000932(P-body);GO:0000981(DNA-binding transcription factor activity, RNA polymerase II-specific);GO:0001570(vasculogenesis);GO:0003342(proepicardium development);GO:0003677(DNA binding);GO:0003723(RNA binding);GO:0003729(mRNA binding);GO:0005515(protein binding);GO:0005634(nucleus);G…	04218(Cellular senescence);04218(Cellular senescence)	NA	NA	ZFP36 ring finger protein like 1 [Source:HGNC Symbol;Acc:HGNC:1107]	protein_coding	DOID:3996(urinary_system_cancer);DOID:1240(leukemia);DOID:2531(hematologic_cancer);DOID:1037(lymphoblastic_leukemia);DOID:4(disease);DOID:162(cancer);DOID:14566(disease_of_cellular_proliferation);DOID:4450(renal_cell_carcinoma);DOID:1036(chronic_leukemia);DOID:263(kidney_cancer);DOID:0060083(immune_system_cancer);DOID:4451(renal_carcinoma);DOID:1040(chronic_lymphocytic_leukemia);DOID:0050686(orga…	R_HSA_450385(Butyrate_Response_Factor_1_(BRF1)_binds_and_destabilizes_mRNA);R_HSA_450531(Regulation_of_mRNA_stability_by_proteins_that_bind_AU_rich_elements);R_HSA_8953854(Metabolism_of_RNA)	9.47202	15.7152	17.9858	58.3184	50.1912	45.3716	0.280561	-1.83361	7.18433e-18	9.65878e-16	down	yes
ENSG00000203485	INF2	74500;74501;74517;74485;74522;74482;74488;74515;74513;74523;74502;74506;74508;74509;74529;74512;74490;74528;74518;74479;74480;74520;74510;74483;74503;74486;74524;74494;74484;74487;74521;74481;74511;74525;74526;74497;74495;74491	ENST00000674960;ENST00000674991;ENST00000675029;ENST00000330634;ENST00000674631;ENST00000674869;ENST00000398337;ENST00000617571;ENST00000675930;ENST00000480763;ENST00000675583;ENST00000675809;ENST00000675329;ENST00000675980;ENST00000481338;ENST00000675481;ENST00000674966;ENST00000674686;ENST00000676134;ENST00000540171;ENST00000675743;ENST00000252527;ENST00000674662;ENST00000675248;ENST00000675724…	GO:0003779(actin binding);GO:0005737(cytoplasm);GO:0016043(cellular component organization);GO:0017048(Rho GTPase binding);GO:0030036(actin cytoskeleton organization);GO:0048471(perinuclear region of cytoplasm);GO:0090140(regulation of mitochondrial fission);GO:0090140(regulation of mitochondrial fission)	NA	NA	NA	inverted formin 2 [Source:HGNC Symbol;Acc:HGNC:23791]	nonsense_mediated_decay;protein_coding;retained_intron;processed_transcript	NA	NA	4.07303	4.31491	5.46489	13.9203	13.5838	9.79477	0.371401	-1.42895	7.28593e-18	9.75784e-16	down	yes
ENSG00000058085	LAMC2	23737;23736;23738	ENST00000264144;ENST00000493293;ENST00000461729	GO:0005102(signaling receptor binding);GO:0005201(extracellular matrix structural constituent);GO:0005576(extracellular region);GO:0005604(basement membrane);GO:0005607(laminin-2 complex);GO:0005615(extracellular space);GO:0005938(cell cortex);GO:0007155(cell adhesion);GO:0008045(motor neuron axon guidance);GO:0008201(heparin binding);GO:0008284(positive regulation of cell population proliferatio…	04151(PI3K-Akt signaling pathway);04510(Focal adhesion);04512(ECM-receptor interaction);05145(Toxoplasmosis);05146(Amoebiasis);05165(Human papillomavirus infection);05200(Pathways in cancer);05222(Small cell lung cancer);05222(Small cell lung cancer)	K06246	NA	laminin subunit gamma 2 [Source:HGNC Symbol;Acc:HGNC:6493]	protein_coding;processed_transcript	DOID:684(hepatocellular_carcinoma);DOID:2871(endometrial_carcinoma);DOID:0050687(cell_type_cancer);DOID:850(lung_disease);DOID:3571(liver_cancer);DOID:4(disease);DOID:1579(respiratory_system_disease);DOID:1749(squamous_cell_carcinoma);DOID:2730(epidermolysis_bullosa);DOID:3121(gallbladder_cancer);DOID:2994(germ_cell_cancer);DOID:16(integumentary_system_disease);DOID:170(endocrine_gland_cancer);DO…	R_HSA_1474290(Collagen_formation);R_HSA_1474244(Extracellular_matrix_organization);R_HSA_446728(Cell_junction_organization);R_HSA_3000157(Laminin_interactions);R_HSA_6806834(Signaling_by_MET);R_HSA_162582(Signal_Transduction);R_HSA_3000171(Non_integrin_membrane_ECM_interactions);R_HSA_2214320(Anchoring_fibril_formation);R_HSA_2022090(Assembly_of_collagen_fibrils_and_other_multimeric_structures);R…	3.35417	3.34459	3.28631	8.72467	8.33729	6.88185	0.417021	-1.26181	7.57251e-18	1.01023e-15	down	yes
ENSG00000081052	COL4A4	141175;141176	ENST00000396625;ENST00000643379	GO:0005201(extracellular matrix structural constituent);GO:0005576(extracellular region);GO:0005581(collagen trimer);GO:0005587(collagen type IV trimer);GO:0005604(basement membrane);GO:0005615(extracellular space);GO:0005788(endoplasmic reticulum lumen);GO:0030020(extracellular matrix structural constituent conferring tensile strength);GO:0030198(extracellular matrix organization);GO:0031012(ext…	04151(PI3K-Akt signaling pathway);04510(Focal adhesion);04512(ECM-receptor interaction);04926(Relaxin signaling pathway);04933(AGE-RAGE signaling pathway in diabetic complications);04974(Protein digestion and absorption);05146(Amoebiasis);05165(Human papillomavirus infection);05200(Pathways in cancer);05222(Small cell lung cancer);05222(Small cell lung cancer)	NA	NA	collagen type IV alpha 4 chain [Source:HGNC Symbol;Acc:HGNC:2206]	protein_coding	DOID:18(urinary_system_disease);DOID:225(syndrome);DOID:576(proteinuria);DOID:4(disease);DOID:557(kidney_disease);DOID:2921(glomerulonephritis);DOID:0050851(glomerulosclerosis);DOID:863(nervous_system_disease);DOID:1312(focal_segmental_glomerulosclerosis);DOID:1492(eye_and_adnexa_disease);DOID:10952(nephritis);DOID:0050155(sensory_system_disease);DOID:1074(kidney_failure);DOID:5614(eye_disease);D…	R_HSA_375165(NCAM_signaling_for_neurite_out_growth);R_HSA_1474290(Collagen_formation);R_HSA_1442490(Collagen_degradation);R_HSA_1474244(Extracellular_matrix_organization);R_HSA_1650814(Collagen_biosynthesis_and_modifying_enzymes);R_HSA_3000178(ECM_proteoglycans);R_HSA_3000157(Laminin_interactions);R_HSA_1266738(Developmental_Biology);R_HSA_8948216(Collagen_chain_trimerization);R_HSA_162582(Signal…	1.95389	1.97985	1.98199	4.98391	5.45893	4.04788	0.408242	-1.2925	7.60096e-18	1.01023e-15	down	yes
ENSG00000068137	PLEKHH3	101152;101156;101151;101149;101150;101153;101148;101154;101155	ENST00000591490;ENST00000587627;ENST00000456950;ENST00000591196;ENST00000591022;ENST00000293349;ENST00000591476;ENST00000592974;ENST00000591544	GO:0005615(extracellular space);GO:0005856(cytoskeleton);GO:0007165(signal transduction);GO:0007165(signal transduction)	NA	NA	NA	pleckstrin homology, MyTH4 and FERM domain containing H3 [Source:HGNC Symbol;Acc:HGNC:26105]	retained_intron;protein_coding;processed_transcript;nonsense_mediated_decay	NA	NA	2.03822	1.78405	2.42709	7.62202	7.19722	4.78306	0.318807	-1.64924	7.74395e-18	1.02534e-15	down	yes
ENSG00000146242	TPBG	196823;196822;196824	ENST00000369750;ENST00000535040;ENST00000543496	GO:0005515(protein binding);GO:0005737(cytoplasm);GO:0005783(endoplasmic reticulum);GO:0005886(plasma membrane);GO:0005887(integral component of plasma membrane);GO:0007155(cell adhesion);GO:0009986(cell surface);GO:0016020(membrane);GO:0016021(integral component of membrane);GO:0051965(positive regulation of synapse assembly);GO:0051965(positive regulation of synapse assembly)	NA	NA	NA	trophoblast glycoprotein [Source:HGNC Symbol;Acc:HGNC:12004]	protein_coding	DOID:10591(pre_eclampsia);DOID:4(disease);DOID:0050828(artery_disease);DOID:162(cancer);DOID:14566(disease_of_cellular_proliferation);DOID:10763(hypertension);DOID:1287(cardiovascular_system_disease);DOID:178(vascular_disease);DOID:7(disease_of_anatomical_entity)	NA	8.47132	9.56288	9.38657	26.8704	23.2351	19.4735	0.394095	-1.34338	8.29579e-18	1.09426e-15	down	yes
ENSG00000133069	TMCC2	24953;24955;24957;24962	ENST00000358024;ENST00000495538;ENST00000367159;ENST00000330675	GO:0005515(protein binding);GO:0005783(endoplasmic reticulum);GO:0005789(endoplasmic reticulum membrane);GO:0012505(endomembrane system);GO:0016020(membrane);GO:0016021(integral component of membrane);GO:0042982(amyloid precursor protein metabolic process);GO:0042982(amyloid precursor protein metabolic process)	NA	NA	NA	transmembrane and coiled-coil domain family 2 [Source:HGNC Symbol;Acc:HGNC:24239]	protein_coding;processed_transcript	NA	NA	0.592813	0.669391	0.549406	2.25939	2.27376	1.75096	0.288284	-1.79444	8.52704e-18	1.12054e-15	down	yes
ENSG00000090857	PDPR	91922;91925;91927;91933;91932;91926;91923;91931;91924	ENST00000288050;ENST00000568530;ENST00000562100;ENST00000567896;ENST00000564563;ENST00000565186;ENST00000561920;ENST00000567046;ENST00000398122	GO:0005515(protein binding);GO:0005737(cytoplasm);GO:0005739(mitochondrion);GO:0005759(mitochondrial matrix);GO:0010510(regulation of acetyl-CoA biosynthetic process from pyruvate);GO:0016491(oxidoreductase activity);GO:0055114(oxidation-reduction process);GO:0055114(oxidation-reduction process)	NA	K17509	NA	pyruvate dehydrogenase phosphatase regulatory subunit [Source:HGNC Symbol;Acc:HGNC:30264]	protein_coding;processed_transcript;nonsense_mediated_decay;retained_intron	NA	R_HSA_204174(Regulation_of_pyruvate_dehydrogenase_(PDH)_complex);R_HSA_70268(Pyruvate_metabolism);R_HSA_1428517(The_citric_acid_(TCA)_cycle_and_respiratory_electron_transport);R_HSA_71406(Pyruvate_metabolism_and_Citric_Acid_(TCA)_cycle);R_HSA_1430728(Metabolism)	3.86035	3.93882	4.46869	11.3428	12.3786	8.00481	0.386679	-1.37079	8.65616e-18	1.13324e-15	down	yes
ENSG00000197324	LRP10	67461;67462;67463;67464	ENST00000359591;ENST00000546834;ENST00000553002;ENST00000551466	GO:0005041(low-density lipoprotein particle receptor activity);GO:0005515(protein binding);GO:0005905(clathrin-coated pit);GO:0006629(lipid metabolic process);GO:0006869(lipid transport);GO:0006897(endocytosis);GO:0016020(membrane);GO:0016021(integral component of membrane);GO:0048839(inner ear development);GO:0048839(inner ear development)	NA	K20050	NA	LDL receptor related protein 10 [Source:HGNC Symbol;Acc:HGNC:14553]	protein_coding;retained_intron	NA	R_HSA_196854(Metabolism_of_vitamins_and_cofactors);R_HSA_2187338(Visual_phototransduction);R_HSA_9709957(Sensory_Perception);R_HSA_975634(Retinoid_metabolism_and_transport);R_HSA_6806667(Metabolism_of_fat_soluble_vitamins);R_HSA_1430728(Metabolism)	13.7576	15.4517	16.9798	40.4304	40.7583	31.0821	0.411408	-1.28136	9.08418e-18	1.18484e-15	down	yes
ENSG00000007047	MARK4	122051;122044;122048;122049;122050;122045;122052	ENST00000592207;ENST00000262891;ENST00000590909;ENST00000588533;ENST00000588621;ENST00000300843;ENST00000590897	GO:0000082(G1/S transition of mitotic cell cycle);GO:0000086(G2/M transition of mitotic cell cycle);GO:0000166(nucleotide binding);GO:0000226(microtubule cytoskeleton organization);GO:0000930(gamma-tubulin complex);GO:0001578(microtubule bundle formation);GO:0004672(protein kinase activity);GO:0004674(protein serine/threonine kinase activity);GO:0005515(protein binding);GO:0005524(ATP binding);GO…	NA	K08798	EC:2.7.11.1	microtubule affinity regulating kinase 4 [Source:HGNC Symbol;Acc:HGNC:13538]	nonsense_mediated_decay;protein_coding;retained_intron	NA	R_HSA_5620912(Anchoring_of_the_basal_body_to_the_plasma_membrane);R_HSA_1852241(Organelle_biogenesis_and_maintenance);R_HSA_5617833(Cilium_Assembly)	1.34151	2.29362	1.41157	7.08311	6.57164	5.20804	0.267548	-1.90213	9.29794e-18	1.20821e-15	down	yes
ENSG00000146083	RNF44	189825;189826;189830;189827;189829;189832;189828;189831	ENST00000274811;ENST00000506378;ENST00000504160;ENST00000513029;ENST00000508478;ENST00000509404;ENST00000515051;ENST00000504434	GO:0005515(protein binding);GO:0046872(metal ion binding);GO:0046872(metal ion binding)	NA	K19041	EC:2.3.2.27	ring finger protein 44 [Source:HGNC Symbol;Acc:HGNC:19180]	protein_coding;nonsense_mediated_decay;retained_intron;processed_transcript	NA	NA	3.20481	3.69989	3.62277	10.1604	10.5738	7.29983	0.375525	-1.41302	9.55578e-18	1.23712e-15	down	yes
ENSG00000170266	GLB1	158276;158278;158286;158280;158284;158275;158289;158294;158293;158291;158283;158281;158282;158288;158279;158277	ENST00000307363;ENST00000461475;ENST00000490658;ENST00000467571;ENST00000481581;ENST00000399402;ENST00000446732;ENST00000436768;ENST00000450835;ENST00000440656;ENST00000485698;ENST00000473477;ENST00000482097;ENST00000415454;ENST00000497796;ENST00000307377	GO:0004553(hydrolase activity, hydrolyzing O-glycosyl compounds);GO:0004565(beta-galactosidase activity);GO:0005515(protein binding);GO:0005576(extracellular region);GO:0005615(extracellular space);GO:0005737(cytoplasm);GO:0005764(lysosome);GO:0005773(vacuole);GO:0005794(Golgi apparatus);GO:0005975(carbohydrate metabolic process);GO:0006027(glycosaminoglycan catabolic process);GO:0006687(glycosph…	00052(Galactose metabolism);00511(Other glycan degradation);00531(Glycosaminoglycan degradation);00600(Sphingolipid metabolism);00604(Glycosphingolipid biosynthesis - ganglio series);04142(Lysosome);04142(Lysosome)	NA	NA	galactosidase beta 1 [Source:HGNC Symbol;Acc:HGNC:4298]	protein_coding;processed_transcript;nonsense_mediated_decay;retained_intron	DOID:934(viral_infectious_disease);DOID:936(brain_disease);DOID:0050117(disease_by_infectious_agent);DOID:4(disease);DOID:9455(lipid_storage_disease);DOID:1443(cerebral_degeneration);DOID:0014667(disease_of_metabolism);DOID:1927(sphingolipidosis);DOID:863(nervous_system_disease);DOID:526(Human_immunodeficiency_virus_infectious_disease);DOID:2368(gangliosidosis);DOID:331(central_nervous_system_dis…	R_HSA_446203(Asparagine_N_linked_glycosylation);R_HSA_3781865(Diseases_of_glycosylation);R_HSA_597592(Post_translational_protein_modification);R_HSA_2206281(Mucopolysaccharidoses);R_HSA_5663084(Diseases_of_carbohydrate_metabolism);R_HSA_168249(Innate_Immune_System);R_HSA_71387(Metabolism_of_carbohydrates);R_HSA_5609975(Diseases_associated_with_glycosylation_precursor_biosynthesis);R_HSA_5668914(D…	10.0313	11.5347	12.016	29.247	29.8986	23.0445	0.408589	-1.29128	1.10193e-17	1.42133e-15	down	yes
ENSG00000070770	CSNK2A2	90521;90523;90524;90522;90520;90525	ENST00000262506;ENST00000563307;ENST00000562367;ENST00000567730;ENST00000566813;ENST00000565188	GO:0000166(nucleotide binding);GO:0000785(chromatin);GO:0001669(acrosomal vesicle);GO:0004672(protein kinase activity);GO:0004674(protein serine/threonine kinase activity);GO:0005515(protein binding);GO:0005524(ATP binding);GO:0005634(nucleus);GO:0005654(nucleoplasm);GO:0005737(cytoplasm);GO:0005829(cytosol);GO:0005886(plasma membrane);GO:0005956(protein kinase CK2 complex);GO:0006457(protein fol…	03008(Ribosome biogenesis in eukaryotes);04064(NF-kappa B signaling pathway);04137(Mitophagy - animal);04310(Wnt signaling pathway);04520(Adherens junction);05162(Measles);05162(Measles)	NA	NA	casein kinase 2 alpha 2 [Source:HGNC Symbol;Acc:HGNC:2459]	protein_coding;retained_intron;processed_transcript	NA	R_HSA_9707587(Regulation_of_HMOX1_expression_and_activity);R_HSA_212436(Generic_Transcription_Pathway);R_HSA_2262752(Cellular_responses_to_stress);R_HSA_9707564(Cytoprotection_by_HMOX1);R_HSA_201681(TCF_dependent_signaling_in_response_to_WNT);R_HSA_8934903(Receptor_Mediated_Mitophagy);R_HSA_9006925(Intracellular_signaling_by_second_messengers);R_HSA_195721(Signaling_by_WNT);R_HSA_8953897(Cellular…	7.06649	7.21685	7.01418	17.4618	18.4933	13.4477	0.431101	-1.2139	1.16505e-17	1.49722e-15	down	yes
ENSG00000110048	OSBP	41421;41423;41422	ENST00000263847;ENST00000528903;ENST00000525357	GO:0000139(Golgi membrane);GO:0005515(protein binding);GO:0005654(nucleoplasm);GO:0005730(nucleolus);GO:0005737(cytoplasm);GO:0005783(endoplasmic reticulum);GO:0005789(endoplasmic reticulum membrane);GO:0005794(Golgi apparatus);GO:0005802(trans-Golgi network);GO:0005829(cytosol);GO:0005886(plasma membrane);GO:0006699(bile acid biosynthetic process);GO:0006869(lipid transport);GO:0008142(oxysterol…	NA	K20456	NA	oxysterol binding protein [Source:HGNC Symbol;Acc:HGNC:8503]	protein_coding;retained_intron;nonsense_mediated_decay	NA	R_HSA_8957322(Metabolism_of_steroids);R_HSA_194068(Bile_acid_and_bile_salt_metabolism);R_HSA_192105(Synthesis_of_bile_acids_and_bile_salts);R_HSA_428157(Sphingolipid_metabolism);R_HSA_1660661(Sphingolipid_de_novo_biosynthesis);R_HSA_556833(Metabolism_of_lipids);R_HSA_1430728(Metabolism)	8.75493	9.35462	10.3577	25.2252	25.9034	18.6734	0.407829	-1.29396	1.2399e-17	1.58758e-15	down	yes
ENSG00000124145	SDC4	146348	ENST00000372733	GO:0001523(retinoid metabolic process);GO:0001657(ureteric bud development);GO:0001843(neural tube closure);GO:0001968(fibronectin binding);GO:0005080(protein kinase C binding);GO:0005515(protein binding);GO:0005576(extracellular region);GO:0005796(Golgi lumen);GO:0005886(plasma membrane);GO:0005887(integral component of plasma membrane);GO:0005925(focal adhesion);GO:0006024(glycosaminoglycan bio…	04512(ECM-receptor interaction);04514(Cell adhesion molecules (CAMs));05205(Proteoglycans in cancer);05418(Fluid shear stress and atherosclerosis)	K16338	NA	syndecan 4 [Source:HGNC Symbol;Acc:HGNC:10661]	protein_coding	DOID:0080001(bone_disease);DOID:684(hepatocellular_carcinoma);DOID:1612(breast_cancer);DOID:3458(breast_adenocarcinoma);DOID:17(musculoskeletal_system_disease);DOID:225(syndrome);DOID:0050687(cell_type_cancer);DOID:3571(liver_cancer);DOID:4(disease);DOID:848(arthritis);DOID:3459(breast_carcinoma);DOID:162(cancer);DOID:1909(melanoma);DOID:3119(gastrointestinal_system_cancer);DOID:14566(disease_of_…	R_HSA_196854(Metabolism_of_vitamins_and_cofactors);R_HSA_3781865(Diseases_of_glycosylation);R_HSA_1474244(Extracellular_matrix_organization);R_HSA_2187338(Visual_phototransduction);R_HSA_9709957(Sensory_Perception);R_HSA_202733(Cell_surface_interactions_at_the_vascular_wall);R_HSA_71387(Metabolism_of_carbohydrates);R_HSA_1971475(A_tetrasaccharide_linker_sequence_is_required_for_GAG_synthesis);R_H…	15.4262	15.2014	13.5781	37.9771	35.161	31.8672	0.420986	-1.24815	1.29767e-17	1.65548e-15	down	yes
ENSG00000167657	DAPK3	113644;113645;113643;113647;113642;113649;113648	ENST00000595279;ENST00000594894;ENST00000301264;ENST00000596311;ENST00000545797;ENST00000593844;ENST00000601824	GO:0000166(nucleotide binding);GO:0004672(protein kinase activity);GO:0004674(protein serine/threonine kinase activity);GO:0005515(protein binding);GO:0005524(ATP binding);GO:0005634(nucleus);GO:0005654(nucleoplasm);GO:0005737(cytoplasm);GO:0005884(actin filament);GO:0006325(chromatin organization);GO:0006355(regulation of transcription, DNA-templated);GO:0006417(regulation of translation);GO:000…	04140(Autophagy - animal);05200(Pathways in cancer);05219(Bladder cancer);05219(Bladder cancer)	K08803	EC:2.7.11.1	death associated protein kinase 3 [Source:HGNC Symbol;Acc:HGNC:2676]	retained_intron;protein_coding	NA	R_HSA_5357769(Caspase_activation_via_extrinsic_apoptotic_signalling_pathway);R_HSA_418889(Caspase_activation_via_Dependence_Receptors_in_the_absence_of_ligand);R_HSA_109581(Apoptosis);R_HSA_5357801(Programmed_Cell_Death)	4.17165	4.53388	4.17063	13.1495	10.9793	10.0777	0.376424	-1.40957	1.31833e-17	1.67572e-15	down	yes
ENSG00000148339	SLC25A25	227647;227648;227652;227650;227655;227654;227653	ENST00000373068;ENST00000373069;ENST00000373064;ENST00000373066;ENST00000466983;ENST00000445012;ENST00000472769	GO:0002021(response to dietary excess);GO:0005347(ATP transmembrane transporter activity);GO:0005509(calcium ion binding);GO:0005739(mitochondrion);GO:0005743(mitochondrial inner membrane);GO:0014823(response to activity);GO:0015867(ATP transport);GO:0016020(membrane);GO:0016021(integral component of membrane);GO:0032094(response to food);GO:0035264(multicellular organism growth);GO:0043010(camer…	NA	K14684	NA	solute carrier family 25 member 25 [Source:HGNC Symbol;Acc:HGNC:20663]	protein_coding;retained_intron;nonsense_mediated_decay	NA	NA	1.42616	1.50891	1.66145	4.52697	4.46855	4.11361	0.350635	-1.51196	1.33328e-17	1.68858e-15	down	yes
ENSG00000140521	POLG	82205;82206;82213;82208;82224;82203;82211;82204;82231;82225;82209;82221;82223;82212;82228;82210;82214;82218;82202;82217;82207;82227;82230;82222	ENST00000442287;ENST00000530292;ENST00000526671;ENST00000635986;ENST00000526573;ENST00000672695;ENST00000672071;ENST00000268124;ENST00000637711;ENST00000533857;ENST00000672923;ENST00000532584;ENST00000526398;ENST00000637238;ENST00000650303;ENST00000666746;ENST00000636774;ENST00000670281;ENST00000631044;ENST00000530715;ENST00000637264;ENST00000532363;ENST00000636937;ENST00000526314	GO:0002020(protease binding);GO:0003677(DNA binding);GO:0003682(chromatin binding);GO:0003887(DNA-directed DNA polymerase activity);GO:0005515(protein binding);GO:0005739(mitochondrion);GO:0005760(gamma DNA polymerase complex);GO:0006259(DNA metabolic process);GO:0006260(DNA replication);GO:0006261(DNA-dependent DNA replication);GO:0006264(mitochondrial DNA replication);GO:0006287(base-excision r…	NA	K02332	EC:2.7.7.7	DNA polymerase gamma, catalytic subunit [Source:HGNC Symbol;Acc:HGNC:9179]	protein_coding;nonsense_mediated_decay;retained_intron;processed_transcript	DOID:5223(infertility);DOID:3650(lactic_acidosis);DOID:17(musculoskeletal_system_disease);DOID:0060053(peripheral_neuropathy);DOID:225(syndrome);DOID:936(brain_disease);DOID:574(peripheral_nervous_system_disease);DOID:4(disease);DOID:11831(cortical_blindness);DOID:2742(auditory_system_disease);DOID:0050700(cardiomyopathy);DOID:1289(neurodegenerative_disease);DOID:699(mitochondrial_myopathy);DOID:…	NA	4.37452	4.02083	4.31474	11.4569	11.1612	8.08232	0.414004	-1.27228	1.35694e-17	1.71234e-15	down	yes
ENSG00000167281	RBFOX3	106853;106859;106854;106858;106864;106856;106857;106862;106860;106855;106852;106865	ENST00000648001;ENST00000582894;ENST00000582043;ENST00000582880;ENST00000578887;ENST00000580155;ENST00000578998;ENST00000582139;ENST00000584778;ENST00000581393;ENST00000583458;ENST00000582344	GO:0000381(regulation of alternative mRNA splicing, via spliceosome);GO:0003676(nucleic acid binding);GO:0003677(DNA binding);GO:0003723(RNA binding);GO:0003729(mRNA binding);GO:0005634(nucleus);GO:0005737(cytoplasm);GO:0006397(mRNA processing);GO:0007399(nervous system development);GO:0008380(RNA splicing);GO:0043025(neuronal cell body);GO:0043204(perikaryon);GO:0043484(regulation of RNA splicin…	NA	K14946	NA	RNA binding fox-1 homolog 3 [Source:HGNC Symbol;Acc:HGNC:27097]	protein_coding;processed_transcript;retained_intron	NA	NA	1.34556	1.55387	1.30948	3.9742	4.05061	3.19858	0.375012	-1.41499	1.39081e-17	1.74877e-15	down	yes
ENSG00000047621	C12orf4	50040;50039;50047;50042;50045;50041;50044;50043	ENST00000545746;ENST00000261250;ENST00000535030;ENST00000509318;ENST00000535887;ENST00000544258;ENST00000544697;ENST00000541014	GO:0005737(cytoplasm);GO:0043304(regulation of mast cell degranulation);GO:0043304(regulation of mast cell degranulation)	NA	NA	NA	chromosome 12 open reading frame 4 [Source:HGNC Symbol;Acc:HGNC:1184]	protein_coding;retained_intron;processed_transcript;nonsense_mediated_decay	NA	NA	3.39603	2.30388	5.07051	0.774283	0.878093	0.589135	4.80498	2.26453	1.4027e-17	1.75739e-15	up	yes
ENSG00000181444	ZNF467	211399;211398	ENST00000302017;ENST00000484747	GO:0003676(nucleic acid binding);GO:0003677(DNA binding);GO:0005515(protein binding);GO:0005634(nucleus);GO:0006355(regulation of transcription, DNA-templated);GO:0046872(metal ion binding);GO:0046872(metal ion binding)	NA	NA	NA	zinc finger protein 467 [Source:HGNC Symbol;Acc:HGNC:23154]	protein_coding	NA	R_HSA_1266738(Developmental_Biology);R_HSA_381340(Transcriptional_regulation_of_white_adipocyte_differentiation)	1.75901	2.20049	2.54992	9.09379	7.69319	5.86416	0.287377	-1.79898	1.46058e-17	1.82338e-15	down	yes
ENSG00000118523	CCN2	199001	ENST00000367976	GO:0001502(cartilage condensation);GO:0001503(ossification);GO:0001525(angiogenesis);GO:0001894(tissue homeostasis);GO:0001934(positive regulation of protein phosphorylation);GO:0001968(fibronectin binding);GO:0005178(integrin binding);GO:0005515(protein binding);GO:0005520(insulin-like growth factor binding);GO:0005576(extracellular region);GO:0005615(extracellular space);GO:0005801(cis-Golgi ne…	04371(Apelin signaling pathway);04390(Hippo signaling pathway)	NA	NA	cellular communication network factor 2 [Source:HGNC Symbol;Acc:HGNC:2500]	protein_coding	DOID:18(urinary_system_disease);DOID:0080001(bone_disease);DOID:3996(urinary_system_cancer);DOID:13580(cholestasis);DOID:1307(dementia);DOID:2394(ovarian_cancer);DOID:4138(bile_duct_disease);DOID:0080015(physical_disorder);DOID:1324(lung_cancer);DOID:654(overnutrition);DOID:17(musculoskeletal_system_disease);DOID:5679(retinal_disease);DOID:0050687(cell_type_cancer);DOID:850(lung_disease);DOID:576…	R_HSA_212436(Generic_Transcription_Pathway);R_HSA_74160(Gene_expression_(Transcription));R_HSA_8878159(Transcriptional_regulation_by_RUNX3);R_HSA_73857(RNA_Polymerase_II_Transcription);R_HSA_2032785(YAP1__and_WWTR1_(TAZ)_stimulated_gene_expression);R_HSA_8951671(RUNX3_regulates_YAP1_mediated_transcription)	3.0367	3.8284	3.88658	10.8505	13.1502	9.08962	0.324919	-1.62185	1.59381e-17	1.98262e-15	down	yes
ENSG00000110719	TCIRG1	44076;44079;44086;44091;44085;44080;44088;44089;44078;44082;44077;44081;44084	ENST00000265686;ENST00000529657;ENST00000533005;ENST00000530449;ENST00000528981;ENST00000533947;ENST00000525516;ENST00000524870;ENST00000524598;ENST00000527530;ENST00000534673;ENST00000532635;ENST00000525724	GO:0000220(vacuolar proton-transporting V-type ATPase, V0 domain);GO:0001503(ossification);GO:0002158(osteoclast proliferation);GO:0002377(immunoglobulin production);GO:0005215(transporter activity);GO:0005515(protein binding);GO:0005634(nucleus);GO:0005764(lysosome);GO:0005765(lysosomal membrane);GO:0005770(late endosome);GO:0005886(plasma membrane);GO:0005887(integral component of plasma membra…	00190(Oxidative phosphorylation);04142(Lysosome);04145(Phagosome);04721(Synaptic vesicle cycle);04966(Collecting duct acid secretion);05110(Vibrio cholerae infection);05120(Epithelial cell signaling in Helicobacter pylori infection);05152(Tuberculosis);05165(Human papillomavirus infection);05323(Rheumatoid arthritis);05323(Rheumatoid arthritis)	K02154	NA	T cell immune regulator 1, ATPase H+ transporting V0 subunit a3 [Source:HGNC Symbol;Acc:HGNC:11647]	protein_coding;retained_intron;nonsense_mediated_decay	DOID:0080001(bone_disease);DOID:13533(osteopetrosis);DOID:17(musculoskeletal_system_disease);DOID:4(disease);DOID:4254(osteosclerosis);DOID:0080005(bone_remodeling_disease);DOID:7(disease_of_anatomical_entity)	R_HSA_2262752(Cellular_responses_to_stress);R_HSA_9711097(Cellular_response_to_starvation);R_HSA_382551(Transport_of_small_molecules);R_HSA_917937(Iron_uptake_and_transport);R_HSA_8953897(Cellular_responses_to_external_stimuli);R_HSA_9639288(Amino_acids_regulate_mTORC1);R_HSA_74752(Signaling_by_Insulin_receptor);R_HSA_168249(Innate_Immune_System);R_HSA_168256(Immune_System);R_HSA_77387(Insulin_re…	9.2533	11.354	9.22585	28.6154	28.2785	20.8838	0.383569	-1.38244	1.64542e-17	2.03956e-15	down	yes
ENSG00000130589	HELZ2	148059;148057;148061;148062;148060	ENST00000467148;ENST00000427522;ENST00000479540;ENST00000370082;ENST00000454223	GO:0000166(nucleotide binding);GO:0000184(nuclear-transcribed mRNA catabolic process, nonsense-mediated decay);GO:0003677(DNA binding);GO:0003723(RNA binding);GO:0003724(RNA helicase activity);GO:0004386(helicase activity);GO:0004540(ribonuclease activity);GO:0005515(protein binding);GO:0005524(ATP binding);GO:0005634(nucleus);GO:0005654(nucleoplasm);GO:0005737(cytoplasm);GO:0016020(membrane);GO:…	NA	NA	NA	helicase with zinc finger 2 [Source:HGNC Symbol;Acc:HGNC:30021]	protein_coding;processed_transcript;retained_intron	NA	R_HSA_2262752(Cellular_responses_to_stress);R_HSA_9707564(Cytoprotection_by_HMOX1);R_HSA_8957322(Metabolism_of_steroids);R_HSA_400253(Circadian_Clock);R_HSA_8953897(Cellular_responses_to_external_stimuli);R_HSA_1592230(Mitochondrial_biogenesis);R_HSA_1852241(Organelle_biogenesis_and_maintenance);R_HSA_1368082(RORA_activates_gene_expression);R_HSA_1655829(Regulation_of_cholesterol_biosynthesis_by_…	0.934908	1.0165	1.06227	3.4199	2.75217	2.34112	0.354001	-1.49818	1.7336e-17	2.13667e-15	down	yes
ENSG00000104722	NEFM	214074;214077	ENST00000221166;ENST00000433454	GO:0005198(structural molecule activity);GO:0005200(structural constituent of cytoskeleton);GO:0005515(protein binding);GO:0005737(cytoplasm);GO:0005856(cytoskeleton);GO:0005882(intermediate filament);GO:0005883(neurofilament);GO:0008017(microtubule binding);GO:0030424(axon);GO:0033693(neurofilament bundle assembly);GO:0042995(cell projection);GO:0045111(intermediate filament cytoskeleton);GO:009…	05014(Amyotrophic lateral sclerosis (ALS));05014(Amyotrophic lateral sclerosis (ALS))	K04573	NA	neurofilament medium [Source:HGNC Symbol;Acc:HGNC:7734]	protein_coding	DOID:230(lateral_sclerosis);DOID:1307(dementia);DOID:4(disease);DOID:5419(schizophrenia);DOID:1289(neurodegenerative_disease);DOID:10652(Alzheimer's_disease);DOID:680(tauopathy);DOID:2468(psychotic_disorder);DOID:863(nervous_system_disease);DOID:331(central_nervous_system_disease);DOID:1561(cognitive_disorder);DOID:150(disease_of_mental_health);DOID:231(motor_neuron_disease);DOID:7(disease_of_ana…	NA	0.0694442	0.048139	0.0645903	1.17159	0.705272	0.648627	0.072134	-3.79318	1.73599e-17	2.13667e-15	down	yes
ENSG00000133639	BTG1	58204;58206;58207	ENST00000256015;ENST00000673901;ENST00000552315	GO:0003712(transcription coregulator activity);GO:0005515(protein binding);GO:0005634(nucleus);GO:0005654(nucleoplasm);GO:0005737(cytoplasm);GO:0006355(regulation of transcription, DNA-templated);GO:0006479(protein methylation);GO:0006979(response to oxidative stress);GO:0007283(spermatogenesis);GO:0008285(negative regulation of cell population proliferation);GO:0016477(cell migration);GO:0019899…	03018(RNA degradation);03018(RNA degradation)	NA	NA	BTG anti-proliferation factor 1 [Source:HGNC Symbol;Acc:HGNC:1130]	protein_coding;processed_transcript	DOID:1240(leukemia);DOID:2531(hematologic_cancer);DOID:1037(lymphoblastic_leukemia);DOID:4(disease);DOID:162(cancer);DOID:14566(disease_of_cellular_proliferation);DOID:0060083(immune_system_cancer);DOID:0050686(organ_system_cancer)	R_HSA_212436(Generic_Transcription_Pathway);R_HSA_9614085(FOXO_mediated_transcription);R_HSA_74160(Gene_expression_(Transcription));R_HSA_9617828(FOXO_mediated_transcription_of_cell_cycle_genes);R_HSA_73857(RNA_Polymerase_II_Transcription)	21.6368	20.8048	15.4412	54.9327	50.6148	47.3391	0.3786	-1.40125	1.82008e-17	2.23232e-15	down	yes
ENSG00000042445	RETSAT	132042;132045;132048;132043;132046;132047;132044	ENST00000295802;ENST00000438611;ENST00000490291;ENST00000429806;ENST00000409984;ENST00000482694;ENST00000449375	GO:0005640(nuclear outer membrane);GO:0005783(endoplasmic reticulum);GO:0005789(endoplasmic reticulum membrane);GO:0016020(membrane);GO:0016491(oxidoreductase activity);GO:0031965(nuclear membrane);GO:0042572(retinol metabolic process);GO:0051786(all-trans-retinol 13,14-reductase activity);GO:0055114(oxidation-reduction process);GO:0055114(oxidation-reduction process)	00830(Retinol metabolism);00830(Retinol metabolism)	K09516	EC:1.3.99.23	retinol saturase [Source:HGNC Symbol;Acc:HGNC:25991]	protein_coding;nonsense_mediated_decay;retained_intron;processed_transcript	NA	R_HSA_196854(Metabolism_of_vitamins_and_cofactors);R_HSA_2187338(Visual_phototransduction);R_HSA_9709957(Sensory_Perception);R_HSA_975634(Retinoid_metabolism_and_transport);R_HSA_6806667(Metabolism_of_fat_soluble_vitamins);R_HSA_1430728(Metabolism)	9.66625	11.06	8.59779	27.45	26.8853	20.8863	0.389835	-1.35906	1.93083e-17	2.35987e-15	down	yes
ENSG00000179886	TIGD5	221174	ENST00000504548	GO:0003674(molecular_function);GO:0003676(nucleic acid binding);GO:0003677(DNA binding);GO:0005575(cellular_component);GO:0005634(nucleus);GO:0008150(biological_process)	NA	NA	NA	tigger transposable element derived 5 [Source:HGNC Symbol;Acc:HGNC:18336]	protein_coding	NA	NA	1.26992	0.998361	1.20658	3.64672	3.6095	2.91413	0.341666	-1.54934	1.97e-17	2.39936e-15	down	yes
ENSG00000188522	FAM83G	97836;97838;97839;97837	ENST00000388995;ENST00000399096;ENST00000580115;ENST00000345041	GO:0005515(protein binding);GO:0005634(nucleus);GO:0005737(cytoplasm);GO:0005829(cytosol);GO:0007165(signal transduction);GO:0019901(protein kinase binding);GO:0030509(BMP signaling pathway);GO:0030509(BMP signaling pathway)	NA	NA	NA	family with sequence similarity 83 member G [Source:HGNC Symbol;Acc:HGNC:32554]	protein_coding;retained_intron	NA	NA	3.26858	2.68633	3.96099	10.7245	9.95263	7.35769	0.353699	-1.4994	2.13527e-17	2.59161e-15	down	yes
ENSG00000140859	KIFC3	90440;90442;90434;90444;90462;90458;90446;90437;90448;90461;90438;90445;90467;90451;90447;90465;90433;90454;90459;90469;90441;90435;90450;90455;90453;90456;90439;90466;90436	ENST00000543930;ENST00000564136;ENST00000445690;ENST00000565753;ENST00000623271;ENST00000566975;ENST00000563266;ENST00000421376;ENST00000562503;ENST00000564204;ENST00000541240;ENST00000565270;ENST00000563028;ENST00000569112;ENST00000565481;ENST00000566914;ENST00000465878;ENST00000566648;ENST00000565684;ENST00000565871;ENST00000562903;ENST00000379655;ENST00000562311;ENST00000561524;ENST00000567204…	GO:0000166(nucleotide binding);GO:0003774(motor activity);GO:0003777(microtubule motor activity);GO:0005515(protein binding);GO:0005524(ATP binding);GO:0005737(cytoplasm);GO:0005794(Golgi apparatus);GO:0005813(centrosome);GO:0005815(microtubule organizing center);GO:0005856(cytoskeleton);GO:0005871(kinesin complex);GO:0005874(microtubule);GO:0005912(adherens junction);GO:0005915(zonula adherens);…	NA	K10406	NA	kinesin family member C3 [Source:HGNC Symbol;Acc:HGNC:6326]	protein_coding;nonsense_mediated_decay;retained_intron;TEC;processed_transcript	DOID:4(disease);DOID:162(cancer);DOID:14566(disease_of_cellular_proliferation)	R_HSA_390471(Association_of_TriC/CCT_with_target_proteins_during_biosynthesis);R_HSA_390466(Chaperonin_mediated_protein_folding);R_HSA_391251(Protein_folding);R_HSA_392499(Metabolism_of_proteins)	12.0185	11.9362	10.0744	32.2504	29.2164	22.2198	0.406624	-1.29823	2.17409e-17	2.6296e-15	down	yes
ENSG00000063245	EPN1	125345;125344;125348;125346;125347;125349	ENST00000085079;ENST00000270460;ENST00000586194;ENST00000411543;ENST00000591743;ENST00000589704	GO:0001701(in utero embryonic development);GO:0005515(protein binding);GO:0005543(phospholipid binding);GO:0005634(nucleus);GO:0005737(cytoplasm);GO:0005768(endosome);GO:0005829(cytosol);GO:0005886(plasma membrane);GO:0005905(clathrin-coated pit);GO:0006897(endocytosis);GO:0007219(Notch signaling pathway);GO:0007565(female pregnancy);GO:0008289(lipid binding);GO:0016020(membrane);GO:0030125(clath…	04144(Endocytosis);04144(Endocytosis)	K12471	NA	epsin 1 [Source:HGNC Symbol;Acc:HGNC:21604]	protein_coding;retained_intron;processed_transcript	NA	R_HSA_177929(Signaling_by_EGFR);R_HSA_5653656(Vesicle_mediated_transport);R_HSA_199991(Membrane_Trafficking);R_HSA_162582(Signal_Transduction);R_HSA_182971(EGFR_downregulation);R_HSA_8856825(Cargo_recognition_for_clathrin_mediated_endocytosis);R_HSA_8856828(Clathrin_mediated_endocytosis);R_HSA_9006934(Signaling_by_Receptor_Tyrosine_Kinases)	1.56426	1.50864	2.54074	6.70087	6.57325	4.95674	0.30792	-1.69937	2.35541e-17	2.83908e-15	down	yes
ENSG00000173039	RELA	43220;43230;43221;43233;43223;43238;43232;43242;43239;43218;43241;43243;43244;43237;43240;43227;43234;43224;43226;43231	ENST00000525693;ENST00000526738;ENST00000406246;ENST00000527749;ENST00000308639;ENST00000525301;ENST00000534558;ENST00000534305;ENST00000533187;ENST00000615805;ENST00000525858;ENST00000532776;ENST00000534283;ENST00000527074;ENST00000527874;ENST00000529389;ENST00000529330;ENST00000531484;ENST00000526257;ENST00000527909	GO:0000122(negative regulation of transcription by RNA polymerase II);GO:0000790(nuclear chromatin);GO:0000976(transcription regulatory region sequence-specific DNA binding);GO:0000977(RNA polymerase II regulatory region sequence-specific DNA binding);GO:0000978(RNA polymerase II cis-regulatory region sequence-specific DNA binding);GO:0000979(RNA polymerase II core promoter sequence-specific DNA …	01523(Antifolate resistance);04010(MAPK signaling pathway);04014(Ras signaling pathway);04024(cAMP signaling pathway);04062(Chemokine signaling pathway);04064(NF-kappa B signaling pathway);04066(HIF-1 signaling pathway);04071(Sphingolipid signaling pathway);04137(Mitophagy - animal);04151(PI3K-Akt signaling pathway);04210(Apoptosis);04211(Longevity regulating pathway);04218(Cellular senescence);0…	K04735	NA	RELA proto-oncogene, NF-kB subunit [Source:HGNC Symbol;Acc:HGNC:9955]	protein_coding;retained_intron;nonsense_mediated_decay	DOID:18(urinary_system_disease);DOID:3996(urinary_system_cancer);DOID:0050339(commensal_bacterial_infectious_disease);DOID:2394(ovarian_cancer);DOID:10286(prostate_carcinoma);DOID:1240(leukemia);DOID:934(viral_infectious_disease);DOID:1612(breast_cancer);DOID:3458(breast_adenocarcinoma);DOID:2531(hematologic_cancer);DOID:28(endocrine_system_disease);DOID:2957(pulmonary_tuberculosis);DOID:1324(lun…	R_HSA_212436(Generic_Transcription_Pathway);R_HSA_2262752(Cellular_responses_to_stress);R_HSA_2559582(Senescence_Associated_Secretory_Phenotype_(SASP));R_HSA_975138(TRAF6_mediated_induction_of_NFkB_and_MAP_kinases_upon_TLR7/8_or_9_activation);R_HSA_5621481(C_type_lectin_receptors_(CLRs));R_HSA_597592(Post_translational_protein_modification);R_HSA_202424(Downstream_TCR_signaling);R_HSA_5260271(Dis…	4.89681	6.16205	6.17115	17.6373	16.1909	12.4803	0.37207	-1.42635	2.47718e-17	2.97559e-15	down	yes
ENSG00000231925	TAPBP	194248;194254;194249;194250;194251;194255;194253;194252;194256	ENST00000434618;ENST00000456592;ENST00000475304;ENST00000489157;ENST00000426633;ENST00000467025;ENST00000437116;ENST00000480730;ENST00000476333	GO:0000139(Golgi membrane);GO:0002397(MHC class I protein complex assembly);GO:0002398(MHC class Ib protein complex assembly);GO:0002474(antigen processing and presentation of peptide antigen via MHC class I);GO:0002479(antigen processing and presentation of exogenous peptide antigen via MHC class I, TAP-dependent);GO:0005515(protein binding);GO:0005783(endoplasmic reticulum);GO:0005789(endoplasm…	04612(Antigen processing and presentation);05163(Human cytomegalovirus infection);05168(Herpes simplex virus 1 infection);05169(Epstein-Barr virus infection);05170(Human immunodeficiency virus 1 infection);05170(Human immunodeficiency virus 1 infection)	K08058	NA	TAP binding protein [Source:HGNC Symbol;Acc:HGNC:11566]	protein_coding;retained_intron	DOID:225(syndrome);DOID:0050687(cell_type_cancer);DOID:627(severe_combined_immunodeficiency);DOID:4(disease);DOID:612(primary_immunodeficiency_disease);DOID:1749(squamous_cell_carcinoma);DOID:628(combined_T_cell_and_B_cell_immunodeficiency);DOID:162(cancer);DOID:1909(melanoma);DOID:14566(disease_of_cellular_proliferation);DOID:2914(immune_system_disease);DOID:5812(MHC_class_II_deficiency);DOID:30…	R_HSA_983169(Class_I_MHC_mediated_antigen_processing_&_presentation);R_HSA_983170(Antigen_Presentation:_Folding,_assembly_and_peptide_loading_of_class_I_MHC);R_HSA_168256(Immune_System);R_HSA_1236975(Antigen_processing_Cross_presentation);R_HSA_1280218(Adaptive_Immune_System);R_HSA_1236974(ER_Phagosome_pathway)	4.55719	5.75703	6.02385	17.3287	15.9431	11.9638	0.361177	-1.46922	2.89328e-17	3.46352e-15	down	yes
ENSG00000139289	PHLDA1	57592;57593;57591	ENST00000619060;ENST00000266671;ENST00000602540	GO:0000086(G2/M transition of mitotic cell cycle);GO:0005515(protein binding);GO:0005634(nucleus);GO:0005654(nucleoplasm);GO:0005730(nucleolus);GO:0005737(cytoplasm);GO:0005829(cytosol);GO:0006915(apoptotic process);GO:0031410(cytoplasmic vesicle);GO:0043065(positive regulation of apoptotic process);GO:0045210(FasL biosynthetic process);GO:1901981(phosphatidylinositol phosphate binding);GO:190198…	NA	NA	NA	pleckstrin homology like domain family A member 1 [Source:HGNC Symbol;Acc:HGNC:8933]	protein_coding	DOID:936(brain_disease);DOID:4(disease);DOID:162(cancer);DOID:863(nervous_system_disease);DOID:14566(disease_of_cellular_proliferation);DOID:331(central_nervous_system_disease);DOID:1826(epilepsy_syndrome);DOID:7(disease_of_anatomical_entity)	R_HSA_69275(G2/M_Transition);R_HSA_8854521(Interaction_between_PHLDA1_and_AURKA);R_HSA_1640170(Cell_Cycle);R_HSA_453274(Mitotic_G2_G2/M_phases);R_HSA_69278(Cell_Cycle,_Mitotic)	10.914	12.5716	7.79808	33.0228	31.4597	26.9606	0.342111	-1.54747	2.92211e-17	3.48609e-15	down	yes
ENSG00000163346	PBXIP1	20787;20786;20789;20790;20788;20792	ENST00000368463;ENST00000368465;ENST00000498553;ENST00000490230;ENST00000368460;ENST00000493133	GO:0003714(transcription corepressor activity);GO:0005515(protein binding);GO:0005634(nucleus);GO:0005737(cytoplasm);GO:0005829(cytosol);GO:0005856(cytoskeleton);GO:0005874(microtubule);GO:0007275(multicellular organism development);GO:0016020(membrane);GO:0030154(cell differentiation);GO:0045892(negative regulation of transcription, DNA-templated);GO:2001106(regulation of Rho guanyl-nucleotide e…	NA	NA	NA	PBX homeobox interacting protein 1 [Source:HGNC Symbol;Acc:HGNC:21199]	protein_coding;processed_transcript;nonsense_mediated_decay	NA	NA	7.98751	7.40802	7.66521	19.7893	18.1719	15.4511	0.43175	-1.21173	3.5235e-17	4.18925e-15	down	yes
ENSG00000103005	USB1	90490;90504;90499;90494;90492;90503;90489;90497;90502;90496;90495;90491;90493	ENST00000539737;ENST00000566082;ENST00000563149;ENST00000219281;ENST00000561568;ENST00000565151;ENST00000561743;ENST00000562534;ENST00000624720;ENST00000569252;ENST00000566292;ENST00000423271;ENST00000565662	GO:0000175(3'-5'-exoribonuclease activity);GO:0004518(nuclease activity);GO:0005634(nucleus);GO:0005654(nucleoplasm);GO:0008380(RNA splicing);GO:0016787(hydrolase activity);GO:0034477(U6 snRNA 3'-end processing);GO:0045171(intercellular bridge);GO:0090305(nucleic acid phosphodiester bond hydrolysis);GO:0090503(RNA phosphodiester bond hydrolysis, exonucleolytic);GO:1990838(poly(U)-specific exoribo…	NA	K23093	EC:3.1.4.-	U6 snRNA biogenesis phosphodiesterase 1 [Source:HGNC Symbol;Acc:HGNC:25792]	protein_coding;retained_intron;processed_transcript;TEC	DOID:1227(neutropenia);DOID:225(syndrome);DOID:4(disease);DOID:615(leukopenia);DOID:9500(leukocyte_disease);DOID:12987(agranulocytosis);DOID:74(hematopoietic_system_disease);DOID:2914(immune_system_disease);DOID:7(disease_of_anatomical_entity)	NA	4.82529	4.98405	6.01993	16.0353	15.4938	10.4638	0.376952	-1.40755	3.59137e-17	4.25547e-15	down	yes
ENSG00000140564	FURIN	82506;82507;82511;82509;82512;82513;82508	ENST00000268171;ENST00000610579;ENST00000558794;ENST00000618099;ENST00000560018;ENST00000640725;ENST00000559353	GO:0000139(Golgi membrane);GO:0001825(blastocyst formation);GO:0002020(protease binding);GO:0004175(endopeptidase activity);GO:0004252(serine-type endopeptidase activity);GO:0004867(serine-type endopeptidase inhibitor activity);GO:0005515(protein binding);GO:0005576(extracellular region);GO:0005768(endosome);GO:0005783(endoplasmic reticulum);GO:0005794(Golgi apparatus);GO:0005796(Golgi lumen);GO:…	05164(Influenza A);05164(Influenza A)	K01349	EC:3.4.21.75	furin, paired basic amino acid cleaving enzyme [Source:HGNC Symbol;Acc:HGNC:8568]	protein_coding;nonsense_mediated_decay;retained_intron	DOID:2394(ovarian_cancer);DOID:934(viral_infectious_disease);DOID:630(genetic_disease);DOID:225(syndrome);DOID:0050687(cell_type_cancer);DOID:0050117(disease_by_infectious_agent);DOID:4(disease);DOID:0050177(monogenic_disease);DOID:0050828(artery_disease);DOID:1749(squamous_cell_carcinoma);DOID:409(liver_disease);DOID:12894(Sjogren's_syndrome);DOID:77(gastrointestinal_system_disease);DOID:1485(cy…	R_HSA_166520(Signaling_by_NTRKs);R_HSA_9662851(Anti_inflammatory_response_favouring_Leishmania_parasite_infection);R_HSA_5339562(Uptake_and_actions_of_bacterial_toxins);R_HSA_9694516(SARS_CoV_2_Infection);R_HSA_1442490(Collagen_degradation);R_HSA_157118(Signaling_by_NOTCH);R_HSA_597592(Post_translational_protein_modification);R_HSA_1474244(Extracellular_matrix_organization);R_HSA_382551(Transport…	5.92258	6.27887	7.66225	18.0383	18.5797	14.0858	0.39176	-1.35196	3.78708e-17	4.47221e-15	down	yes
ENSG00000167632	TRAPPC9	220711;220714;220715;220718;220716;220725;220719;220720;220729;220730;220732;220721;220712	ENST00000438773;ENST00000520857;ENST00000521667;ENST00000519482;ENST00000522504;ENST00000517667;ENST00000524162;ENST00000523777;ENST00000518839;ENST00000634178;ENST00000521944;ENST00000518723;ENST00000648948	GO:0000139(Golgi membrane);GO:0005515(protein binding);GO:0005737(cytoplasm);GO:0005783(endoplasmic reticulum);GO:0005794(Golgi apparatus);GO:0005802(trans-Golgi network);GO:0005829(cytosol);GO:0021987(cerebral cortex development);GO:0030008(TRAPP complex);GO:0030154(cell differentiation);GO:0030182(neuron differentiation);GO:0048208(COPII vesicle coating);GO:0051092(positive regulation of NF-kap…	NA	K20306	NA	trafficking protein particle complex 9 [Source:HGNC Symbol;Acc:HGNC:30832]	protein_coding;retained_intron;processed_transcript	DOID:0060037(developmental_disorder_of_mental_health);DOID:4(disease);DOID:1059(intellectual_disability);DOID:150(disease_of_mental_health);DOID:0060038(specific_developmental_disorder)	R_HSA_446203(Asparagine_N_linked_glycosylation);R_HSA_597592(Post_translational_protein_modification);R_HSA_5653656(Vesicle_mediated_transport);R_HSA_199991(Membrane_Trafficking);R_HSA_204005(COPII_mediated_vesicle_transport);R_HSA_199977(ER_to_Golgi_Anterograde_Transport);R_HSA_948021(Transport_to_the_Golgi_and_subsequent_modification);R_HSA_392499(Metabolism_of_proteins);R_HSA_9007101(Rab_regul…	1.8172	2.06212	2.0413	5.5066	5.36647	4.11622	0.39499	-1.34011	4.38968e-17	5.16637e-15	down	yes
ENSG00000129657	SEC14L1	106445;106450;106449;106446;106433;106443;106442;106452;106448;106432;106460;106459;106447;106455;106461;106457;106434;106441;106444;106438	ENST00000436233;ENST00000591437;ENST00000591786;ENST00000443798;ENST00000589827;ENST00000588880;ENST00000586390;ENST00000588616;ENST00000587820;ENST00000561721;ENST00000591413;ENST00000587491;ENST00000588696;ENST00000589202;ENST00000588721;ENST00000587821;ENST00000392476;ENST00000586429;ENST00000585618;ENST00000430767	GO:0002376(immune system process);GO:0005515(protein binding);GO:0005654(nucleoplasm);GO:0005737(cytoplasm);GO:0005758(mitochondrial intermembrane space);GO:0005794(Golgi apparatus);GO:0005829(cytosol);GO:0009968(negative regulation of signal transduction);GO:0015871(choline transport);GO:0039536(negative regulation of RIG-I signaling pathway);GO:0039552(RIG-I binding);GO:0045087(innate immune re…	NA	NA	NA	SEC14 like lipid binding 1 [Source:HGNC Symbol;Acc:HGNC:10698]	protein_coding;nonsense_mediated_decay;processed_transcript;retained_intron	NA	NA	4.46325	4.8473	4.7528	11.3689	11.6804	9.12896	0.437046	-1.19414	4.52544e-17	5.30828e-15	down	yes
ENSG00000175274	TP53I11	40119;40103;40106;40102;40108;40095;40117;40105;40116;40114;40121;40112;40107;40120;40113;40115;40109	ENST00000533443;ENST00000525680;ENST00000533940;ENST00000395648;ENST00000524774;ENST00000354556;ENST00000525683;ENST00000616990;ENST00000525145;ENST00000525667;ENST00000530035;ENST00000531130;ENST00000532253;ENST00000627720;ENST00000531928;ENST00000532921;ENST00000528473	GO:0008285(negative regulation of cell population proliferation);GO:0016020(membrane);GO:0016021(integral component of membrane);GO:0016021(integral component of membrane)	NA	NA	NA	tumor protein p53 inducible protein 11 [Source:HGNC Symbol;Acc:HGNC:16842]	protein_coding;retained_intron;nonsense_mediated_decay;processed_transcript	DOID:4(disease);DOID:162(cancer);DOID:14566(disease_of_cellular_proliferation)	NA	3.98197	4.17916	5.15489	12.6258	12.3784	9.32887	0.387848	-1.36644	4.65114e-17	5.43748e-15	down	yes
ENSG00000105287	PRKD2	122435;122433;122441;122451;122436;122438;122450;122440;122443;122447;122437;122446;122445;122442;122434;122439	ENST00000291281;ENST00000601806;ENST00000595515;ENST00000593363;ENST00000433867;ENST00000600194;ENST00000597088;ENST00000597589;ENST00000599464;ENST00000595132;ENST00000602155;ENST00000597641;ENST00000601605;ENST00000593492;ENST00000597390;ENST00000599019	GO:0000166(nucleotide binding);GO:0001525(angiogenesis);GO:0001938(positive regulation of endothelial cell proliferation);GO:0002250(adaptive immune response);GO:0002376(immune system process);GO:0004672(protein kinase activity);GO:0004674(protein serine/threonine kinase activity);GO:0004697(protein kinase C activity);GO:0004698(calcium-dependent protein kinase C activity);GO:0005080(protein kina…	04015(Rap1 signaling pathway);04925(Aldosterone synthesis and secretion);04925(Aldosterone synthesis and secretion)	K06070	EC:2.7.11.13	protein kinase D2 [Source:HGNC Symbol;Acc:HGNC:17293]	protein_coding;retained_intron;nonsense_mediated_decay;processed_transcript	DOID:1240(leukemia);DOID:2531(hematologic_cancer);DOID:4(disease);DOID:162(cancer);DOID:14566(disease_of_cellular_proliferation);DOID:0060083(immune_system_cancer);DOID:0050686(organ_system_cancer)	R_HSA_428157(Sphingolipid_metabolism);R_HSA_1660661(Sphingolipid_de_novo_biosynthesis);R_HSA_556833(Metabolism_of_lipids);R_HSA_1430728(Metabolism)	2.9038	3.22425	3.83954	9.88355	9.26148	7.63218	0.372242	-1.42569	4.911e-17	5.72213e-15	down	yes
ENSG00000108559	NUP88	95515;95521;95518;95517;95525;95511;95512;95523;95524;95516;95519;95522;95520	ENST00000573584;ENST00000574867;ENST00000574087;ENST00000574855;ENST00000572019;ENST00000573169;ENST00000576708;ENST00000572809;ENST00000572290;ENST00000225696;ENST00000576862;ENST00000570937;ENST00000575976	GO:0000055(ribosomal large subunit export from nucleus);GO:0000056(ribosomal small subunit export from nucleus);GO:0000278(mitotic cell cycle);GO:0005215(transporter activity);GO:0005515(protein binding);GO:0005634(nucleus);GO:0005643(nuclear pore);GO:0005654(nucleoplasm);GO:0005829(cytosol);GO:0006110(regulation of glycolytic process);GO:0006406(mRNA export from nucleus);GO:0006409(tRNA export f…	03013(RNA transport);03013(RNA transport)	K14318	NA	nucleoporin 88 [Source:HGNC Symbol;Acc:HGNC:8067]	protein_coding;retained_intron;processed_transcript;nonsense_mediated_decay	NA	R_HSA_3232142(SUMOylation_of_ubiquitinylation_proteins);R_HSA_4551638(SUMOylation_of_chromatin_organization_proteins);R_HSA_2262752(Cellular_responses_to_stress);R_HSA_9609646(HCMV_Infection);R_HSA_5619107(Defective_TPR_may_confer_susceptibility_towards_thyroid_papillary_carcinoma_(TPC));R_HSA_72202(Transport_of_Mature_Transcript_to_Cytoplasm);R_HSA_168333(NEP/NS2_Interacts_with_the_Cellular_Expo…	13.2094	12.5792	15.1314	5.51353	6.37085	4.8185	2.44988	1.29271	5.49189e-17	6.37771e-15	up	yes
ENSG00000265735	RN7SL5P	222266	ENST00000581458	NA	NA	NA	NA	RNA, 7SL, cytoplasmic 5, pseudogene [Source:HGNC Symbol;Acc:HGNC:10040]	misc_RNA	NA	NA	15.318	12.8408	8.88565	0.454412	0.210314	1.20286	19.8354	4.31001	5.73823e-17	6.64171e-15	up	yes
ENSG00000183386	FHL3	12774;12776;12773;12775;12777	ENST00000373016;ENST00000477194;ENST00000485803;ENST00000475084;ENST00000483132	GO:0001725(stress fiber);GO:0003712(transcription coregulator activity);GO:0003779(actin binding);GO:0005515(protein binding);GO:0005634(nucleus);GO:0005737(cytoplasm);GO:0005925(focal adhesion);GO:0007517(muscle organ development);GO:0030018(Z disc);GO:0030036(actin cytoskeleton organization);GO:0046872(metal ion binding);GO:1903506(regulation of nucleic acid-templated transcription);GO:1903506(…	NA	NA	NA	four and a half LIM domains 3 [Source:HGNC Symbol;Acc:HGNC:3704]	protein_coding;processed_transcript	NA	NA	1.32859	1.94671	1.64484	6.83239	6.92622	4.95518	0.262915	-1.92733	6.22989e-17	7.18699e-15	down	yes
ENSG00000116273	PHF13	9240	ENST00000377648	GO:0000278(mitotic cell cycle);GO:0003682(chromatin binding);GO:0005634(nucleus);GO:0005654(nucleoplasm);GO:0006325(chromatin organization);GO:0007049(cell cycle);GO:0007059(chromosome segregation);GO:0007076(mitotic chromosome condensation);GO:0030261(chromosome condensation);GO:0035064(methylated histone binding);GO:0046872(metal ion binding);GO:0051301(cell division)	NA	NA	NA	PHD finger protein 13 [Source:HGNC Symbol;Acc:HGNC:22983]	protein_coding	NA	NA	2.40902	1.49469	3.05163	10.1598	9.33357	6.83897	0.264136	-1.92065	6.37344e-17	7.32841e-15	down	yes
ENSG00000196498	NCOR2	61461;61484;61468;61463;61475;61478;61483;61482;61462;61477;61476;61465;61481;61470;61459;61466;61469;61460;61480;61474;61473;61471;61464;61467	ENST00000356219;ENST00000542565;ENST00000440337;ENST00000429285;ENST00000473999;ENST00000448614;ENST00000448008;ENST00000542927;ENST00000404121;ENST00000493859;ENST00000536195;ENST00000443451;ENST00000494460;ENST00000474079;ENST00000405201;ENST00000413172;ENST00000461081;ENST00000404621;ENST00000420698;ENST00000458234;ENST00000453428;ENST00000440187;ENST00000418829;ENST00000464377	GO:0000118(histone deacetylase complex);GO:0000122(negative regulation of transcription by RNA polymerase II);GO:0000785(chromatin);GO:0000790(nuclear chromatin);GO:0000977(RNA polymerase II regulatory region sequence-specific DNA binding);GO:0003677(DNA binding);GO:0003682(chromatin binding);GO:0003714(transcription corepressor activity);GO:0005112(Notch binding);GO:0005515(protein binding);GO:0…	04330(Notch signaling pathway);05169(Epstein-Barr virus infection);05169(Epstein-Barr virus infection)	K06065	NA	nuclear receptor corepressor 2 [Source:HGNC Symbol;Acc:HGNC:7673]	protein_coding;retained_intron	DOID:934(viral_infectious_disease);DOID:0050117(disease_by_infectious_agent);DOID:4(disease);DOID:162(cancer);DOID:526(Human_immunodeficiency_virus_infectious_disease);DOID:14566(disease_of_cellular_proliferation)	R_HSA_212436(Generic_Transcription_Pathway);R_HSA_2262752(Cellular_responses_to_stress);R_HSA_9707564(Cytoprotection_by_HMOX1);R_HSA_9609646(HCMV_Infection);R_HSA_2894858(Signaling_by_NOTCH1_HD+PEST_Domain_Mutants_in_Cancer);R_HSA_8986944(Transcriptional_Regulation_by_MECP2);R_HSA_9675151(Disorders_of_Developmental_Biology);R_HSA_9006931(Signaling_by_Nuclear_Receptors);R_HSA_9022692(Regulation_of…	4.31961	4.48978	6.59858	15.9482	16.059	12.0657	0.349603	-1.51621	6.57271e-17	7.53276e-15	down	yes
ENSG00000167535	CACNB3	53766;53752;53754;53774;53771;53757;53756;53765;53764;53772;53769;53760;53759;53775;53761;53753;53762;53763;53755;53758	ENST00000301050;ENST00000547693;ENST00000540990;ENST00000550483;ENST00000551544;ENST00000536187;ENST00000548860;ENST00000547818;ENST00000549971;ENST00000552812;ENST00000550771;ENST00000550168;ENST00000551716;ENST00000552480;ENST00000552465;ENST00000550391;ENST00000550064;ENST00000552022;ENST00000549226;ENST00000548874	GO:0005244(voltage-gated ion channel activity);GO:0005245(voltage-gated calcium channel activity);GO:0005246(calcium channel regulator activity);GO:0005262(calcium channel activity);GO:0005515(protein binding);GO:0005737(cytoplasm);GO:0005829(cytosol);GO:0005886(plasma membrane);GO:0005891(voltage-gated calcium channel complex);GO:0006811(ion transport);GO:0006816(calcium ion transport);GO:000726…	04010(MAPK signaling pathway);04260(Cardiac muscle contraction);04261(Adrenergic signaling in cardiomyocytes);04921(Oxytocin signaling pathway);05410(Hypertrophic cardiomyopathy (HCM));05412(Arrhythmogenic right ventricular cardiomyopathy (ARVC));05414(Dilated cardiomyopathy (DCM));05414(Dilated cardiomyopathy (DCM))	NA	NA	calcium voltage-gated channel auxiliary subunit beta 3 [Source:HGNC Symbol;Acc:HGNC:1403]	protein_coding;retained_intron;nonsense_mediated_decay;processed_transcript	NA	R_HSA_375165(NCAM_signaling_for_neurite_out_growth);R_HSA_163685(Integration_of_energy_metabolism);R_HSA_400042(Adrenaline,noradrenaline_inhibits_insulin_secretion);R_HSA_1266738(Developmental_Biology);R_HSA_112315(Transmission_across_Chemical_Synapses);R_HSA_419037(NCAM1_interactions);R_HSA_112308(Presynaptic_depolarization_and_calcium_channel_opening);R_HSA_9675108(Nervous_system_development);R…	2.11085	2.1397	1.89441	5.98411	5.29172	4.50835	0.389311	-1.36101	6.82479e-17	7.7961e-15	down	yes
ENSG00000132535	DLG4	95823;95826;95822;95827;95840;95833;95839;95842;95845;95838;95834;95831;95830;95828;95832;95841;95836;95829;95821;95824;95825;95843	ENST00000302955;ENST00000649520;ENST00000489885;ENST00000491753;ENST00000486626;ENST00000648103;ENST00000647975;ENST00000447163;ENST00000650301;ENST00000485100;ENST00000650120;ENST00000649514;ENST00000649186;ENST00000648707;ENST00000648896;ENST00000493294;ENST00000648263;ENST00000649971;ENST00000399506;ENST00000399510;ENST00000648172;ENST00000648658	GO:0000165(MAPK cascade);GO:0002091(negative regulation of receptor internalization);GO:0005515(protein binding);GO:0005737(cytoplasm);GO:0005783(endoplasmic reticulum);GO:0005829(cytosol);GO:0005886(plasma membrane);GO:0007165(signal transduction);GO:0007204(positive regulation of cytosolic calcium ion concentration);GO:0007268(chemical synaptic transmission);GO:0007399(nervous system developmen…	04390(Hippo signaling pathway);04724(Glutamatergic synapse);05016(Huntington disease);05030(Cocaine addiction);05030(Cocaine addiction)	K11828	NA	discs large MAGUK scaffold protein 4 [Source:HGNC Symbol;Acc:HGNC:2903]	protein_coding;retained_intron;nonsense_mediated_decay	DOID:1307(dementia);DOID:4(disease);DOID:5419(schizophrenia);DOID:1289(neurodegenerative_disease);DOID:10652(Alzheimer's_disease);DOID:680(tauopathy);DOID:2468(psychotic_disorder);DOID:863(nervous_system_disease);DOID:331(central_nervous_system_disease);DOID:1561(cognitive_disorder);DOID:150(disease_of_mental_health);DOID:7(disease_of_anatomical_entity)	R_HSA_194315(Signaling_by_Rho_GTPases);R_HSA_9617324(Negative_regulation_of_NMDA_receptor_mediated_neuronal_transmission);R_HSA_6794361(Neurexins_and_neuroligins);R_HSA_5683057(MAPK_family_signaling_cascades);R_HSA_442742(CREB1_phosphorylation_through_NMDA_receptor_mediated_activation_of_RAS_signaling);R_HSA_438066(Unblocking_of_NMDA_receptors,_glutamate_binding_and_activation);R_HSA_5682910(LGI_…	1.22256	1.48189	0.996036	3.92562	3.717	3.43057	0.334184	-1.58128	6.87001e-17	7.82219e-15	down	yes
ENSG00000173442	EHBP1L1	43172;43171;43174;43180;43173;43175;43178;43179;43181;43176	ENST00000309295;ENST00000533237;ENST00000531106;ENST00000527214;ENST00000634639;ENST00000526990;ENST00000529596;ENST00000533364;ENST00000529056;ENST00000533465	GO:0003674(molecular_function);GO:0005515(protein binding);GO:0005768(endosome);GO:0005815(microtubule organizing center);GO:0008150(biological_process);GO:0016020(membrane);GO:0030036(actin cytoskeleton organization);GO:0031941(filamentous actin);GO:0031941(filamentous actin)	NA	NA	NA	EH domain binding protein 1 like 1 [Source:HGNC Symbol;Acc:HGNC:30682]	protein_coding;processed_transcript;retained_intron	NA	NA	6.48241	6.82837	7.72947	16.9117	18.1105	14.2127	0.427344	-1.22653	7.43025e-17	8.40759e-15	down	yes
ENSG00000130669	PAK4	120456;120457;120454;120455;120462;120458;120452;120459;120453;120464;120461	ENST00000358301;ENST00000597766;ENST00000321944;ENST00000593480;ENST00000360442;ENST00000593690;ENST00000602004;ENST00000599386;ENST00000599470;ENST00000600350;ENST00000599657	GO:0000166(nucleotide binding);GO:0001558(regulation of cell growth);GO:0004672(protein kinase activity);GO:0004674(protein serine/threonine kinase activity);GO:0005515(protein binding);GO:0005524(ATP binding);GO:0005737(cytoplasm);GO:0005794(Golgi apparatus);GO:0005912(adherens junction);GO:0005925(focal adhesion);GO:0006468(protein phosphorylation);GO:0006915(apoptotic process);GO:0007010(cytos…	04012(ErbB signaling pathway);04014(Ras signaling pathway);04360(Axon guidance);04510(Focal adhesion);04660(T cell receptor signaling pathway);04810(Regulation of actin cytoskeleton);05170(Human immunodeficiency virus 1 infection);05206(MicroRNAs in cancer);05211(Renal cell carcinoma);05211(Renal cell carcinoma)	K05734	EC:2.7.11.1	p21 (RAC1) activated kinase 4 [Source:HGNC Symbol;Acc:HGNC:16059]	protein_coding;processed_transcript;retained_intron	DOID:684(hepatocellular_carcinoma);DOID:3571(liver_cancer);DOID:4(disease);DOID:162(cancer);DOID:3119(gastrointestinal_system_cancer);DOID:14566(disease_of_cellular_proliferation);DOID:686(liver_carcinoma);DOID:0050686(organ_system_cancer)	R_HSA_194315(Signaling_by_Rho_GTPases);R_HSA_9012999(RHO_GTPase_cycle);R_HSA_9013149(RAC1_GTPase_cycle);R_HSA_9716542(Signaling_by_Rho_GTPases,_Miro_GTPases_and_RHOBTB3);R_HSA_9013407(RHOH_GTPase_cycle);R_HSA_9013148(CDC42_GTPase_cycle);R_HSA_9013423(RAC3_GTPase_cycle);R_HSA_9013408(RHOG_GTPase_cycle);R_HSA_1266738(Developmental_Biology);R_HSA_428540(Activation_of_RAC1);R_HSA_9013409(RHOJ_GTPase_…	5.60063	6.36455	6.84117	17.3461	16.0154	12.7992	0.407411	-1.29544	7.43226e-17	8.40759e-15	down	yes
ENSG00000135677	GNS	56828;56830;56834;56829;56827;56835;56832;56833;56831	ENST00000258145;ENST00000542058;ENST00000540883;ENST00000543646;ENST00000418919;ENST00000545273;ENST00000537823;ENST00000540196;ENST00000541781	GO:0003824(catalytic activity);GO:0005515(protein binding);GO:0005539(glycosaminoglycan binding);GO:0005576(extracellular region);GO:0005764(lysosome);GO:0006027(glycosaminoglycan catabolic process);GO:0008449(N-acetylglucosamine-6-sulfatase activity);GO:0008484(sulfuric ester hydrolase activity);GO:0016787(hydrolase activity);GO:0030203(glycosaminoglycan metabolic process);GO:0035578(azurophil g…	00531(Glycosaminoglycan degradation);04142(Lysosome);04142(Lysosome)	K01137	EC:3.1.6.14	glucosamine (N-acetyl)-6-sulfatase [Source:HGNC Symbol;Acc:HGNC:4422]	protein_coding;retained_intron	DOID:225(syndrome);DOID:4(disease);DOID:12798(mucopolysaccharidosis);DOID:0014667(disease_of_metabolism);DOID:3211(lysosomal_storage_disease);DOID:655(inherited_metabolic_disorder)	R_HSA_2206281(Mucopolysaccharidoses);R_HSA_5653656(Vesicle_mediated_transport);R_HSA_2206305(MPS_IIID_Sanfilippo_syndrome_D);R_HSA_199991(Membrane_Trafficking);R_HSA_5663084(Diseases_of_carbohydrate_metabolism);R_HSA_168249(Innate_Immune_System);R_HSA_432720(Lysosome_Vesicle_Biogenesis);R_HSA_199992(trans_Golgi_Network_Vesicle_Budding);R_HSA_71387(Metabolism_of_carbohydrates);R_HSA_5668914(Diseas…	22.1698	21.2702	24.2416	54.78	54.7183	41.3184	0.448767	-1.15596	7.51677e-17	8.47576e-15	down	yes
ENSG00000239672	NME1	103310;103317;103313;103312;103314;103322;103315;103321;103320;103311	ENST00000393196;ENST00000475573;ENST00000480143;ENST00000336097;ENST00000512768;ENST00000465188;ENST00000511355;ENST00000456492;ENST00000013034;ENST00000487481	GO:0000166(nucleotide binding);GO:0000287(magnesium ion binding);GO:0000977(RNA polymerase II regulatory region sequence-specific DNA binding);GO:0002762(negative regulation of myeloid leukocyte differentiation);GO:0003697(single-stranded DNA binding);GO:0003723(RNA binding);GO:0004536(deoxyribonuclease activity);GO:0004550(nucleoside diphosphate kinase activity);GO:0005515(protein binding);GO:00…	00230(Purine metabolism);00240(Pyrimidine metabolism);00983(Drug metabolism - other enzymes);00983(Drug metabolism - other enzymes)	K00940	EC:2.7.4.6	NME/NM23 nucleoside diphosphate kinase 1 [Source:HGNC Symbol;Acc:HGNC:7849]	protein_coding;nonsense_mediated_decay;retained_intron	DOID:2394(ovarian_cancer);DOID:1240(leukemia);DOID:1612(breast_cancer);DOID:2531(hematologic_cancer);DOID:1324(lung_cancer);DOID:5679(retinal_disease);DOID:3111(cystadenocarcinoma);DOID:12603(acute_leukemia);DOID:630(genetic_disease);DOID:225(syndrome);DOID:0050687(cell_type_cancer);DOID:4(disease);DOID:0050177(monogenic_disease);DOID:1749(squamous_cell_carcinoma);DOID:1192(peripheral_nervous_sys…	R_HSA_499943(Interconversion_of_nucleotide_di__and_triphosphates);R_HSA_15869(Metabolism_of_nucleotides);R_HSA_1430728(Metabolism)	32.585	23.0418	41.6042	10.121	10.8811	9.59396	3.17789	1.66807	7.78203e-17	8.74665e-15	up	yes
ENSG00000112977	DAP	180603;180607;180606;180608	ENST00000230895;ENST00000510546;ENST00000508253;ENST00000508646	GO:0006914(autophagy);GO:0006915(apoptotic process);GO:0006919(activation of cysteine-type endopeptidase activity involved in apoptotic process);GO:0010507(negative regulation of autophagy);GO:0032088(negative regulation of NF-kappaB transcription factor activity);GO:0034198(cellular response to amino acid starvation);GO:0045892(negative regulation of transcription, DNA-templated);GO:0070513(deat…	NA	NA	NA	death associated protein [Source:HGNC Symbol;Acc:HGNC:2672]	protein_coding;processed_transcript;retained_intron	NA	NA	13.6388	14.8095	14.6688	35.3053	35.2937	27.695	0.438654	-1.18884	8.87057e-17	9.93816e-15	down	yes
ENSG00000053918	KCNQ1	36845;36847;36844	ENST00000155840;ENST00000646564;ENST00000496887	GO:0005216(ion channel activity);GO:0005244(voltage-gated ion channel activity);GO:0005249(voltage-gated potassium channel activity);GO:0005251(delayed rectifier potassium channel activity);GO:0005267(potassium channel activity);GO:0005515(protein binding);GO:0005516(calmodulin binding);GO:0005546(phosphatidylinositol-4,5-bisphosphate binding);GO:0005737(cytoplasm);GO:0005764(lysosome);GO:0005768…	04261(Adrenergic signaling in cardiomyocytes);04725(Cholinergic synapse);04971(Gastric acid secretion);04972(Pancreatic secretion);04974(Protein digestion and absorption);05110(Vibrio cholerae infection);05110(Vibrio cholerae infection)	K04926	NA	potassium voltage-gated channel subfamily Q member 1 [Source:HGNC Symbol;Acc:HGNC:6294]	protein_coding	DOID:934(viral_infectious_disease);DOID:6000(congestive_heart_failure);DOID:2842(Jervell_Lange_Nielsen_syndrome);DOID:28(endocrine_system_disease);DOID:630(genetic_disease);DOID:225(syndrome);DOID:936(brain_disease);DOID:850(lung_disease);DOID:0050117(disease_by_infectious_agent);DOID:4(disease);DOID:0050177(monogenic_disease);DOID:1579(respiratory_system_disease);DOID:11202(primary_hyperparathyr…	R_HSA_5576890(Phase_3_rapid_repolarisation);R_HSA_397014(Muscle_contraction);R_HSA_1296072(Voltage_gated_Potassium_channels);R_HSA_1296071(Potassium_Channels);R_HSA_5576891(Cardiac_conduction);R_HSA_112316(Neuronal_System);R_HSA_5576893(Phase_2_plateau_phase)	0.361189	0.323425	0.246509	1.671	1.51741	1.24159	0.210186	-2.25026	9.09655e-17	1.01588e-14	down	yes
ENSG00000062485	CS	55838;55862;55843;55858;55850;55857;55851;55868;55845;55854;55839;55859;55867;55841;55869;55846;55853;55856;55870;55842;55863;55847;55844;55849;55861;55864;55852;55871;55855	ENST00000351328;ENST00000551430;ENST00000546891;ENST00000551137;ENST00000551936;ENST00000547298;ENST00000550734;ENST00000551155;ENST00000548849;ENST00000547912;ENST00000548567;ENST00000550655;ENST00000550996;ENST00000542324;ENST00000550700;ENST00000552331;ENST00000547449;ENST00000551473;ENST00000551441;ENST00000546621;ENST00000552222;ENST00000549221;ENST00000546585;ENST00000548041;ENST00000550159…	GO:0003723(RNA binding);GO:0004108(citrate (Si)-synthase activity);GO:0005634(nucleus);GO:0005739(mitochondrion);GO:0005759(mitochondrial matrix);GO:0005975(carbohydrate metabolic process);GO:0006099(tricarboxylic acid cycle);GO:0006101(citrate metabolic process);GO:0016020(membrane);GO:0016021(integral component of membrane);GO:0016740(transferase activity);GO:0046912(transferase activity, trans…	00020(Citrate cycle (TCA cycle));00630(Glyoxylate and dicarboxylate metabolism);00630(Glyoxylate and dicarboxylate metabolism)	NA	NA	citrate synthase [Source:HGNC Symbol;Acc:HGNC:2422]	protein_coding;nonsense_mediated_decay;retained_intron	DOID:4(disease);DOID:162(cancer);DOID:14566(disease_of_cellular_proliferation)	R_HSA_1268020(Mitochondrial_protein_import);R_HSA_1428517(The_citric_acid_(TCA)_cycle_and_respiratory_electron_transport);R_HSA_71406(Pyruvate_metabolism_and_Citric_Acid_(TCA)_cycle);R_HSA_9609507(Protein_localization);R_HSA_71403(Citric_acid_cycle_(TCA_cycle));R_HSA_1430728(Metabolism)	14.4146	16.3714	17.643	42.0682	40.5491	31.9636	0.422663	-1.24242	9.27936e-17	1.03091e-14	down	yes
ENSG00000119946	CNNM1	33824;33825	ENST00000356713;ENST00000488090	GO:0005515(protein binding);GO:0005886(plasma membrane);GO:0006811(ion transport);GO:0016020(membrane);GO:0016021(integral component of membrane);GO:0022857(transmembrane transporter activity);GO:0030425(dendrite);GO:0043025(neuronal cell body);GO:0055085(transmembrane transport);GO:0055085(transmembrane transport)	NA	K16302	NA	cyclin and CBS domain divalent metal cation transport mediator 1 [Source:HGNC Symbol;Acc:HGNC:102]	protein_coding;processed_transcript	NA	NA	2.55589	2.68042	3.24781	8.37843	9.84683	5.95001	0.350942	-1.51069	9.29011e-17	1.03091e-14	down	yes
ENSG00000106397	PLOD3	208216;208223;208218;208222;208221;208225;208229;208219;208226;208224;208230;208215;208220;208227;208217;208228	ENST00000223127;ENST00000478082;ENST00000460132;ENST00000463479;ENST00000421736;ENST00000478264;ENST00000456079;ENST00000440925;ENST00000424135;ENST00000460475;ENST00000481461;ENST00000454310;ENST00000466881;ENST00000489927;ENST00000487563;ENST00000414785	GO:0001701(in utero embryonic development);GO:0001886(endothelial cell morphogenesis);GO:0003824(catalytic activity);GO:0005506(iron ion binding);GO:0005515(protein binding);GO:0005576(extracellular region);GO:0005615(extracellular space);GO:0005783(endoplasmic reticulum);GO:0005788(endoplasmic reticulum lumen);GO:0005789(endoplasmic reticulum membrane);GO:0005791(rough endoplasmic reticulum);GO:…	00310(Lysine degradation);00514(Other types of O-glycan biosynthesis);00514(Other types of O-glycan biosynthesis)	NA	NA	procollagen-lysine,2-oxoglutarate 5-dioxygenase 3 [Source:HGNC Symbol;Acc:HGNC:9083]	protein_coding;retained_intron;nonsense_mediated_decay	DOID:17(musculoskeletal_system_disease);DOID:4(disease);DOID:65(connective_tissue_disease);DOID:7(disease_of_anatomical_entity)	R_HSA_1474290(Collagen_formation);R_HSA_1474244(Extracellular_matrix_organization);R_HSA_1650814(Collagen_biosynthesis_and_modifying_enzymes)	2.24613	2.34476	2.77991	7.32173	6.52099	5.69381	0.377282	-1.40628	9.66642e-17	1.06927e-14	down	yes
[truncated: 37,877 more rows]
